# Supplementary material for: Enantioselective gold(i)-catalyzed rearrangement of cyclopropyl-substituted 1,6-enynes into 2-oxocyclobutyl-cyclopentanes
Source: Royal Society of Chemistry journal article supplement (doi:10.1039/c7cc03234j), 2017-01-01
Supplement: c7cc03234j1.pdf [file c7cc03234j1.pdf]

## Enantioselective Gold(I)-Catalyzed Rearrangement of Cyclopropyl-Substituted 1,6-Enynes into 2-Oxocyclobutyl-cyclopentanes

Zhiyong Wu,<sup>a,b</sup> David Leboeuf,<sup>b</sup> Pascal Retailleau,<sup>a</sup> Vincent Gandon,<sup>\*a,b</sup>  
Angela Marinetti<sup>a</sup> and Arnaud Voituriez<sup>\*a</sup>

<sup>a</sup>Institut de Chimie des Substances Naturelles, CNRS UPR 2301, Univ. Paris-Sud, Université Paris-Saclay, 1, av. de la Terrasse, 91198 Gif-sur-Yvette, France

E-mails: arnaud.voituriez@cnrs.fr

<sup>b</sup>Institut de Chimie Moléculaire et des Matériaux d'Orsay, CNRS UMR 8182, Univ. Paris-Sud, Université Paris-Saclay, bâtiment 420, 91405 Orsay cedex, France.

E-mail: vincent.gandon@u-psud.fr

### Table of Contents:

|                  |                                                           |              |
|------------------|-----------------------------------------------------------|--------------|
| <b>Part I:</b>   | <b>General information</b>                                | <b>SI-2</b>  |
| <b>Part II:</b>  | <b>Experimental Procedures</b>                            | <b>SI-3</b>  |
| <b>Part III:</b> | <b>NMR Spectra (<sup>1</sup>H and <sup>13</sup>C NMR)</b> | <b>SI-18</b> |
| <b>Part IV:</b>  | <b>HPLC Data</b>                                          | <b>SI-48</b> |
| <b>Part V:</b>   | <b>X-Ray crystal structure determination</b>              | <b>SI-61</b> |
| <b>Part VI:</b>  | <b>DFT Computations</b>                                   | <b>SI-63</b> |

## **I. General information**

All non-aqueous reactions were run under an inert atmosphere (argon), by using standard techniques for manipulating air-sensitive compounds. Anhydrous solvents were obtained by filtration through drying columns (THF, Et<sub>2</sub>O, CH<sub>2</sub>Cl<sub>2</sub>, DMF). All reagents and solvents were of commercial quality and were used without further purification. Analytical thin-layer chromatography (TLC) was performed on plates precoated with silica gel (Merck 60 F<sub>254</sub>). The developed chromatograms were visualized by UV absorbance. Flash column chromatography was performed using 40-63 mesh silica gel. Purifications have been performed on a CombiFlash Companion TS Chromatography system, unless otherwise stated. NMR spectra (<sup>1</sup>H, <sup>13</sup>C, <sup>31</sup>P) were recorded on either Bruker AV 500 or AV 300 spectrometers. Chemical shifts are reported in parts per million relative to an internal standard of residual chloroform ( $\delta = 7.26$  ppm for <sup>1</sup>H NMR and 77.16 ppm for <sup>13</sup>C NMR). IR spectra have been recorded on a Perkin-Elmer FT-IR spectrophotometer and are reported in reciprocal centimeters (cm<sup>-1</sup>). High resolution mass spectra (HRMS-ESI) and MS (FAB+) data have been recorded with the mass spectrometer Vg Analytical 7070 EQ. Optical rotations have been determined on a JASCO P-1010 polarimeter. Data are reported as follows:  $[\alpha]_D^{\text{temp}}$  ( $c$  in g/100 mL, solvent). HPLC was performed at a column temperature of 20-35 °C on a Waters 2695 Separations Module equipped with a diode array UV detector. Data are reported as follows: column type, eluent, flow rate, retention time ( $t_r$ ).

## II. Experimental Procedures

### II.1. Synthesis of substrates:

#### 1. Substrate 1a:

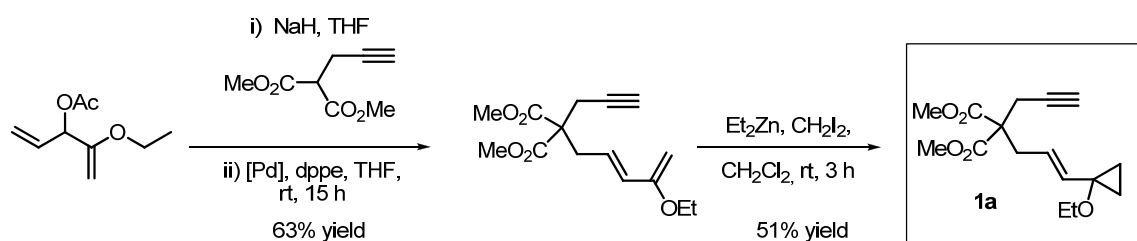

Compound **1a** was synthesized according to the described procedures.<sup>1</sup>

<sup>1</sup>H NMR (300 MHz, CDCl<sub>3</sub>) δ 5.47-5.26 (m, 2H), 3.68 (s, 6H), 3.38 (q, *J* = 6.9 Hz, 2H), 2.78-2.68 (m, 4H), 1.98 (t, *J* = 2.7 Hz, 1H), 1.08 (t, *J* = 6.9 Hz, 3H), 0.97 (dd, *J* = 7.5, 5.4 Hz, 2H), 0.64 (dd, *J* = 7.5, 5.4 Hz, 2H).

#### 2. Substrate 1b:

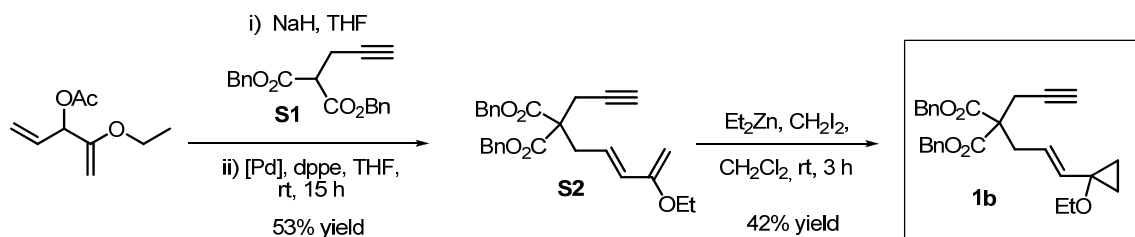

Compound **S1** was synthesized according to the described procedure.<sup>2</sup>

Purification by flash column chromatography of the filtrate (silica gel; petroleum ether/ MTBE/ 95/5) gave the desired compound as colorless oil (43% yield). <sup>1</sup>H NMR (300 MHz, CDCl<sub>3</sub>) δ 7.36-7.25 (m, 10H), 5.18 (s, 4H), 3.71 (t, *J* = 7.8 Hz, 1H), 2.83 (dd, *J* = 7.8, 2.7 Hz, 2H), 2.00 (m, 1H).

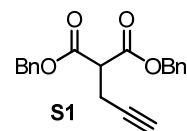

To a dry schlenk charged with allylpalladium chloride dimer (32 mg, 0.086 mmol) and dppe (85 mg, 0.22 mmol) in 10 mL of dry THF, the acetic acid 2-ethoxy-1-vinyl-allyl ester (363 mg, 2.2 mmol) was slowly added under argon.

The resulting solution was stirred at room temperature for 30 min before the

sodium salt solution of dibenzyl propargylmalonate [which was previously prepared by addition of malonate (690 mg, 2.2 mmol) to NaH (86 mg, 2.2 mmol, 60% dispersion mineral oil) in 15 mL THF] was added. The mixture was stirred at room temperature for 16 h then quenched with 20 mL saturated NH<sub>4</sub>Cl solution, extracted with EtOAc and washed with brine before drying over MgSO<sub>4</sub>. The solvent was removed under reduced pressure and the crude was purified by chromatography on silica gel with (10/1/0.5 petroleum ether/ MTBE/triethylamine) afforded diene **S2** as a colorless oil (531 mg, 53% yield). <sup>1</sup>H NMR (300 MHz, CDCl<sub>3</sub>) δ 7.37-7.24 (m, 10H), 5.98-5.79 (m, 2H), 5.15 (s, 4H), 4.08 (s, 1H), 4.01 (s, 1H), 3.78 (q, *J* = 6.9 Hz, 2H), 2.91 (d, *J* = 7.2 Hz, 2H), 2.87 (d, *J* = 2.7 Hz, 2H), 2.02 (t, *J* = 2.4 Hz, 1H), 1.33 (t, *J* = 6.9 Hz, 3H); <sup>13</sup>C NMR (75 MHz, CDCl<sub>3</sub>) δ 169.4 (C), 157.6

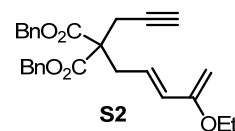

<sup>1</sup> a) P. A. Wender, A. J. Dyckman, C. O. Husfeld, D. Kadereit, J. A. Love, H. Rieck, *J. Am. Chem. Soc.* **1999**, *121*, 10442-10443; b) E. Jimenez-Nunez, C. K. Claverie, C. Nieto-Oberhuber, A. M. Echavarren *Angew. Chem. Int. Ed.* **2006**, *45*, 5452-5455.

<sup>2</sup> C. Kourra, F. Klotter, F. Sladojevich, D. J. Dixon, *Org. Lett.*, **2012**, *14*, 1016-1019.

(C), 135.2 (C), 131.4 (CH), 128.5 (CH), 128.3 (CH), 128.2 (CH), 122.9 (CH), 86.5 (CH<sub>2</sub>), 78.8 (C), 71.8 (CH), 67.4 (CH<sub>2</sub>), 62.7 (CH<sub>2</sub>), 57.2 (C), 35.0 (CH<sub>2</sub>), 22.7 (CH<sub>2</sub>), 14.5 (CH<sub>3</sub>); **HRMS** (ESI) calcd. for C<sub>27</sub>H<sub>28</sub>NaO<sub>5</sub> [M+ Na]<sup>+</sup>: 455.1834, found: 455.1951.

**S2** (530 mg, 1.23 mmol) was dissolved in 10 mL anhydrous CH<sub>2</sub>Cl<sub>2</sub> under argon. The diethylzinc (1.1 mL, 1.0 M in hexanes, 1.1 mmol) and diiodomethane (294 mg, 1.1 mmol) was sequentially added to this solution. The resulting reaction mixture was stirred at room for 3 h then quenched with 10 mL saturated NH<sub>4</sub>Cl.

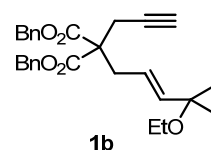

The organic layer was washed with 10 mL saturated NaHCO<sub>3</sub> and 10 mL H<sub>2</sub>O and then dried over MgSO<sub>4</sub>. The solvent was removed in *vacuo* and the residue was purified by flash chromatography (petroleum ether/ EtOAc 90/10) gave the desired compound as colorless oil (42% yield, 225 mg). **<sup>1</sup>H NMR** (300 MHz, CDCl<sub>3</sub>) δ 7.36-7.20 (m, 10H), 5.44-5.25 (m, 2H), 5.13 (s, 4H), 3.40 (q, *J* = 6.9 Hz, 2H), 2.55-2.58 (m, 4H), 1.99 (t, *J* = 2.7 Hz, 1H), 1.12 (t, *J* = 7.2 Hz, 3H), 0.94 (dd, *J* = 7.5, 5.4 Hz, 2H), 0.56 (dd, *J* = 7.5, 5.4 Hz, 2H); **<sup>13</sup>C NMR** (75 MHz, CDCl<sub>3</sub>) δ 169.6 (C), 136.8 (CH), 135.4 (C), 128.7 (CH), 128.5 (CH), 128.3 (CH), 120.9 (CH), 78.9 (C), 71.8 (CH), 67.5 (CH<sub>2</sub>), 63.1 (CH<sub>2</sub>), 60.9 (C), 57.3 (C), 34.9 (CH<sub>2</sub>), 22.7 (CH<sub>2</sub>), 15.6 (CH<sub>3</sub>), 14.5 (CH<sub>2</sub>); **IR**: *v*<sub>max</sub> = 3291, 3034, 2973, 1733, 1498, 1456, 1279, 1245, 1217, 1191, 1169, 1061, 968, 946, 906, 745, 736, 696 cm<sup>-1</sup>; **HRMS** (ESI) calcd. for C<sub>28</sub>H<sub>30</sub>NaO<sub>5</sub> [M+ Na]<sup>+</sup>: 469.1991, found: 469.2032.

### 3. Substrate 1c:

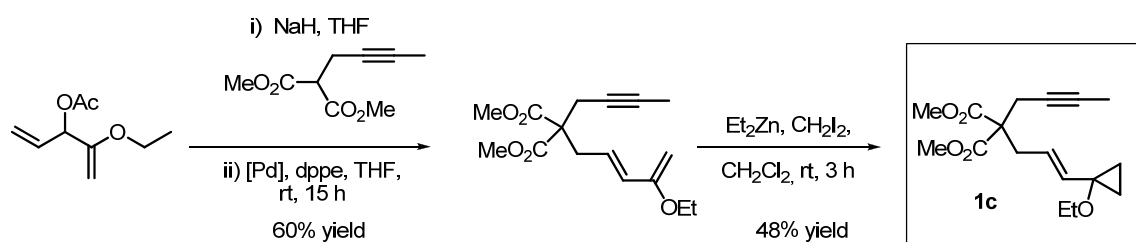

Compound **1c** was synthesized according to the described procedures.<sup>3</sup> Purification by flash column chromatography on silica gel (petroleum ether/ EtOAc 80/20) gave the desired compound as colorless oil (48% yield). **<sup>1</sup>H NMR** (500 MHz, CDCl<sub>3</sub>) δ 5.39-5.26 (m, 2H), 3.65 (s, 6H), 3.37 (q, *J* = 7.0 Hz, 2H), 2.69 (d, *J* = 7.0 Hz, 2H), 2.65 (d, *J* = 2.5 Hz, 2H), 1.70-1.65 (m, 3H), 1.07 (t, *J* = 7.5 Hz, 3H), 0.88 (dd, *J* = 7.0, 5.0 Hz, 2H), 0.56 (dd, *J* = 7.0, 5.0 Hz, 2H); **<sup>13</sup>C NMR** (75 MHz, CDCl<sub>3</sub>) δ 170.5 (C), 136.0 (CH), 121.4 (CH), 78.9 (C), 73.2 (C), 62.8 (CH<sub>2</sub>), 60.8 (C), 57.5 (C), 52.6 (CH<sub>3</sub>), 35.0 (CH<sub>2</sub>), 23.0 (CH<sub>2</sub>), 15.4 (CH<sub>3</sub>), 14.2 (CH<sub>2</sub>), 3.4 (CH<sub>3</sub>); **IR**: *v*<sub>max</sub> = 2976, 2953, 1737, 1438, 1326, 1286, 1229, 1203, 1181, 1063, 1029, 973 cm<sup>-1</sup>; **HRMS** (ESI) calcd. for C<sub>17</sub>H<sub>24</sub>NaO<sub>5</sub> [M+ Na]<sup>+</sup>: 331.1521, found: 331.1600.

### 4. Substrate 1d:

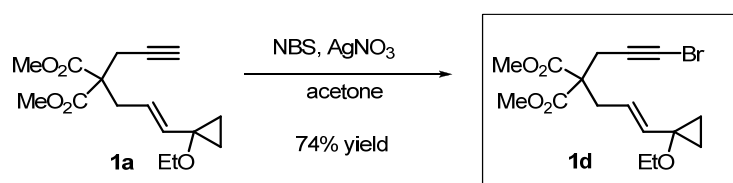

NBS (103 mg, 0.58 mmol) and AgNO<sub>3</sub> (17.3 mg, 0.1 mmol) were added to the solution of **1a** (100 mg,

<sup>3</sup> B. M. Trost, H. C. Shen, D. B. Horne, F. D. Toste, B. G. Steinmetz, C. Koradin, *Chem. Eur. J.* **2005**, *11*, 2577-2590.

0.34 mmol) in acetone (4 mL) under argon. The reaction mixture was stirred at room temperature for 4 hours then quenched with sat. NaHCO<sub>3</sub> solution. The mixture was extracted with EtOAc, the combined organic layers were washed with brine and dried over MgSO<sub>4</sub>. The solvent was removed under reduced pressure and the residue was purified by flash column chromatography on silica gel using PE/EtOAc (90/10) as eluent to give the desired product **1d** as colorless oil (90 mg, 74% yield). **<sup>1</sup>H NMR** (300 MHz, CDCl<sub>3</sub>) δ 5.46-5.26 (m, 2H), 3.72 (s, 6H), 3.42 (q, *J* = 6.9 Hz, 2H), 2.82-2.72 (m, 4H), 1.13 (t, *J* = 6.9 Hz, 3H), 0.95 (dd, *J* = 7.5, 5.4 Hz, 2H), 0.62 (dd, *J* = 7.5, 5.4 Hz, 2H); **<sup>13</sup>C NMR** (75 MHz, CDCl<sub>3</sub>) 170.2 (C), 136.7 (CH), 120.9 (CH), 74.9 (C), 63.0 (CH<sub>2</sub>), 60.9 (C), 57.2 (C), 52.9 (CH<sub>3</sub>), 41.6 (C), 35.3 (CH<sub>2</sub>), 24.0 (CH<sub>2</sub>), 15.6 (CH<sub>3</sub>), 14.4 (CH<sub>2</sub>); **IR**:  $\nu_{max}$  = 2975, 2955, 1737, 1437, 1285, 1227, 1202, 1181, 1062, 973 cm<sup>-1</sup>; **HRMS** (ESI) calcd. for C<sub>16</sub>H<sub>22</sub>BrO<sub>5</sub> [M+H]<sup>+</sup>: 373.0651, found: 373.0645.

### 5. Substrate 1e

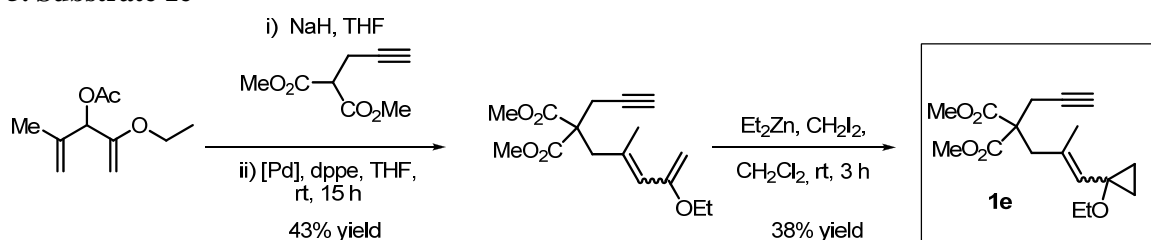

Compound **1e** was synthesized according to the procedure described for **1a**.<sup>1</sup> The crude was purified by flash column chromatography with 15/1 (petroleum ether /EtOAc) gave product **1e** (mixture *E/Z* 8:1) as a colorless oil (38% yield). **<sup>1</sup>H NMR** (300 MHz, CDCl<sub>3</sub>) δ 5.42 (s, 1H), 3.73 (s, 6H), 3.42 (q, *J* = 7.2 Hz, 2H), 2.82 (s, 2H), 2.78 (d, *J* = 2.7 Hz, 2H), 2.03 (t, *J* = 2.7 Hz, 1H), 1.76 (d, *J* = 0.6 Hz, 3H), 1.11 (t, *J* = 7.2 Hz, 3H), 0.93 (dd, *J* = 6.9, 4.5 Hz, 2H), 0.54 (dd, *J* = 6.9, 4.8 Hz, 2H); **HRMS** (ESI) calcd. for C<sub>17</sub>H<sub>24</sub>NaO<sub>5</sub> [M+ Na]<sup>+</sup>: 331.1521, found: 331.1581.

### 6. Substrate 1f:

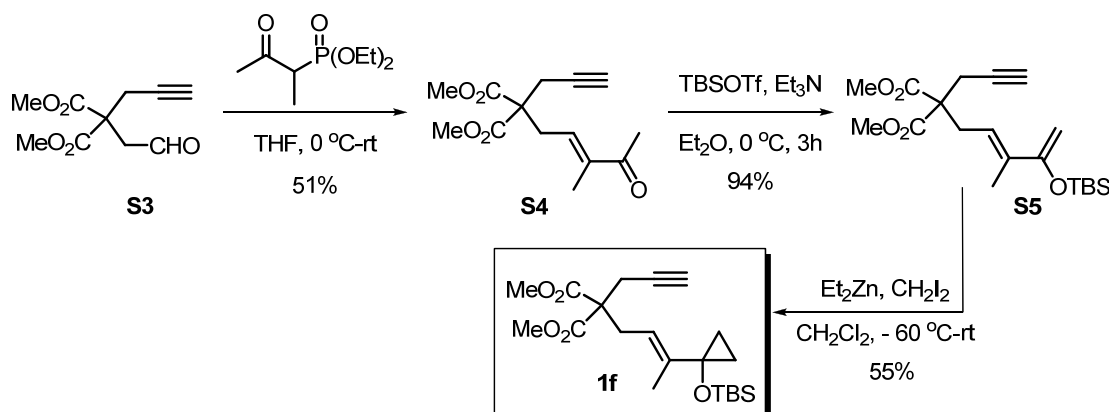

Diethyl 3-oxobutan-2-ylphosphonate (375 mg, 1.8 mmol) in dry THF (3 mL) was added to a stirring suspension of NaH (72mg, 1.8 mmol) in dry THF (5 mL) at 0 °C under argon. After 1 hour stirring at 0 °C, a solution of aldehyde **S3**<sup>4</sup> (191 mg, 0.9 mmol) in dry THF (5 mL) was added dropwise to the resulting mixture. The solution was stirred at room temperature for another 4 hours then quenched by the addition of

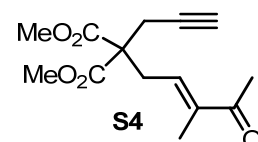

<sup>4</sup> a) E. Dunach, R. L. Halterman, K. P. C. Vollhardt, *J. Am. Chem. Soc.*, **1985**, *107*, 1664-1671 ; b) F. Cambeiro, S. Lopez, J. A. Varela, C. Saa, *Angew. Chem. Int. Ed.* **2014**, *53*, 5959-5963.

saturated  $\text{NH}_4\text{Cl}$  (10 mL). After extracted by with diethyl ether, the combined organic layers were dried over  $\text{MgSO}_4$  and concentrated under reduced pressure. The crude was purified by flash column chromatography on silica gel (PE/ethyl acetate 80/20) to obtain compound **S4** (120 mg, 51% yield) as a white solid.  $^1\text{H NMR}$  (300 MHz,  $\text{CDCl}_3$ )  $\delta$  6.45 (t,  $J = 7.2$  Hz, 1H), 3.76 (s, 6H), 3.01 (d,  $J = 7.5$  Hz, 2H), 2.83 (d,  $J = 2.4$  Hz, 2H), 2.28 (s, 3H), 2.06 (t,  $J = 2.4$  Hz, 1H), 1.81 (s, 3H);  $^{13}\text{C NMR}$  (75 MHz,  $\text{CDCl}_3$ ) 199.4 (C), 169.9 (C), 141.0 (C), 135.5 (CH), 78.4 (C), 72.1 (CH), 56.6 (C), 53.1 ( $\text{CH}_3$ ), 32.0 ( $\text{CH}_2$ ), 25.6 ( $\text{CH}_3$ ), 23.5 ( $\text{CH}_2$ ), 11.4 ( $\text{CH}_3$ ); **IR**:  $\nu_{\text{max}} = 2956, 1733, 1670, 1436, 1291, 1200, 1183, 1054, 975 \text{ cm}^{-1}$ ; **HRMS** (ESI) calcd. for  $\text{C}_{14}\text{H}_{19}\text{O}_5$   $[\text{M}+\text{H}]^+$ : 267.1232, found: 267.1310.

Compound **S5** was synthesized according to the same procedure used for **S10**.

(160 mg, 94%).  $^1\text{H NMR}$  (500 MHz,  $\text{CDCl}_3$ )  $\delta$  5.79 (t,  $J = 8.0$  Hz, 1H), 4.43 (s, 1H), 4.26 (s, 1H), 3.72 (s, 6H), 2.93 (d,  $J = 7.5$  Hz, 2H), 2.77 (s, 2H), 1.99 (s, 1H), 1.80 (s, 3H), 0.94 (s, 9H), 0.14 (s, 6H);  $^{13}\text{C NMR}$  (75 MHz,  $\text{CDCl}_3$ ) 170.3 (C), 156.8 (C), 135.4 (C), 120.6 (CH), 92.1 ( $\text{CH}_2$ ), 79.1 (C), 71.5 (CH), 57.1 (C), 52.9 ( $\text{CH}_3$ ), 31.2 ( $\text{CH}_2$ ), 25.9 ( $\text{CH}_3$ ), 22.9 ( $\text{CH}_2$ ), 18.3 (C), 13.5 ( $\text{CH}_3$ ), -4.6 ( $\text{CH}_3$ ); **IR**:  $\nu_{\text{max}} = 3292, 2955, 1739, 1596, 1436, 1253, 1211, 1046, 1016, 1005, 832, 781 \text{ cm}^{-1}$ ; **HRMS** (ESI) calcd. for  $\text{C}_{20}\text{H}_{33}\text{O}_5\text{Si}$   $[\text{M}+\text{H}]^+$ : 381.2097, found: 381.2157.

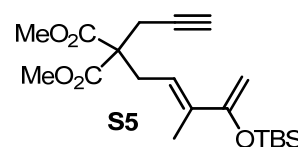

Compound **1f** was prepared following the same procedure for the synthesis

of **1j** (88 mg, 55%).  $^1\text{H NMR}$  (300 MHz,  $\text{CDCl}_3$ )  $\delta$  5.19 (t,  $J = 7.2$  Hz, 1H), 3.72 (s, 6H), 2.84-2.72 (m, 4H), 2.00 (bs, 1H), 1.72 (s, 3H), 0.83 (s, 9H), 0.78 (m, 2H), 0.67 (m, 2H), 0.36 (s, 6H);  $^{13}\text{C NMR}$  (75 MHz,  $\text{CDCl}_3$ ) 170.5 (C), 141.6 (C), 116.8 (CH), 79.2 (C), 71.5 (CH), 61.0 (C), 57.1 (C), 52.9 ( $\text{CH}_3$ ), 30.6 ( $\text{CH}_2$ ), 25.9 ( $\text{CH}_3$ ), 22.8 ( $\text{CH}_2$ ), 17.9 (C), 14.1 ( $\text{CH}_3$ ), 13.5 ( $\text{CH}_2$ ), -3.6 ( $\text{CH}_3$ ); **IR**:  $\nu_{\text{max}} = 2955, 2931, 2857, 1738, 1437, 1287, 1238, 1212, 1025, 836, 776 \text{ cm}^{-1}$ ; **HRMS** (ESI) calcd. for  $\text{C}_{21}\text{H}_{35}\text{O}_5\text{Si}$   $[\text{M}+\text{H}]^+$ : 395.2254, found: 395.2353.

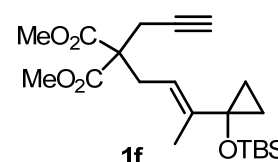

## 7. Substrate **1g**:

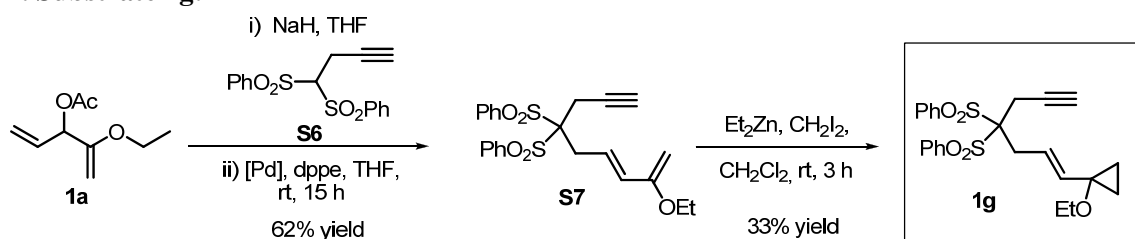

Compound **1g** was synthesized according to the described procedure.<sup>5</sup>

The crude was purified by flash chromatography (silica gel: petroleum ether/ EtOAc 60/40) to give 480 mg of **S6** as a white solid (60% yield),  $R_f = 0.61$  (60% of petroleum ether/ EtOAc).  $^1\text{H NMR}$  (300 MHz,  $\text{CDCl}_3$ )  $\delta$  8.01 (d,  $J = 7.5$  Hz, 4H), 7.73 (t,  $J = 7.5$  Hz, 2H), 7.59 (t,  $J = 7.8$  Hz, 4H), 4.60 (t,  $J = 6.3$  Hz, 1H), 3.13 (dd,  $J = 6.3, 2.7$  Hz, 2H), 1.94 (t,  $J = 2.7$  Hz, 1H).

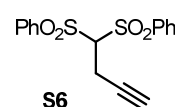

Compound **S7** was synthesized according to the procedure described for **S2**. Purification by flash column chromatography of the filtrate (6/4/0.5 petroleum ether/ MTBE/triethylamine) gave the desired compound as colorless oil (62% yield, 270 mg).  $^1\text{H NMR}$  (500 MHz,  $\text{CDCl}_3$ )  $\delta$  8.11 (d,  $J = 7.5$  Hz, 4H), 7.69 (t,

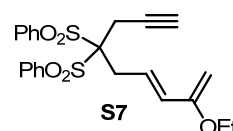

<sup>5</sup> J. R. Rodriguez, L. Castedo, J. L. Mascarenas, *J. Org. Chem.* **2000**, *65*, 2528-2531

$J = 7.5$  Hz, 2H), 7.56 (t,  $J = 7.5$  Hz, 4H), 6.21-6.13 (m, 1H), 6.01 (d,  $J = 15.5$  Hz, 1H), 4.12 (s, 1H), 4.08 (s, 1H), 3.79 (q,  $J = 7.0$  Hz, 2H), 3.19-3.12 (m, 4H), 2.12 (t,  $J = 3.0$  Hz, 1H), 1.33 (t,  $J = 7.0$  Hz, 3H);  $^{13}\text{C NMR}$  (75 MHz,  $\text{CDCl}_3$ )  $\delta$  157.5 (C), 136.5 (C), 134.9 (CH), 132.8 (CH), 131.6 (CH), 128.6 (CH), 120.7 (CH), 89.0 (C), 87.1 ( $\text{CH}_2$ ), 75.8 (C), 74.5 (CH), 62.9 ( $\text{CH}_2$ ), 32.2 ( $\text{CH}_2$ ), 21.0 ( $\text{CH}_2$ ), 14.5 ( $\text{CH}_3$ ); **HRMS** (ESI) calcd. for  $\text{C}_{23}\text{H}_{24}\text{NaO}_5\text{S}_2$  [ $\text{M} + \text{Na}$ ] $^+$ : 467.0963, found: 467.1053.

Compound **1g** was synthesized according to the procedure described for **1b**. Purification by flash column chromatography of the filtrate (petroleum ether/EtOAc 60/40) gave the desired compound as colorless oil (33% yield, 120 mg).  $^1\text{H NMR}$  (300 MHz,  $\text{CDCl}_3$ )  $\delta$  8.14-8.07 (m, 4H), 7.75-7.66 (m, 2H), 7.62-7.52 (m, 4H), 5.85-5.70 (m, 1H), 5.51 (d,  $J = 15.3$  Hz, 1H), 3.53 (q,  $J = 6.9$  Hz, 2H), 3.16 (d,  $J = 2.7$  Hz, 2H), 3.10 (dd,  $J = 6.9, 0.6$  Hz, 2H), 2.07 (t,  $J = 2.7$  Hz, 1H), 1.18 (t,  $J = 6.9$  Hz, 3H), 1.02 (dd,  $J = 7.5, 5.4$  Hz, 2H), 0.69 (dd,  $J = 7.5, 5.4$  Hz, 2H);  $^{13}\text{C NMR}$  (75 MHz,  $\text{CDCl}_3$ ) 138.4 (CH), 136.7 (C), 134.9 (CH), 131.6 (CH), 128.7 (CH), 118.4 (CH), 89.0 (C), 76.0 (C), 74.4 (CH), 63.3 ( $\text{CH}_2$ ), 61.0 (C), 32.0 ( $\text{CH}_2$ ), 20.9 ( $\text{CH}_2$ ), 15.6 ( $\text{CH}_3$ ), 14.5 ( $\text{CH}_2$ ); **IR**:  $\nu_{\text{max}} = 3275, 2968, 1584, 1448, 1331, 1310, 1144, 1077, 1060, 1021, 910, 801, 725, 685$   $\text{cm}^{-1}$ ; **HRMS** (ESI) calcd. for  $\text{C}_{24}\text{H}_{26}\text{NaO}_5\text{S}_2$  [ $\text{M} + \text{Na}$ ] $^+$ : 481.1119, found: 481.1183.

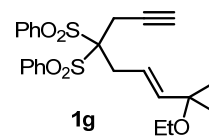

## 8. Substrate 1h:

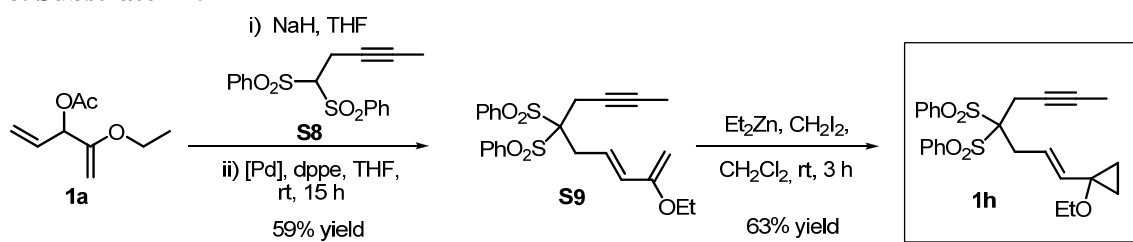

Compound **S8** was prepared according to the known procedure.<sup>6</sup> Purification by flash column chromatography (petroleum ether/EtOAc 60/40) to give the 1,1-bis(phenylsulfonyl)-pent-3-yne (532 mg, 52% yield) as a white solid.  $^1\text{H NMR}$  (300 MHz,  $\text{CDCl}_3$ )  $\delta$  8.01 (d,  $J = 7.2$  Hz, 4H), 7.71 (t,  $J = 7.5$  Hz, 2H), 7.59 (t,  $J = 7.8$  Hz, 4H), 4.54 (t,  $J = 6.0$  Hz, 1H), 3.08 (ddd,  $J = 8.4, 5.1, 2.4$  Hz, 2H), 1.52 (t,  $J = 2.7$  Hz, 3H).

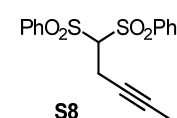

Compound **S9** was synthesized according to the procedure described for **S2**. Purification by flash column chromatography (6/4/0.5 petroleum ether/MTBE/triethylamine) gave the desired compound as colorless oil (410 mg, 59% yield).  $^1\text{H NMR}$  (300 MHz,  $\text{CDCl}_3$ )  $\delta$  8.05 (d,  $J = 7.5$  Hz, 4H), 7.64 (t,  $J = 7.5$  Hz, 2H), 7.52 (t,  $J = 7.8$  Hz, 4H), 6.24-6.08 (m, 1H), 5.96 (d,  $J = 15.3$  Hz, 1H), 4.09 (s, 1H), 4.05 (s, 1H), 3.75 (q,  $J = 6.9$  Hz, 2H), 3.19-3.01 (m, 4H), 1.59 (s, 3H), 1.29 (t,  $J = 6.9$  Hz, 3H);  $^{13}\text{C NMR}$  (75 MHz,  $\text{CDCl}_3$ ) 157.5 (C), 136.9 (C), 134.6 (CH), 132.1 (CH), 131.4 (CH), 128.4 (CH), 121.1 (CH), 89.2 (C), 86.8 ( $\text{CH}_2$ ), 81.9 (C), 70.7 (C), 62.8 ( $\text{CH}_2$ ), 32.6 ( $\text{CH}_2$ ), 21.4 ( $\text{CH}_2$ ), 14.4 ( $\text{CH}_3$ ), 3.5 ( $\text{CH}_3$ ); **HRMS** (ESI) calcd. for  $\text{C}_{24}\text{H}_{26}\text{NaO}_5\text{S}_2$  [ $\text{M} + \text{Na}$ ] $^+$ : 481.1119, found: 481.1162.

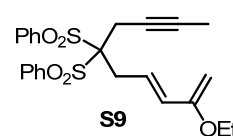

Compound **1h** was synthesized according to the procedure described for **1b**. Purification by flash column chromatography (petroleum ether/EtOAc 60/40) gave the desired compound as colorless oil (63% yield, 260 mg).  $^1\text{H NMR}$  (300

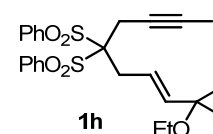

<sup>6</sup> B. P. Peppers, S. T. Diver, *J. Am. Chem. Soc.* **2004**, *126*, 9524-9525.

MHz, CDCl<sub>3</sub>) δ 8.12-8.05 (m, 4H), 7.70 (tt, *J* = 7.5, 1.2 Hz, 2H), 7.62-7.52 (m, 4H), 5.86-5.72 (m, 1H), 5.50 (d, *J* = 18.3 Hz, 1H), 3.54 (q, *J* = 7.2 Hz, 2H), 3.15 (dd, *J* = 5.4, 2.7 Hz, 2H), 3.06 (dd, *J* = 7.2, 1.2 Hz, 2H), 1.62 (t, *J* = 2.7 Hz, 3H), 1.19 (t, *J* = 7.2 Hz, 3H), 1.02 (dd, *J* = 7.2, 5.1 Hz, 2H), 0.69 (dd, *J* = 7.2, 4.8 Hz, 2H); <sup>13</sup>C NMR (75 MHz, CDCl<sub>3</sub>) 137.8 (CH), 137.3 (C), 134.7 (CH), 131.7 (CH), 128.6 (CH), 119.1 (CH), 89.5 (C), 81.9 (C), 70.9 (C), 63.4 (CH<sub>2</sub>), 61.1 (C), 32.5 (CH<sub>2</sub>), 21.4 (CH<sub>2</sub>), 15.7 (CH<sub>3</sub>), 14.5 (CH<sub>2</sub>), 3.8 (CH<sub>3</sub>); IR: *v*<sub>max</sub> = 3065, 2974, 2920, 1583, 1448, 1332, 1311, 1145, 1078, 1062, 757, 727, 689 cm<sup>-1</sup>; HRMS (ESI) calcd. for C<sub>25</sub>H<sub>28</sub>NaO<sub>5</sub>S<sub>2</sub> [M+Na]<sup>+</sup>: 495.1276, found: 495.1331.

## 9. Substrate 1i:

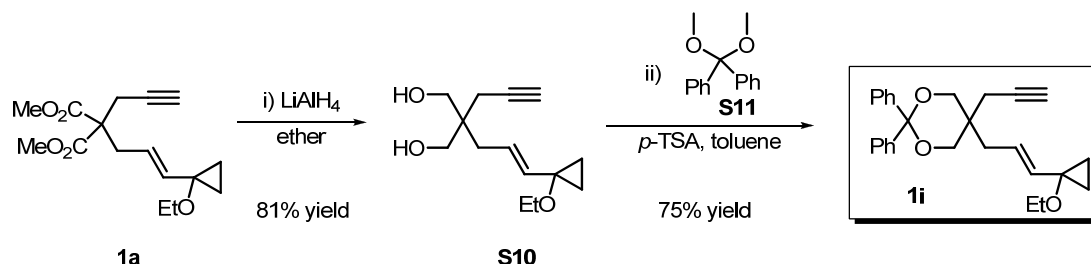

Compound **S10** was prepared according to the well known procedure.<sup>1b</sup> The crude mixture was purified by flash column chromatography (silica gel, 60/40 PE/EtOAc), to afford diol **S10** as a colorless oil (80 mg, 81%). <sup>1</sup>H NMR (500 MHz, CDCl<sub>3</sub>) δ 5.58-5.49 (m, 1H), 5.43 (d, *J* = 15.5 Hz, 1H), 3.61 (m, 4H), 3.46 (q, *J* = 7.0 Hz, 2H), 2.86 (bs, 2H), 2.22 (d, *J* = 2.5 Hz, 2H), 2.11 (d, *J* = 7.5 Hz, 2H), 2.00 (t, *J* = 2.5 Hz, 1H), 1.14 (t, *J* = 7.0 Hz, 3H), 0.95 (dd, *J* = 7.0, 5.0 Hz, 2H), 0.63 (dd, *J* = 7.5, 5.0 Hz, 2H).

Compound **S11** was prepared according to the described procedure.<sup>7</sup> <sup>1</sup>H NMR (300 MHz, CDCl<sub>3</sub>) δ 7.54-7.47 (m, 4H), 7.34-7.17 (m, 6H), 3.13 (s, 6H).

The diol **S10** (80 mg, 0.34 mmol) and **S11** (1.14g, 5 mmol) were dissolved in anhydrous toluene (10 mL) under argon. *p*-TSA (57 mg, 0.068 mmol) was added to the solution under argon. The resulting mixture was stirred at rt for 8 hours. The reaction mixture was stopped by the addition of 5 drops of Et<sub>3</sub>N and extracted with MTBE. The combined organic layers were washed with sat. aq. NaHCO<sub>3</sub> (5 ml) and brine (5 ml) and dried over MgSO<sub>4</sub>. The solvent was removed under reduced pressure and the crude mixture was purified by flash column chromatography (silica gel, 90/10 Petroleum ether/EtOAc) to give the desired product **1i** as a colorless oil (102 mg, 75%). <sup>1</sup>H NMR (300 MHz, CDCl<sub>3</sub>) δ 7.56-7.46 (m, 4H), 7.42-7.21 (m, 6H), 5.56-5.53 (m, 1H), 5.35 (d, *J* = 15.6 Hz, 1H), 3.90-3.70 (m, 4H), 3.40 (q, *J* = 6.9 Hz, 2H), 2.50 (d, *J* = 2.7 Hz, 2H), 2.13 (d, *J* = 7.2 Hz, 2H), 2.00 (t, *J* = 2.7 Hz, 1H), 1.14 (t, *J* = 7.2 Hz, 3H), 0.95 (dd, *J* = 7.2, 5.1 Hz, 2H), 0.61 (dd, *J* = 7.2, 5.1 Hz, 2H); <sup>13</sup>C NMR (75 MHz, CDCl<sub>3</sub>) 142.8 (C), 140.5 (C), 135.4 (CH), 128.7 (CH), 128.3 (CH), 128.05 (CH), 127.97 (CH), 127.1 (CH), 126.1 (CH), 121.4 (CH), 101.4 (C), 80.7 (C), 71.1 (CH), 68.4 (CH<sub>2</sub>), 63.0 (CH<sub>2</sub>), 61.0 (C), 35.9 (C), 35.0 (CH<sub>2</sub>), 22.5 (CH<sub>2</sub>), 15.6 (CH<sub>3</sub>), 14.4 (CH<sub>2</sub>); IR: *v*<sub>max</sub> = 3301, 2972, 2870, 1491, 1452, 1287, 1261, 1198, 1118, 1093, 1065, 1029, 977, 770, 748, 707, 694 cm<sup>-1</sup>; HRMS (ESI) calcd. for C<sub>27</sub>H<sub>31</sub>O<sub>3</sub> [M+H]<sup>+</sup>: 403.2273, found: 403.2322.

## 10. Substrate 1j:

<sup>7</sup> M. Aepkers, B. Wünsch, *Arch. Pharm. Pharm. Med. Chem.* **2004**, 337, 67-75



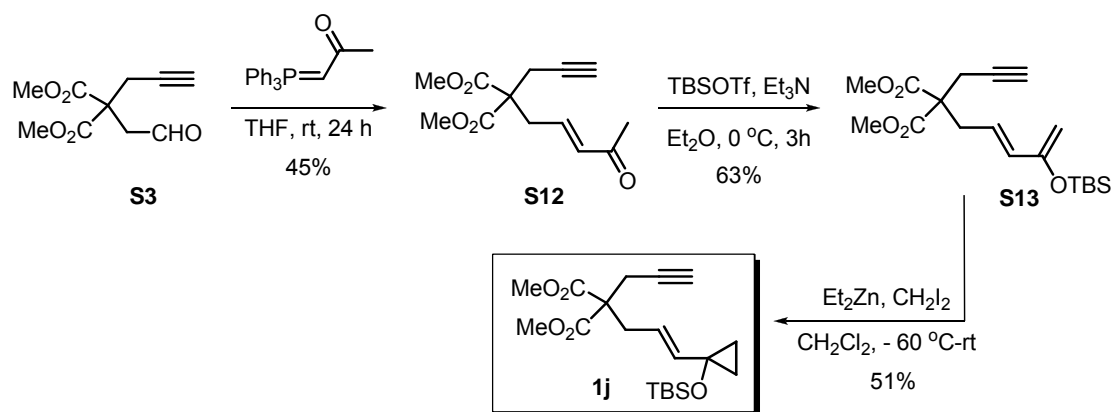

2-(2-oxoethyl)-2-(prop-2-yn-1-yl)malonate **S12** was prepared according to the well known procedure with a slight modification.<sup>8</sup> The dimethyl 2-((1,3-dioxolan-2-yl)methyl)-2-(prop-2-ynyl)malonate<sup>9</sup> (1.12 g, 4.4 mmol) was dissolved in conc. formic acid (4 ml), and the resulting solution was stirred at room temperature for 16 hours. After neutralization with *sat.* NaHCO<sub>3</sub>, the mixture was extracted with diethyl ether; the organic layers were collected, dried over MgSO<sub>4</sub> and concentrated under reduced pressure. The crude was purified by flash column chromatography (silica gel, 80/20 PE/EtOAc) afforded the aldehyde **S3** as a white solid (810 mg, 88%). <sup>1</sup>H NMR (300 MHz, CDCl<sub>3</sub>) δ 9.73 (s, 1H), 3.76 (s, 6H), 3.26 (s, 2H), 2.97 (d, *J* = 2.7 Hz, 2H), 2.03 (t, *J* = 2.7 Hz, 1H).

2-(2-oxoethyl)-2-(prop-2-yn-1-yl)malonate **S3** (490 mg, 2.31 mmol) and 1-(triphenylphosphoranylidene)-2-propanone (768 mg, 2.43 mmol) were dissolved in 30 mL THF under argon at rt. The resulting mixture was stirred at rt for 24 hours, then quenched by the addition of 15 mL of H<sub>2</sub>O. The aqueous solution was extracted with diethyl ether and the combined organic layers were dried over MgSO<sub>4</sub> and concentrated under reduced pressure. The crude product was purified by flash column chromatography on silica gel using PE/EtOAc (80/20) as the eluent to give 251 mg of the compound **S12** (45% yield). <sup>1</sup>H NMR (300 MHz, CDCl<sub>3</sub>) δ 6.68-6.54 (m, 1H), 6.16 (d, *J* = 15.6 Hz, 1H), 3.76 (s, 6H), 2.95 (dd, *J* = 7.5, 1.2 Hz, 2H), 2.81 (d, *J* = 2.7 Hz, 2H), 2.23 (s, 3H), 2.06 (t, *J* = 2.7 Hz, 1H); <sup>13</sup>C NMR (75 MHz, CDCl<sub>3</sub>) 198.1 (C), 169.7 (C), 140.8 (CH), 135.1 (CH), 78.3 (C), 72.3 (CH), 56.8 (C), 53.2 (CH<sub>3</sub>), 35.6 (CH<sub>2</sub>), 27.2 (CH<sub>3</sub>), 23.5 (CH<sub>2</sub>); IR:  $\nu_{max}$  = 3283, 2957, 1734, 1676, 1630, 1437, 1254, 1207, 1182, 982 cm<sup>-1</sup>; HRMS (ESI) calcd. for C<sub>13</sub>H<sub>17</sub>O<sub>5</sub> [M+H]<sup>+</sup>: 253.1076, found: 253.1097.

Anhydrous ether was added to a 100 mL flask charged with compound **S12** (165 mg, 0.66 mmol) under argon. Triethylamine (199 mg, 1.96 mmol) and TBSOTf (349 mg, 1.32 mmol) was sequentially added to the resulting solution at 0 °C. The mixture was stirred at 0 °C for 2 hours and then quenched by the addition of 5 mL brine. The resulting mixture was extracted by ether and the combined organic layers were washed with brine, dried over Na<sub>2</sub>SO<sub>4</sub>, and concentrated. The crude was purified by flash column chromatography on silica gel using PE/MTBE/Et<sub>3</sub>N (10/1/0.5) as the eluent to produce the silylenol ether **S13** (85 mg, 63% yield) as a white solid. <sup>1</sup>H NMR (300 MHz, CDCl<sub>3</sub>) δ 6.01 (d, *J* = 15.0 Hz, 1H), 5.83-5.67 (m, 1H), 4.26 (d, *J* = 3.6 Hz, 2H), 3.73 (s, 6H), 2.85 (d, *J* = 7.8 Hz,

<sup>8</sup> a) E. Dunach, R. L. Halterman, K. P. C. Vollhardt, *J. Am. Chem. Soc.*, **1985**, *107*, 1664-1671 ; b) F. Cambeiro, S. Lopez, J. A. Varela, C. Saa, *Angew. Chem. Int. Ed.* **2014**, *53*, 5959-5963.

<sup>9</sup> a) F. Cambeiro, S. Lopez, J. A. Varela, C. Saa, *Angew. Chem. Int. Ed.* **2012**, *51*, 723-727; b) L. Escalante, C. Gonzalez-Rodriguez, J. A. Varela, C. Saa, *Angew. Chem. Int. Ed.* **2012**, *51*, 12316-12320.

2H), 2.77 (d,  $J = 2.4$  Hz, 2H), 2.02 (t,  $J = 2.4$  Hz, 1H), 0.95 (s, 9H), 0.15 (s, 6H);  $^{13}\text{C NMR}$  (75 MHz,  $\text{CDCl}_3$ ) 170.2 (C), 154.5 (C), 132.8 (CH), 123.9 (CH), 95.8 ( $\text{CH}_2$ ), 78.9 (C), 71.6 (CH), 57.1 (C), 52.9 ( $\text{CH}_3$ ), 34.9 ( $\text{CH}_2$ ), 25.9 ( $\text{CH}_3$ ), 22.9 ( $\text{CH}_2$ ), 18.3 (C), -4.6 ( $\text{CH}_3$ ); **IR**:  $\nu_{\text{max}} = 3287, 2956, 2931, 2860, 1741, 1595, 1437, 1292, 1207, 1179, 1027, 968, 839, 782 \text{ cm}^{-1}$ ; **HRMS** (ESI) calcd. for  $\text{C}_{19}\text{H}_{31}\text{O}_5\text{Si}$   $[\text{M}+\text{H}]^+$ : 367.1941, found: 367.1953.

$\text{ZnEt}_2$  (1M in Hexane, 0.3 mL, 0.30 mmol) and  $\text{CH}_2\text{I}_2$  (30  $\mu\text{L}$ , 0.30 mmol) was sequentially added to a flask charged with anhydrous  $\text{CH}_2\text{Cl}_2$  (5 mL) at  $-60^\circ\text{C}$  under argon. The resulting mixture was warmed to  $0^\circ\text{C}$  until a white precipitate appeared. The solution was cooled down to  $-60^\circ\text{C}$  again and silylenol ether **S13** (38 mg, 0.1 mmol) in dry  $\text{CH}_2\text{Cl}_2$  (2 mL) was added dropwise. The resulting solution was stirred at rt for 3 hours and then quenched with saturated  $\text{NH}_4\text{Cl}$ . The mixture was extracted with  $\text{Et}_2\text{O}$  and the combined organic layers were washed with brine, dried over  $\text{MgSO}_4$  and concentrated *in vacuo*. The crude mixture was purified by flash column chromatography on silica gel using (PE/MTBE 80/20) to afford substrate **1j** (18 mg, 51% yield) as a colorless oil.  $^1\text{H NMR}$  (300 MHz,  $\text{CDCl}_3$ )  $\delta$  5.44-5.34 (m, 2H), 3.73 (s, 6H), 2.81-2.78 (m, 4H), 2.00 (t,  $J = 3.0$  Hz, 1H), 0.99 (dd,  $J = 7.5, 5.5$  Hz, 2H), 0.87 (s, 9H), 0.67 (dd,  $J = 7.5, 5.5$  Hz, 2H), 0.09 (s, 6H);  $^{13}\text{C NMR}$  (75 MHz,  $\text{CDCl}_3$ ) 170.3 (C), 140.4 (CH), 119.2 (CH), 79.0 (C), 71.5 (CH), 57.1 (C), 56.6 (C), 52.9 ( $\text{CH}_3$ ), 35.0 ( $\text{CH}_2$ ), 26.0 ( $\text{CH}_3$ ), 22.8 ( $\text{CH}_2$ ), 18.1 (C), 15.9 ( $\text{CH}_2$ ), -3.4 ( $\text{CH}_3$ ); **IR**:  $\nu_{\text{max}} = 3295, 2955, 2930, 1739, 1437, 1285, 1202, 1180, 1035, 836, 777 \text{ cm}^{-1}$ ; **HRMS** (ESI) calcd. for  $\text{C}_{20}\text{H}_{32}\text{NaO}_5\text{Si}$   $[\text{M}+\text{Na}]^+$ : 403.1917, found: 403.1968.

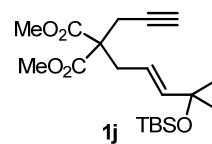

### 11. Substrate 1k:

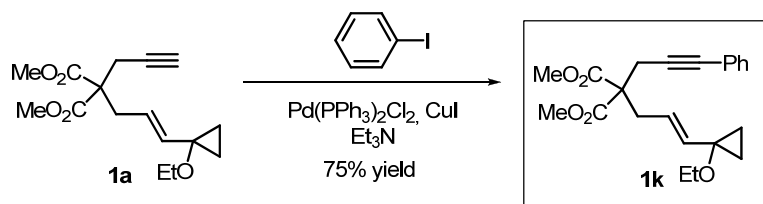

Anhydrous  $\text{Et}_3\text{N}$  (8 mL) was added to a flask charged with iodobenzene (84 mg, 0.41 mmol),  $\text{PdCl}_2(\text{PPh}_3)_2$  (12 mg, 0.017 mmol) and  $\text{CuI}$  (5.2 mg, 0.027 mmol) under argon. Compound **1a** (100 mg, 0.34 mmol) was slowly added to this mixture at rt. The resulting solution was stirred at room temperature for 6 hours then quenched with sat.  $\text{NH}_4\text{Cl}$  solution. The mixture was extracted with  $\text{Et}_2\text{O}$  and the combined organic layers were washed with brine, dried over  $\text{MgSO}_4$ . The solvent was evaporated *in vacuo* and the residue was purified by flash column chromatography (PE/ $\text{EtOAc}$  90/10) to give the desired product **1k** as a yellow oil (93 mg, 75% yield).  $^1\text{H NMR}$  (300 MHz,  $\text{CDCl}_3$ )  $\delta$  7.40-7.31 (m, 2H), 7.30-7.23 (m, 3H), 5.53-5.34 (m, 2H), 3.74 (s, 6H), 3.44 (q,  $J = 6.9$  Hz, 2H), 3.00 (s, 2H), 2.85 (d,  $J = 6.3$  Hz, 2H), 1.14 (t,  $J = 6.9$  Hz, 3H), 0.96 (dd,  $J = 7.2, 5.1$  Hz, 2H), 0.63 (dd,  $J = 7.2, 5.1$  Hz, 2H);  $^{13}\text{C NMR}$  (75 MHz,  $\text{CDCl}_3$ ) 170.5 (C), 136.5 (CH), 131.8 (CH), 128.3 (CH), 128.1 (CH), 123.3 (C), 121.3 (CH), 84.3 (C), 83.7 (C), 63.1 ( $\text{CH}_2$ ), 60.9 (C), 57.7 (C), 52.9 ( $\text{CH}_3$ ), 35.4 ( $\text{CH}_2$ ), 23.8 ( $\text{CH}_2$ ), 15.6 ( $\text{CH}_3$ ), 14.4 ( $\text{CH}_2$ ); **IR**:  $\nu_{\text{max}} = 2976, 2953, 1737, 1437, 1285, 1202, 1181, 1062, 757, 693 \text{ cm}^{-1}$ ; **HRMS** (ESI) calcd. for  $\text{C}_{22}\text{H}_{27}\text{O}_5$   $[\text{M}+\text{H}]^+$ : 371.1858, found: 371.1870.

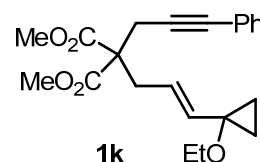

## II.2. General procedure for Au(I)-catalyzed cyclizations of 1,6-enynes.

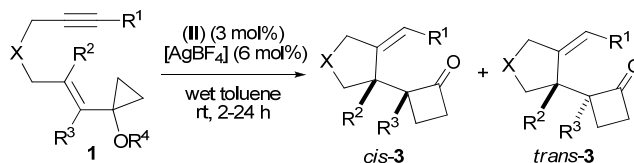

To a solution of the chiral gold(I) catalyst (2.5 mg, 0.0015 mmol, 3 mol%) and the substrates (0.05 mmol, 1 equiv.) in toluene (saturated of water or 5 mol% of water or extreme dry, 1.0 mL), AgBF<sub>4</sub> (0.6 mg, 0.003 mmol, 6 mol%) and another 0.5 ml of toluene were added sequentially. The mixture was stirred at room temperature for 2-24 hours. The reaction was monitored by <sup>1</sup>H NMR. Volatiles were removed under reduced pressure and the final product was purified by flash column chromatography (petroleum ether/ethyl acetate = 90/10 to 60/40). Enantiomeric excesses have been measured by chiral HPLC or chiral SFC. Samples of racemic compounds have been obtained *via* (acetonitrile)[(2-biphenyl)di-*tert*-butylphosphine]gold(I) hexafluoroantimonate promoted cycloadditions.

**1.** *cis*-**3a** and *trans*-**3a** were separated by preparative HPLC on sunfire silica column (19\*150 mm, 5 μm), heptane/EtOAc (92/8), 25 °C 17 mL/min, 297nm, retention times: 12.0 min (major diastereoisomers) and 13.3 min (minor diastereoisomers), (87% yield, 4.9/1 d.r.).

*cis*-**3a**. Colorless oil; <sup>1</sup>H NMR (300 MHz, CDCl<sub>3</sub>) δ 4.97 (dd, *J* = 4.2, 2.1 Hz, 1H), 4.85 (dd, *J* = 4.2, 2.1 Hz, 1H), 3.73 (s, 6H), 3.45-3.33 (m, 1H), 3.13-2.98 (m, 1H), 2.98-2.83 (m, 4H), 2.72 (dd, *J* = 13.2, 8.1 Hz, 1H), 2.25 (dq, *J* = 10.5, 5.1 Hz, 1H), 1.98 (dd, *J* = 13.2, 10.2 Hz, 1H), 1.92-1.79 (m, 1H); <sup>13</sup>C NMR (75 MHz, CDCl<sub>3</sub>) 210.4 (C), 172.1 (C), 149.7 (C), 108.0 (CH<sub>2</sub>), 63.7 (CH), 58.6 (C), 53.02 (CH<sub>3</sub>), 52.98 (CH<sub>3</sub>), 45.1 (CH<sub>2</sub>), 42.7 (CH), 41.3 (CH<sub>2</sub>), 38.3 (CH<sub>2</sub>), 16.1 (CH<sub>2</sub>); IR: *v*<sub>max</sub> = 2955, 2928, 1777, 1732, 1435, 1270, 1250, 1201, 1166, 1082, 891 cm<sup>-1</sup>; HRMS (ESI) calcd. for C<sub>14</sub>H<sub>19</sub>O<sub>5</sub> [M+H]<sup>+</sup>: 267.1232, found: 267.1233; HPLC Analysis: 99% ee, [CHIRALPAK® IC, 25 °C, 6% *i*PrOH/*n*-heptane, 1 mL/min, 210 nm, retention times: 45.0 min (major) and 47.7 min (minor)]; [α]<sub>D</sub><sup>20</sup> = -27 (*c* 0.5 in CHCl<sub>3</sub>).

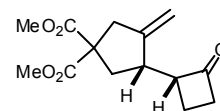

*trans*-**3a**. Colorless oil; <sup>1</sup>H NMR (300 MHz, CDCl<sub>3</sub>) δ 5.06 (dd, *J* = 4.5, 2.4 Hz, 1H), 5.00 (dd, *J* = 4.5, 2.4 Hz, 1H), 3.73 (s, 6H), 3.62-3.50 (m, 1H), 3.11-2.79 (m, 5H), 2.52 (dd, *J* = 13.2, 7.8 Hz, 1H), 2.13 (dd, *J* = 10.5, 5.1 Hz, 1H), 1.92 (dd, *J* = 13.2, 10.8 Hz, 1H), 1.84-1.70 (m, 1H); <sup>13</sup>C NMR (75 MHz, CDCl<sub>3</sub>) 210.1 (C), 172.1 (C), 149.0 (C), 108.4 (CH<sub>2</sub>), 62.7 (CH), 58.3 (C), 53.1 (CH<sub>3</sub>), 53.0 (CH<sub>3</sub>), 44.3 (CH<sub>2</sub>), 41.5 (CH), 41.1 (CH<sub>2</sub>), 37.0 (CH<sub>2</sub>), 13.9 (CH<sub>2</sub>); IR: *v*<sub>max</sub> = 2955, 2928, 1776, 1731, 1657, 1434, 1269, 1250, 1201, 1166, 1081, 891 cm<sup>-1</sup>; HRMS (ESI) calcd. for C<sub>14</sub>H<sub>19</sub>O<sub>5</sub> [M+H]<sup>+</sup>: 267.1232, found: 267.1238; HPLC Analysis: 95% ee, [CHIRALPAK® IC, 25 °C, 6% *i*PrOH/*n*-heptane, 1 mL/min, 210 nm, retention times: 23.5 min (minor) and 38.5 min (major)].

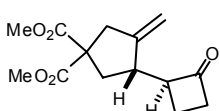

**2.** *cis*-**3a** (from OTBS substrate **1j**). (94% yield, 10/1 d.r.); colorless oil; the NMR data of compound **10j** was the same as compound **10a**. HPLC Analysis: 97% ee, [CHIRALPAK® IC, 25 °C, 6% *i*PrOH/*n*-heptane, 1 mL/min, 210 nm, retention times: 45.4 min (major) and 48.2 min (minor)].

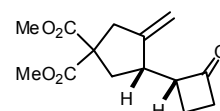

**3. *cis*-3b** (92% yield, 5.2/1 d.r.); colorless oil;  $^1\text{H NMR}$  (300 MHz,  $\text{CDCl}_3$ )  $\delta$  7.35-7.18 (m, 10H), 5.15-5.05 (m, 4H), 4.95 (dd,  $J = 4.2, 2.1$  Hz, 1H), 4.84 (dd,  $J = 4.2, 2.1$  Hz, 1H), 3.42-3.30 (m, 1H), 3.11-2.95 (m, 3H), 2.95-2.81 (m, 2H), 2.73 (dd,  $J = 13.2, 8.7$  Hz, 1H), 2.21 (dd,  $J = 10.2, 5.1$  Hz, 1H), 2.02 (dd,  $J = 13.2, 9.6$  Hz, 1H), 1.89-1.78 (m, 1H);  $^{13}\text{C NMR}$  (75 MHz,  $\text{CDCl}_3$ ) 210.4 (C), 171.3 (C), 171.2 (C), 149.6 (C), 135.5 (C), 128.7 (CH), 128.4 (CH), 128.1 (CH), 108.1 ( $\text{CH}_2$ ), 67.4 ( $\text{CH}_2$ ), 63.6 (CH), 58.9 (C), 45.1 ( $\text{CH}_2$ ), 42.7 (CH), 41.2 ( $\text{CH}_2$ ), 38.2 ( $\text{CH}_2$ ), 16.1 ( $\text{CH}_2$ ); **IR**:  $\nu_{\text{max}} = 3037, 2957, 1777, 1731, 1456, 1265, 1225, 1160, 1082, 903, 738, 697$   $\text{cm}^{-1}$ ; **HRMS** (ESI) calcd. for  $\text{C}_{26}\text{H}_{27}\text{O}_5$   $[\text{M}+\text{H}]^+$ : 419.1858, found: 419.1893; **HPLC** Analysis: major diastereoisomers: 98% ee, minor diastereoisomers: 95% ee [CHIRALPAK® IC, 25 °C, 6% *i*PrOH/*n*-heptane, 1 mL/min, 210 nm, retention times: minor diastereoisomer, 19.7 min (minor) and 27.7 min (major)]; major diastereoisomer, 30.2 min (minor) and 32.8 min (major)].

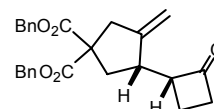

**4. *cis*-3c** (85% yield, >40/1 d.r.); colorless oil;  $^1\text{H NMR}$  (500 MHz,  $\text{CDCl}_3$ )  $\delta$  5.41 (q,  $J = 7.0$  Hz, 1H), 3.72 (s, 3H), 3.69 (s, 3H), 3.49-3.41 (m, 1H), 3.10-3.01 (m, 2H), 3.00-2.93 (m, 1H), 2.83 (dddd,  $J = 9.5, 7.5, 4.5, 2.5$  Hz, 1H), 2.78-2.69 (m, 2H), 2.17-2.08 (m, 2H), 1.84-1.75 (m, 1H), 1.60 (dd,  $J = 7.0, 2.5$  Hz, 3H);  $^{13}\text{C NMR}$  (75 MHz,  $\text{CDCl}_3$ ) 210.8 (C), 172.4 (C), 172.2 (C), 140.3 (C), 119.0 (CH), 64.0 (CH), 58.6 (C), 52.9 ( $\text{CH}_3$ ), 44.6 ( $\text{CH}_2$ ), 42.0 ( $\text{CH}_2$ ), 38.8 (CH), 37.7 ( $\text{CH}_2$ ), 15.9 ( $\text{CH}_2$ ), 14.9 ( $\text{CH}_3$ ); **IR**:  $\nu_{\text{max}} = 2955, 2929, 1776, 1733, 1450, 1435, 1289, 1261, 1201, 1172, 1084, \text{cm}^{-1}$ ; **HRMS** (ESI) calcd. for  $\text{C}_{15}\text{H}_{21}\text{O}_5$   $[\text{M}+\text{H}]^+$ : 281.1389, found: 281.1449; **HPLC** Analysis: 99% ee, [CHIRALPAK® IC, 25 °C, 6% *i*PrOH/*n*-heptane, 1 mL/min, 210 nm, retention times: 37.0 min (major) and 42.4 min (minor)];  $[\alpha]_{\text{D}}^{20} = +33$  ( $c$  0.9 in  $\text{CHCl}_3$ ). This structure was confirmed by HMQC, HMBC, COSY, and NOESY experiments.

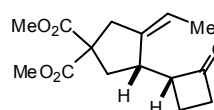

**5. *cis*-3d** (87% yield, 2.4/1 d.r.); colorless oil;  $^1\text{H NMR}$  (300 MHz,  $\text{CDCl}_3$ )  $\delta$  6.08 (s, 1H), 3.91-3.84 (m, 1H), 3.74 (s, 3H), 3.72 (s, 3H), 3.14-2.80 (m, 5H), 2.73 (dd,  $J = 13.0, 8.0$  Hz, 1H), 2.20 (dd,  $J = 10.5, 4.5$  Hz, 1H), 2.14 (dd,  $J = 14.0, 6.5$  Hz, 1H), 1.98-1.92 (m, 1H);  $^{13}\text{C NMR}$  (75 MHz,  $\text{CDCl}_3$ ) 210.0 (C), 171.4 (C), 146.1 (C), 100.0 (CH), 61.7 (CH), 59.1 (C), 53.14 ( $\text{CH}_3$ ), 53.12 ( $\text{CH}_3$ ), 45.1 ( $\text{CH}_2$ ), 41.96 ( $\text{CH}_2$ ), 41.91 (CH), 36.4 ( $\text{CH}_2$ ), 15.6 ( $\text{CH}_2$ ); **IR**:  $\nu_{\text{max}} = 2954, 1775, 1734, 1435, 1276, 1245, 1205, 1168, 1082, \text{cm}^{-1}$ ; **HRMS** (ESI) calcd. for  $\text{C}_{14}\text{H}_{18}\text{BrO}_5$   $[\text{M}+\text{H}]^+$ : 345.0338, found: 345.0363; **HPLC** Analysis: major diastereoisomers: 99% ee, [CHIRALPAK® IC, 25 °C, 30% *i*PrOH/*n*-heptane, 0.8 mL/min, 218 nm, retention times: major diastereoisomers, 10.7 min (major) and 11.9 min (minor)];  $[\alpha]_{\text{D}}^{20} = -43$  ( $c$  0.3 in  $\text{CHCl}_3$ ).

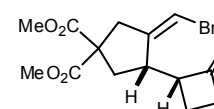

**6. Mixture of *cis*-3e (major diastereoisomer) and *trans*-3e**

(minor diastereoisomer) (84% yield, 1.3/1 d.r.); colorless oil;  $^1\text{H NMR}$  (300 MHz,  $\text{CDCl}_3$ )  $\delta$  4.99-4.95 (m, 1H, major + 1H, minor), 4.93 (t,  $J = 2.1$  Hz, 1H, minor), 4.80 (t,  $J = 1.8$  Hz, 1H, major), 3.76-3.70 (m, 6H, major + 6H, minor), 3.49-3.35 (m, 1H, major + 1H, minor), 3.21-2.84 (m, 3H, major + 3H, minor), 2.83-2.69 (m, 1H, major + 1H, minor), 2.53-2.22 (m, 2H, major + 2H, minor), 2.05 (q,  $J = 10.8, 5.1$  Hz, 1H, major + 1H, minor), 1.90-1.75 (m, 1H, major + 1H, minor), 1.15 (s, 3H, minor), 1.14 (s, 3H, major);  $^{13}\text{C NMR}$  (75 MHz,  $\text{CDCl}_3$ ) 210.8 (C, major), 210.4 (C, minor), 172.44 (C, major), 172.38 (C, minor), 154.42 (C, minor), 154.38 (C, major), 107.6 ( $\text{CH}_2$ , minor), 107.3 ( $\text{CH}_2$ , major), 69.2 (CH, major), 68.9 (CH, minor), 57.7 (C, major + minor), 53.1 ( $\text{CH}_3$ , major), 53.0 ( $\text{CH}_3$ , minor), 45.6 ( $\text{CH}_2$ , major), 45.5 (C, major + minor), 44.4 ( $\text{CH}_2$ , major), 44.1 ( $\text{CH}_2$ , minor), 43.8 ( $\text{CH}_2$ , minor), 42.1 ( $\text{CH}_2$ , major), 41.7 ( $\text{CH}_2$ , minor), 25.9 ( $\text{CH}_3$ , minor), 24.3 ( $\text{CH}_3$ , major), 14.0 ( $\text{CH}_2$ , major), 13.7 ( $\text{CH}_2$ , minor); **IR**:  $\nu_{\text{max}} = 2957, 1776, 1734, 1435, 1261, 1244, 1200,$

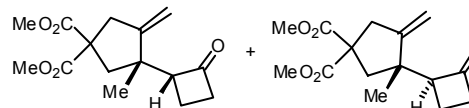

1174, 1081, 897  $\text{cm}^{-1}$ ; **HRMS** (ESI) calcd. for  $\text{C}_{15}\text{H}_{21}\text{O}_5$   $[\text{M}+\text{H}]^+$ : 281.1389, found: 281.1389; **HPLC** Analysis: major diastereoisomer: 89% ee, minor diastereoisomer: 92% ee [CHIRALPAK® IC, 25 °C, 6% *i*PrOH/*n*-heptane, 1 mL/min, 210 nm, retention times: minor diastereoisomer, 18.2 min (minor) and 32.2 min (major)]; major diastereoisomer, 23.2 min (major) and 26.7 min (minor)].

**7.** *cis*-**3f** and *trans*-**3f** was separated by prepare HPLC on sunfire silica column (19\*150 mm, 5  $\mu\text{m}$ ), heptane/EtOAc (95/5), 25 °C 17 mL/min, 305 nm, retention times: 19.3 min (major diastereoisomer) and 21.4 min (minor diastereoisomer); (80% yield, 4.5/1 d.r.).

*cis*-**3f**. Colorless oil;  $^1\text{H}$  NMR (300 MHz,  $\text{CDCl}_3$ )  $\delta$  5.06 (bs, 1H), 4.83 (bs, 1H), 3.73 (s, 3H), 3.72 (s, 3H), 3.14-2.80 (m, 5H), 2.69-2.56 (m, 1H), 2.10-1.97 (m, 1H), 1.92-1.69 (m, 2H), 1.19 (s, 3H);  $^{13}\text{C}$  NMR (75 MHz,  $\text{CDCl}_3$ ) 215.3 (C), 171.8 (C), 171.7 (C), 148.0 (C), 110.0 ( $\text{CH}_2$ ), 66.9 (C), 58.4 (C), 53.0 ( $\text{CH}_3$ ), 45.6 (CH), 43.2 ( $\text{CH}_2$ ), 42.8 ( $\text{CH}_2$ ), 36.4 ( $\text{CH}_2$ ), 22.8 ( $\text{CH}_2$ ), 19.2 ( $\text{CH}_3$ ); **IR**:  $\nu_{\text{max}}$  = 2957, 1776, 1734, 1436, 1271, 1204, 1167, 1062  $\text{cm}^{-1}$ ; **HRMS** (ESI) calcd. for  $\text{C}_{15}\text{H}_{21}\text{O}_5$   $[\text{M}+\text{H}]^+$ : 281.1389, found: 281.1470; **HPLC** Analysis: 87% ee, [CHIRALPAK® IC, 25 °C, 2% *i*PrOH/*n*-heptane, 1 mL/min, 210 nm, retention times: 46.2 min (minor) and 50.4 min (major)];  $[\alpha]_{\text{D}}^{20}$  = +12 (*c* 0.4 in  $\text{CHCl}_3$ ).

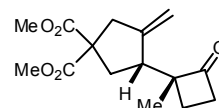

*trans*-**3f**. Colorless oil;  $^1\text{H}$  NMR (300 MHz,  $\text{CDCl}_3$ )  $\delta$  5.14 (bs, 1H), 5.08 (bs, 1H), 3.73 (s, 3H), 3.72 (s, 3H), 3.12-2.78 (m, 5H), 2.68-2.54 (m, 1H), 2.08-1.88 (m, 2H), 1.80-1.68 (m, 1H), 1.24 (s, 3H);  $^{13}\text{C}$  NMR (75 MHz,  $\text{CDCl}_3$ ) 213.5 (C), 171.9 (C), 171.8 (C), 147.1 (C), 111.0 ( $\text{CH}_2$ ), 66.2 (C), 58.4 (C), 53.0 ( $\text{CH}_3$ ), 52.9 ( $\text{CH}_3$ ), 45.6 (CH), 43.0 ( $\text{CH}_2$ ), 42.4 ( $\text{CH}_2$ ), 36.2 ( $\text{CH}_2$ ), 23.0 ( $\text{CH}_2$ ), 18.1 ( $\text{CH}_3$ ); **IR**:  $\nu_{\text{max}}$  = 2957, 1776, 1734, 1435, 1271, 1204, 1167, 1062  $\text{cm}^{-1}$ ; **HRMS** (ESI) calcd. for  $\text{C}_{15}\text{H}_{21}\text{O}_5$   $[\text{M}+\text{H}]^+$ : 281.1389, found: 281.1465. **HPLC** Analysis: 75% ee, [CHIRALPAK® IC, 25 °C, 2% *i*PrOH/*n*-heptane, 1 mL/min, 210 nm, retention times: 38.0 min (minor) and 40.3 min (major)];  $[\alpha]_{\text{D}}^{20}$  = -17 (*c* 0.5 in  $\text{CHCl}_3$ ).

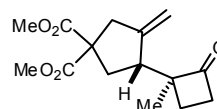

**8.** *cis*-**3g** and *trans*-**3g** were separated by chiral HPLC, [CHIRALPAK® IC, 25 °C, 35% *i*PrOH/*n*-heptane, 0.8 mL/min, 222 nm, retention times: minor diastereoisomer, 36.6 min (enantiomers I), 41.8 min (enantiomers II); major diastereoisomer, 48.7 min; (82% yield, 2.0/1 d.r.); pale yellow oil;  $^1\text{H}$  NMR (300 MHz,  $\text{CDCl}_3$ ) (major)  $\delta$  8.07-7.96 (m, 4H), 7.76-7.68 (m, 2H), 7.65-7.55 (m, 4H), 4.84 (d,  $J$  = 1.8 Hz, 1H), 4.79 (dd,  $J$  = 1.8 Hz, 1H), 3.41-3.26 (m, 2H), 3.17-2.85 (m, 5H), 2.60-2.47 (m, 1H), 2.27 (dq,  $J$  = 10.5, 4.8 Hz, 1H), 1.87-1.72 (m, 1H); (minor)  $\delta$  8.07-8.00 (m, 4H), 7.77-7.68 (m, 2H), 7.61 (t,  $J$  = 7.5 Hz, 4H), 5.01 (d,  $J$  = 2.1 Hz, 1H), 4.91 (d,  $J$  = 2.1 Hz, 1H), 3.61-3.49 (m, 1H), 3.28-3.18 (m, 2H), 3.15-2.99 (m, 2H), 2.93-2.77 (m, 1H), 2.68 (dd,  $J$  = 14.7, 8.1 Hz, 1H), 2.40 (dd,  $J$  = 15.0, 10.2 Hz, 1H), 2.15 (dd,  $J$  = 10.5, 5.1 Hz, 1H), 1.80-1.65 (m, 1H);  $^{13}\text{C}$  NMR (75 MHz,  $\text{CDCl}_3$ ) 209.4 (C, major), 208.8 (C, minor), 147.6 (C, major), 146.7 (C, minor), 136.6 (C, major), 136.0 (C, minor), 135.0 (CH, major), 134.8 (CH, minor), 131.5 (CH, major), 131.4 (CH, minor), 128.96 (CH, major + minor), 109.2 ( $\text{CH}_2$ , minor), 108.5 ( $\text{CH}_2$ , major), 91.6 (C, major), 91.1 (C, minor), 63.2 (CH, major), 62.1 (CH, minor), 45.3 ( $\text{CH}_2$ , major), 44.6 ( $\text{CH}_2$ , minor), 43.7 (CH, major), 42.2 (CH, minor), 38.7 ( $\text{CH}_2$ , minor), 38.4 ( $\text{CH}_2$ , major), 35.9 ( $\text{CH}_2$ , major), 34.4 ( $\text{CH}_2$ , minor), 16.5 ( $\text{CH}_2$ , major), 13.9 ( $\text{CH}_2$ , minor); **IR** (major):  $\nu_{\text{max}}$  = 2962, 2924, 1774, 1447, 1328, 1310, 1143, 1077, 1024, 754, 730, 687  $\text{cm}^{-1}$ ; **HRMS** (ESI) (major) calcd. for  $\text{C}_{22}\text{H}_{23}\text{O}_5\text{S}_2$   $[\text{M}+\text{H}]^+$ : 431.0987, found: 431.1036; **HPLC** Analysis: major diastereoisomer: 74% ee, [CHIRALPAK® ID, 35 °C, 35% *i*PrOH/*n*-heptane, 0.7 mL/min, 222 nm, retention times: 45.7 min

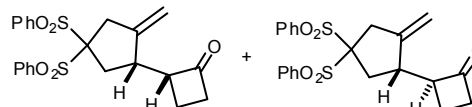

(minor) and 50.3 min (major)]; minor diastereoisomer: 95% ee [CHIRALPAK® ID, 35 °C, 35% *i*PrOH/*n*-heptane, 0.7 mL/min, 222 nm, retention times: 34.9 min (minor) and 45.1 min (major)].

**9. *cis*-3h** (77% yield, 4.1/1 d.r.); light yellow oil;  $^1\text{H NMR}$  (300 MHz,  $\text{CDCl}_3$ )  $\delta$  8.11 (d,  $J = 7.5$  Hz, 2H), 7.92 (d,  $J = 7.5$  Hz, 2H), 7.78-7.70 (m, 1H), 7.69-7.65 (m, 1H), 7.62 (t,  $J = 7.5$  Hz, 2H), 7.54 (t,  $J = 7.5$  Hz, 2H), 5.16-5.03 (m, 1H), 3.62-3.45 (m, 2H), 3.11-2.68 (m, 6H), 2.13 (dq,  $J = 10.5, 5.0$  Hz, 1H), 1.80-1.67 (m, 1H), 1.44 (dd,  $J = 7.0, 2.5$  Hz, 3H);  $^{13}\text{C NMR}$  (75 MHz,  $\text{CDCl}_3$ ) 210.3 (C), 137.9 (C), 137.2 (C), 136.4 (C), 134.8 (CH), 134.7 (CH), 131.5 (CH), 131.2 (CH), 128.9 (CH), 120.2 (CH), 91.7 (C), 63.5 (CH), 44.5 (CH<sub>2</sub>), 39.5 (CH), 39.0 (CH<sub>2</sub>), 35.1 (CH<sub>2</sub>), 16.4 (CH<sub>2</sub>), 15.2 (CH<sub>3</sub>); **IR**:  $\nu_{\text{max}} = 2923, 1774, 1448, 1329, 1311, 1144, 1077, 753, 725, 688$  cm<sup>-1</sup>; **HRMS** (ESI) calcd. for C<sub>23</sub>H<sub>25</sub>O<sub>5</sub>S<sub>2</sub> [M+H]<sup>+</sup>: 445.1143, found: 445.1204; **HPLC** Analysis: 91% ee, [CHIRALPAK® IC, 35 °C, 40% EtOH/*n*-heptane, 0.7 mL/min, 222 nm, retention times: 30.8 min (major) and 38.9 min (minor)];  $[\alpha]_{\text{D}}^{20} = +10$  (c 0.6 in  $\text{CHCl}_3$ ).

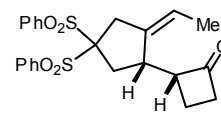

**10.** Mixture of *cis*-3i (major diastereoisomer) and *trans*-3i (minor diastereoisomer). (84% yield, 3.9/1 d.r.); colorless oil;  $^1\text{H NMR}$  (300 MHz,  $\text{CDCl}_3$ )  $\delta$  7.53-7.45 (m, 4H, major + 4H, minor), 7.38-7.31 (m, 4H, major + 4H, minor), 7.31-7.24 (m, 2H, major + 2H, minor), 5.00 (dd,  $J = 4.2, 2.4$  Hz, 1H, minor), 4.94 (m, 1H, major + 1H, minor), 4.84 (dd,  $J = 4.2, 2.4$  Hz, 1H, major), 3.80-3.64 (m, 4H, major + 4H, minor), 3.62-3.51 (m, 1H, minor), 3.43-3.31 (m, 1H, major), 3.10-2.94 (m, 1H, major + 1H, minor), 2.94-2.74 (m, 2H, major + 2H, minor), 2.55-1.96 (m, 4H, major + 4H, minor), 1.91-1.67 (m, 1H, major + 1H, minor), 1.31-1.19 (m, 1H, major + 1H, minor);  $^{13}\text{C NMR}$  (75 MHz,  $\text{CDCl}_3$ ) 211.1 (C, major), 210.8 (C, minor), 151.4 (C, major), 150.8 (C, minor), 142.4 (C, major), 141.8 (C, minor), 141.3 (C, major), 140.7 (C, minor), 128.6, 128.55, 128.46, 128.1, 127.1, 126.8, 126.6 (10 CH, major + 10 CH, minor), 108.0 (CH<sub>2</sub>, minor), 107.9 (CH<sub>2</sub>, major), 101.4 (C, major + minor), 71.0 (CH<sub>2</sub>, minor), 70.9 (CH<sub>2</sub>, major), 69.5 (CH<sub>2</sub>, minor), 69.4 (CH<sub>2</sub>, major), 64.8 (CH, major), 63.0 (CH, minor), 45.0 (CH<sub>2</sub>, major), 44.4 (CH<sub>2</sub>, minor), 42.0 (CH, major), 41.3 (CH<sub>2</sub>, major), 40.9 (CH, minor), 40.8 (CH<sub>2</sub>, minor), 40.4 (C, major), 40.0 (C, minor), 37.1 (CH<sub>2</sub>, major), 35.9 (CH<sub>2</sub>, minor), 16.0 (CH<sub>2</sub>, major), 13.9 (CH<sub>2</sub>, minor); **IR**:  $\nu_{\text{max}} = 3061, 2956, 2865, 1776, 1491, 1451, 1259, 1198, 1101, 1086, 1028, 1001, 771, 749, 708, 696$  cm<sup>-1</sup>; **HRMS** (ESI) calcd. for C<sub>25</sub>H<sub>27</sub>O<sub>3</sub> [M+H]<sup>+</sup>: 375.1960, found: 375.1969; **SFC** Analysis: major diastereoisomers: 87% ee, minor diastereoisomers: 85% ee [CHIRAL SFC AD-H, 30 °C, 5% MeOH/CO<sub>2</sub>, 4 mL/min, pressure: 150 bar, 214 nm, retention times: minor diastereoisomer, 8.3 min (major) and 9.5 min (minor)]; major diastereoisomer, 7.0 min (major) and 14.3 min (minor)].

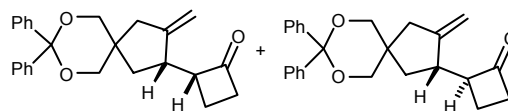

**11. S15.** 88% yield; colorless oil;  $^1\text{H NMR}$  (300 MHz,  $\text{CDCl}_3$ )  $\delta$  7.39-7.26 (m, 5H), 6.70 (dt,  $J = 15.6, 7.8$  Hz, 1H), 6.20 (d,  $J = 15.6$  Hz, 1H), 3.78 (s, 6H), 3.03 (s, 2H), 2.99 (d,  $J = 7.8$  Hz, 2H), 2.55 (q,  $J = 7.5$  Hz, 2H), 1.07 (t,  $J = 7.5$  Hz, 3H);  $^{13}\text{C NMR}$  (75 MHz,  $\text{CDCl}_3$ ) 200.7 (C), 170.0 (C), 139.7 (CH), 134.0 (CH), 131.8 (CH), 128.4 (CH), 128.3 (CH), 123.0 (C), 84.4 (C), 83.7 (C), 57.2 (C), 53.2 (CH<sub>3</sub>), 35.8 (CH<sub>2</sub>), 33.5 (CH<sub>2</sub>), 24.4 (CH<sub>2</sub>), 8.1 (CH<sub>3</sub>); **HRMS** (ESI) calcd. for C<sub>20</sub>H<sub>23</sub>O<sub>5</sub> [M+H]<sup>+</sup>: 343.1545, found: 343.1554.

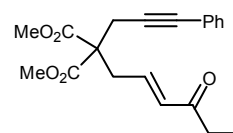

## 12. Synthesis of compound 4.

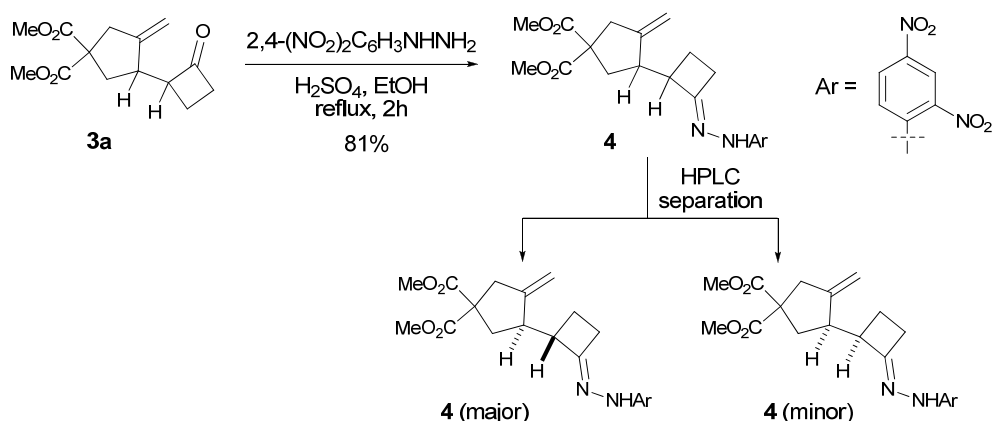

To a solution of **3a** (15 mg, 0.056 mmol) in EtOH (2 mL) was added (2,4-dinitrophenyl)hydrazine (17 mg, 0.085 mmol) and 0.5 N H<sub>2</sub>SO<sub>4</sub> (0.056 mL, 0.028 mmol). The red reaction mixture was heated to reflux and stirred at this temperature for 4 hours. The EtOH was removed under reduced pressure and the crude mixture was purified by flash column chromatography (heptanes/EtOAc 80/20, R<sub>f</sub> = 0.28) to afford **4** as a mixture of two diastereoisomers (20 mg, 81% yield). The two diastereoisomers were separated by preparative HPLC<sup>10</sup> to produce the two diastereoisomers **4a** (major) and **4b** (minor).

**4a** (major diastereoisomer). <sup>1</sup>H NMR (300 MHz, CDCl<sub>3</sub>) δ 10.74 (bs, 1H), 9.12 (d, *J* = 2.7 Hz, 1H), 8.32 (dd, *J* = 9.6, 2.1 Hz, 1H), 7.85 (d, *J* = 9.6 Hz, 1H), 5.00 (dd, *J* = 4.2, 2.1 Hz, 1H), 4.90 (dd, *J* = 4.2, 2.1 Hz, 1H), 3.75 (s, 6H), 3.53-3.40 (m, 1H), 3.04-2.89 (m, 5H), 2.79 (d, *J* = 13.2, 7.8 Hz, 1H), 2.43-2.31 (m, 1H), 2.16-1.97 (m, 2H); <sup>13</sup>C NMR (75 MHz, CDCl<sub>3</sub>) 172.2 (C), 162.9 (C), 149.7 (C), 145.0 (C), 130.3 (CH), 129.6 (C), 123.7 (CH), 116.4 (CH), 108.1 (CH<sub>2</sub>), 58.6 (C), 53.1 (CH<sub>3</sub>), 50.6 (CH), 44.8 (CH), 41.6 (CH<sub>2</sub>), 38.7 (CH<sub>2</sub>), 29.1 (CH<sub>2</sub>), 20.1 (CH<sub>2</sub>); IR:  $\nu_{\text{max}}$  = 2956, 2924, 2853, 1733, 1618, 1592, 1519, 1426, 1337, 1312, 1273, 1136, 1072, 759 cm<sup>-1</sup>; HRMS (ESI) calcd. for C<sub>20</sub>H<sub>23</sub>N<sub>4</sub>O<sub>8</sub> [M+H]<sup>+</sup>: 447.1516, found: 447.1544; [α]<sub>D</sub><sup>20</sup> = -12 (*c* 0.1 in CHCl<sub>3</sub>); [α]<sub>D</sub><sup>20</sup> = -12 (*c* 0.1 in CHCl<sub>3</sub>).

**4b** (minor diastereoisomer). <sup>1</sup>H NMR (300 MHz, CDCl<sub>3</sub>) δ 10.73 (bs, 1H), 9.12 (d, *J* = 2.7 Hz, 1H), 8.31 (dd, *J* = 9.6, 2.1 Hz, 1H), 7.86 (d, *J* = 9.6 Hz, 1H), 5.17 (dd, *J* = 4.2, 2.1 Hz, 1H), 5.07 (dd, *J* = 4.2, 2.1 Hz, 1H), 3.75 (s, 6H), 3.68-3.55 (m, 1H), 3.08-2.88 (m, 5H), 2.70-2.59 (m, 1H), 2.34-2.19 (m, 1H), 2.06-1.91 (m, 2H); <sup>13</sup>C NMR (75 MHz, CDCl<sub>3</sub>) 172.1 (C), 163.0 (C), 149.2 (C), 145.0 (C), 130.2 (CH + C), 123.7 (CH), 116.4 (CH), 108.8 (CH<sub>2</sub>), 58.3 (C), 53.1 (CH<sub>3</sub>), 49.7 (CH), 43.6 (CH), 41.7 (CH<sub>2</sub>), 37.1 (CH<sub>2</sub>), 29.1 (CH<sub>2</sub>), 18.0 (CH<sub>2</sub>); IR:  $\nu_{\text{max}}$  = 2955, 2923, 2853, 1733, 1618, 1592, 1519, 1337, 1312, 1272, 1137, 1072, 759 cm<sup>-1</sup>; HRMS (ESI) calcd. for C<sub>20</sub>H<sub>23</sub>N<sub>4</sub>O<sub>8</sub> [M+H]<sup>+</sup>: 447.1516, found: 447.1566; [α]<sub>D</sub><sup>20</sup> = -21 (*c* 0.2 in CHCl<sub>3</sub>).

<sup>10</sup> HPLC conditions : Heptane/ Ethyl acetate 90/10-65/35, 14 ml/min, retention times 21.2min and 24.1 min.

### 13. Synthesis of the tricyclic compounds.

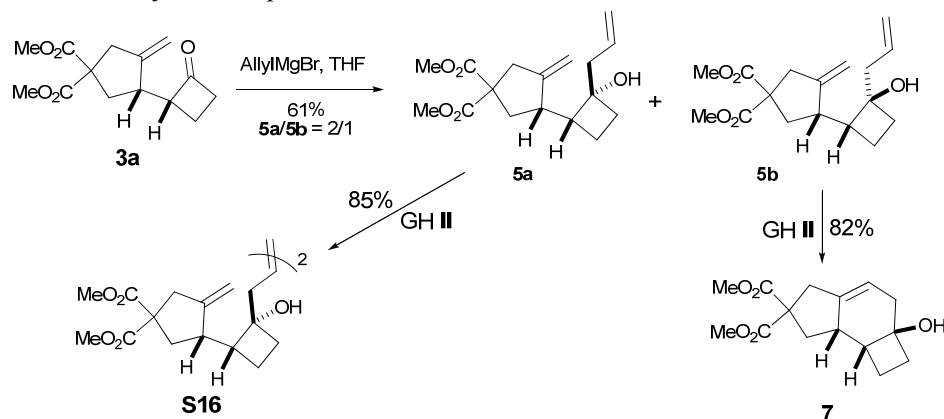

Compounds **5a** and **5b**. Allylmagnesium bromide (1.0M in THF) (0.18 mL, 0.18 mmol) was added to a solution of **3a** (25 mg, 0.09 mmol) in THF 4 mL at  $-78\text{ }^{\circ}\text{C}$  under argon. The resulting mixture was warmed to rt and stirred at this temperature for 1.5 hours. Water (3mL) was added, the mixture was extracted with EtOAc and the combined organic layers were dried over  $\text{MgSO}_4$  and concentrated in *vacuo*. The crude was purified by flash column chromatography on silica gel using PE/EtOAc (85/15) as eluent, to provide the two diastereoisomers **5a** (10 mg) and **5b** (7 mg) in 61% overall yield.

**5a** (major).  $^1\text{H NMR}$  (300 MHz,  $\text{CDCl}_3$ )  $\delta$  5.87-5.77 (m, 1H), 5.20-5.13 (m, 2H), 4.85 (d,  $J = 0.9$  Hz, 1H), 4.81 (d,  $J = 0.9$  Hz, 1H), 3.73 (s, 3H), 3.72 (s, 3H), 2.96 (d,  $J = 9.6$  Hz, 1H), 2.90 (dd,  $J = 9.6, 1.2$  Hz, 1H), 2.86-2.78 (m, 1H), 2.70 (dd,  $J = 8.1, 5.1$  Hz, 1H), 2.34 (dq,  $J = 8.1, 4.5$  Hz, 2H), 2.23-2.16 (m, 1H), 2.06-1.98 (m, 1H), 1.97-1.84 (m, 4H);  $^{13}\text{C NMR}$  (75 MHz,  $\text{CDCl}_3$ ) 172.7 (C), 151.6 (C), 133.3 (CH), 119.3 ( $\text{CH}_2$ ), 106.8 ( $\text{CH}_2$ ), 76.5 (C), 58.7 (C), 52.94 ( $\text{CH}_3$ ), 52.88 ( $\text{CH}_3$ ), 48.6 (CH), 46.8 ( $\text{CH}_2$ ), 46.3 (CH), 41.2 ( $\text{CH}_2$ ), 39.5 ( $\text{CH}_2$ ), 32.5 ( $\text{CH}_2$ ), 20.8 ( $\text{CH}_2$ ); **IR**:  $\nu_{\text{max}} = 3353, 2957, 2923, 1735, 1640, 1435, 1260, 1093, 1023, 801\text{ cm}^{-1}$ ; **HRMS** (ESI) calcd. for  $\text{C}_{17}\text{H}_{25}\text{O}_5$   $[\text{M}+\text{H}]^+$ : 309.1702, found: 309.1720.

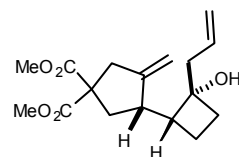

**5b** (minor).  $^1\text{H NMR}$  (500 MHz,  $\text{CDCl}_3$ )  $\delta$  5.96-5.87 (m, 1H), 5.25-5.18 (m, 2H), 4.86 (d,  $J = 1.5$  Hz, 1H), 4.79 (d,  $J = 1.5$  Hz, 1H), 3.73 (s, 3H), 3.72 (s, 3H), 3.01 (dq,  $J = 16.5, 2.5$  Hz, 1H), 2.88 (dd,  $J = 16.5, 1.0$  Hz, 1H), 2.66-2.58 (m, 2H), 2.47 (dd,  $J = 13.5, 6.5$  Hz, 1H), 2.32-2.24 (m, 2H), 2.07-1.98 (m, 3H), 1.96-1.88 (m, 1H), 1.79-1.71 (m, 1H);  $^{13}\text{C NMR}$  (75 MHz,  $\text{CDCl}_3$ ) 175.5 (C), 151.1 (C), 133.4 (CH), 119.5 ( $\text{CH}_2$ ), 107.2 ( $\text{CH}_2$ ), 75.8 (C), 59.2 (C), 52.9 ( $\text{CH}_3$ ), 52.8 ( $\text{CH}_3$ ), 43.5 (CH), 41.1 ( $\text{CH}_2$ ), 38.9 (CH), 38.8 ( $\text{CH}_2$ ), 33.1 ( $\text{CH}_2$ ), 19.3 ( $\text{CH}_2$ ); **IR**:  $\nu_{\text{max}} = 3353, 2957, 2923, 1735, 1640, 1435, 1260, 1093, 1023, 801\text{ cm}^{-1}$ ; **HRMS** (ESI) calcd. for  $\text{C}_{17}\text{H}_{25}\text{O}_5$   $[\text{M}+\text{H}]^+$ : 309.1702, found: 309.1709.

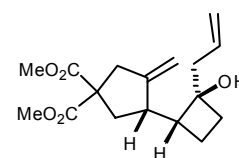

**14. Compound 7.** To a stirring solution of **5b** (5 mg, 0.016 mmol) in anhydrous  $\text{CH}_2\text{Cl}_2$  (1.6 mL) was added the Hoveyda-Grubbs Catalyst 2nd Generation (1 mg, 0.0016 mmol) under argon at room temperature. The resulting solution was stirred at  $40\text{ }^{\circ}\text{C}$  for 4 hours and the solvent was removed under reduced pressure. The crude was purified by flash column chromatography on silica gel using PE/EtOAc (60/40) as eluent, to provide compound **7** (3.8 mg, 82% yield).  $^1\text{H NMR}$  (300 MHz,  $\text{CDCl}_3$ )  $\delta$  5.66 (d,  $J = 2.0$  Hz, 1H), 3.73 (s, 3H), 3.72 (s, 3H), 3.10 (d,  $J = 17.0$  Hz, 1H), 2.84 (d,  $J = 17.0$  Hz, 1H), 2.73-2.66 (m, 1H), 2.66-2.55 (m, 1H), 2.43 (dd,  $J = 12.5, 7.0$  Hz, 1H), 2.29 (dd,  $J = 15.5, 7.0$  Hz, 1H), 2.07-1.94 (m, 2H), 1.90-1.81 (m, 1H), 1.77-1.60 (m, 3H);  $^{13}\text{C NMR}$  (75 MHz,  $\text{CDCl}_3$ ) 172.3 (C), 141.9 (C), 116.2 (CH), 75.4 (C), 59.9 (C), 52.95 ( $\text{CH}_3$ ), 52.86 ( $\text{CH}_3$ ), 46.3 (CH), 40.8 (CH), 39.3

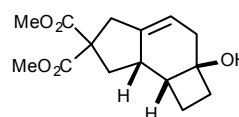



(CH<sub>2</sub>), 38.0 (CH<sub>2</sub>), 36.2 (CH<sub>2</sub>), 35.0 (CH<sub>2</sub>), 13.4 (CH<sub>2</sub>); **IR**:  $\nu_{max}$  = 3373, 2956, 2926, 1731, 1668, 1435, 1283, 1256, 1168, 1093, 1015, 798, 754 cm<sup>-1</sup>; **HRMS** (ESI) calcd. for C<sub>15</sub>H<sub>21</sub>O<sub>5</sub> [M+H]<sup>+</sup>: 281.1389, found: 281.1392; [ $\alpha$ ]<sub>D</sub><sup>20</sup> = -10 (*c* 0.45 in CHCl<sub>3</sub>).

**15. Compound S16.** Compound **5a** was subjected to the ruthenium-catalyzed ring-closing metathesis reaction according to the same procedure used for **5b**.

The dimer of compound **S16** was obtained in 86% yield. **<sup>1</sup>H NMR** (500 MHz, CDCl<sub>3</sub>)  $\delta$  5.53-5.45 (m, 2H), 4.85 (bs, 2H), 4.81 (bs, 2H), 3.72 (bs, 12H), 2.99-2.85 (m, 4H), 2.85-2.76 (m, 2H), 2.69 (dd, *J* = 13.0, 8.0 Hz, 2H), 2.40-2.27 (m, 4H), 2.22-2.14 (m, 2H), 2.06-1.97 (m, 2H), 1.95-1.84 (m, 8H); **IR**:  $\nu_{max}$  = 3464, 2952, 2923, 2852, 1731, 1664, 1435, 1258, 1202, 1168, 1071, 1016, 886, 799 cm<sup>-1</sup>; **HRMS** (ESI) calcd. for C<sub>32</sub>H<sub>45</sub>O<sub>10</sub> [M+H]<sup>+</sup>: 589.3013, found: 589.3073.

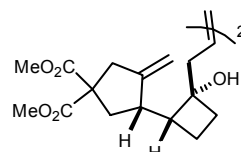

**16. Synthesis of the compound 8.**

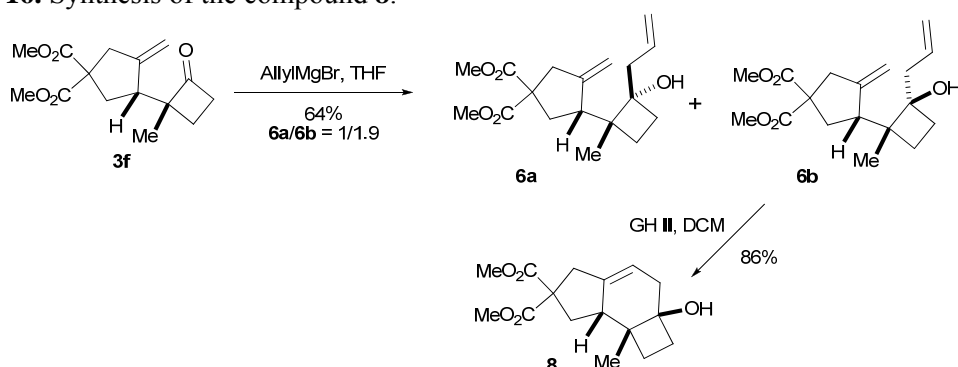

Compound **6a/6b** were prepared according to the same procedure used for the synthesized of compound **5a** and **5b**. Only the diastereoisomer **6b** was characterized and used for the next step (5 mg, 44% yield). **<sup>1</sup>H NMR** (500 MHz, CDCl<sub>3</sub>)  $\delta$  5.98-5.83 (m, 1H), 5.24-5.17 (m, 2H), 4.92 (d, *J* = 1.5 Hz, 1H), 4.76 (d, *J* = 1.5 Hz, 1H), 3.73 (s, 3H), 3.72 (s, 3H), 2.88-2.84 (m, 2H), 2.62-2.55 (m, 2H), 2.35-2.28 (m, 1H), 2.06-2.00 (m, 1H), 1.96-1.88 (m, 2H), 1.64-1.59 (m, 2H), 1.14 (s, 3H), 0.95-0.86 (m, 1H); **<sup>13</sup>C NMR** (75 MHz, CDCl<sub>3</sub>) 172.3 (C), 172.0 (C), 150.2 (C), 134.1 (CH), 119.3 (CH<sub>2</sub>), 107.9 (CH<sub>2</sub>), 76.2 (C), 59.2 (C), 52.94 (CH<sub>3</sub>), 52.88 (CH<sub>3</sub>), 49.4 (C), 47.6 (CH), 43.0 (CH<sub>2</sub>), 40.1 (CH<sub>2</sub>), 36.0 (CH<sub>2</sub>), 31.7 (CH<sub>2</sub>), 27.6 (CH<sub>2</sub>), 14.7 (CH<sub>3</sub>); **IR**:  $\nu_{max}$  = 3519, 2952, 2928, 1735, 1457, 1435, 1269, 1250, 1203, 1167, 1068, 881 cm<sup>-1</sup>; **HRMS** (ESI) calcd. for C<sub>18</sub>H<sub>26</sub>NaO<sub>5</sub> [M+ Na]<sup>+</sup>: 345.1678, found: 345.1718.

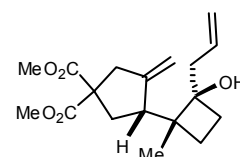

**17. Compound 8** was synthesized according to the same procedure used for the synthesized of compound **7** (3.9 mg, 86% yield). **<sup>1</sup>H NMR** (500 MHz, CDCl<sub>3</sub>)

$\delta$  5.68-5.64 (m, 1H), 3.73 (s, 3H), 3.72 (s, 3H), 3.10 (d, *J* = 17.0 Hz, 1H), 2.85 (dm, *J* = 17.0 Hz, 1H), 2.47 (dd, *J* = 11.0, 6.0 Hz, 1H), 2.40-2.35 (m, 1H), 2.31 (dd, *J* = 15.0, 7.0 Hz, 1H), 2.05-1.95 (m, 2H), 1.88-1.77 (m, 2H), 1.74-1.68 (m, 2H), 1.18 (s, 3H); **<sup>13</sup>C NMR** (125 MHz, CDCl<sub>3</sub>) 172.5 (C), 143.7 (C), 116.0 (CH), 60.0 (C), 53.0 (CH<sub>3</sub>), 52.9 (CH<sub>3</sub>), 47.6 (CH), 39.6 (CH<sub>2</sub>), 38.4 (CH<sub>2</sub>), 35.3 (CH<sub>2</sub>), 33.1 (CH<sub>2</sub>), 22.1 (CH<sub>2</sub>), 20.2 (CH<sub>3</sub>); **IR**:  $\nu_{max}$  = 3396, 2956, 2927, 1730, 1670, 1435, 1283, 1248, 1170, 1073, 1024, 907, 799, 729 cm<sup>-1</sup>; **HRMS** (ESI) calcd. for C<sub>16</sub>H<sub>23</sub>O<sub>5</sub> [M+H]<sup>+</sup>: 295.1545, found: 295.1654; [ $\alpha$ ]<sub>D</sub><sup>20</sup> = -6 (*c* 0.15 in CHCl<sub>3</sub>).

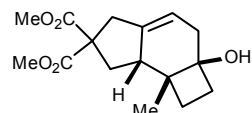

### III. NMR Spectra ( $^1\text{H}$ , $^{13}\text{C}$ )

#### $^1\text{H}$ NMR (300 MHz, $\text{CDCl}_3$ ) (1a):

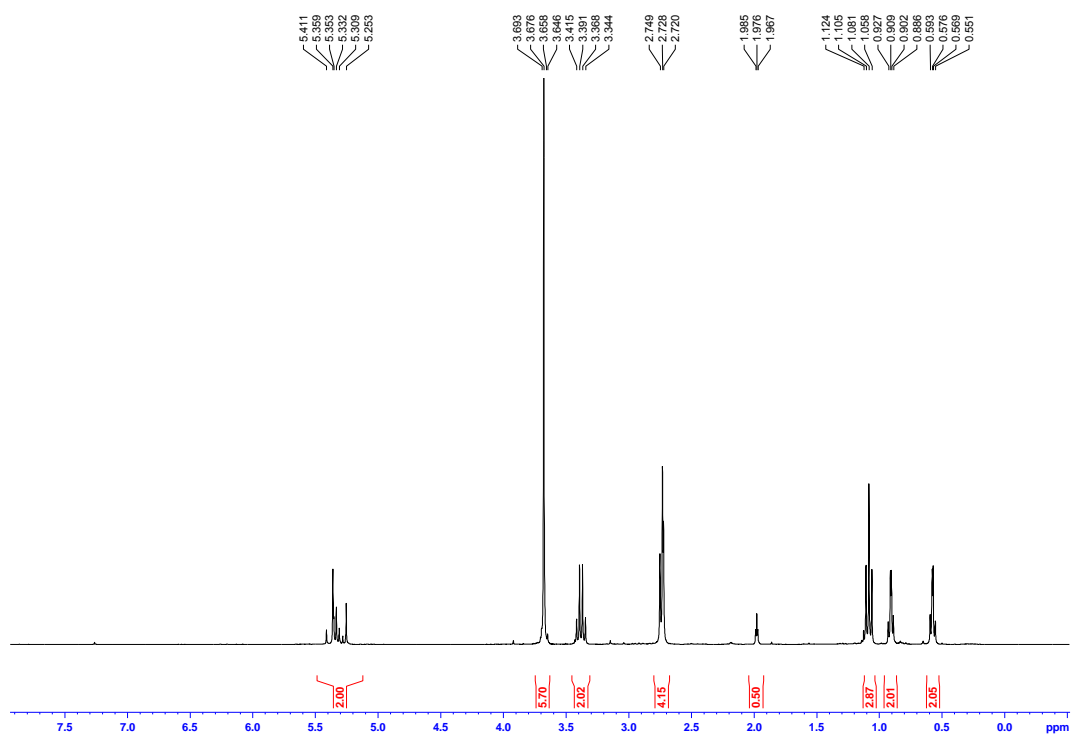

#### $^1\text{H}$ NMR (300 MHz, $\text{CDCl}_3$ ) (1b):

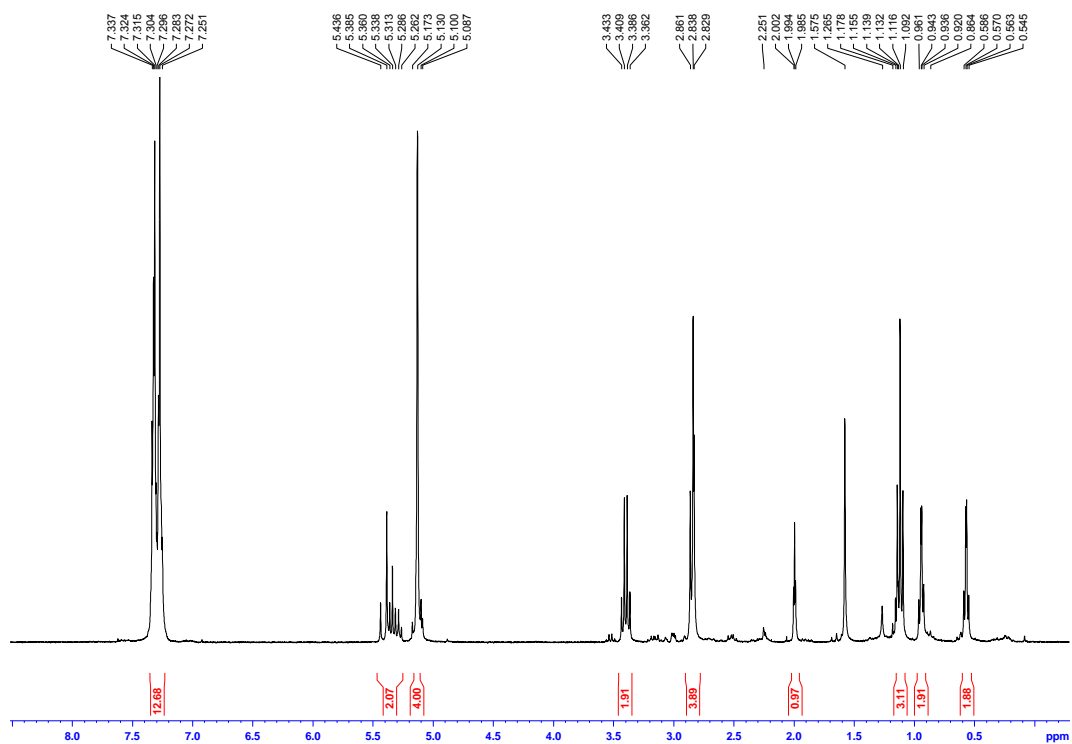

$^{13}\text{C}$  NMR (75 MHz,  $\text{CDCl}_3$ ) (1b):

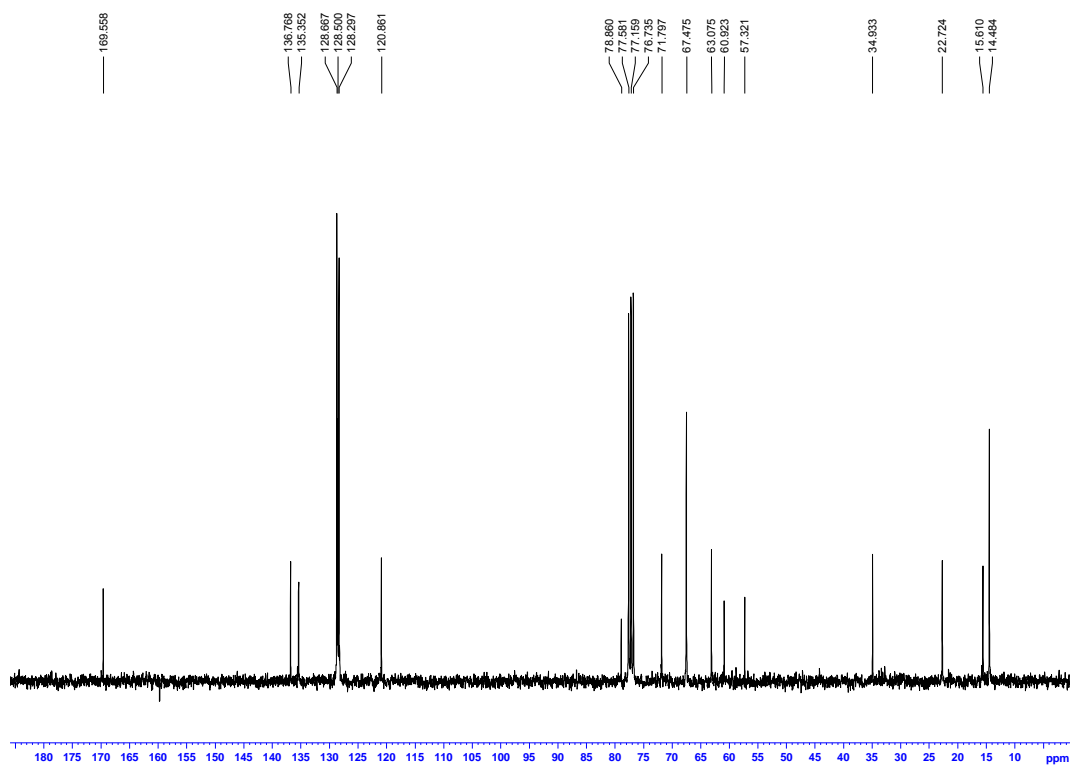

$^1\text{H}$  NMR (500 MHz,  $\text{CDCl}_3$ ) (1c):

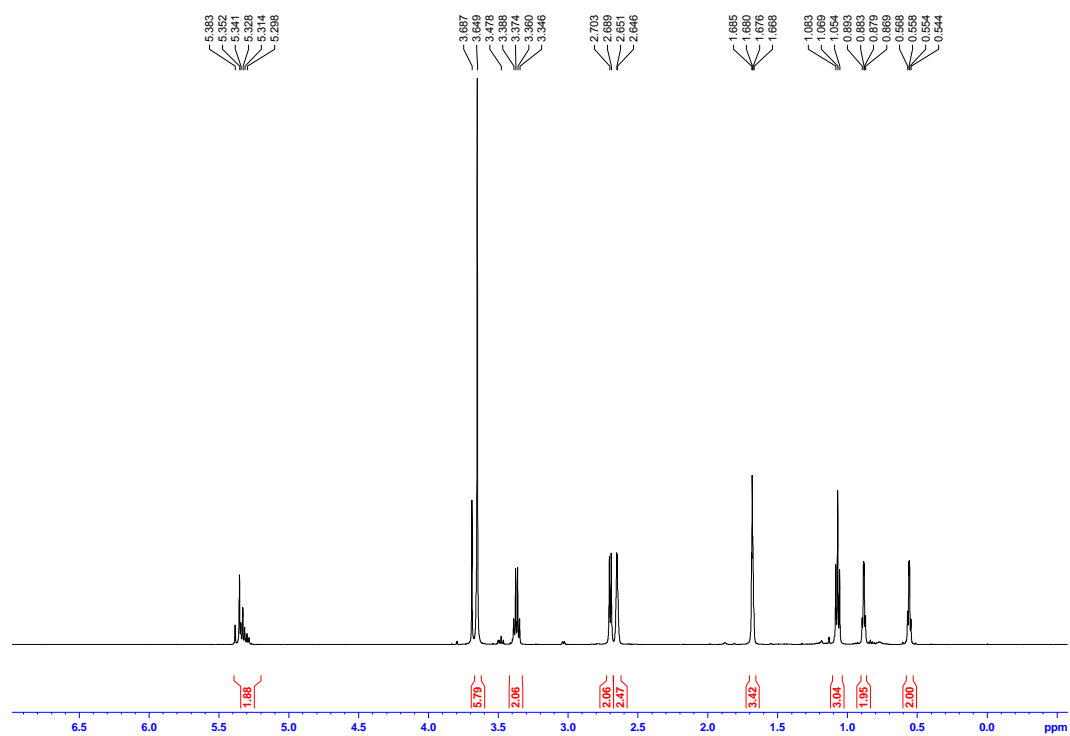

**$^{13}\text{C}$  NMR (75 MHz,  $\text{CDCl}_3$ ) (1c):**

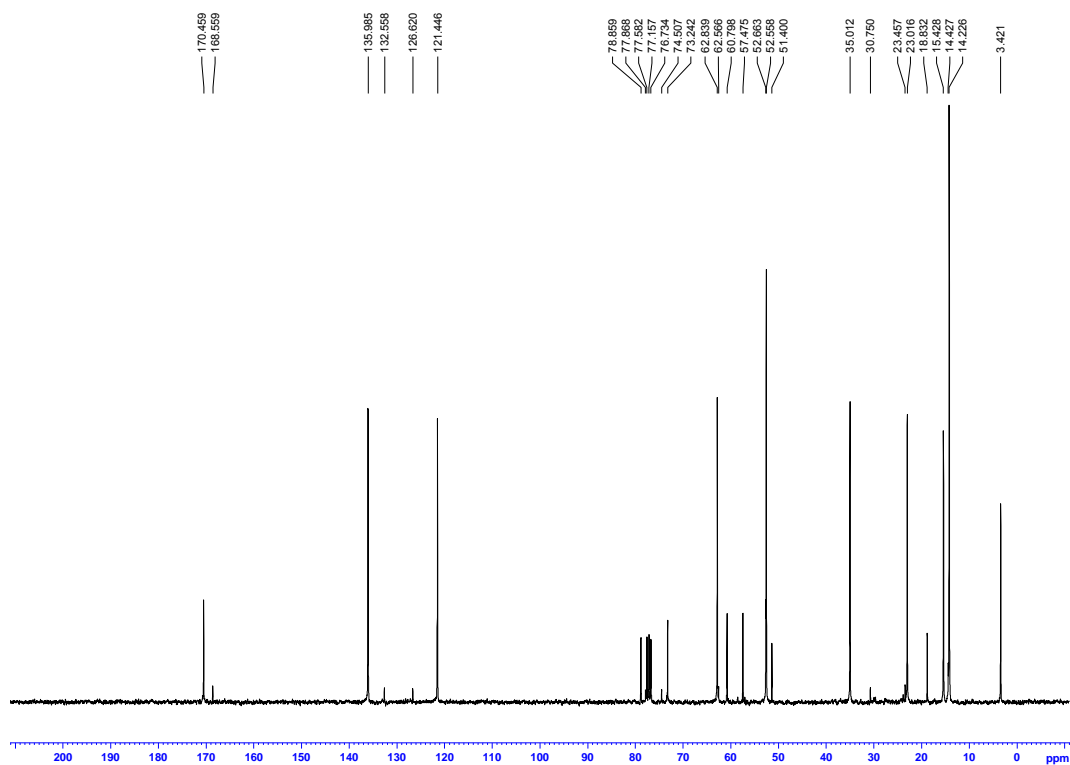

**$^1\text{H}$  NMR (300 MHz,  $\text{CDCl}_3$ ) (1d):**

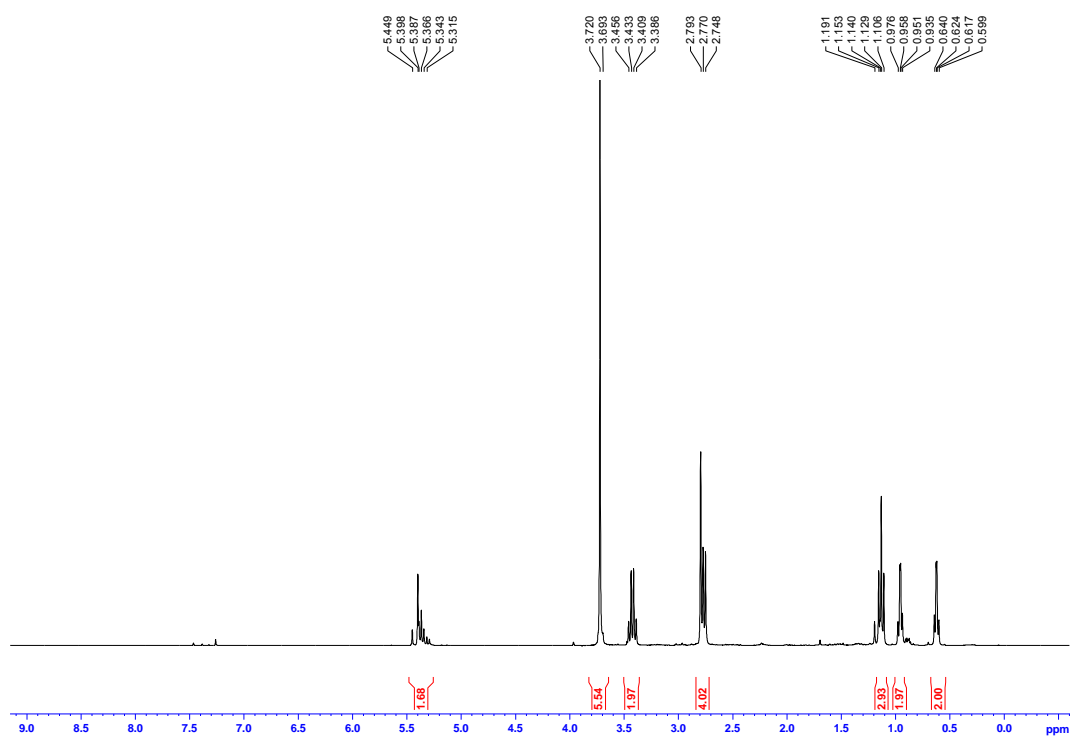

**$^{13}\text{C}$  NMR (75 MHz,  $\text{CDCl}_3$ ) (1d):**

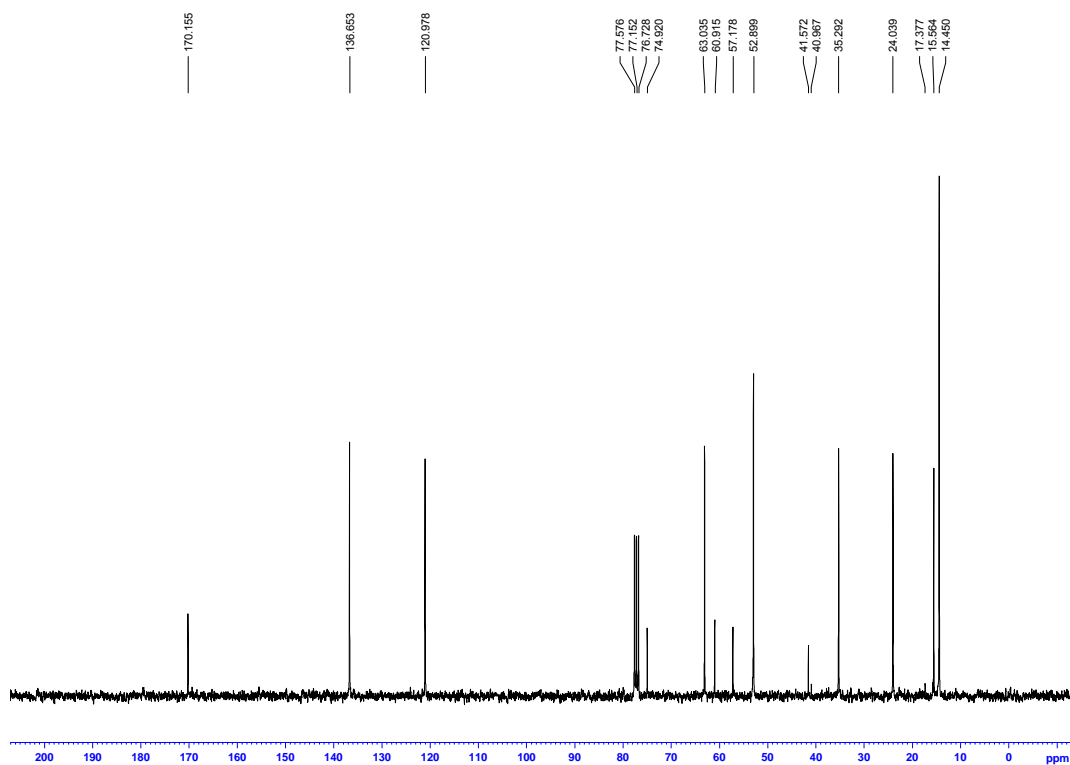

**$^1\text{H}$  NMR (300 MHz,  $\text{CDCl}_3$ ) (1e):**

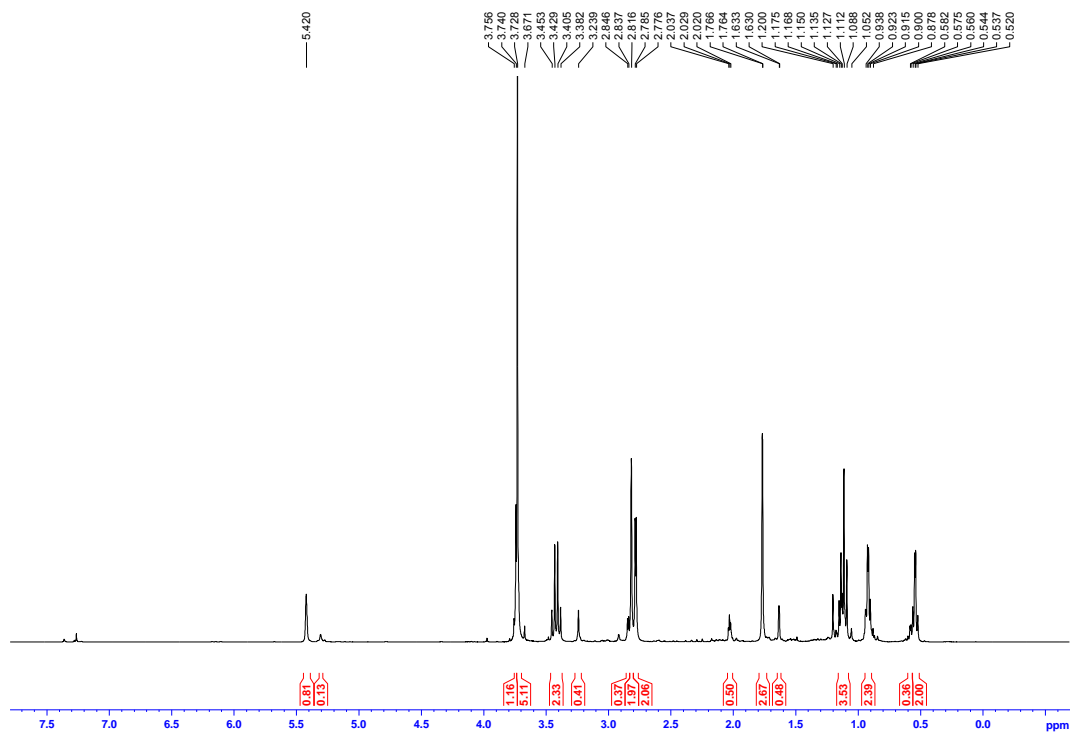

**<sup>1</sup>H NMR (300 MHz, CDCl<sub>3</sub>) (1f):**

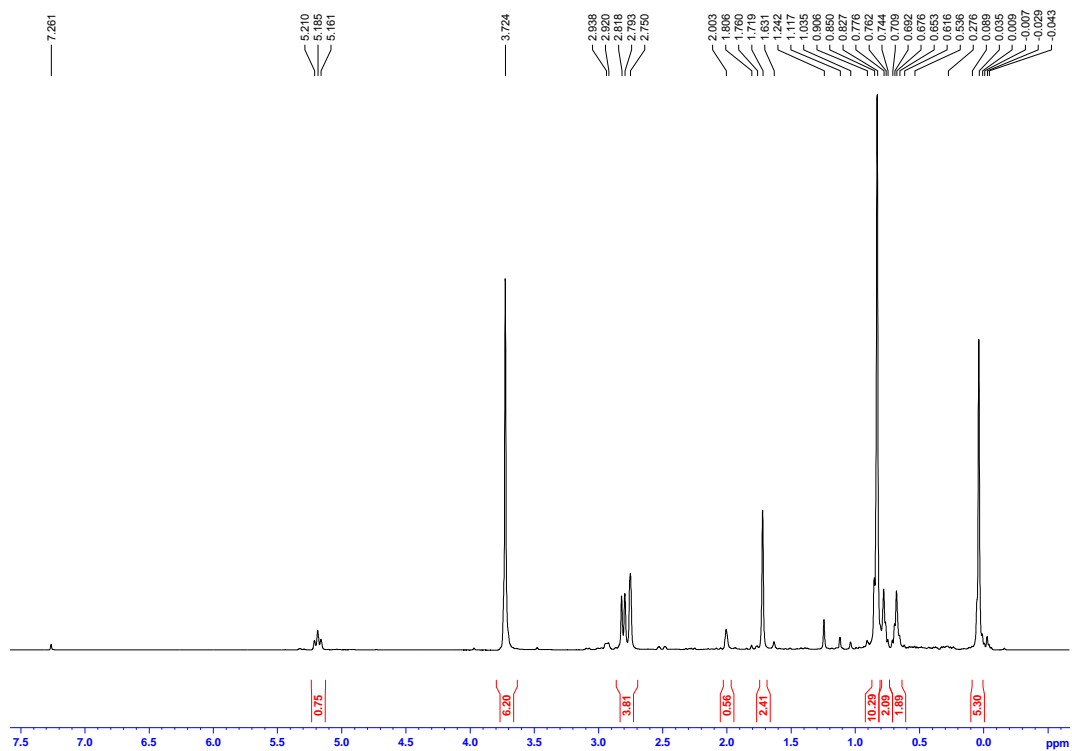

**<sup>13</sup>C NMR (75 MHz, CDCl<sub>3</sub>) (1f):**

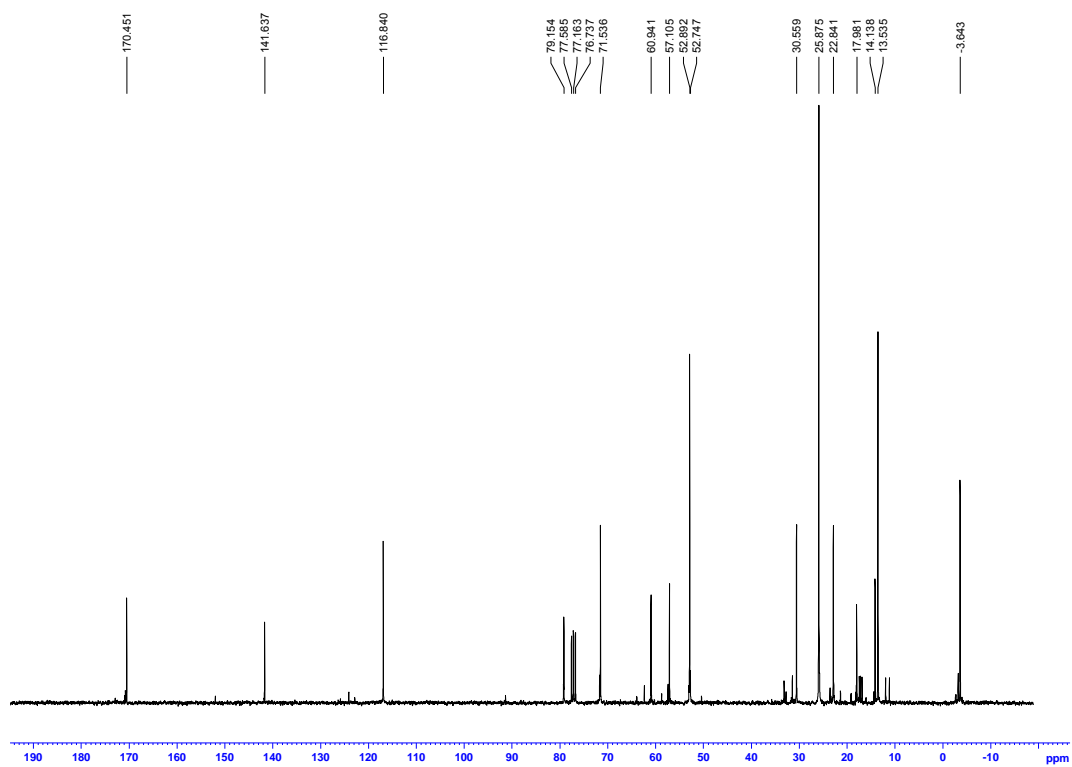

**$^1\text{H}$  NMR (300 MHz,  $\text{CDCl}_3$ ) (1g):**

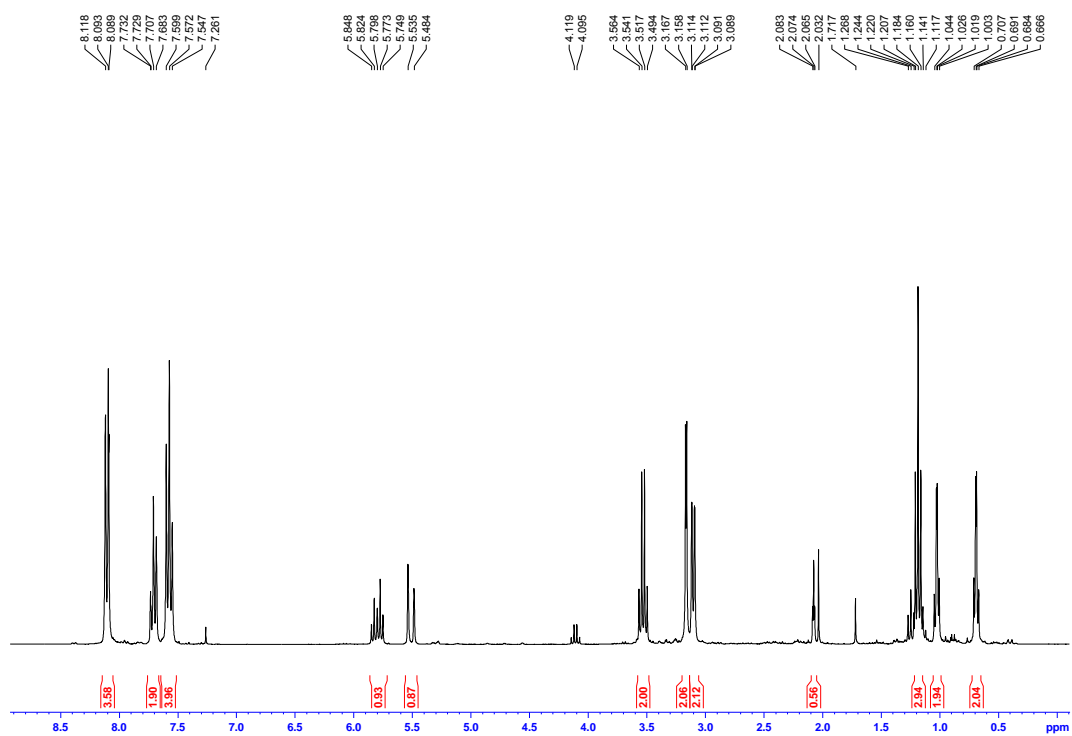

**$^{13}\text{C}$  NMR (75 MHz,  $\text{CDCl}_3$ ) (1g):**

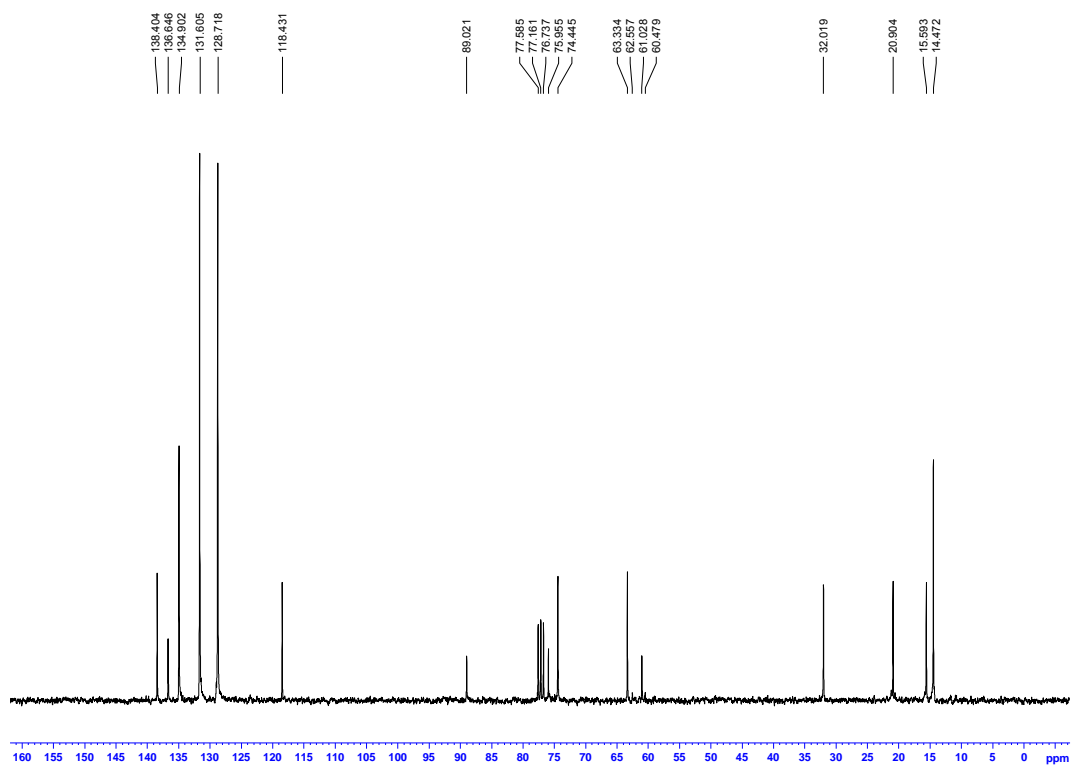

**$^1\text{H}$  NMR (300 MHz,  $\text{CDCl}_3$ ) (1h):**

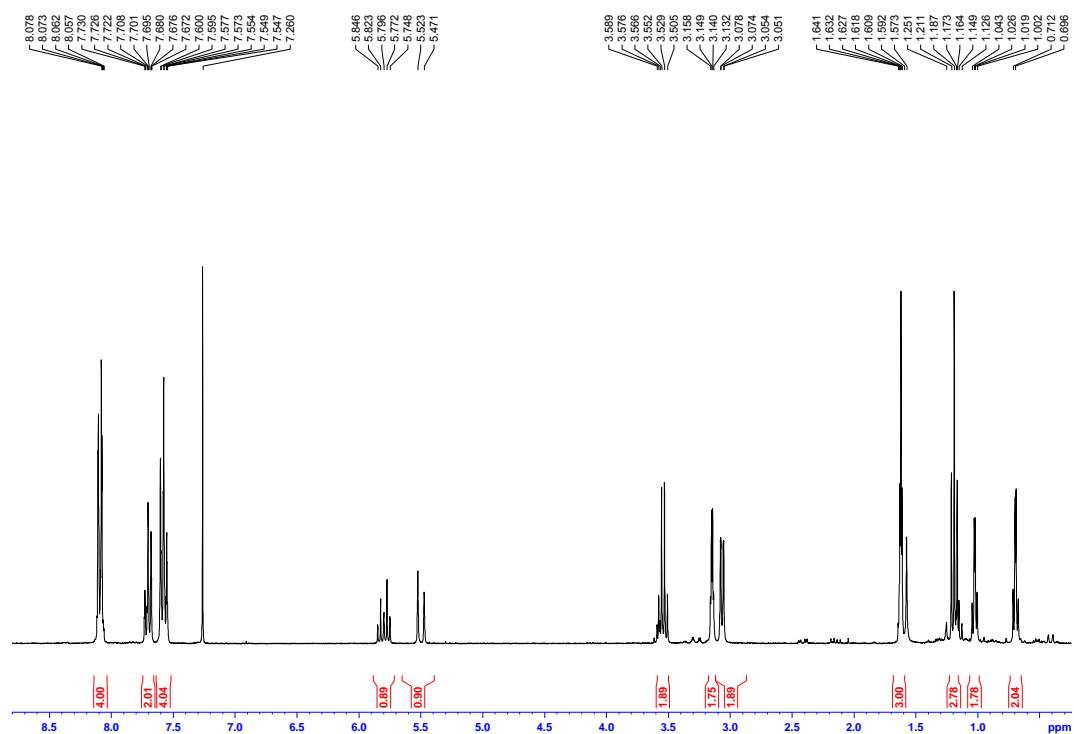

**$^{13}\text{C}$  NMR (75 MHz,  $\text{CDCl}_3$ ) (1h):**

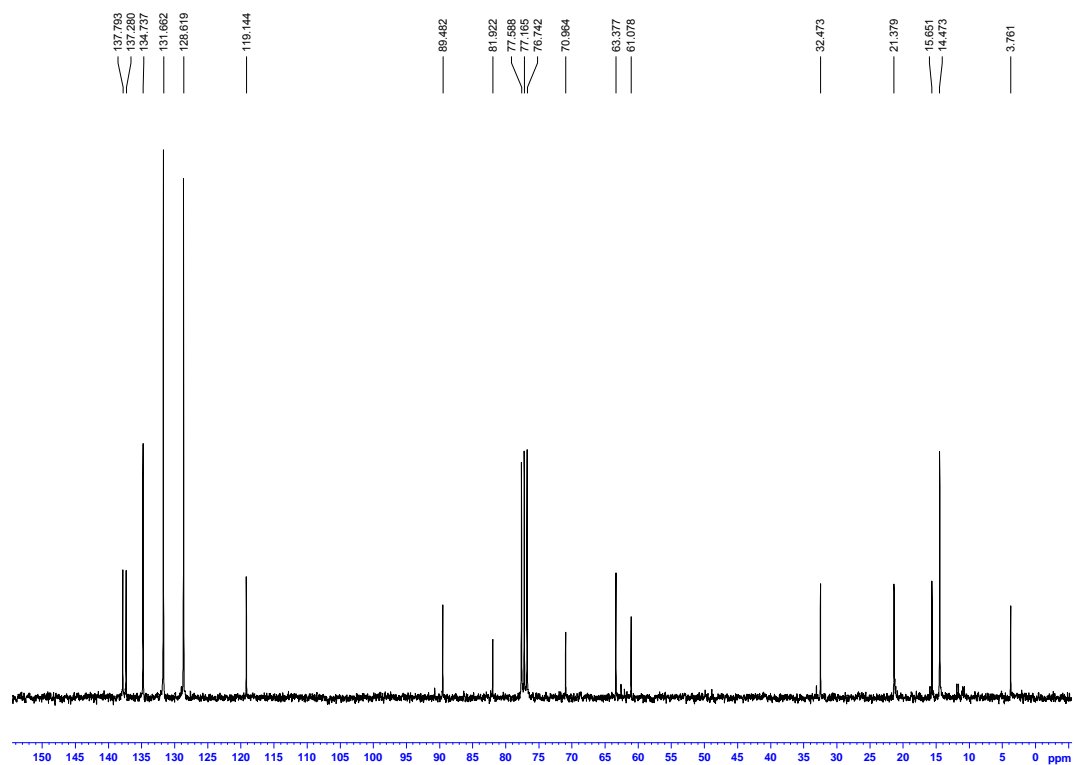



**$^1\text{H}$  NMR (300 MHz,  $\text{CDCl}_3$ ) (1i):**

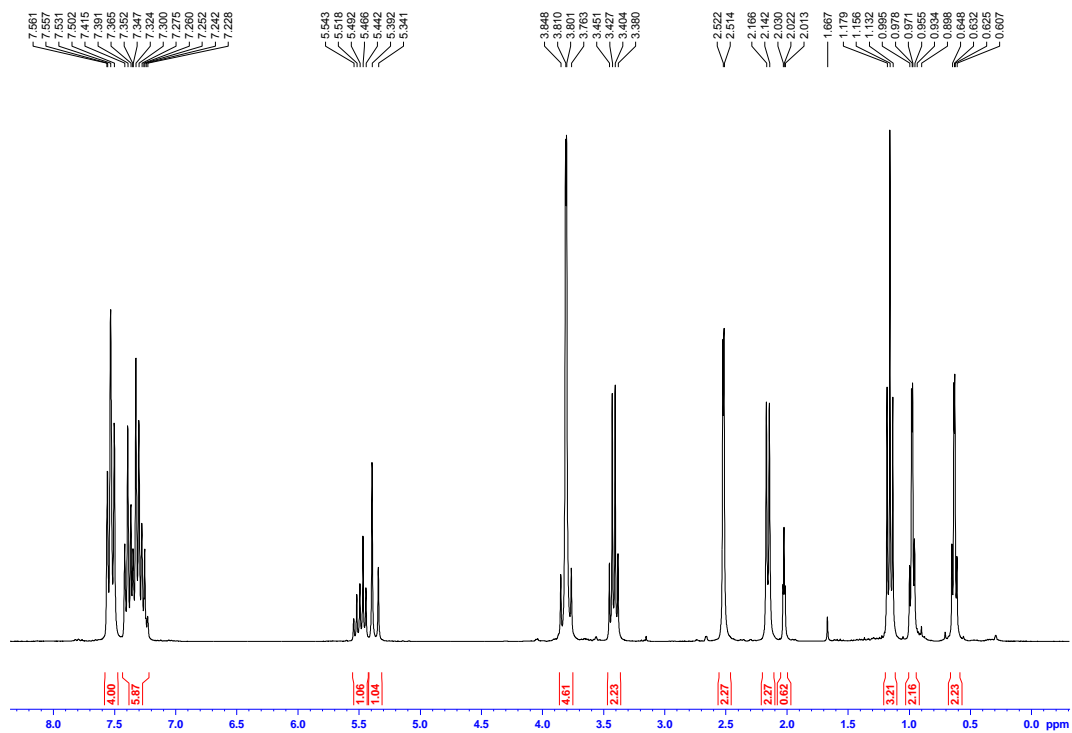

**$^{13}\text{C}$  NMR (75 MHz,  $\text{CDCl}_3$ ) (1i):**

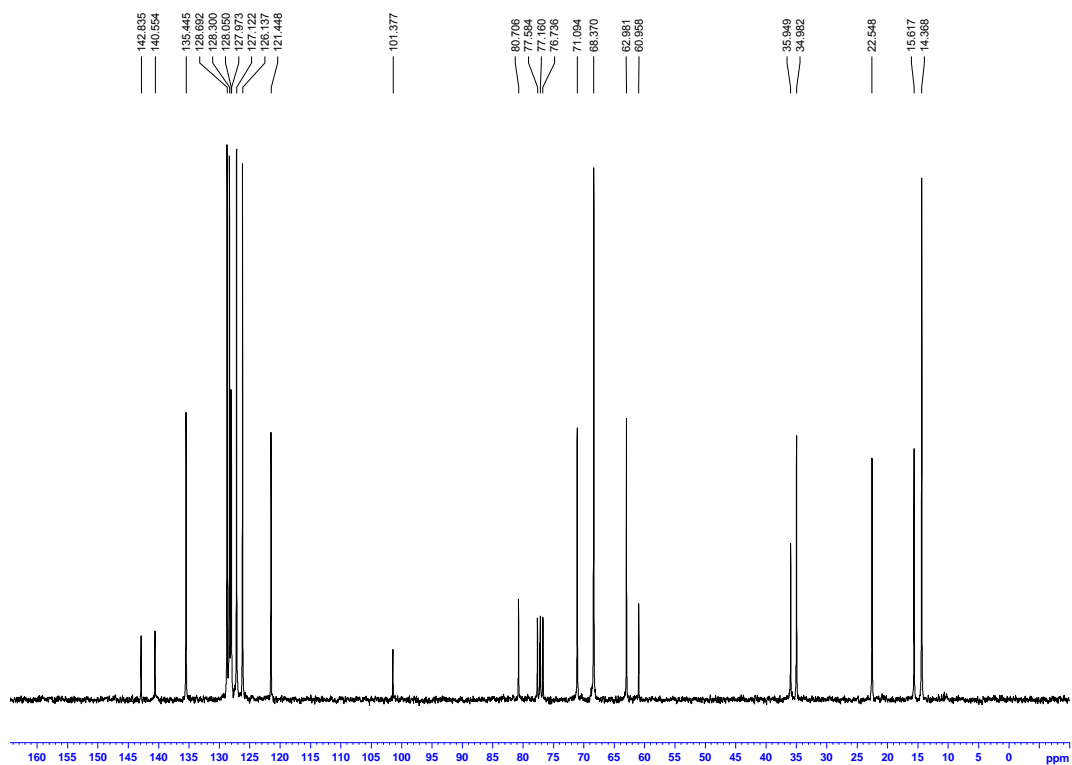

**<sup>1</sup>H NMR (300 MHz, CDCl<sub>3</sub>) (1j):**

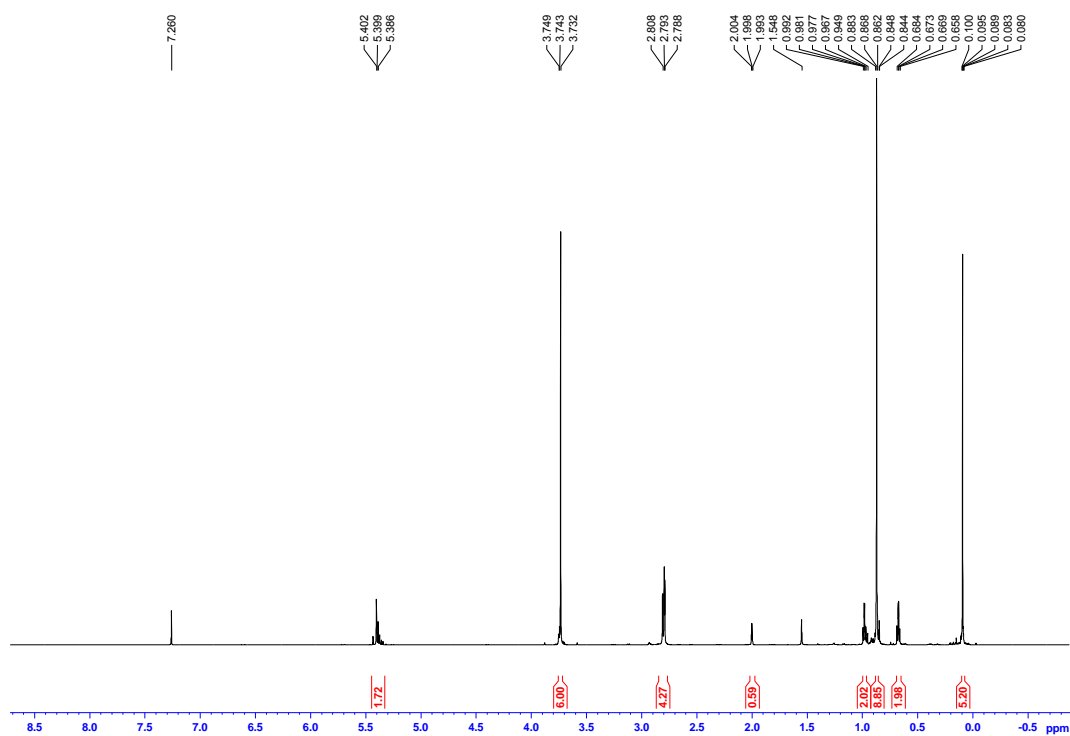

**<sup>13</sup>C NMR (75 MHz, CDCl<sub>3</sub>) (1j):**

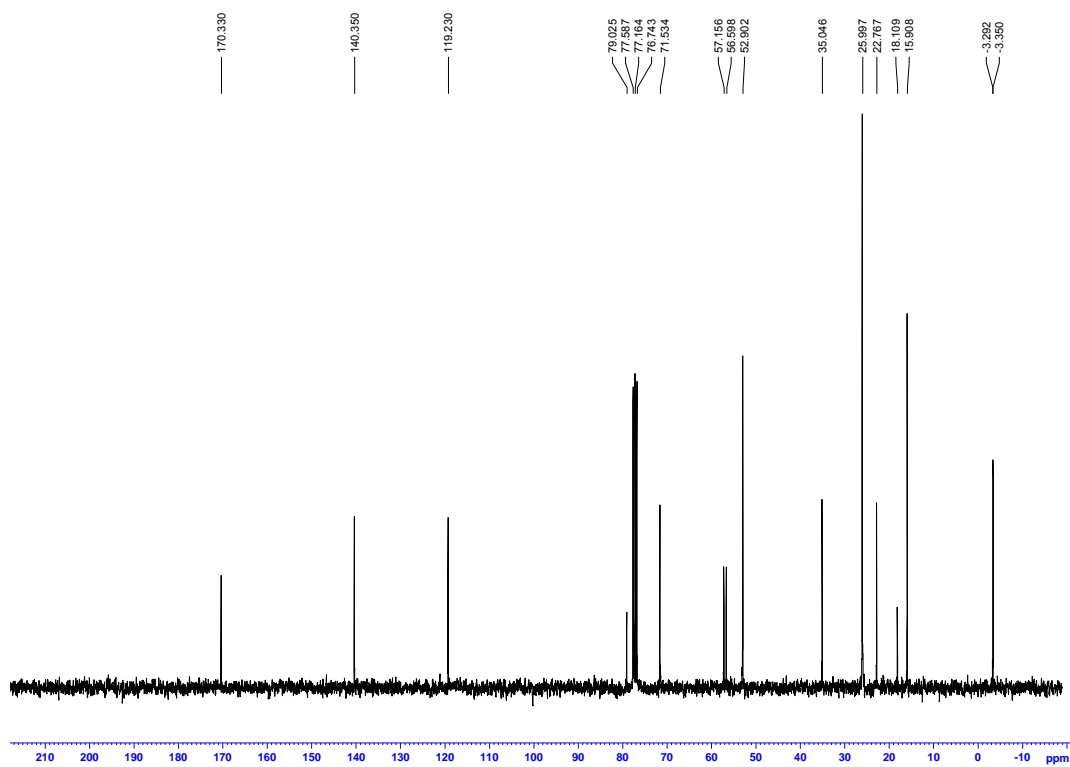

**$^1\text{H}$  NMR (300 MHz,  $\text{CDCl}_3$ ) (1k):**

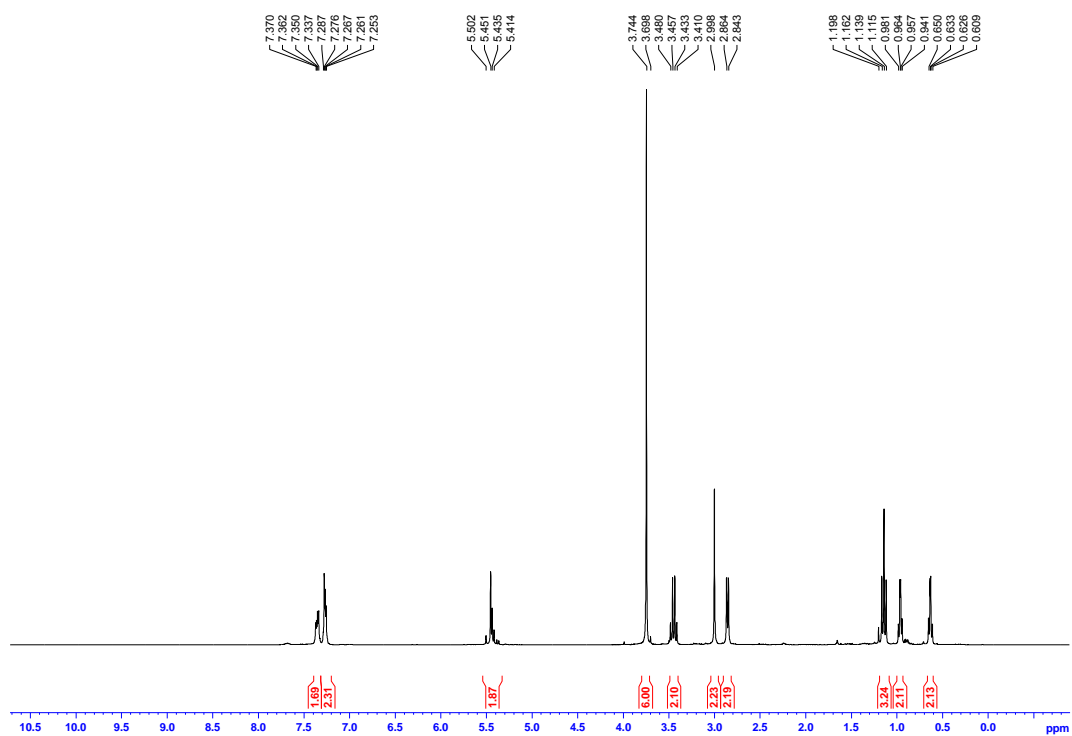

**$^{13}\text{C}$  NMR (75 MHz,  $\text{CDCl}_3$ ) (1k):**

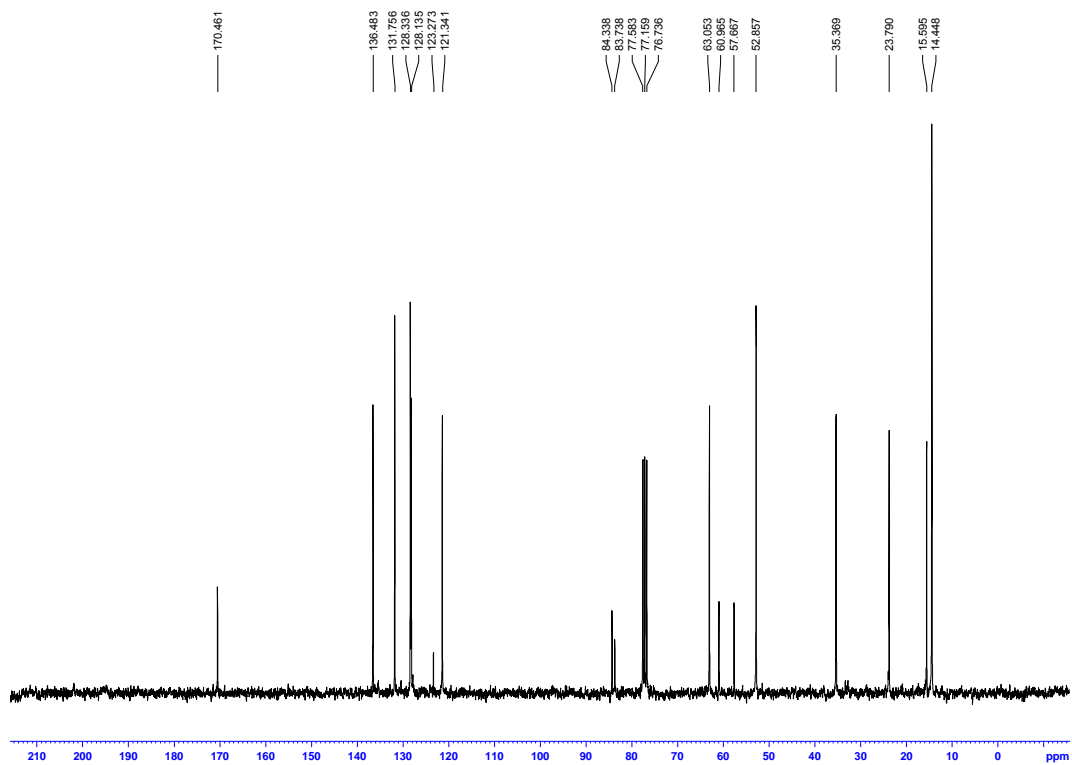

**<sup>1</sup>H NMR (300 MHz, CDCl<sub>3</sub>) (*cis*-3a):**

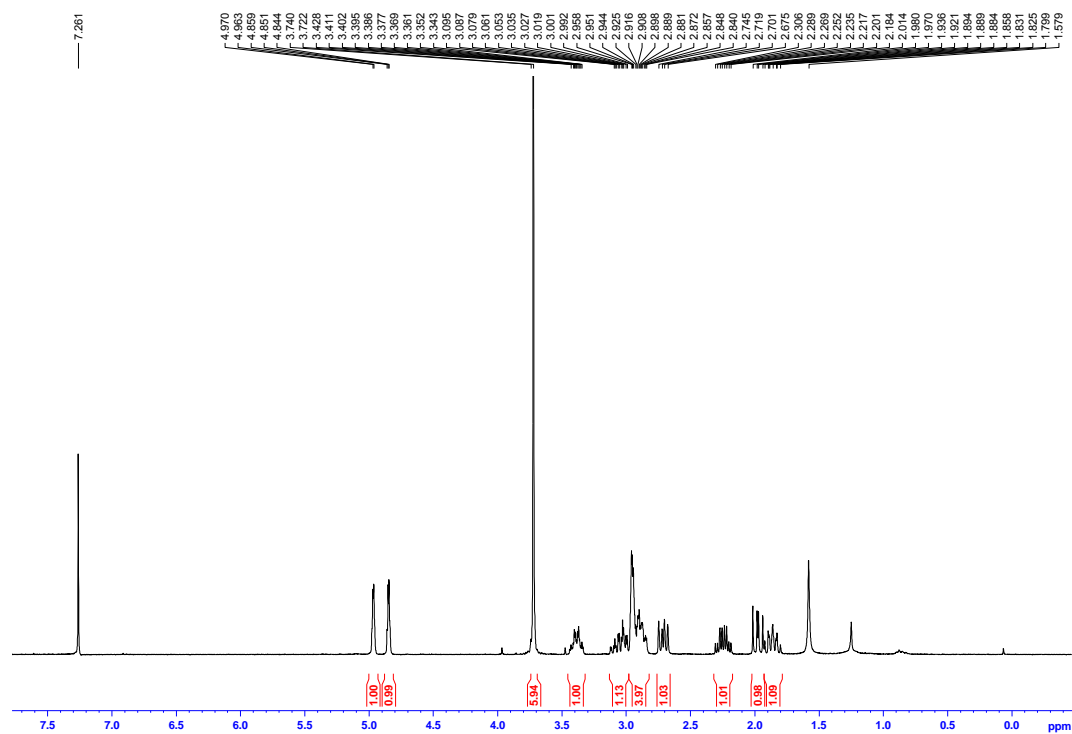

**<sup>13</sup>C NMR (75 MHz, CDCl<sub>3</sub>) (*cis*-3a):**

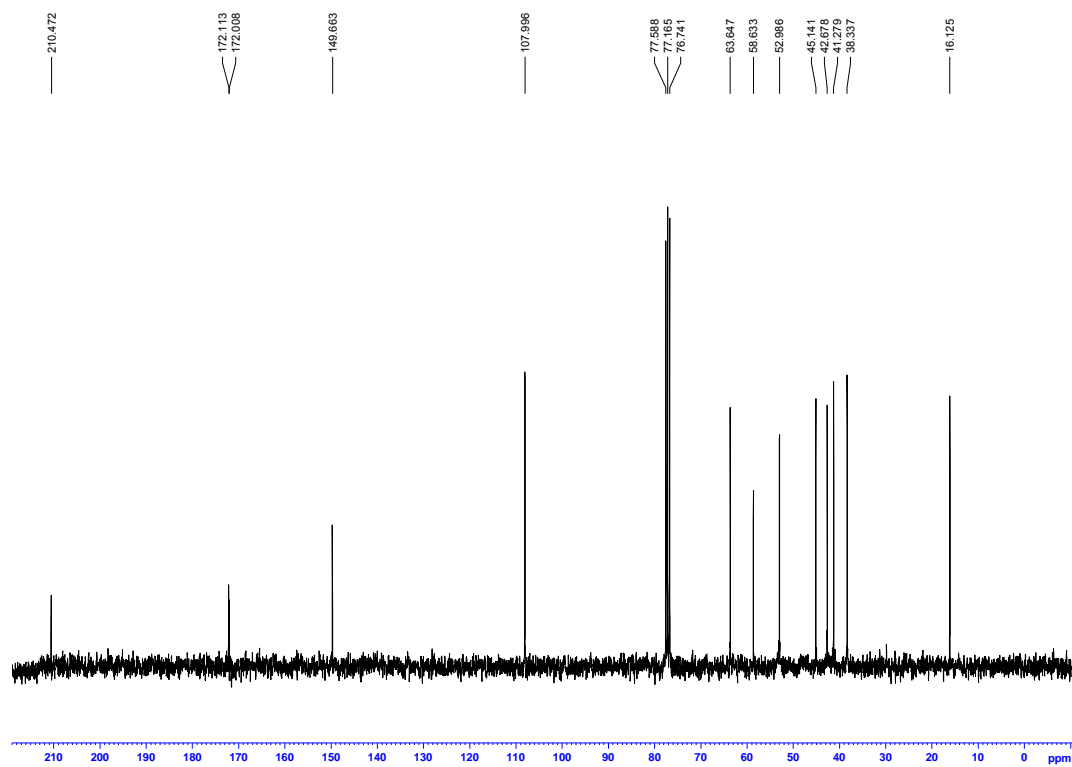

**$^1\text{H}$  NMR (300 MHz,  $\text{CDCl}_3$ ) (*trans*-3a):**

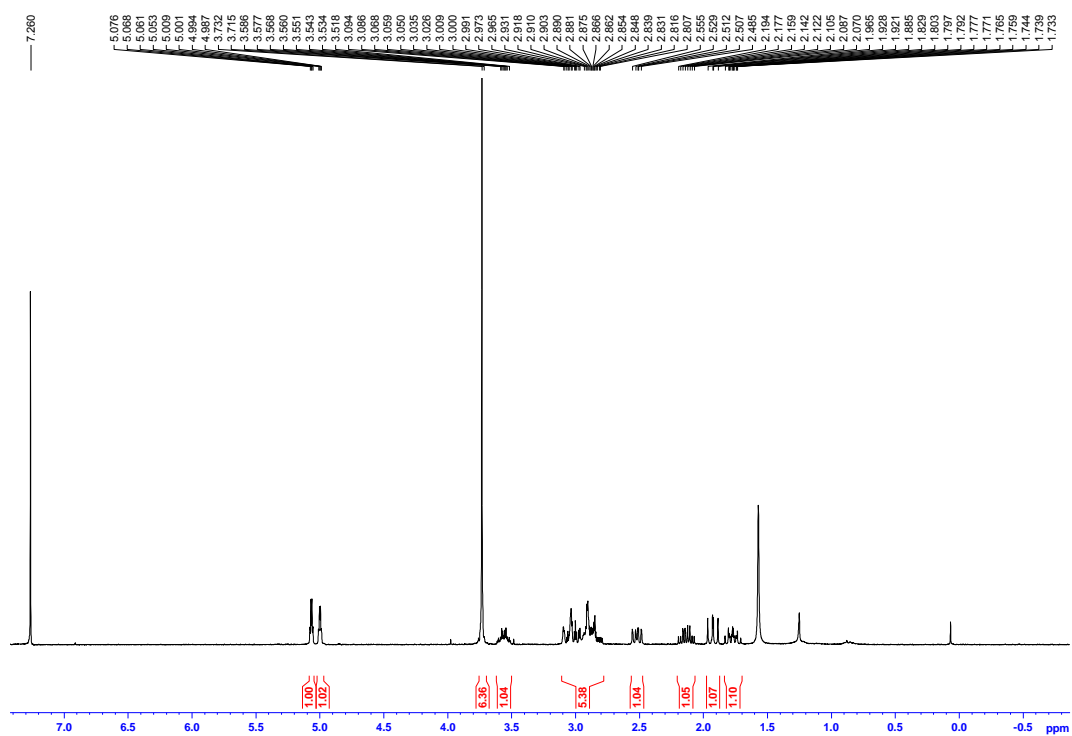

**$^{13}\text{C}$  NMR (75 MHz,  $\text{CDCl}_3$ ) (*trans*-3a):**

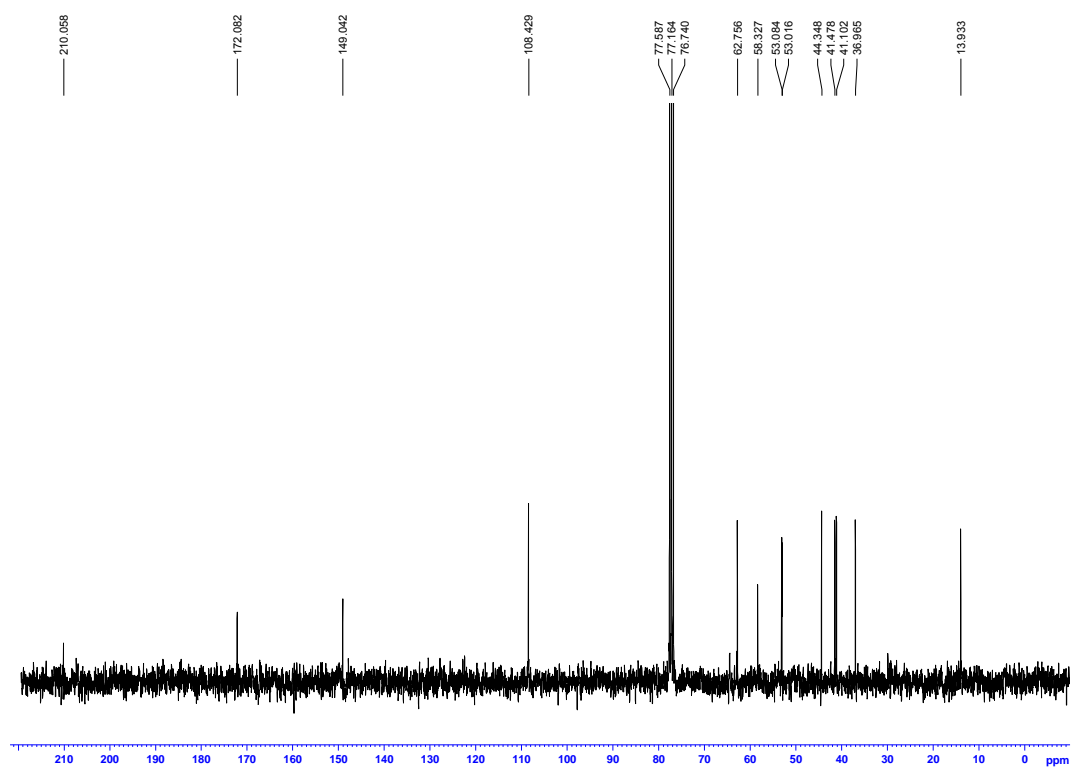

**<sup>1</sup>H NMR (300 MHz, CDCl<sub>3</sub>) (*cis*-3b):**

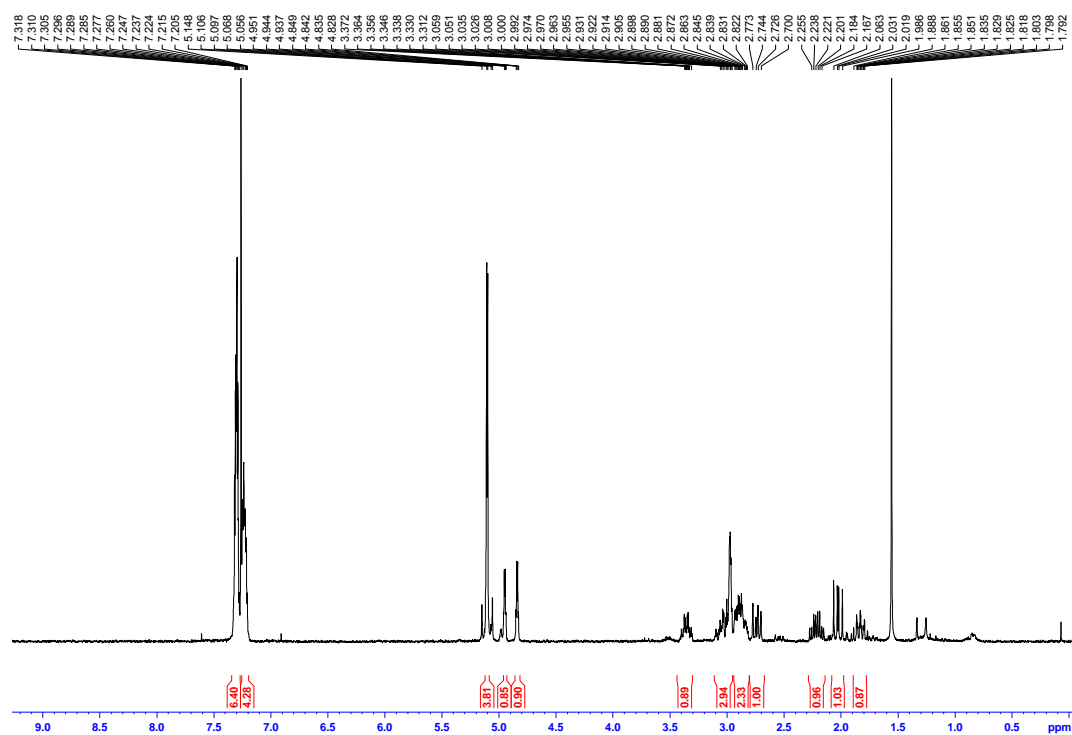

**<sup>13</sup>C NMR (75 MHz, CDCl<sub>3</sub>) (*cis*-3b):**

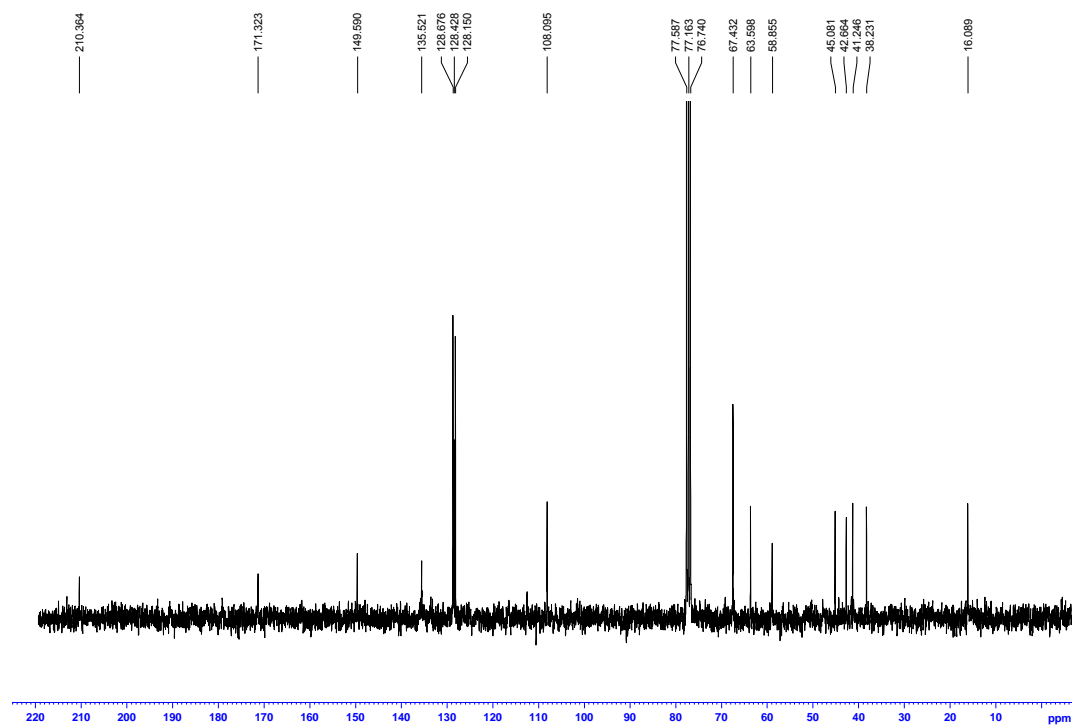

**<sup>1</sup>H NMR (500 MHz, CDCl<sub>3</sub>) (*cis*-3c):**

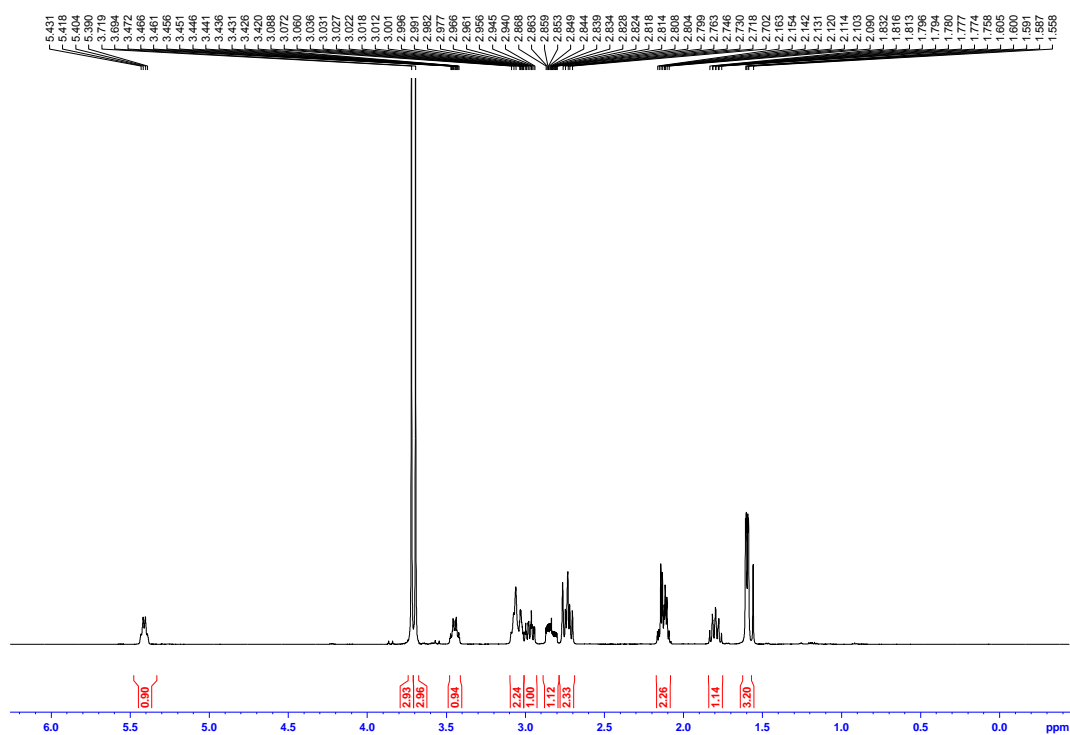

**<sup>13</sup>C NMR (75 MHz, CDCl<sub>3</sub>) (*cis*-3c):**

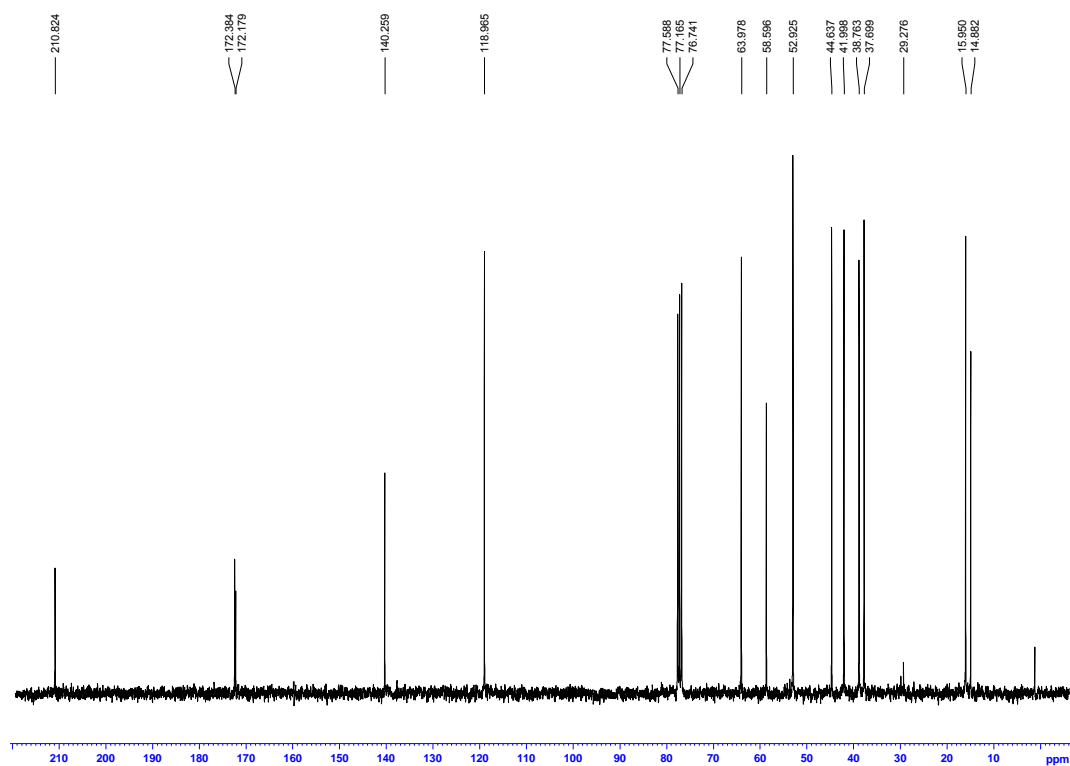

**$^1\text{H}$  NMR (300 MHz,  $\text{CDCl}_3$ ) (*cis*-3d):**

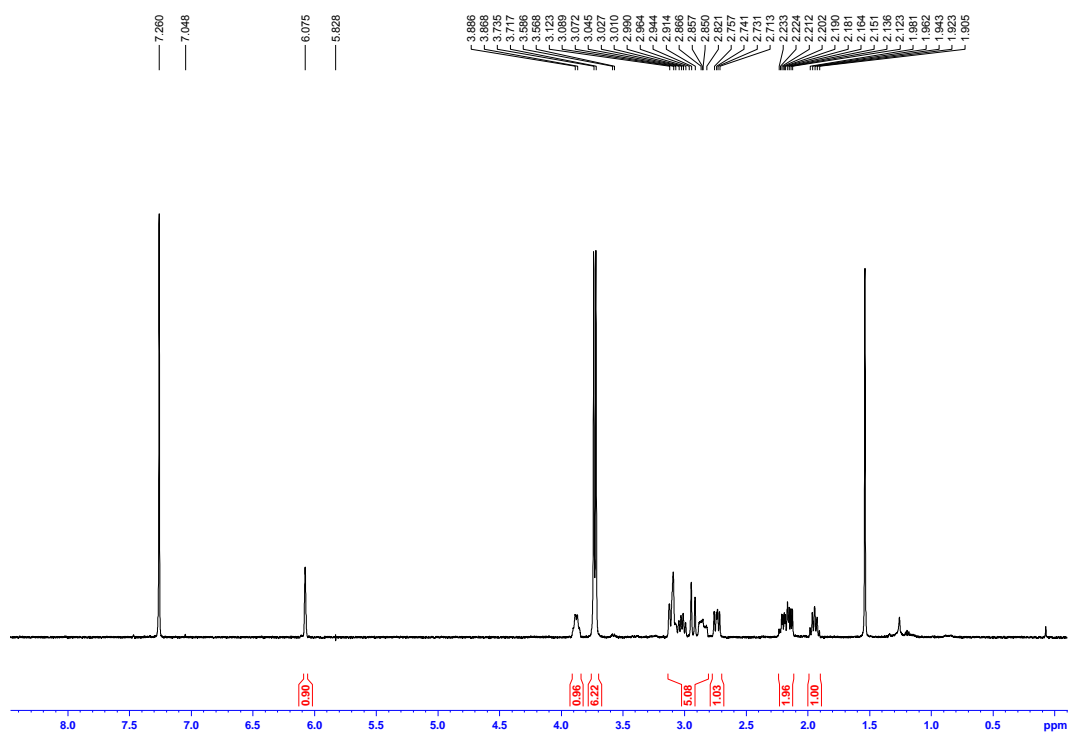

**$^{13}\text{C}$  NMR (75 MHz,  $\text{CDCl}_3$ ) (*cis*-3d):**

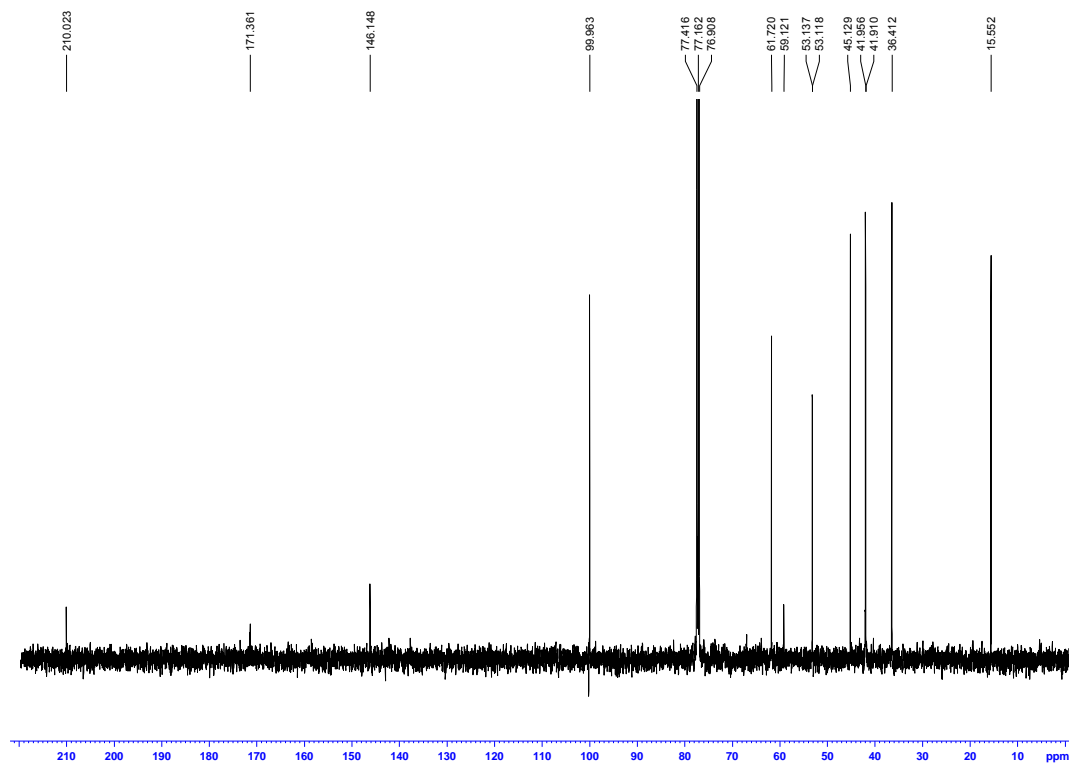



**<sup>1</sup>H NMR (300 MHz, CDCl<sub>3</sub>) (*cis*-**3e** + *trans*-**3e**):**

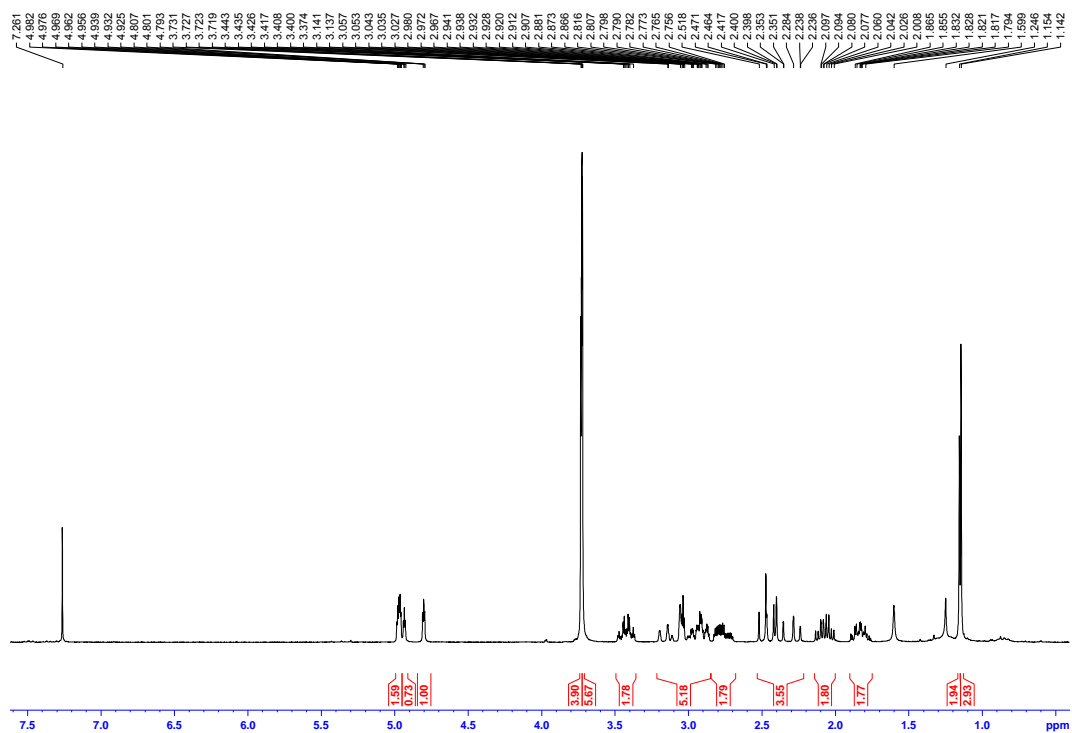

**<sup>13</sup>C NMR (75 MHz, CDCl<sub>3</sub>) (*cis*-**3e** + *trans*-**3e**):**

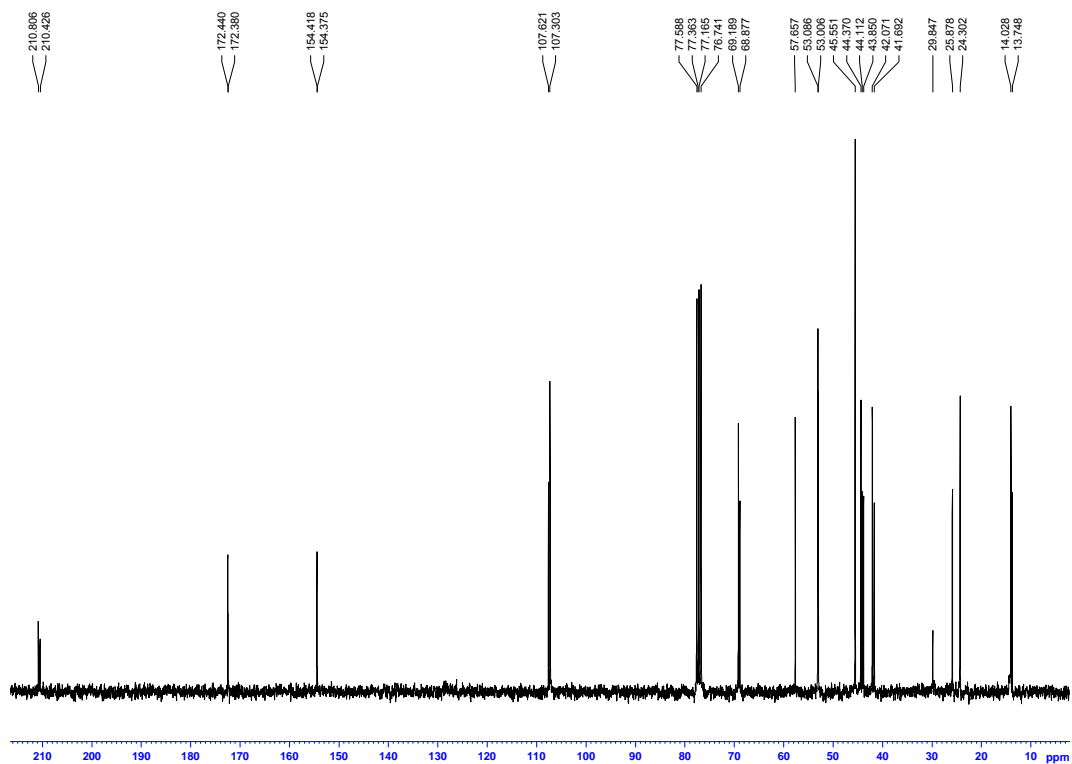

**<sup>1</sup>H NMR (300 MHz, CDCl<sub>3</sub>) (*cis*-3f):**

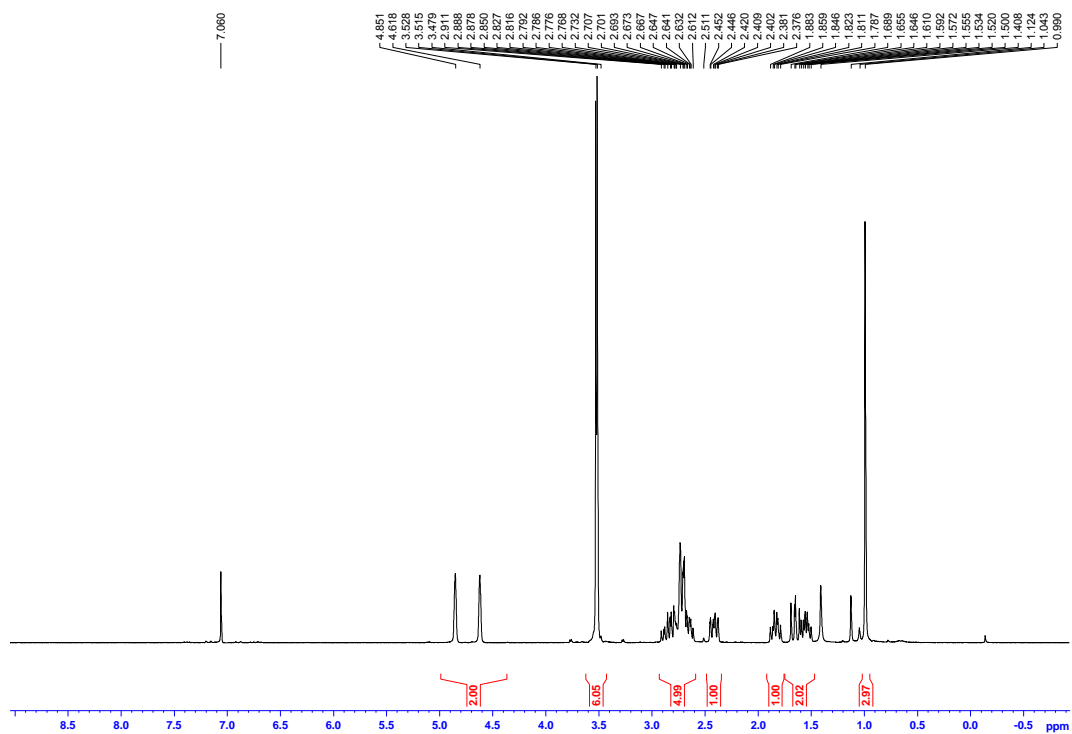

**<sup>13</sup>C NMR (75 MHz, CDCl<sub>3</sub>) (*cis*-3f):**

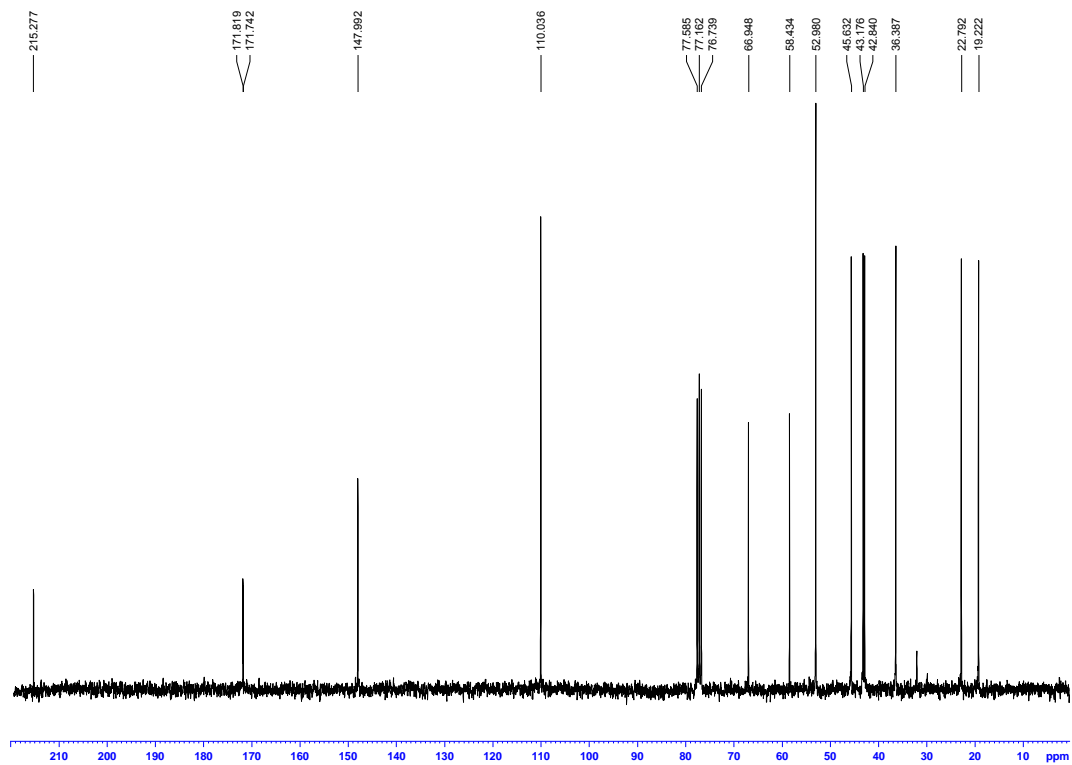

**$^1\text{H}$  NMR (300 MHz,  $\text{CDCl}_3$ ) (*trans*-3f):**

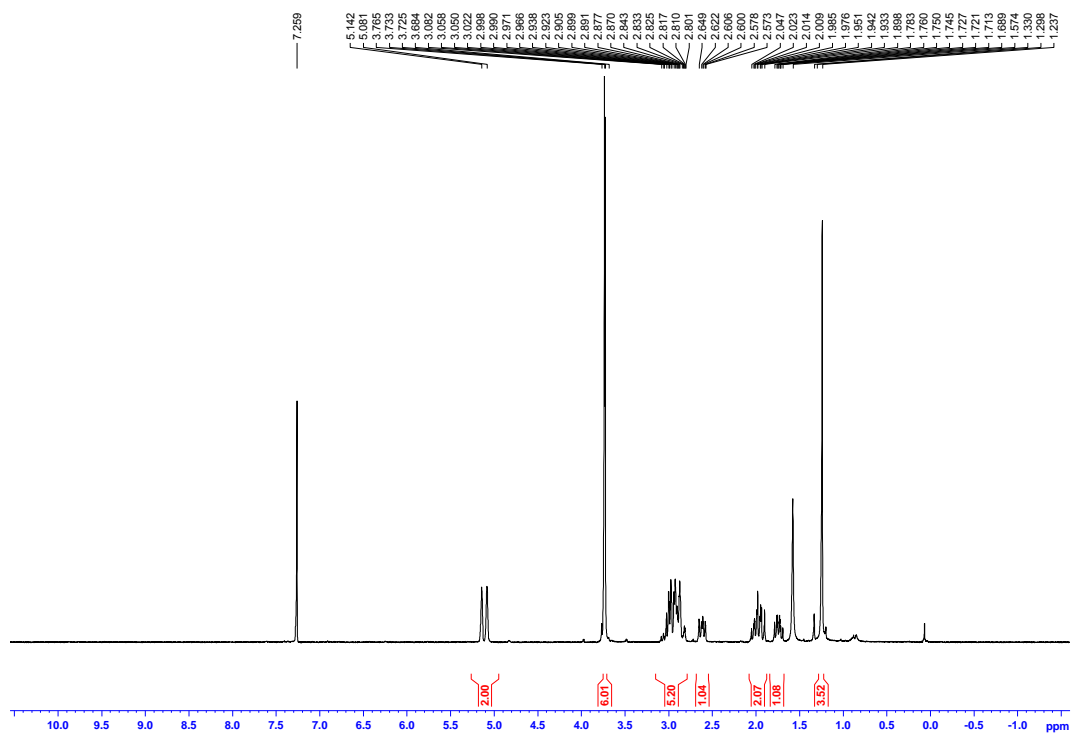

**$^{13}\text{C}$  NMR (75 MHz,  $\text{CDCl}_3$ ) (*trans*-3f):**

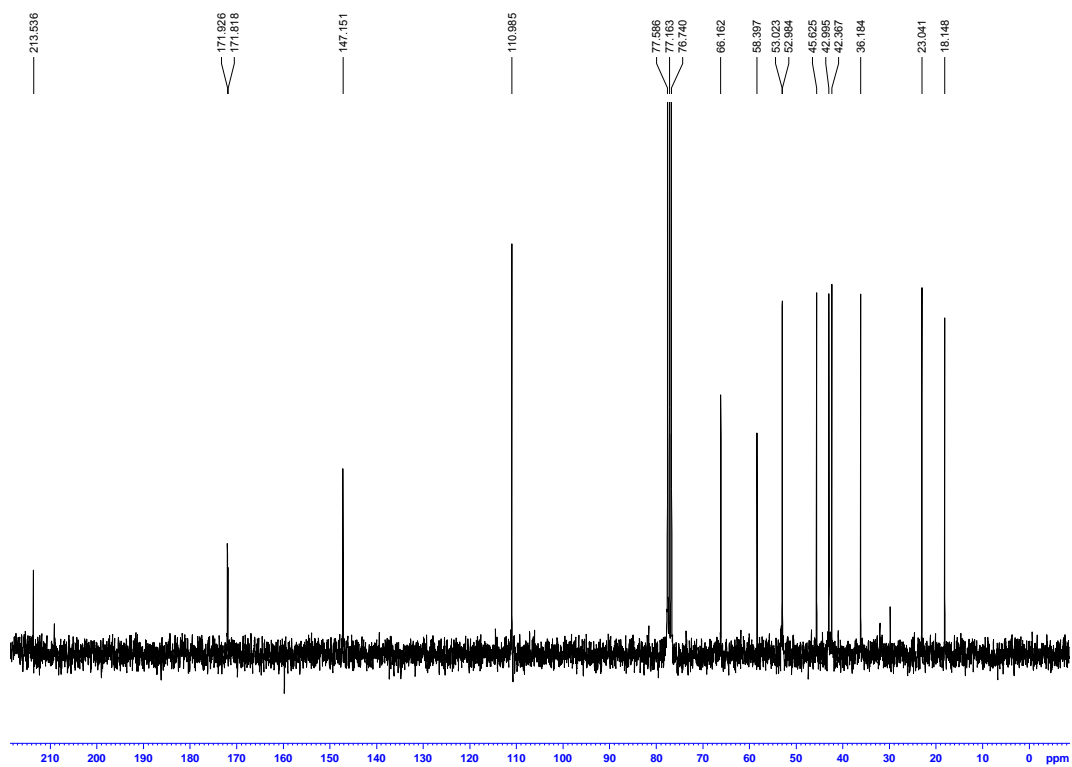

**<sup>1</sup>H NMR (300 MHz, CDCl<sub>3</sub>) (*cis*-3g):**

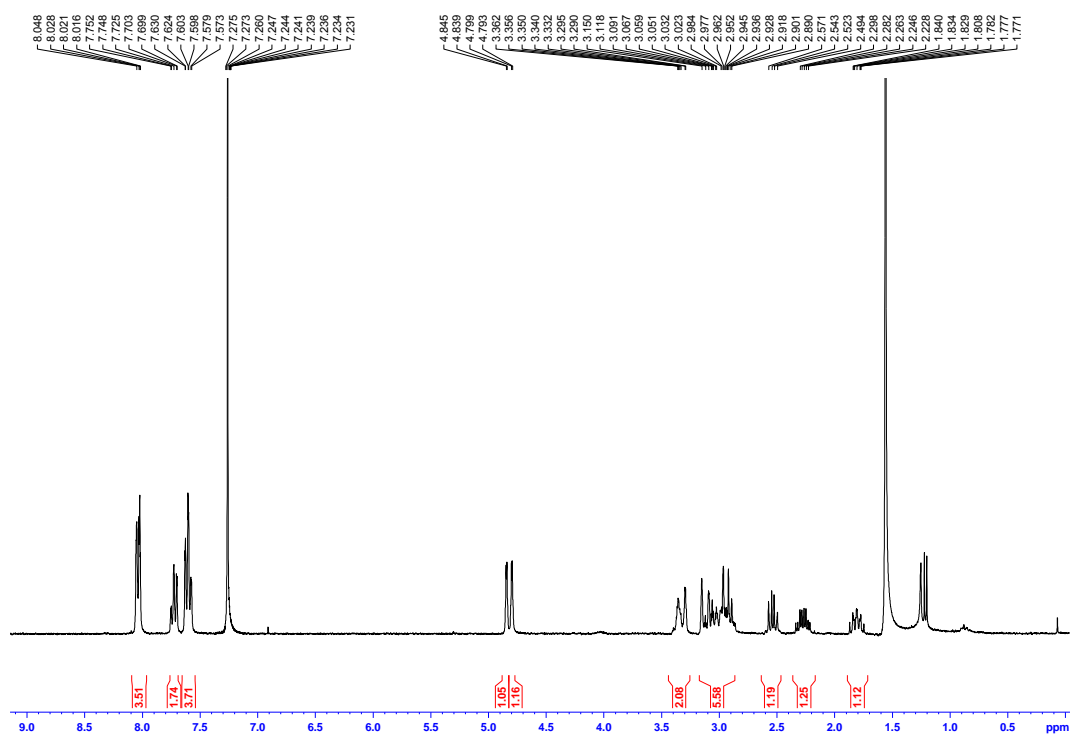

**<sup>1</sup>H NMR (300 MHz, CDCl<sub>3</sub>) (*trans*-3g):**

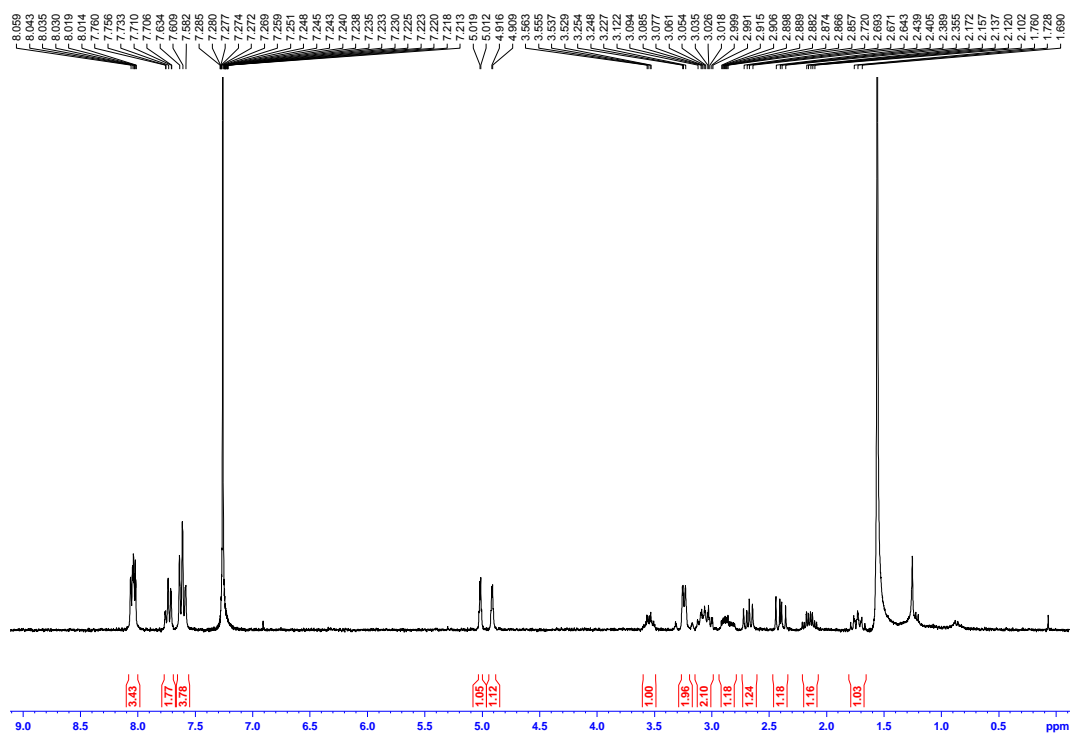

$^{13}\text{C}$  NMR (75 MHz,  $\text{CDCl}_3$ ) (*cis*-**3g** + *trans*-**3g**):

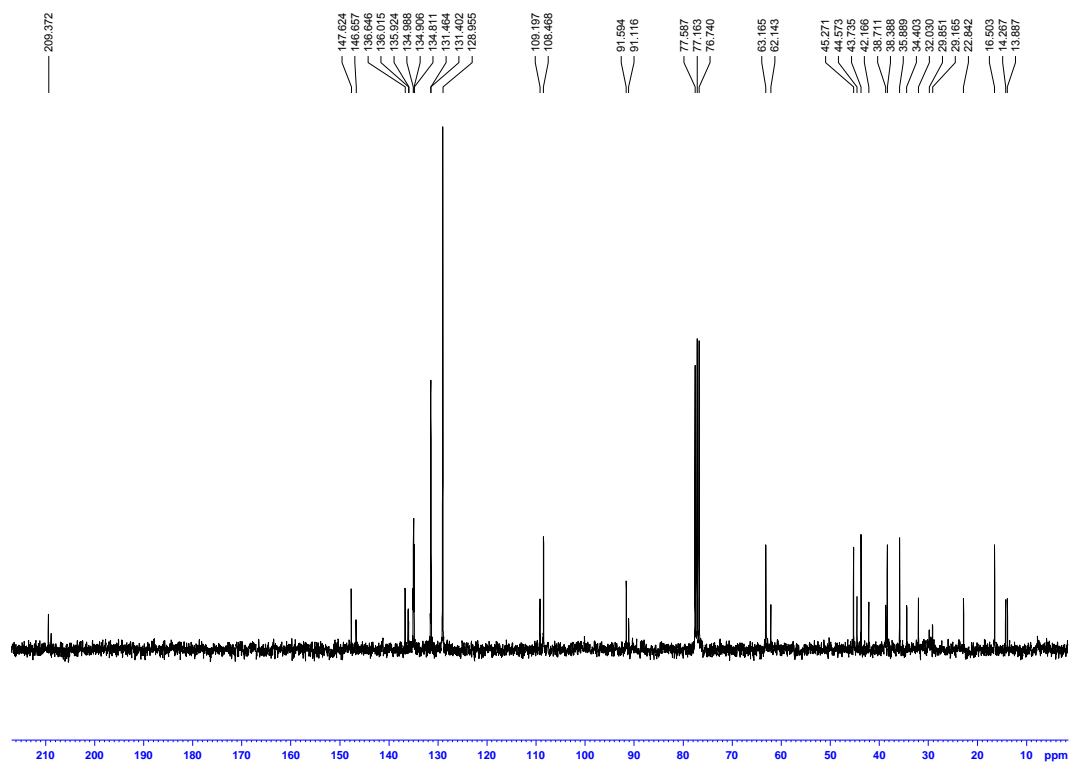

$^1\text{H}$  NMR (300 MHz,  $\text{CDCl}_3$ ) (*cis*-**3h**):

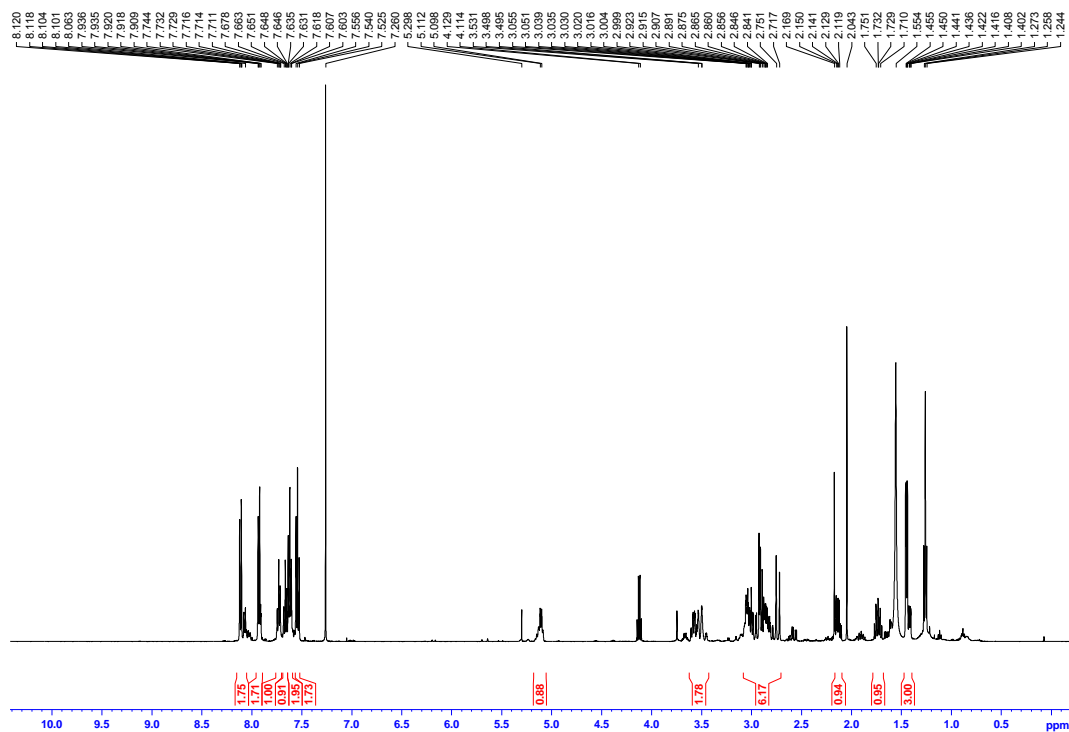

$^{13}\text{C}$  NMR (75 MHz,  $\text{CDCl}_3$ ) (*cis*-3h):

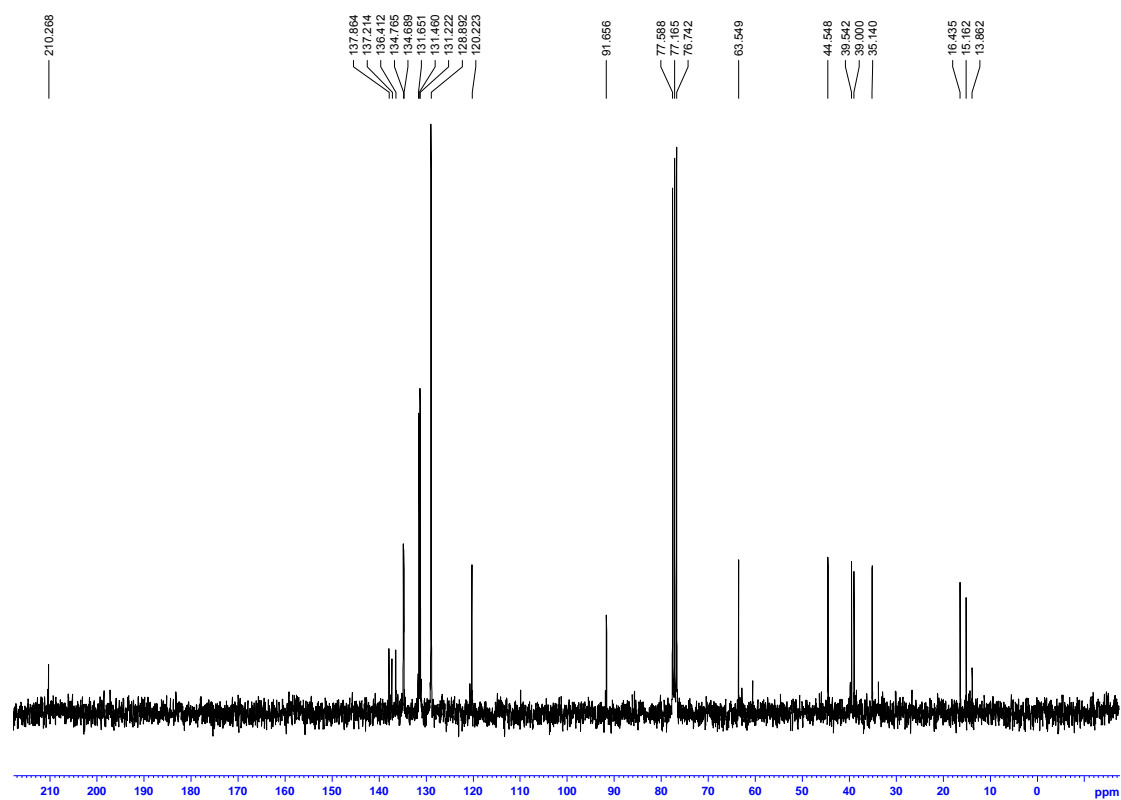

$^1\text{H}$  NMR (300 MHz,  $\text{CDCl}_3$ ) (*cis*-3i + *trans*-3i):

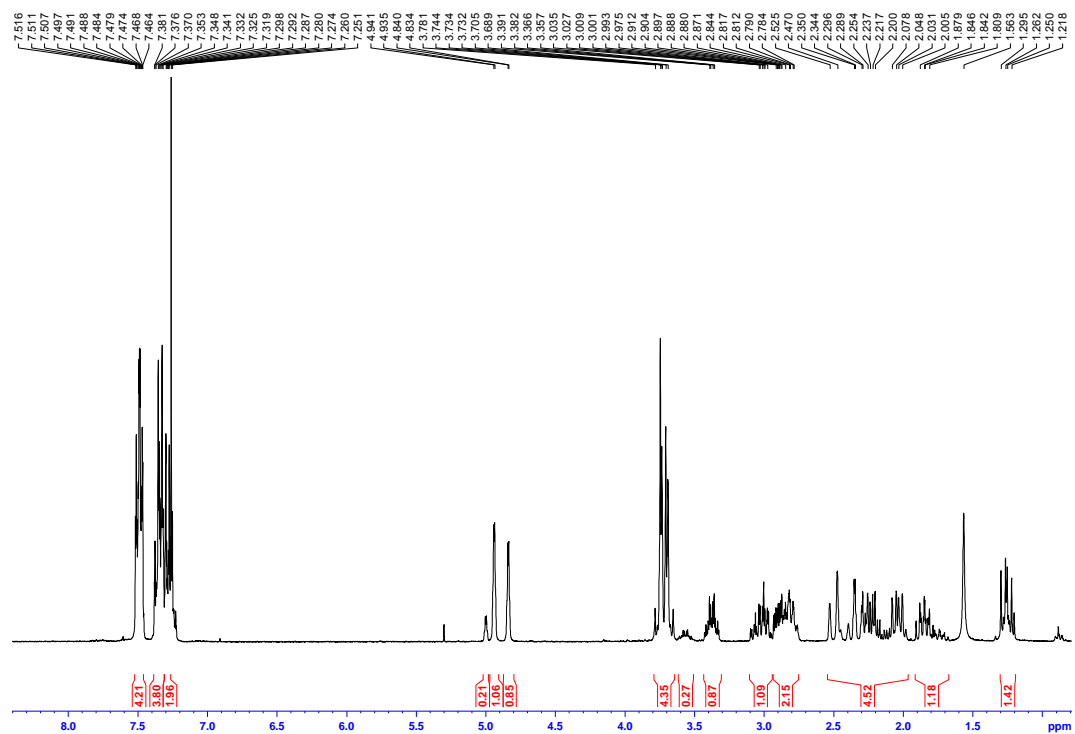

$^{13}\text{C}$  NMR (75 MHz,  $\text{CDCl}_3$ ) (*cis*-**3i** + *trans*-**3i**):

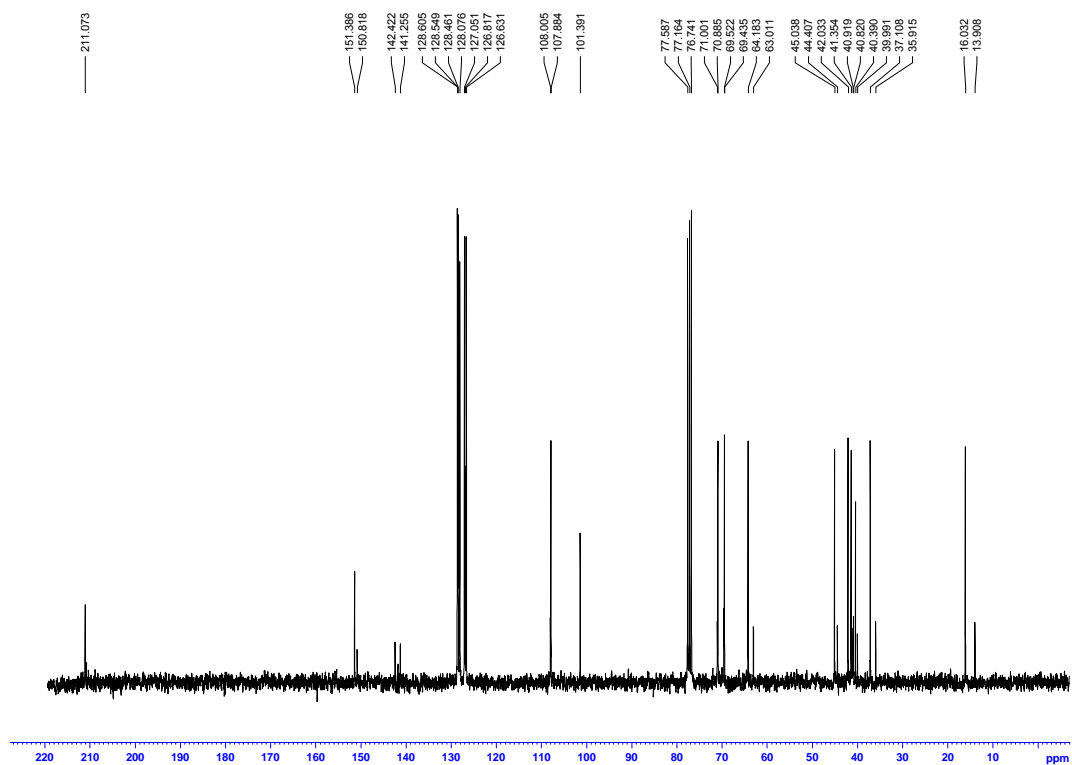

$^1\text{H}$  NMR (300 MHz,  $\text{CDCl}_3$ ) (S15):

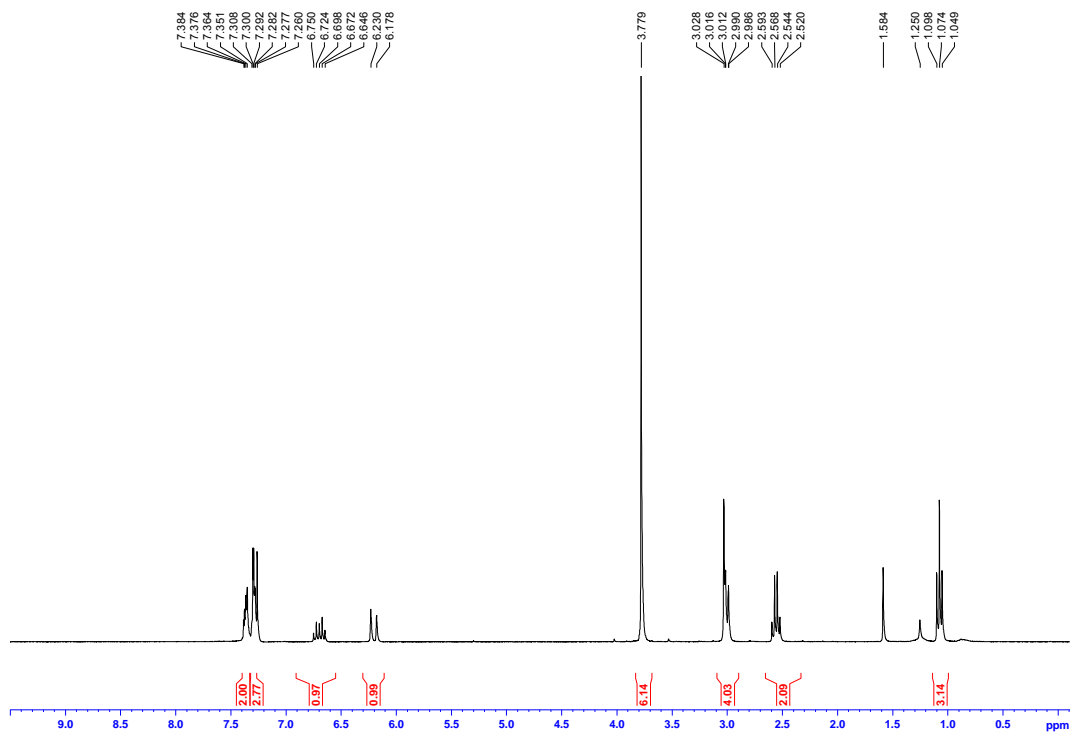

**$^{13}\text{C}$  NMR (75 MHz,  $\text{CDCl}_3$ ) (S15):**

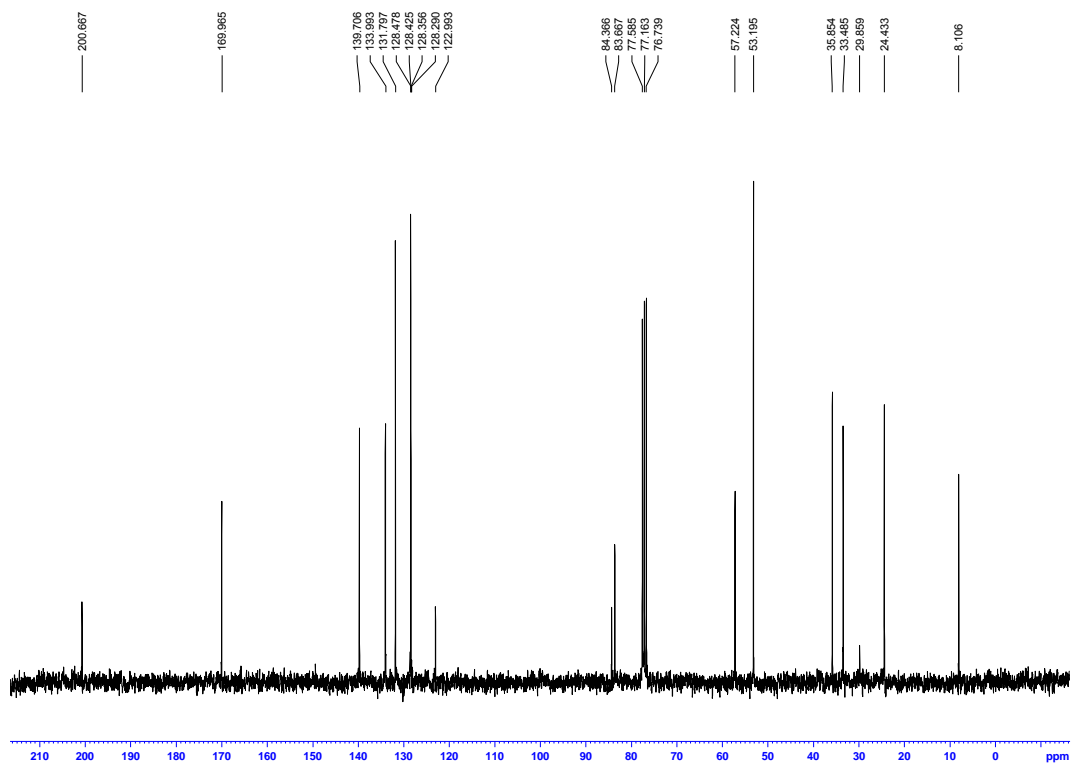

**$^1\text{H}$  NMR (300 MHz,  $\text{CDCl}_3$ ) (4-major diastereoisomer):**

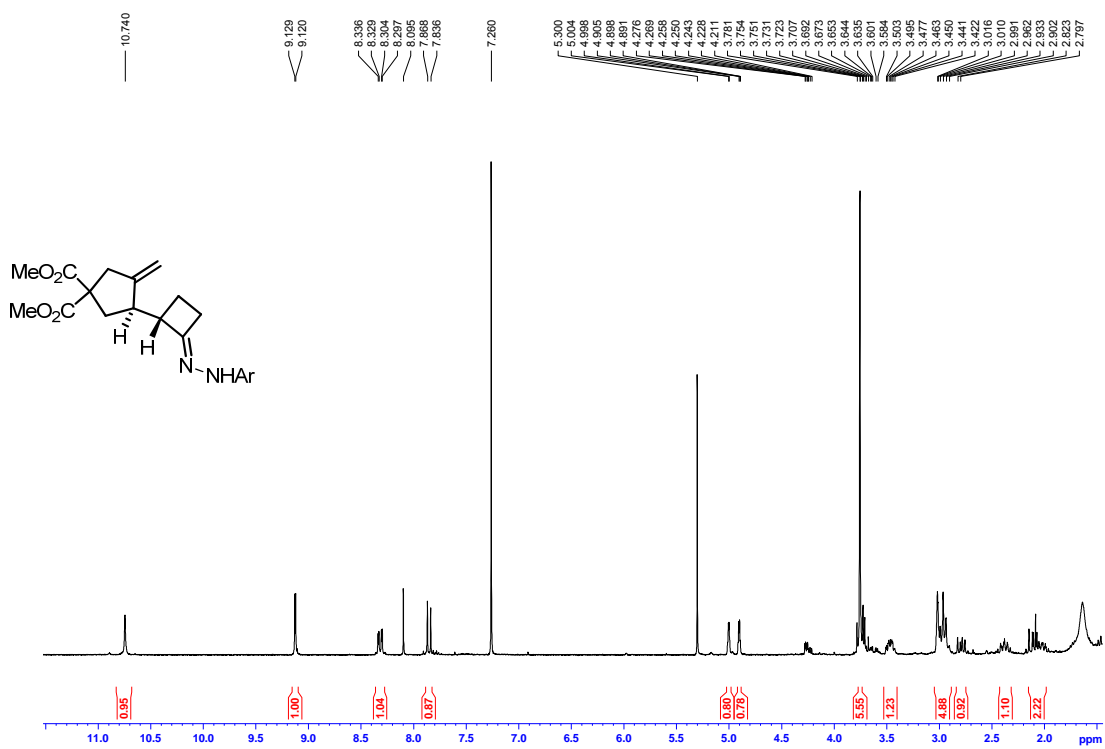



<sup>13</sup>C NMR (75 MHz, CDCl<sub>3</sub>) (4-major diastereoisomer):

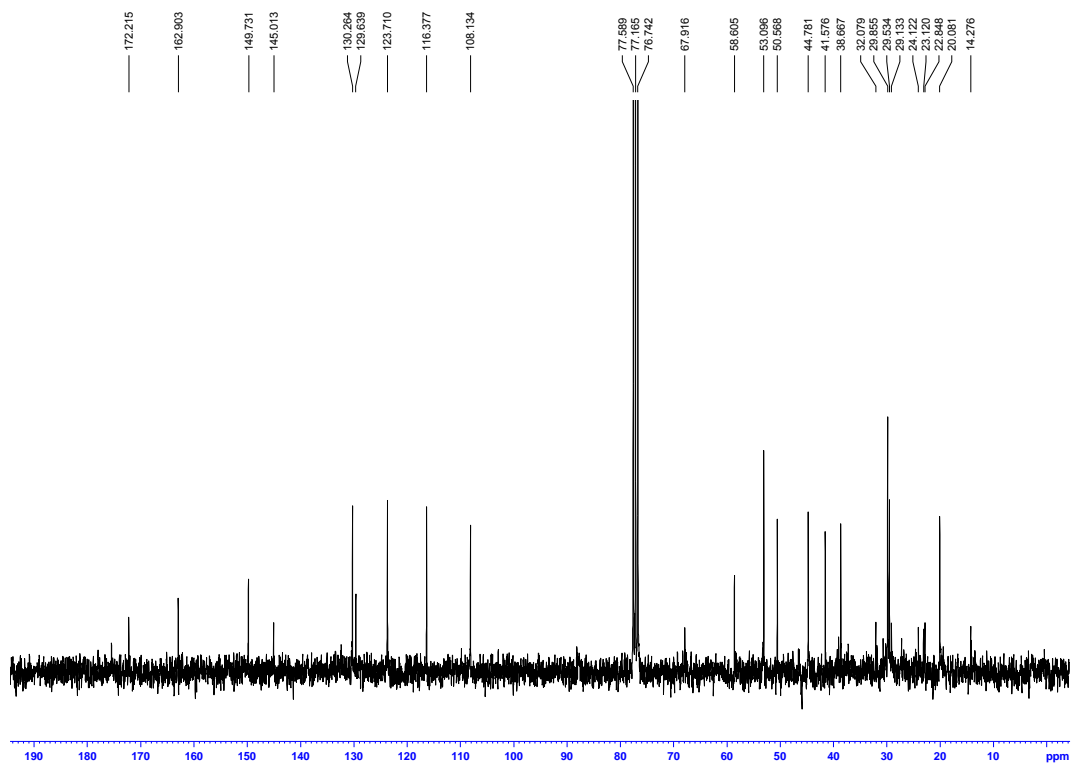

<sup>1</sup>H NMR (300 MHz, CDCl<sub>3</sub>) (4-minor diastereoisomer):

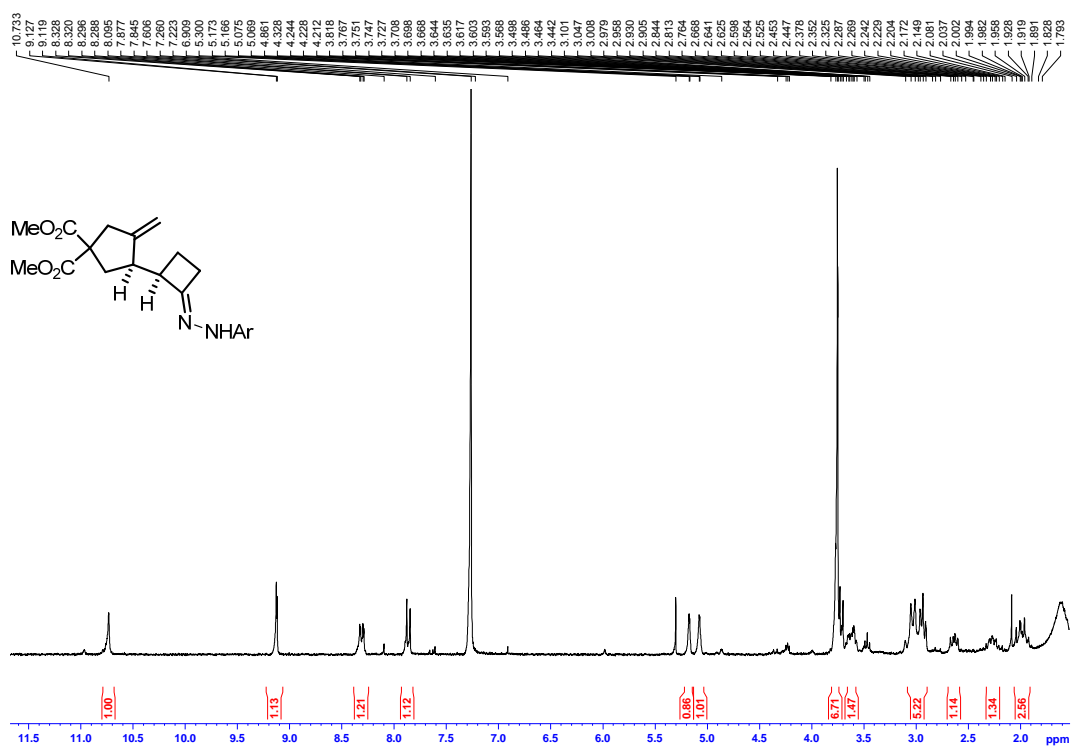

**$^{13}\text{C}$  NMR (75 MHz,  $\text{CDCl}_3$ ) (4-minor diastereoisomer):**

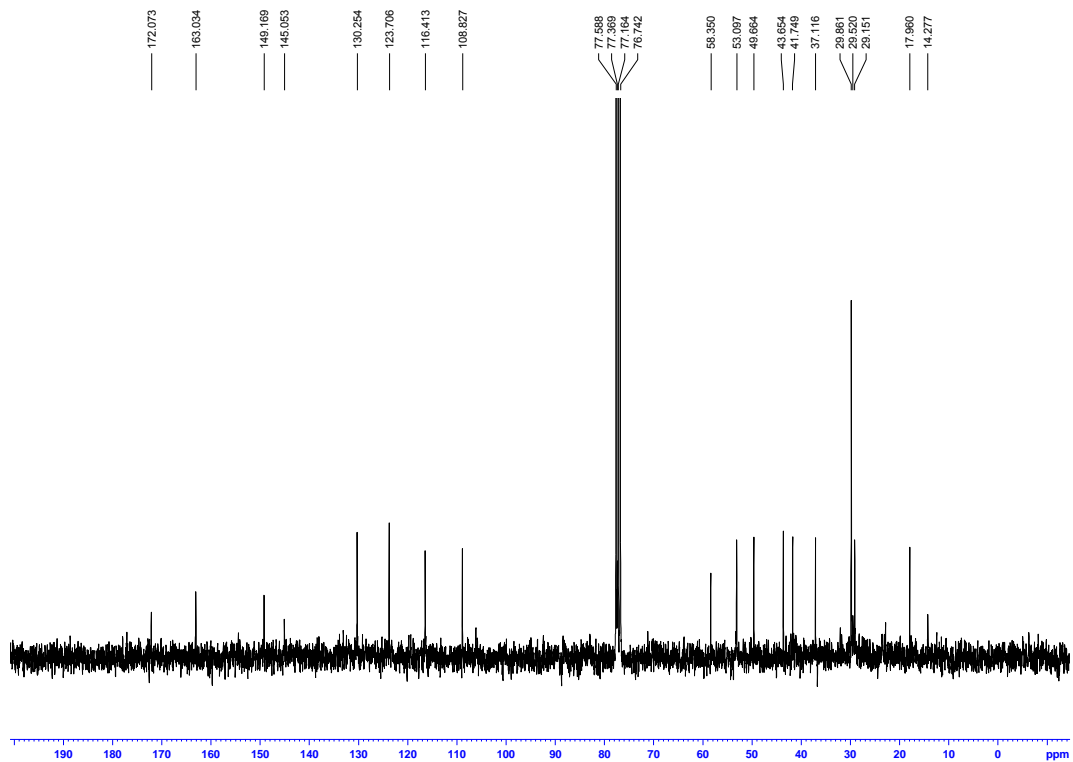

**$^1\text{H}$  NMR (300 MHz,  $\text{CDCl}_3$ ) (5a):**

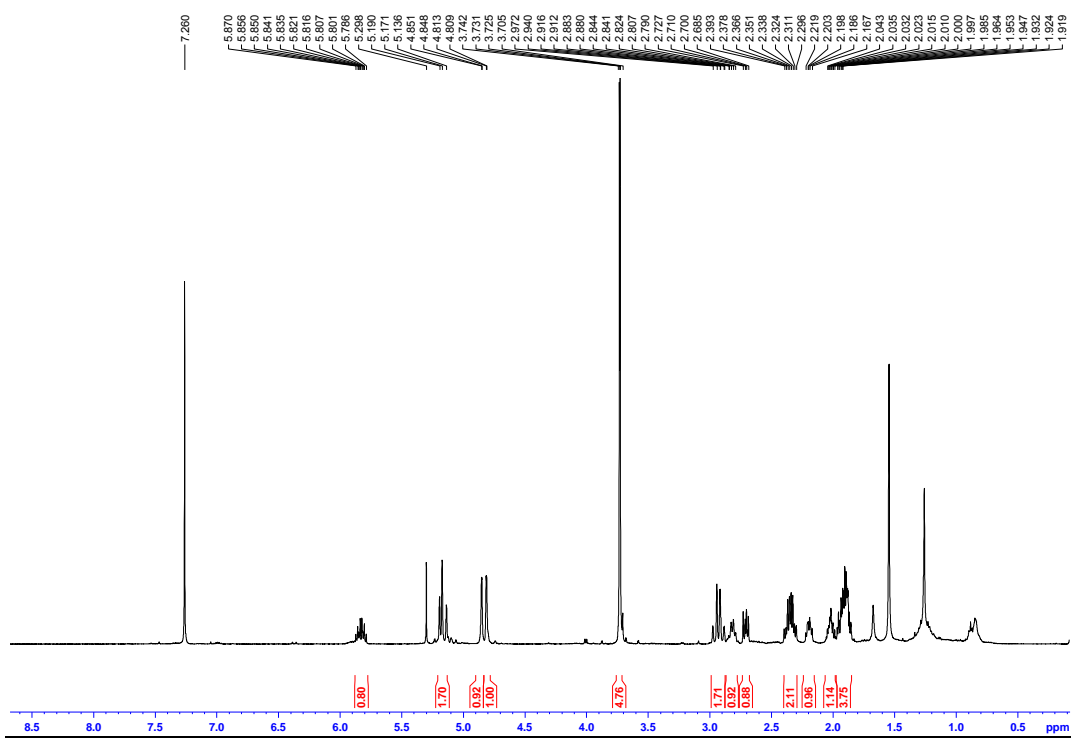

$^{13}\text{C}$  NMR (75 MHz,  $\text{CDCl}_3$ ) (5a):

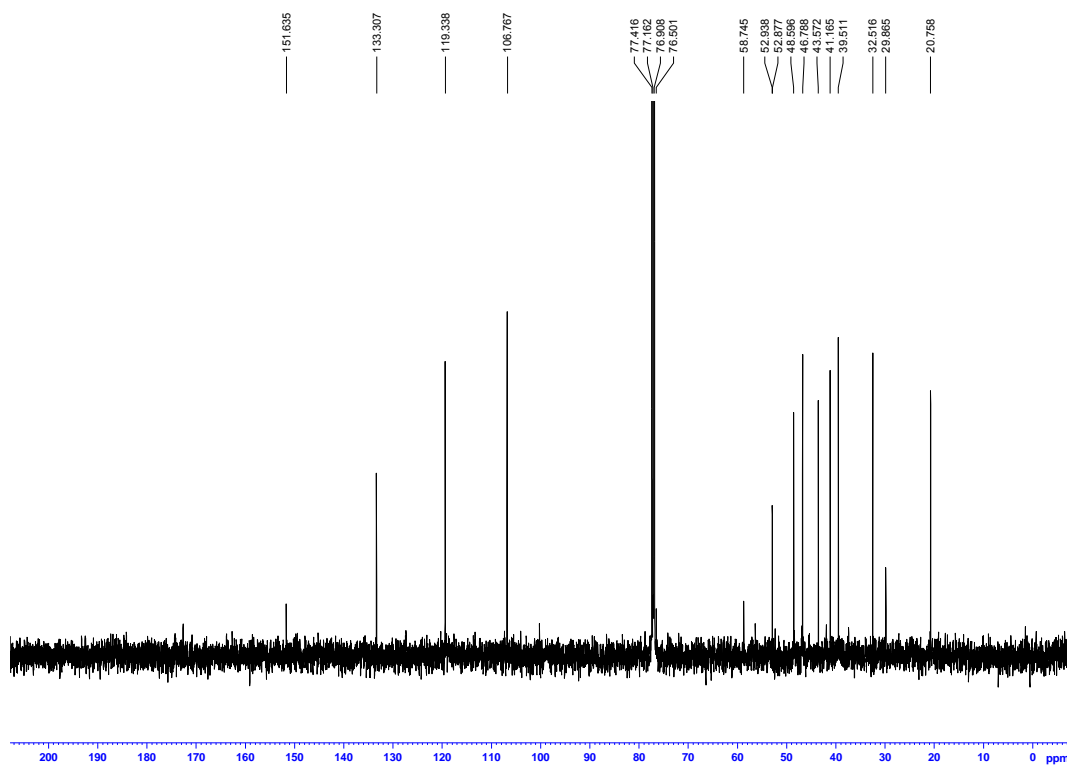

$^1\text{H}$  NMR (500 MHz,  $\text{CDCl}_3$ ) (5b):

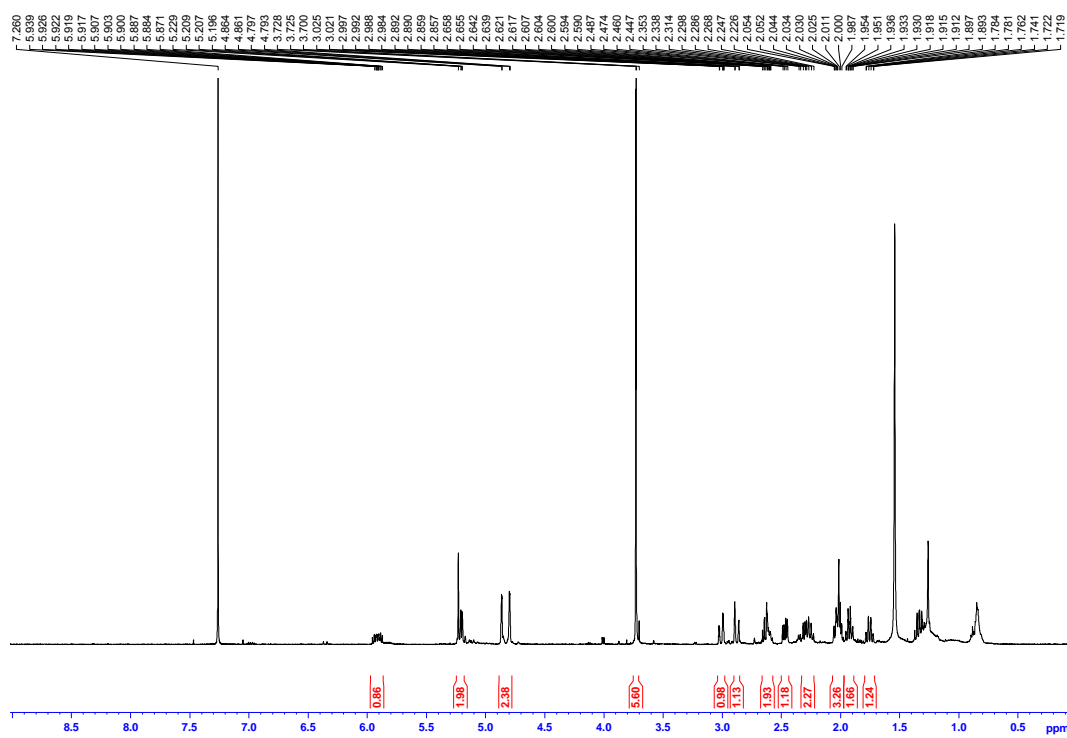

$^{13}\text{C}$  NMR (75 MHz,  $\text{CDCl}_3$ ) (5b):

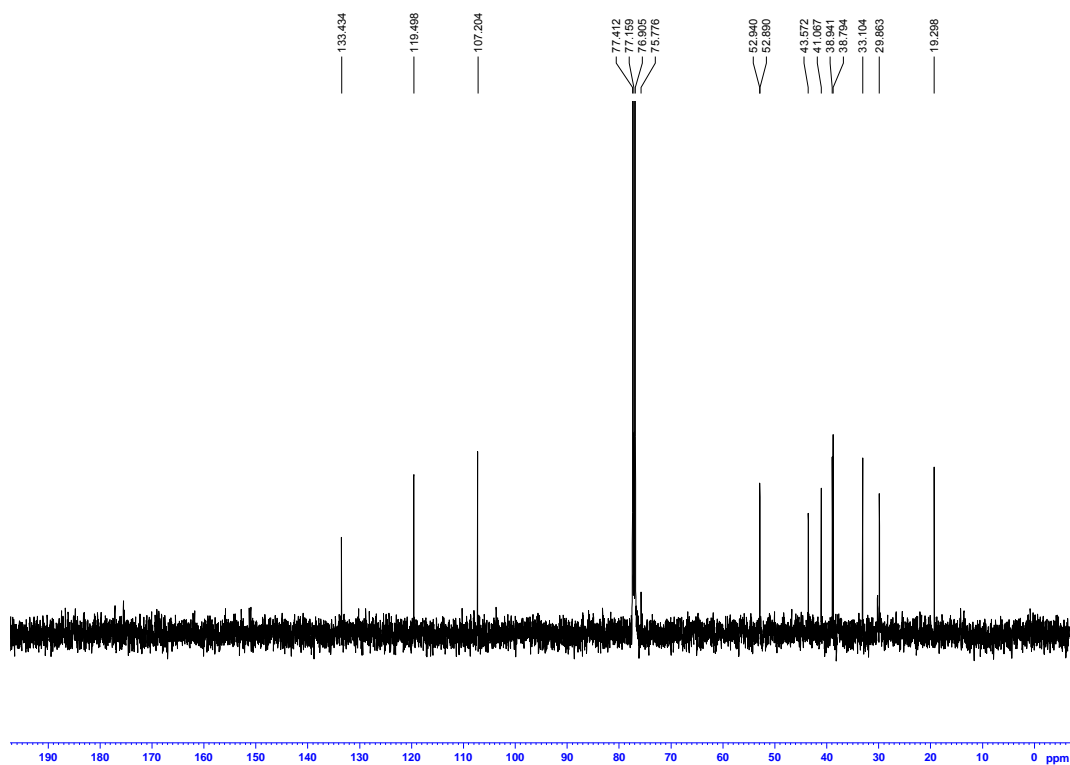

$^1\text{H}$  NMR (300 MHz,  $\text{CDCl}_3$ ) (6b):

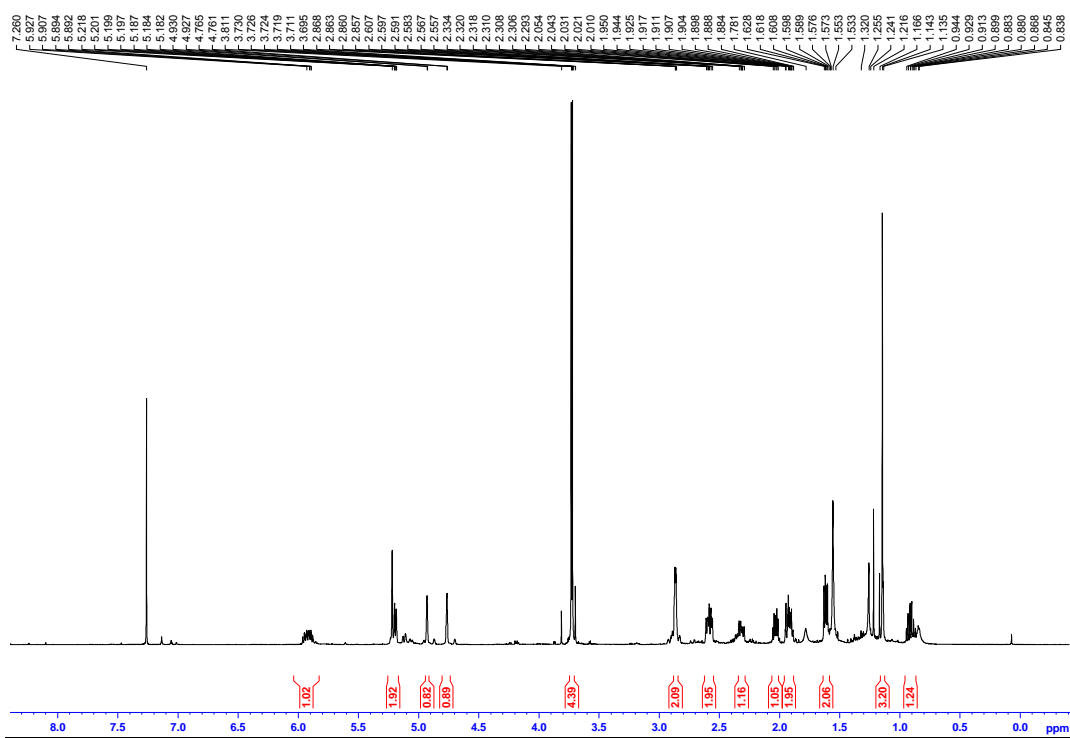

**$^{13}\text{C}$  NMR (75 MHz,  $\text{CDCl}_3$ ) (6b):**

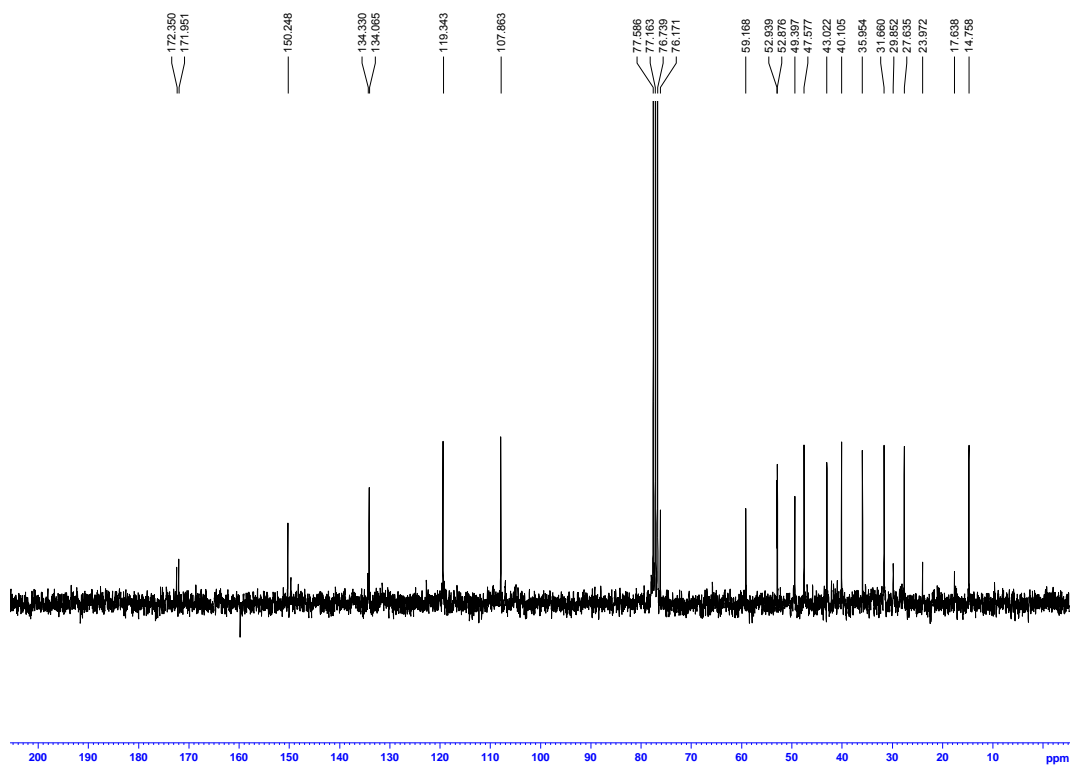

**$^1\text{H}$  NMR (300 MHz,  $\text{CDCl}_3$ ) (7):**

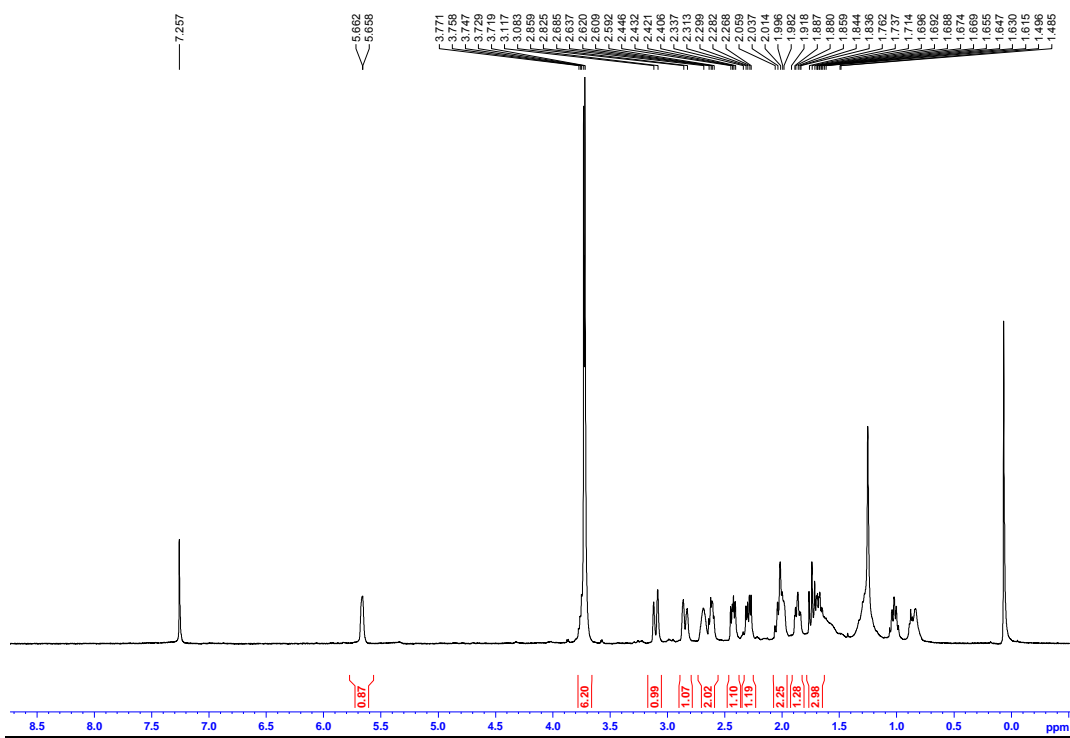

**$^{13}\text{C}$  NMR (75 MHz,  $\text{CDCl}_3$ ) (7):**

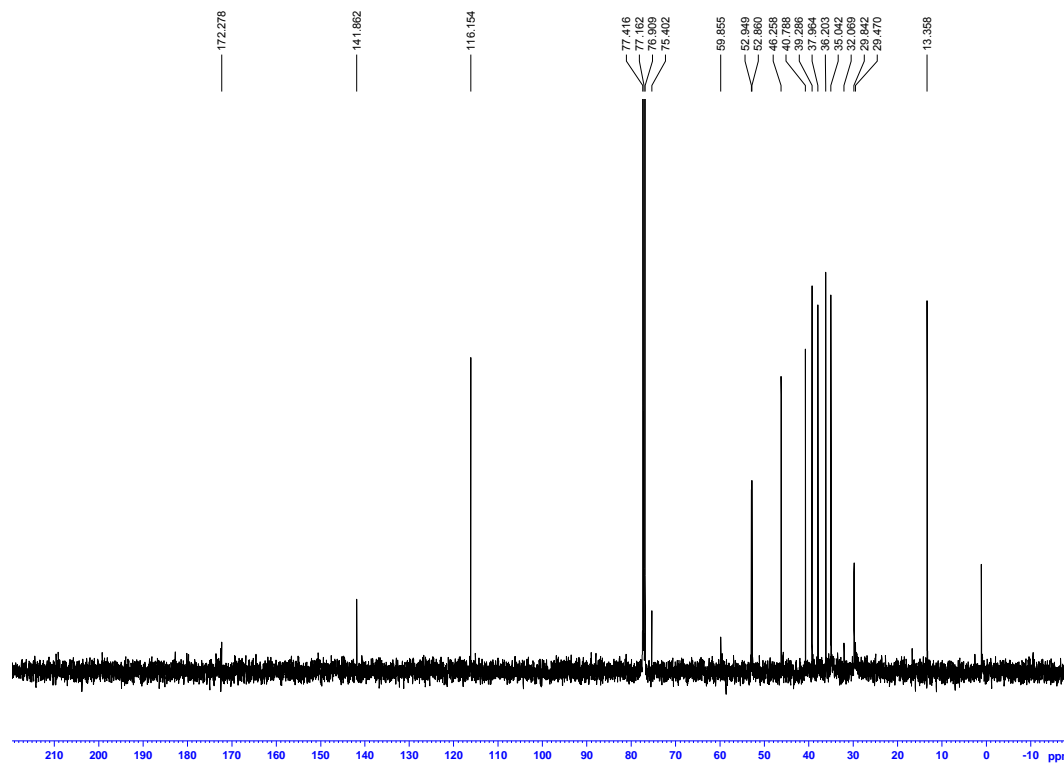

**$^1\text{H}$  NMR (500 MHz,  $\text{CDCl}_3$ ) (8):**

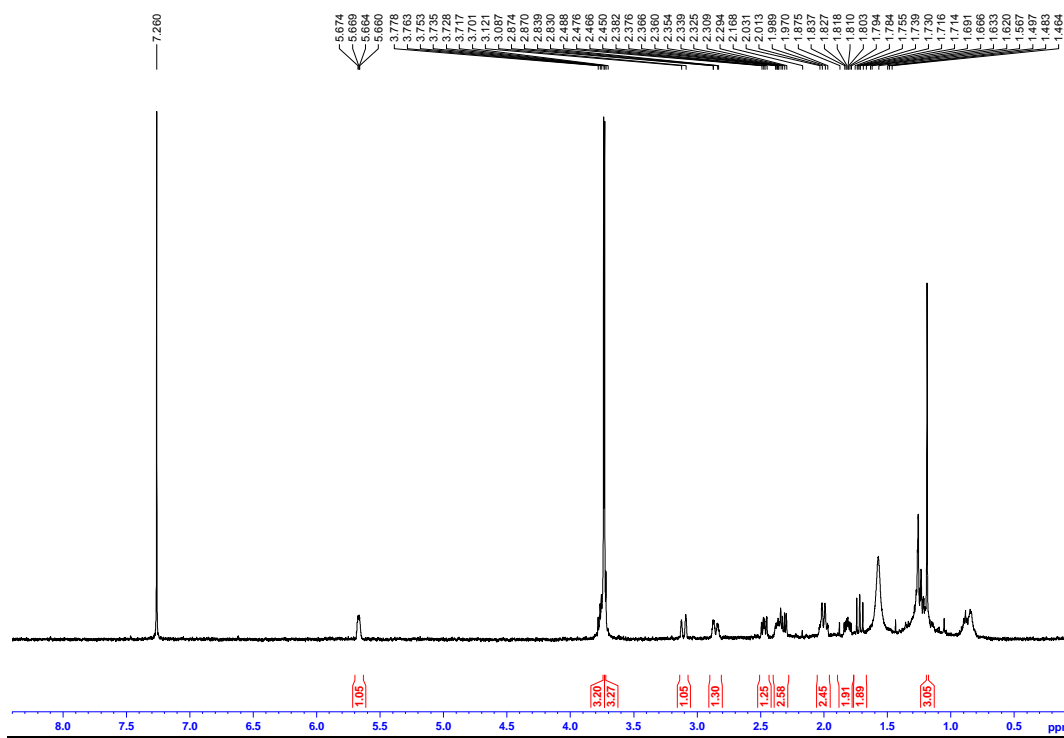

$^{13}\text{C}$  NMR (125 MHz,  $\text{CDCl}_3$ ) (8):

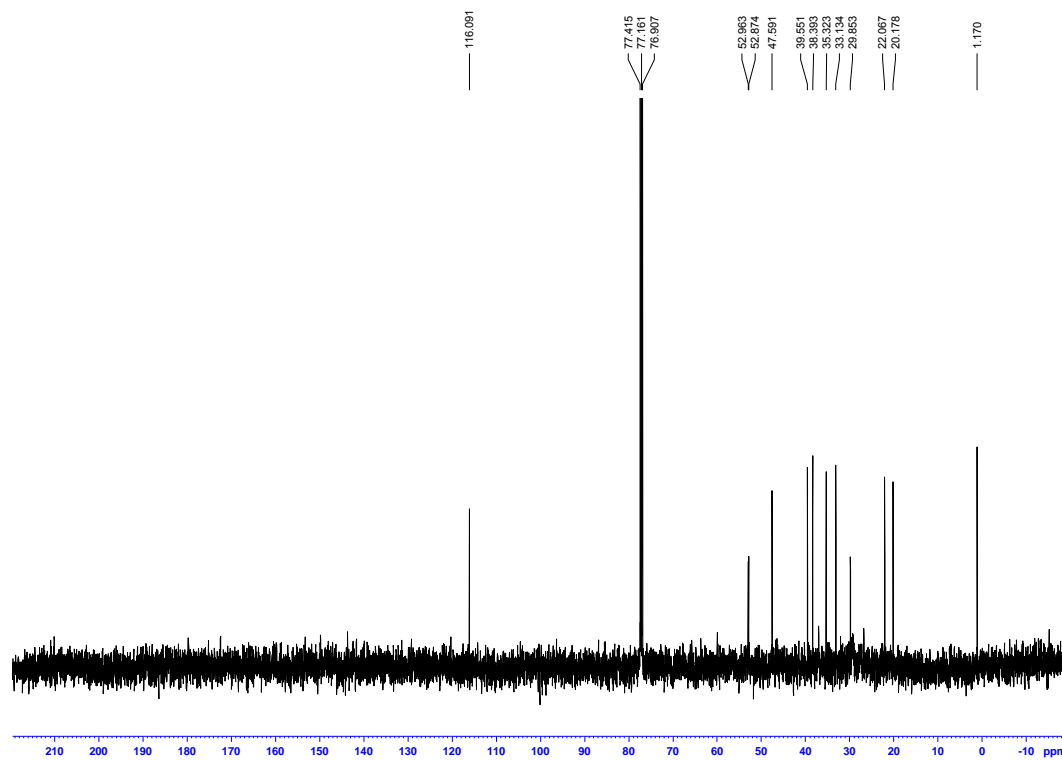

$^1\text{H}$  NMR (500 MHz,  $\text{CDCl}_3$ ) (S16):

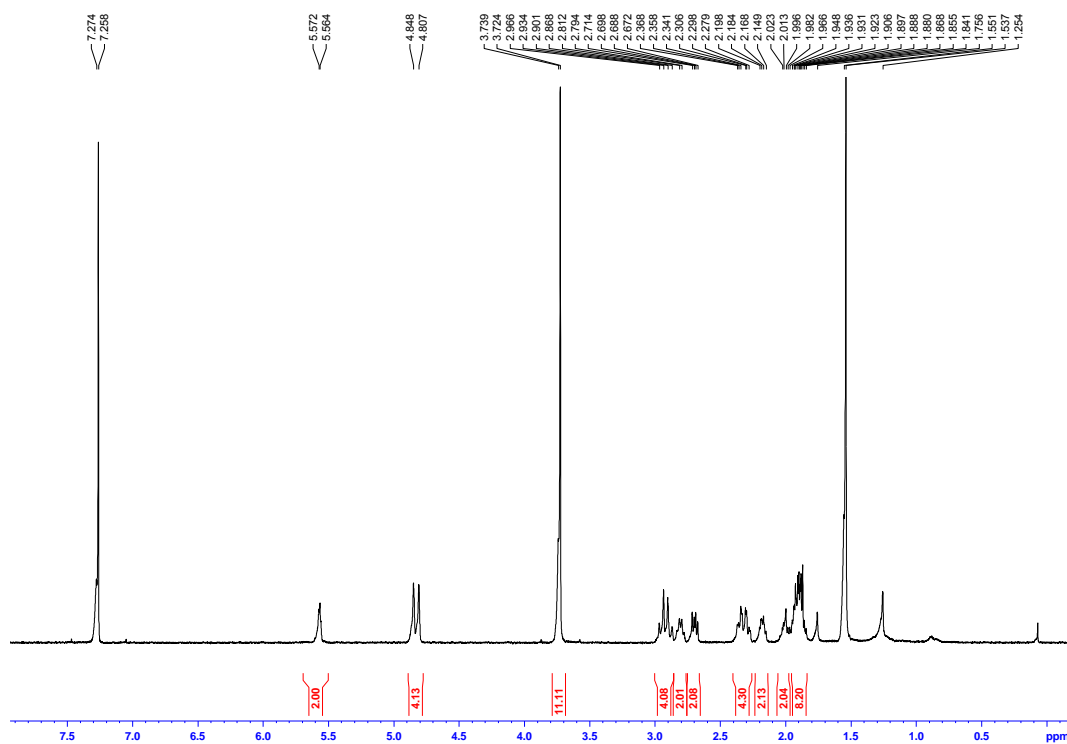

## IV. HPLC Data.

### IV. (*cis*-**3a** and *trans*-**3a**)

HPLC Analysis: major diastereoisomer: 99% ee, minor diastereoisomer: 95% ee [CHIRALPAK® IC, 25 °C, 6% *i*PrOH/*n*-heptane, 1 mL/min, 210 nm, retention times: minor diastereoisomer, 23.5 min (minor) and 38.5 min (major)]; major diastereoisomer, 45.1 min (major) and 47.8 min (minor)].

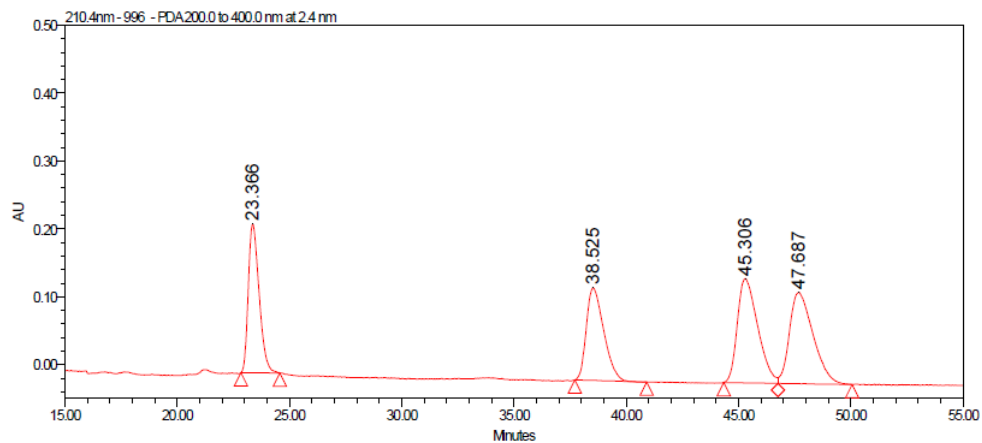

Peak Results

|   | RT     | Height | Area    | %Area |
|---|--------|--------|---------|-------|
| 1 | 23.366 | 219291 | 7335806 | 21.45 |
| 2 | 38.525 | 136314 | 7347438 | 21.48 |
| 3 | 45.306 | 153550 | 9678718 | 28.30 |
| 4 | 47.687 | 134638 | 9844450 | 28.78 |

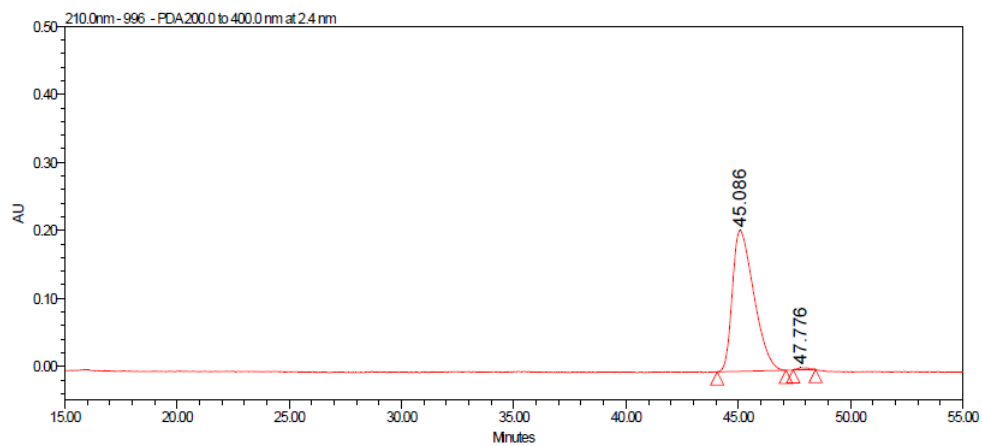

Peak Results

|   | RT     | Height | Area     | %Area |
|---|--------|--------|----------|-------|
| 1 | 45.086 | 208271 | 13794887 | 99.30 |
| 2 | 47.776 | 2947   | 97738    | 0.70  |



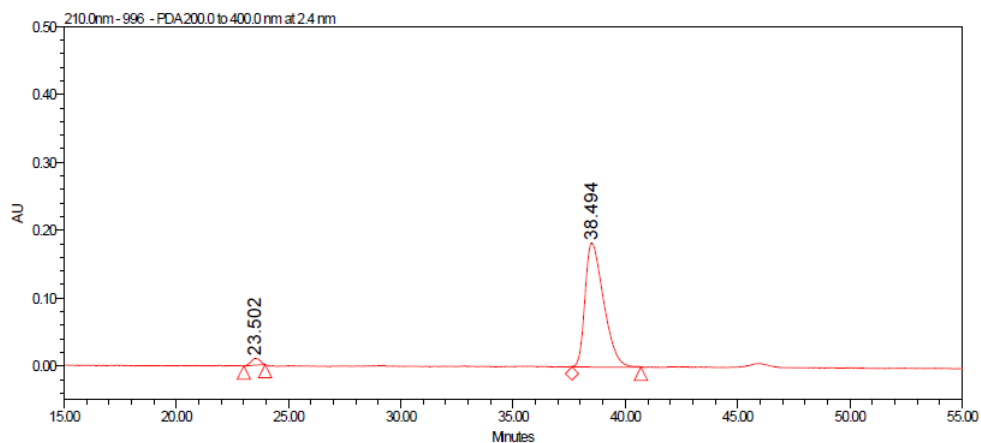

**Peak Results**

|   | RT     | Height | Area     | %Area |
|---|--------|--------|----------|-------|
| 1 | 23.502 | 9960   | 276246   | 2.57  |
| 2 | 38.494 | 182658 | 10489496 | 97.43 |

### Synthesis of product 3a from OTBS Substrate 1j.

HPLC Analysis: 97% ee, [CHIRALPAK® IC, 25 °C, 6% *i*PrOH/*n*-heptane, 1 mL/min, 210 nm, retention times: 45.4 min (major) and 48.2 min (minor)]

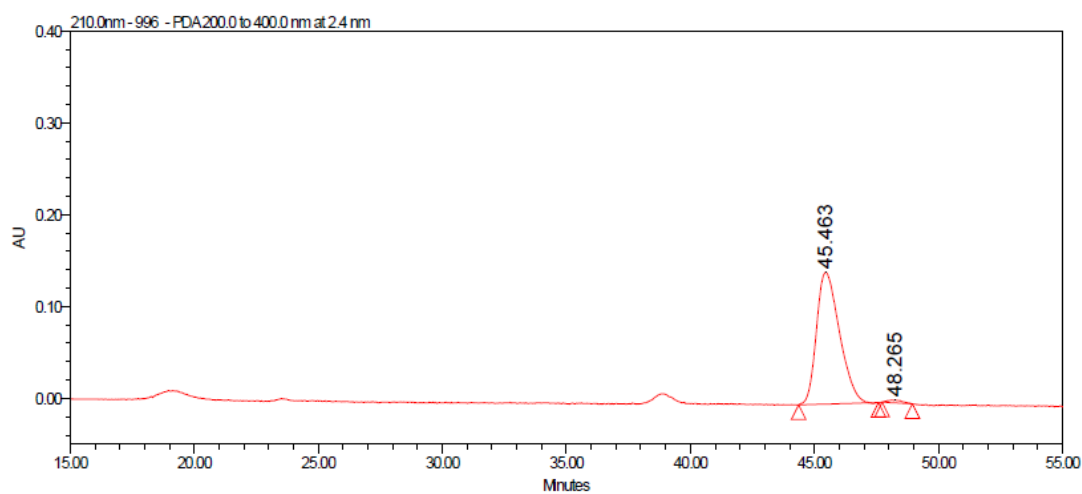

**Peak Results**

|   | RT     | Height | Area    | %Area |
|---|--------|--------|---------|-------|
| 1 | 45.463 | 143960 | 9255744 | 98.64 |
| 2 | 48.265 | 3317   | 127944  | 1.36  |

**(cis-3b and trans-3b)**

HPLC Analysis: major diastereoisomer: 98% ee, minor diastereoisomer: 95% ee [CHIRALPAK® IC, 25 °C, 4% *i*PrOH/*n*-heptane, 1 mL/min, 210 nm, retention times: minor diastereoisomer, 19.7 min (minor) and 27.7 min (major)]; major diastereoisomer, 30.2 min (minor) and 32.8 min (major)].

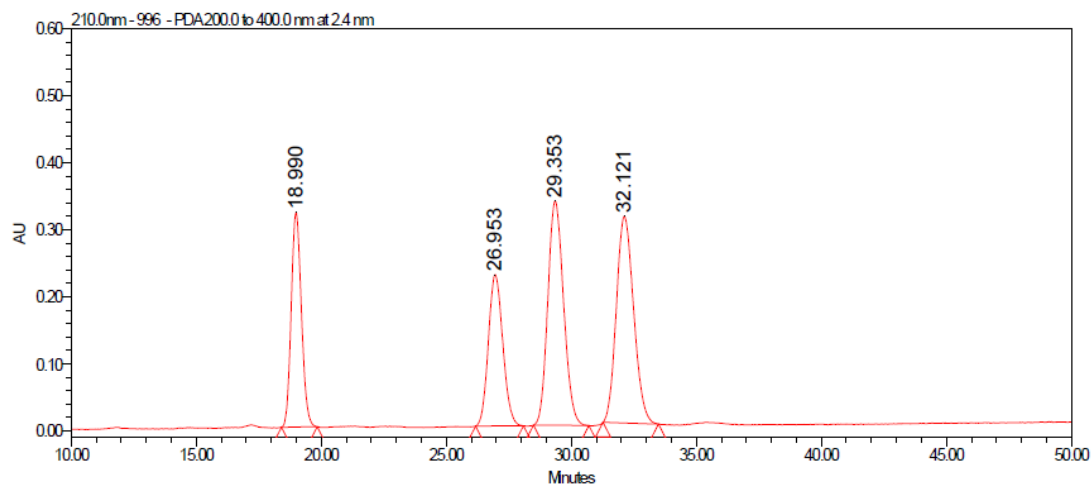

**Peak Results**

|   | RT     | Height | Area     | %Area |
|---|--------|--------|----------|-------|
| 1 | 18.990 | 320061 | 9041997  | 18.99 |
| 2 | 26.953 | 225664 | 9056874  | 19.02 |
| 3 | 29.353 | 334656 | 14689801 | 30.85 |
| 4 | 32.121 | 308667 | 14826438 | 31.14 |

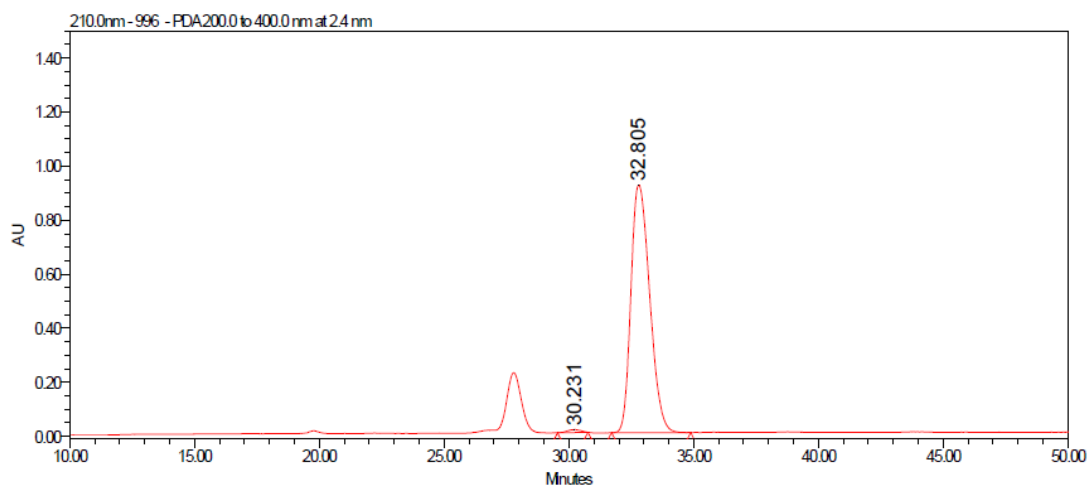

**Peak Results**

|   | RT     | Height | Area     | %Area |
|---|--------|--------|----------|-------|
| 1 | 30.231 | 11104  | 404220   | 0.84  |
| 2 | 32.805 | 917660 | 47967605 | 99.16 |

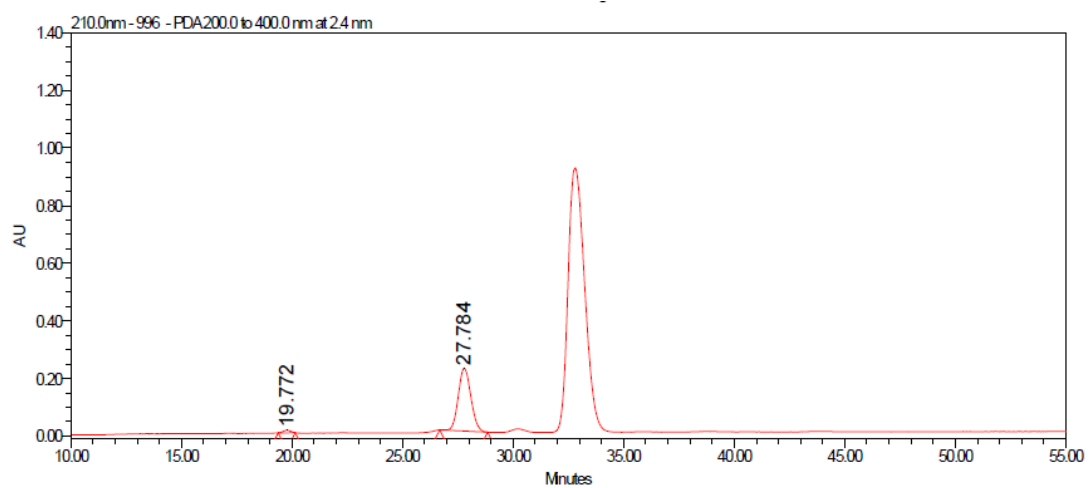

Peak Results

|   | RT     | Height | Area    | %Area |
|---|--------|--------|---------|-------|
| 1 | 19.772 | 9030   | 211823  | 2.40  |
| 2 | 27.784 | 218293 | 6619215 | 97.60 |

**(cis-3c)**

HPLC Analysis: 99% ee, [CHIRALPAK® IC, 25 °C, 6% *i*PrOH/*n*-heptane, 1 mL/min, 210 nm, retention times: 37.0 min (major) and 42.4 min (minor)]

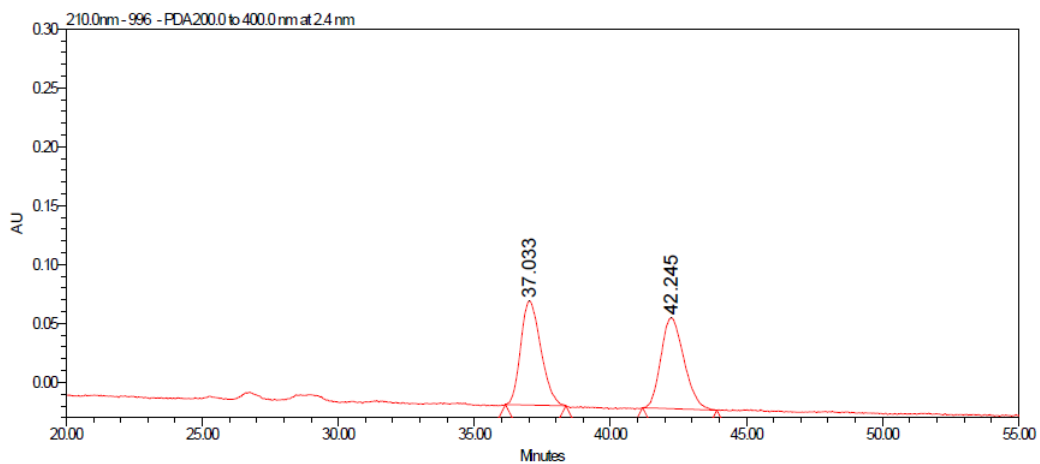

| Peak Results |        |        |         |       |
|--------------|--------|--------|---------|-------|
|              | RT     | Height | Area    | %Area |
| 1            | 37.033 | 88257  | 4538958 | 49.95 |
| 2            | 42.245 | 77144  | 4547351 | 50.05 |

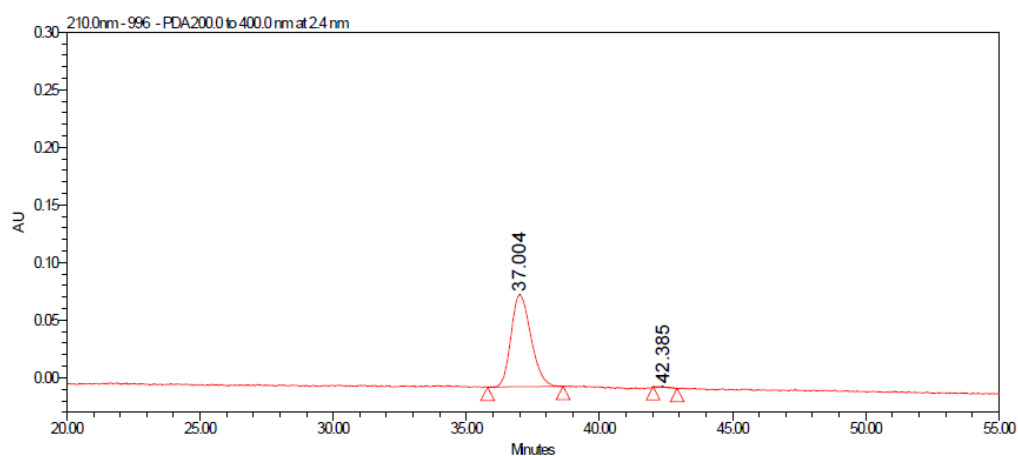

| Peak Results |        |        |         |       |
|--------------|--------|--------|---------|-------|
|              | RT     | Height | Area    | %Area |
| 1            | 37.004 | 80086  | 4139945 | 99.57 |
| 2            | 42.385 | 695    | 17960   | 0.43  |

**(cis-3d)**

HPLC Analysis: 99% ee, [CHIRALPAK® IC, 25 °C, 30% *i*PrOH/*n*-heptane, 0.8 mL/min, 218 nm, retention times: 10.7 min (major) and 11.9 min (minor)]

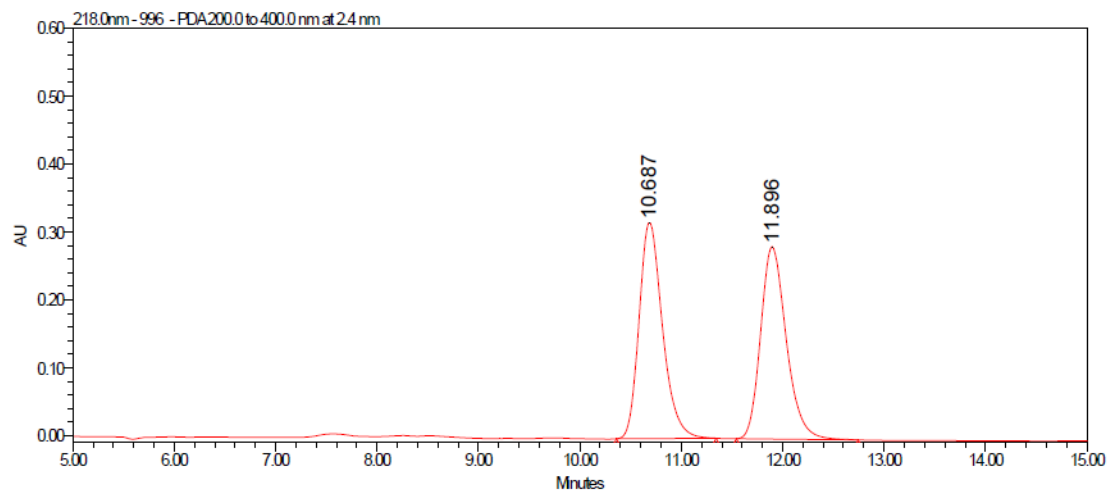

**Peak Results**

|   | RT     | Height | Area    | %Area |
|---|--------|--------|---------|-------|
| 1 | 10.687 | 319170 | 5102966 | 50.58 |
| 2 | 11.896 | 283357 | 4966922 | 49.42 |

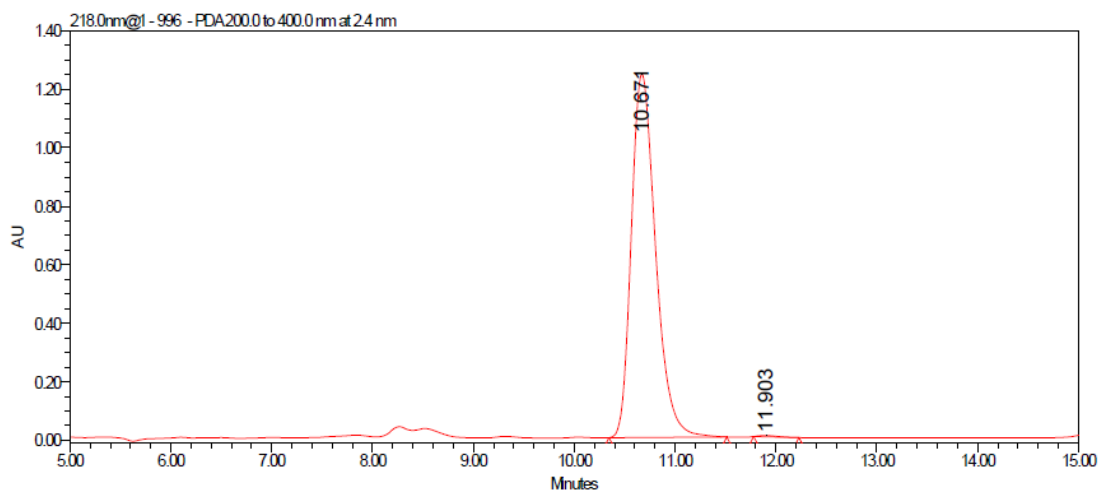

**Peak Results**

|   | RT     | Height  | Area     | %Area |
|---|--------|---------|----------|-------|
| 1 | 10.671 | 1242361 | 20773634 | 99.76 |
| 2 | 11.903 | 4407    | 50744    | 0.24  |

(*cis-3e* and *trans-3e*)

HPLC Analysis: major diastereoisomer: 89% ee, minor diastereoisomer: 92% ee [CHIRALPAK® IC, 25 °C, 6% *i*PrOH/*n*-heptane, 1 mL/min, 210 nm, retention times: major diastereoisomer, 18.2 min (minor) and 32.2 min (major); minor diastereoisomers, 23.2 min (major) and 26.7 min (minor)].

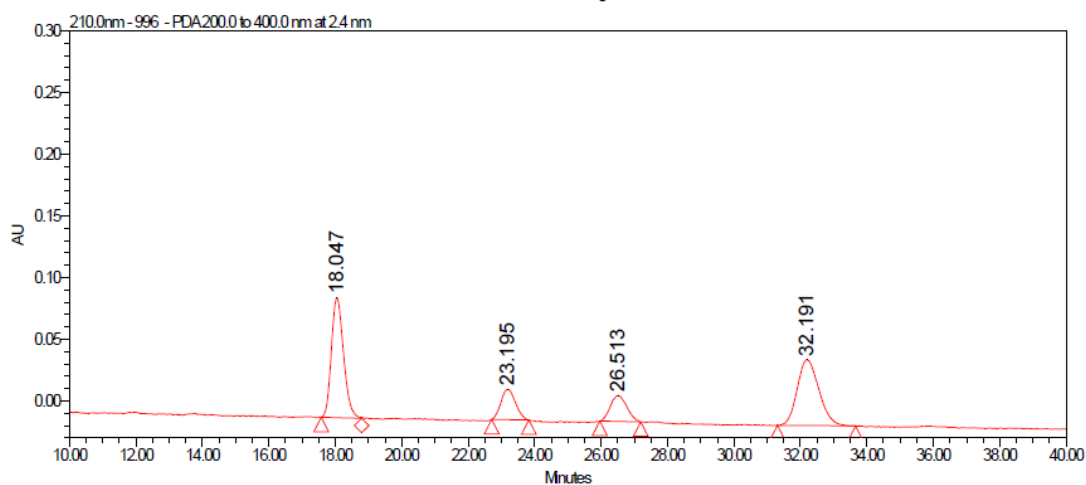

Peak Results

|   | RT     | Height | Area    | %Area |
|---|--------|--------|---------|-------|
| 1 | 18.047 | 97610  | 2465326 | 38.79 |
| 2 | 23.195 | 24689  | 746759  | 11.75 |
| 3 | 26.513 | 21064  | 719734  | 11.33 |
| 4 | 32.191 | 53458  | 2423229 | 38.13 |

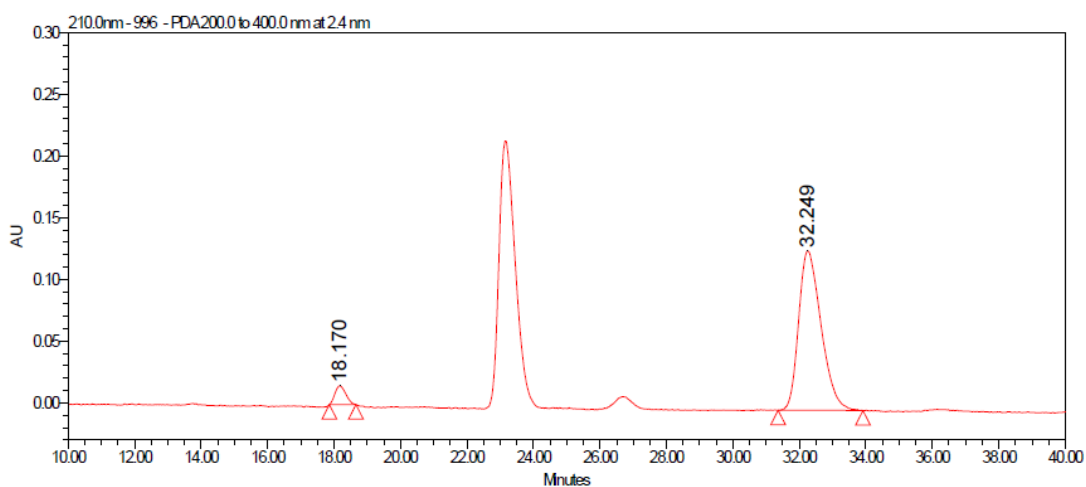

Peak Results

|   | RT     | Height | Area    | %Area |
|---|--------|--------|---------|-------|
| 1 | 18.170 | 15278  | 343955  | 5.38  |
| 2 | 32.249 | 129246 | 6053493 | 94.62 |

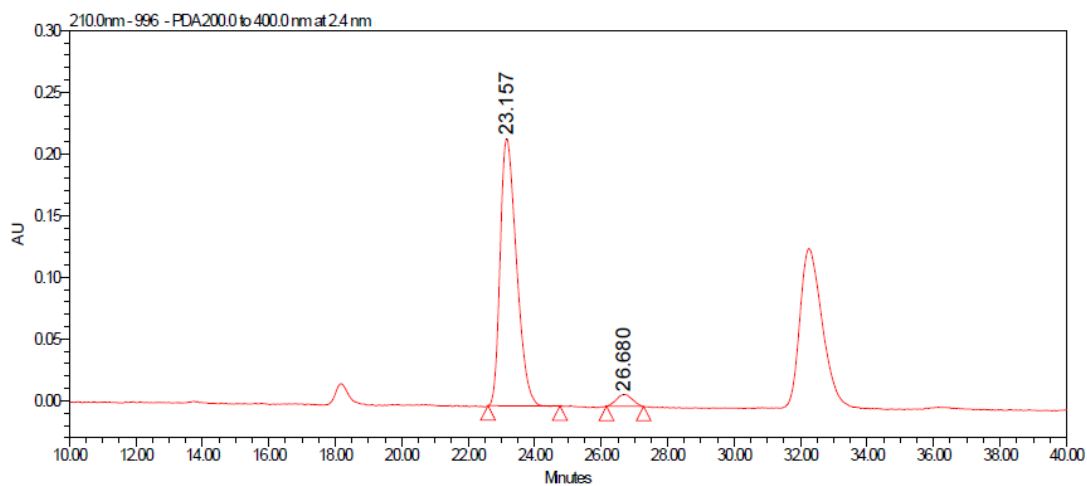

**Peak Results**

|   | RT     | Height | Area    | %Area |
|---|--------|--------|---------|-------|
| 1 | 23.157 | 216512 | 7363302 | 95.93 |
| 2 | 26.680 | 9518   | 312586  | 4.07  |

(*cis*-**3f** and *trans*-**3f**).

HPLC Analysis: major diastereoisomer: 87% ee, minor diastereoisomer: 75% ee [CHIRALPAK® IC, 25 °C, 2% *i*PrOH/*n*-heptane, 1 mL/min, 210 nm, retention times: minor diastereoisomer, 38.0 min (minor) and 40.3 min (major)]; major diastereoisomer, 46.2 min (minor) and 50.4 min (major)].

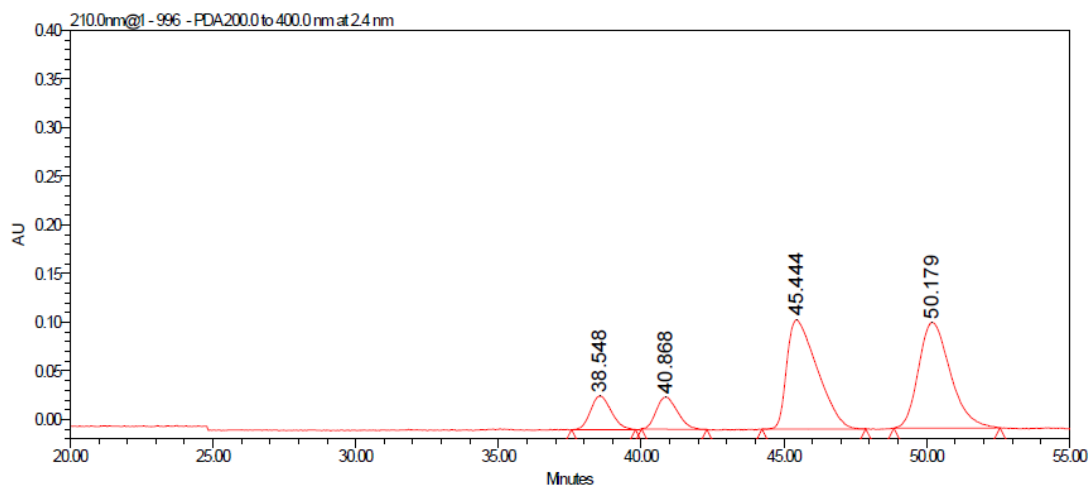

**Peak Results**

|   | RT     | Height | Area    | %Area |
|---|--------|--------|---------|-------|
| 1 | 38.548 | 34528  | 1731278 | 8.59  |
| 2 | 40.868 | 33114  | 1698572 | 8.43  |
| 3 | 45.444 | 112738 | 8298368 | 41.18 |
| 4 | 50.179 | 108738 | 8421591 | 41.79 |

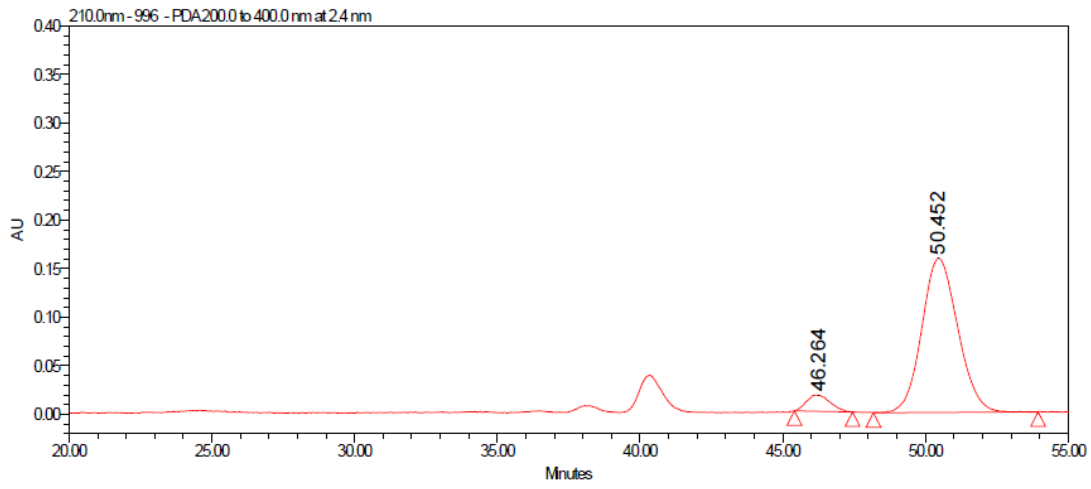

**Peak Results**

|   | RT     | Height | Area     | %Area |
|---|--------|--------|----------|-------|
| 1 | 46.264 | 16823  | 964561   | 6.48  |
| 2 | 50.452 | 158949 | 13916564 | 93.52 |

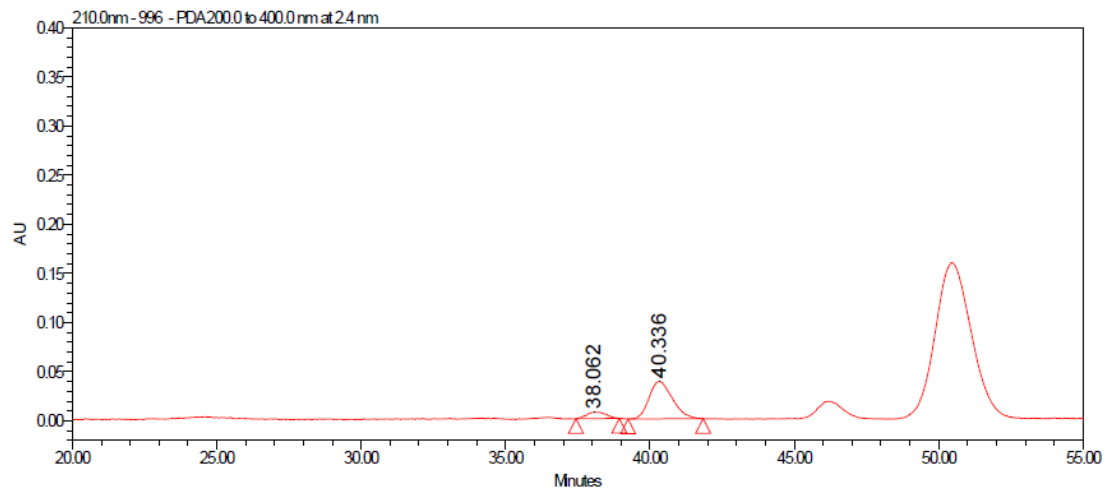

**Peak Results**

|   | RT     | Height | Area    | %Area |
|---|--------|--------|---------|-------|
| 1 | 38.062 | 6811   | 307365  | 12.62 |
| 2 | 40.336 | 38121  | 2127681 | 87.38 |



(*cis*-**3g** and *trans*-**3g**).

(*cis*-**3g**) major diastereoisomer:

74% ee, [CHIRALPAK® ID, 35 °C, 35% *i*PrOH/*n*-heptane, 0.7 mL/min, 222 nm, retention times: 45.7 min (minor) and 50.3 min (major)].

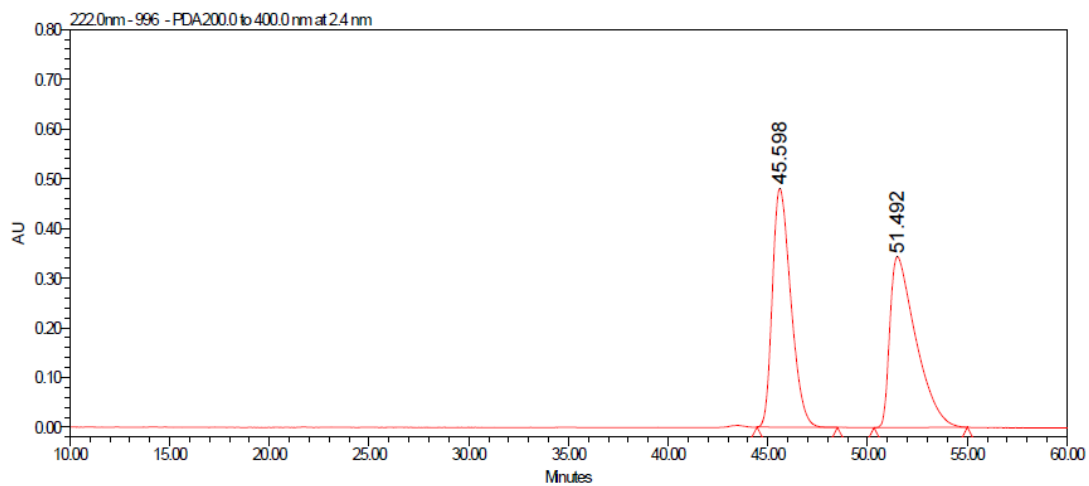

Peak Results

|   | RT     | Height | Area     | %Area |
|---|--------|--------|----------|-------|
| 1 | 45.598 | 480583 | 30907195 | 49.83 |
| 2 | 51.492 | 343905 | 31115378 | 50.17 |

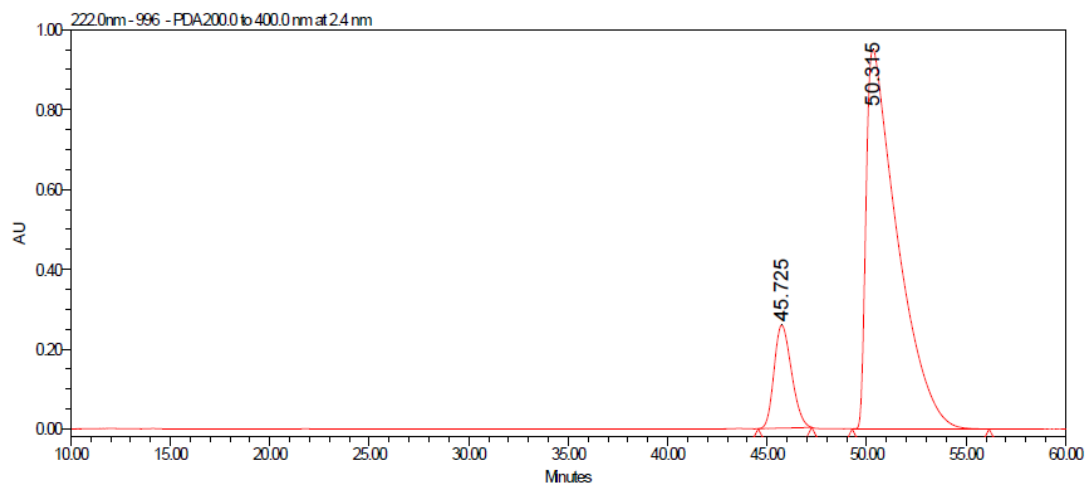

Peak Results

|   | RT     | Height | Area      | %Area |
|---|--------|--------|-----------|-------|
| 1 | 45.725 | 258341 | 15693048  | 13.13 |
| 2 | 50.315 | 950815 | 103845357 | 86.87 |

(*trans*-**3g**) minor diastereoisomer:

95% ee [CHIRALPAK® ID, 35 °C, 35% *i*PrOH/*n*-heptane, 0.7 mL/min, 222 nm, retention times: 34.9 min (minor) and 45.1 min (major)].

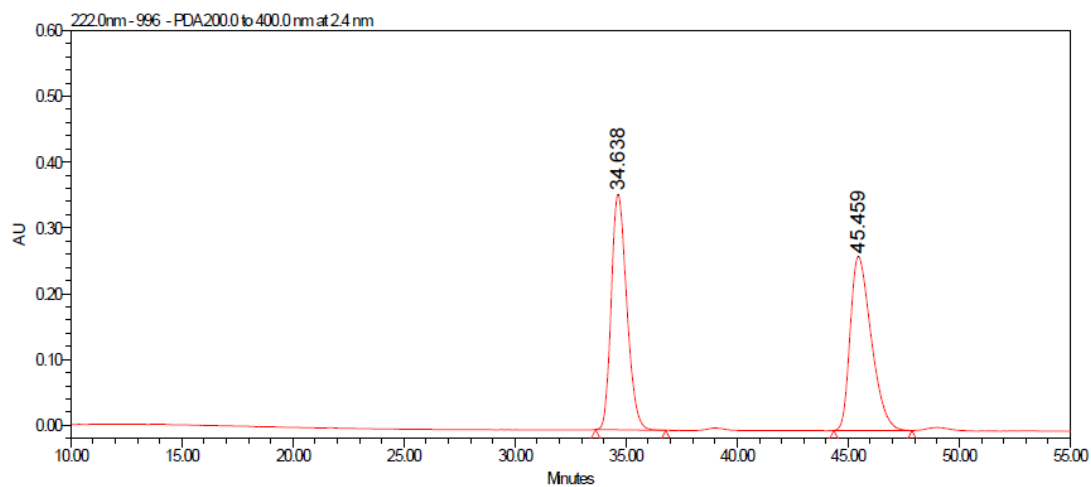

Peak Results

|   | RT     | Height | Area     | %Area |
|---|--------|--------|----------|-------|
| 1 | 34.638 | 357754 | 17339900 | 49.93 |
| 2 | 45.459 | 264220 | 17388851 | 50.07 |

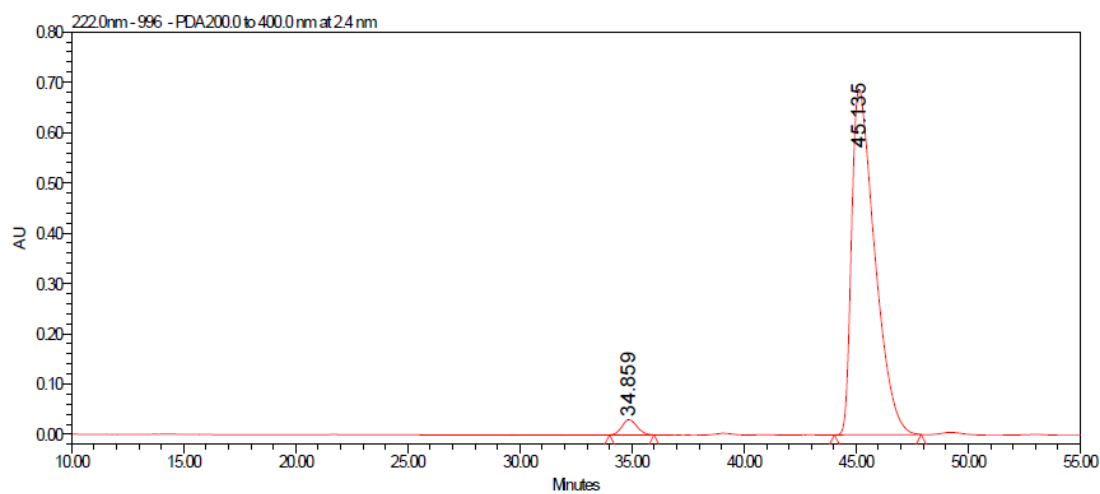

Peak Results

|   | RT     | Height | Area     | %Area |
|---|--------|--------|----------|-------|
| 1 | 34.859 | 30201  | 1415444  | 2.79  |
| 2 | 45.135 | 686325 | 49302735 | 97.21 |

(*cis*-**3h**) :

HPLC Analysis: 91% ee, [CHIRALPAK® IC, 35 °C, 40% EtOH/*n*-heptane, 0.7 mL/min, 222 nm, retention times: 30.8 min (major) and 38.9 min (minor)].

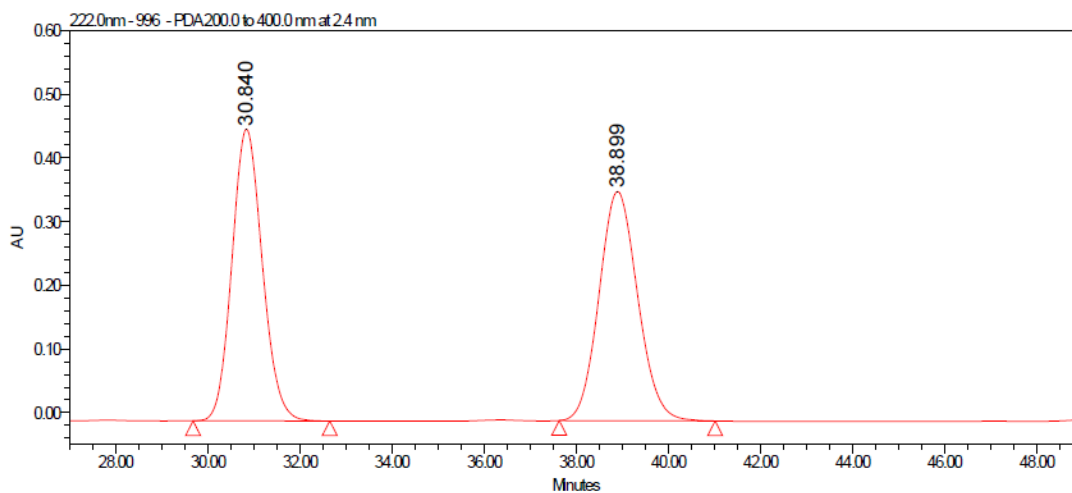

| Peak Results |        |        |          |       |
|--------------|--------|--------|----------|-------|
|              | RT     | Height | %Area    |       |
| 1            | 30.840 | 457883 | 20981806 | 50.00 |
| 2            | 38.899 | 359686 | 20979251 | 50.00 |

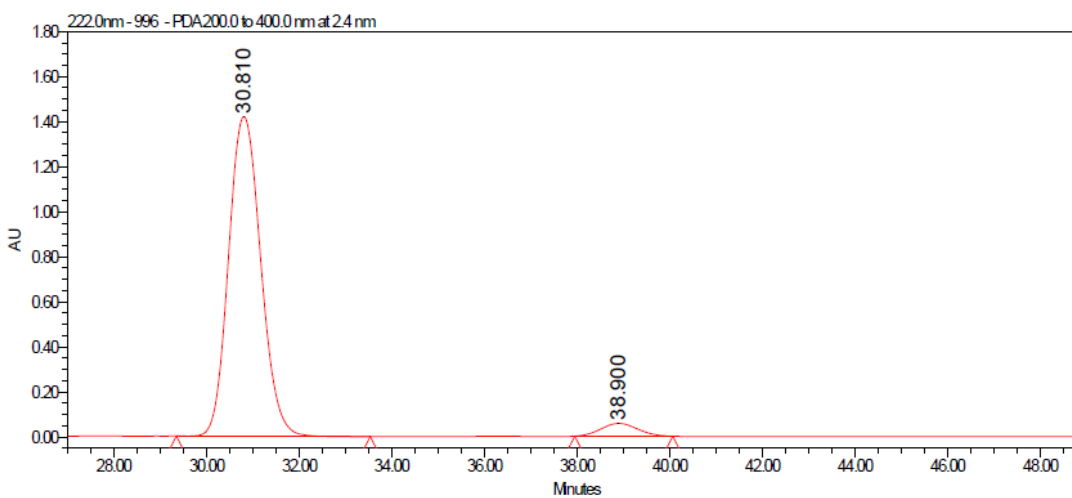

| Peak Results |        |         |          |       |
|--------------|--------|---------|----------|-------|
|              | RT     | Height  | %Area    |       |
| 1            | 30.810 | 1419065 | 68499773 | 95.63 |
| 2            | 38.900 | 56877   | 3127967  | 4.37  |

(*cis-3i* and *trans-3i*).

SFC Analysis: major diastereoisomers: 87% ee, minor diastereoisomers: 85% ee [CHIRAL SFC AD-H, 30 °C, 5% MeOH/CO<sub>2</sub>, 4 mL/min, pressure: 150 bar, 214 nm, retention times: minor diastereoisomers, 8.3 min (major) and 9.5 min (minor)]; major diastereoisomers, 7.0 min (major) and 14.3 min (minor)].

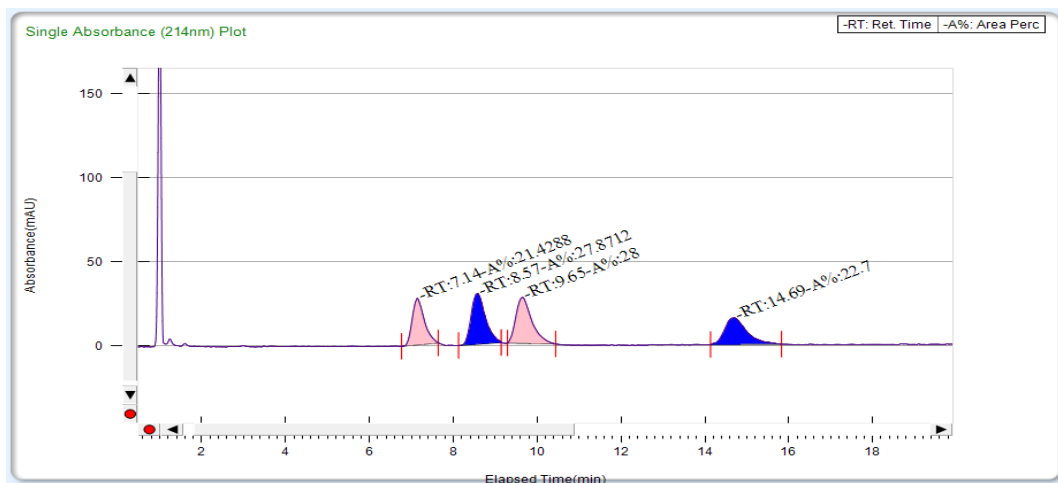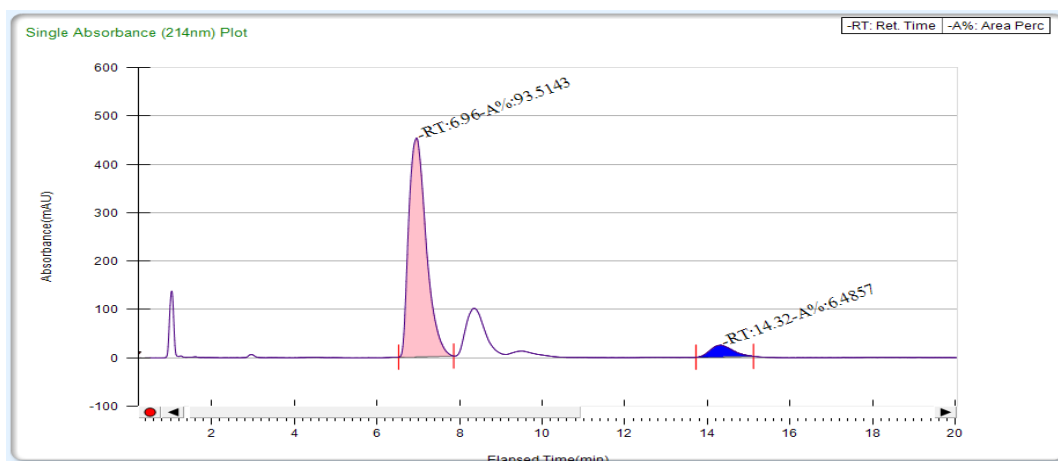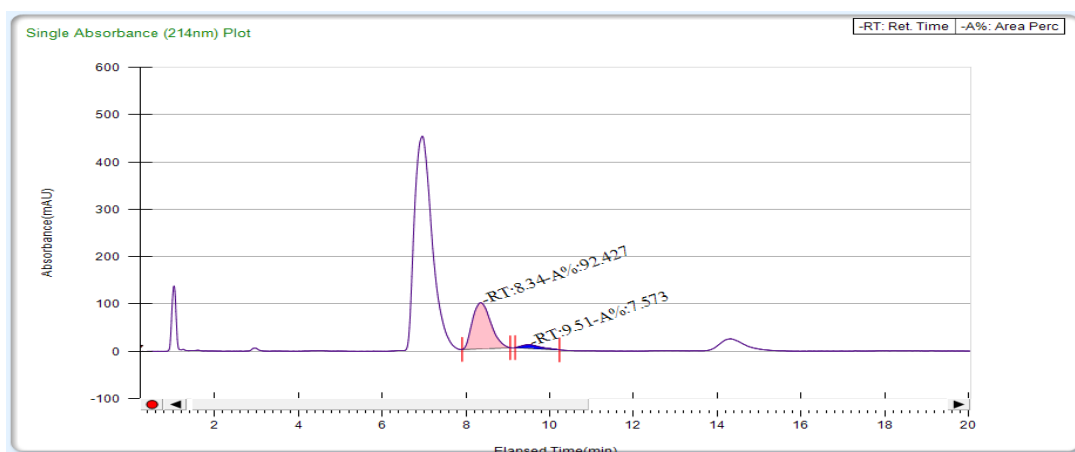

## V. X-Ray crystal structure determination of compound 4

The Ortep drawing of 4. (one conformer without disorder is shown for clarity).

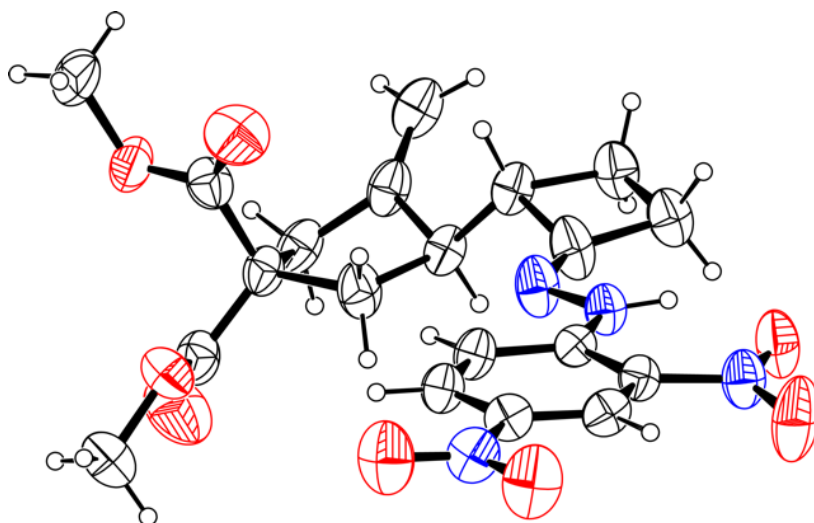

**Table S1.** Crystal data and structure refinement for compound 4.

|                                           |                                 |                          |
|-------------------------------------------|---------------------------------|--------------------------|
| CCDC deposit number                       | <b>1520299</b>                  |                          |
| Empirical formula                         | $C_{20}H_{22}N_4O_8$            |                          |
| Formula weight                            | 446.41                          |                          |
| Temperature / K                           | 293                             |                          |
| Wavelength / Å                            | 1.54187                         |                          |
| Crystal system                            | Triclinic                       |                          |
| Space group                               | P -1                            |                          |
| Unit cell dimensions                      | $a / \text{Å}, \alpha / ^\circ$ | 10.5093 (3) 105.992 (7)  |
|                                           | $b / \text{Å}, \beta / ^\circ$  | 13.2957 (4) 97.837 (7)   |
|                                           | $c / \text{Å}, \gamma / ^\circ$ | 17.9828 (12) 111.220 (8) |
| Volume / Å <sup>3</sup>                   | 2172.2 (2)                      |                          |
| Z                                         | 4                               |                          |
| Density (calculated) / Mg/m <sup>3</sup>  | 1.365                           |                          |
| Absorption coefficient / mm <sup>-1</sup> | 0.909                           |                          |
| F(000)                                    | 936                             |                          |
| Crystal size / mm <sup>3</sup>            | 0.58 x 0.20 x 0.16              |                          |
| $\theta$ range for data collection / °    | 6.699 to 68.205                 |                          |
|                                           | SI61                            |                          |

|                                               |                                                   |
|-----------------------------------------------|---------------------------------------------------|
| Index ranges                                  | -8 ≤ h ≤ 12, -16 ≤ k ≤ 15, -21 ≤ l ≤ 21           |
| Reflections collected                         | 24719                                             |
| Independent reflections                       | 7638 [R(int) = 0.0458]                            |
| Completeness to θ = 67.687°                   | 96.0 %                                            |
| Absorption correction                         | Semi-empirical from equivalents                   |
| Max. and min. transmission                    | 1.000 and 0.768                                   |
| Refinement method                             | Full-matrix least-squares on $F^2$                |
| Data / restraints / parameters                | 7638 / 26 / 642                                   |
| Goodness-of-fit on $F^2$                      | 1.065                                             |
| Final R indices [ $I > 2\sigma(I)$ ]          | R <sub>1</sub> = 0.0676, wR <sub>2</sub> = 0.1812 |
| R indices (all data)                          | R <sub>1</sub> = 0.0946, wR <sub>2</sub> = 0.2033 |
| Largest diff. peak / hole / e.Å <sup>-3</sup> | 0.252 / -0.238                                    |

$$R_1 = \sum ||F_o| - |F_c|| / \sum |F_o| ; wR_2 = [\sum w (F_o^2 - F_c^2)^2 / \sum w (F_o^2)^2]^{1/2}$$

## VI. DFT Computations.

All structures were optimized using the Gaussian 09 software package<sup>11</sup> at the B3LYP<sup>12</sup> level of density functional theory (DFT). The effective-core potential of Hay and Wadt with a double- $\xi$  valence basis set (LANL2DZ) was used to describe Au.<sup>13</sup> The other atoms were described by the 6-31G(d,p) basis set. Thermal corrections to the Gibbs free energy were obtained at the same level of theory. Single-point energy calculations were carried out at the M06<sup>14</sup> level with the quadruple- $\zeta$  valence def2-QZVP basis set on Au and the 6-311+G(2d,p) basis set on other elements. The values presented herein are Gibbs free energies (kcal/mol) obtained from the M06/def2-QZVP(Au)-6-311+G(2d,p)//B3LYP/LANL2DZ(Au)-6-31G(d,p) calculations ( $\Delta G_{298}$ , kcal/mol).

DFT computations were carried out to gain some insight into the factors governing the course and stereoselectivity of the title reaction. However, the ligands used in this study are too large to allow calculations at a high level of theory. To get extrapolation elements, we focused then on an achiral active catalyst, JohnPhosAu<sup>+</sup>, which has been used by Echavarren to generate type **2** tricyclic products (Scheme 1b), and by us to set up the reaction conditions favoring the formation of the cyclobutanones (Table 1, Entries 1 and 2). The model enyne used in the computations is displayed in Scheme S1, as well as the key steps studied computationally.

After coordination of the substrate to the cationic gold complex, we considered conformers **Int1** and **Int1'**, which differ by the relative orientation of the ethoxycyclopropyl group (see Figure S3 for the geometries). The latter is more stable by 0.5 kcal/mol and has been taken as the reference for energy calculations. Interconversion of these conformers requires an activation energy of 1.3 kcal/mol. The cyclization of **Int1** into the cyclopropylcarbene **Int2** requires 9.0 kcal/mol of free energy of activation (relatively to **Int1'**) and releases 3.5 kcal/mol. This step is, as expected for this kind of transformation, stereospecific, *i.e.* the two *trans* hydrogen atoms of the alkene moiety of **Int1** are found in a *trans* relationship in **Int2**. The conversion of **Int2** into **Int3**, which shows the framework of the isolated *trans* cyclobutanone products, is virtually thermoneutral and is achieved through **TS<sub>2-3</sub>**, which lies 12.1 kcal/mol above **Int1'**. The final step, not observed experimentally with our ligands but which takes place with JohnPhosAu<sup>+</sup>, leads to **Int4**. The corresponding transition state **TS<sub>3-4</sub>** lies 2.1 kcal/mol below **Int1**. This step is strongly exergonic ( $\Delta G_{298}(\mathbf{Int1}'-\mathbf{Int4}) = -41.4$  kcal/mol). The cyclization of **Int1'** into **Int2'** requires a slightly higher free energy of activation than that of **Int1** (10.3 kcal/mol vs 9.0 kcal/mol). This transformation is endergonic by 3.0 kcal/mol. Interestingly, the geometry of **Int2'** is markedly different from that of **Int2** in the

---

<sup>11</sup> Gaussian 09, Revision D.01, M. J. Frisch, G. W. Trucks, H. B. Schlegel, G. E. Scuseria, M. A. Robb, J. R. Cheeseman, G. Scalmani, V. Barone, B. Mennucci, G. A. Petersson, H. Nakatsuji, M. Caricato, X. Li, H. P. Hratchian, A. F. Izmaylov, J. Bloino, G. Zheng, J. L. Sonnenberg, M. Hada, M. Ehara, K. Toyota, R. Fukuda, J. Hasegawa, M. Ishida, T. Nakajima, Y. Honda, O. Kitao, H. Nakai, T. Vreven, J. A. Montgomery, Jr., J. E. Peralta, F. Ogliaro, M. Bearpark, J. J. Heyd, E. Brothers, K. N. Kudin, V. N. Staroverov, R. Kobayashi, J. Normand, K. Raghavachari, A. Rendell, J. C. Burant, S. S. Iyengar, J. Tomasi, M. Cossi, N. Rega, J. M. Millam, M. Klene, J. E. Knox, J. B. Cross, V. Bakken, C. Adamo, J. Jaramillo, R. Gomperts, R. E. Stratmann, O. Yazyev, A. J. Austin, R. Cammi, C. Pomelli, J. W. Ochterski, R. L. Martin, K. Morokuma, V. G. Zakrzewski, G. A. Voth, P. Salvador, J. J. Dannenberg, S. Dapprich, A. D. Daniels, Ö. Farkas, J. B. Foresman, J. V. Ortiz, J. Cioslowski, and D. J. Fox, Gaussian, Inc., Wallingford CT, 2009.

<sup>12</sup> (a) A. D. Becke, *J. Chem. Phys.* **1993**, *98*, 5648; (b) C. Lee, W. Yang, R. G. Parr, *Phys. Rev. B*, **1988**, *37*, 785; (c) S. H. Vosko, L. Wilk, M. Nusair, *Can. J. Phys.* **1980**, *58*, 1200; (d) P. J. Stephens, F. J. Devlin, C. F. Chabalowski, M. J. Frisch, *J. Phys. Chem.* **1994**, *98*, 11623.

<sup>13</sup> P. J. Hay, W. R. Wadt, *J. Chem. Phys.* **1985**, *82*, 299.

<sup>14</sup> Y. Zhao, D. G. Truhlar, The M06 Suite of Density Functionals for Main Group Thermochemistry, Thermochemical Kinetics, Noncovalent Interactions, Excited States, and Transition Elements. *Theor. Chem. Acc.* **2008**, *120*, 215.

sense that it displays elongated bonds in the two cyclopropane units. Thus, **Int2'** has more a carbocationic than a cyclopropylcarbene character.

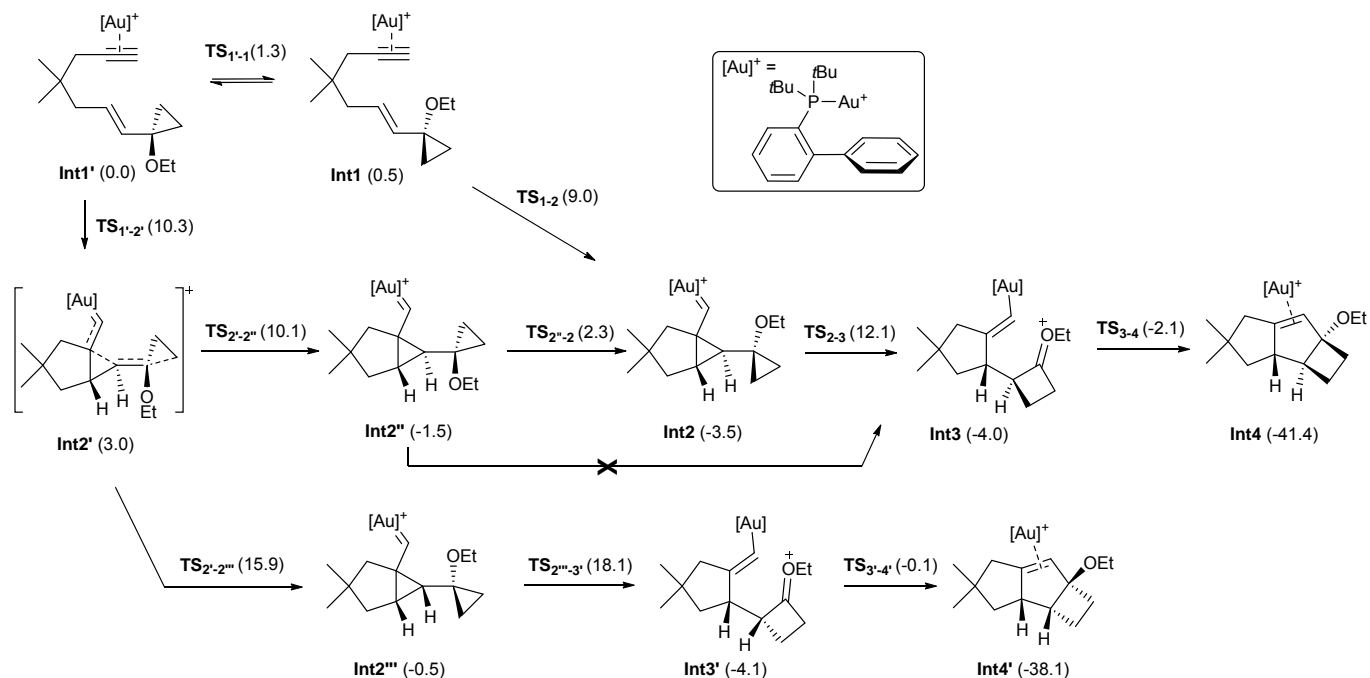

**Scheme S1.** Computed intermediates and transition states with their relative free energy at the M06/def2-QZVP(Au)-6-311+G(2d,p) (other elements) level of theory ( $\Delta G_{298}$ , kcal/mol).

Nevertheless, the cyclopropylcarbene isomer **Int2''** also exists and could be connected to **Int2'** by a transition state lying 10.1 kcal/mol above **Int1'**. These calculation results are consistent with those reported by Echavarren in a related study.<sup>15</sup> Complex **Int2''** could not be transformed into a cyclobutanone such as **Int3**. However, **TS<sub>2-2''</sub>**, which lies 2.3 kcal/mol above **Int1'**, was found to connect the two conformers **Int2''** and **Int2** by simple rotation of the C-C bond between the two cyclopropyl rings. Of particular interest, although an inversion of configuration is not possible from the cyclopropylcarbene intermediates, it becomes feasible from the carbocationic complex **Int2'**. A transition state corresponding to the rotation of the C-C bond holding to the two *trans* hydrogen, **TS<sub>2-2'''</sub>**, could be located. This step requires 12.9 kcal/mol of free energy of activation and leads to the cyclopropylcarbene **Int2'''**, which is more stable than **Int1'** by 0.5 kcal/mol. It displays a *cis* configuration of the two hydrogens and can be converted into the cyclobutanone precursor **Int3'**, and then the *cis* tricyclic product **Int4'**. The transition state corresponding to the formation of **Int3'** is significantly less stable than **TS<sub>2-3</sub>** by 6.0 kcal/mol. On the other hand, the final step in the *cis* series, achieved through **TS<sub>3'-4'</sub>**, is more energetically demanding than the corresponding one in the *trans* series (**TS<sub>3-4</sub>**) by 2.0 kcal/mol. Of note, the formation of this third stereocenter leads necessarily to a *cis* 5/4 ring fusion. Attaining a geometry of a transition state giving rise to a *trans* ring fusion is geometrically unworkable.

Although calculations reveal that the final step **Int3/Int4** is highly favored with the Echavarren's catalyst, it might be slowed down by, for instance, bulky ligands such as those used in this study. In this case, the cyclobutanone intermediates **Int3,3'** might evolve then into the observed cyclobutanone derivatives *trans*-**3a** and *cis*-**3a** respectively, by reaction with water and subsequent protodemetalation. If **Int3,3'** are formed reversibly, then the proportion of the *trans* and *cis* cyclobutanone products might be in fact dictated by the ease by which the solvent- or the water-assisted deethylation (adventitious or intentionally added

<sup>15</sup> C. Nieto-Oberhuber, S. López, M-P. Muñoz, D.J. Cárdenas, E. Buñuel, C. Nevado and A. M. Echavarren, *Angew. Chem. Int. Ed.* 2005, **44**, 6146.



water), and the following protodemetalation by  $\text{EtOH}_2^+$ , are achieved from these intermediates. Unfortunately, the water-promoted deethylation process could not be computed. Nevertheless, we checked whether water could affect the diastereoselectivity (according to the Echavarren's disclosure) by changing the ratios of diastereomeric intermediates (Scheme S2).

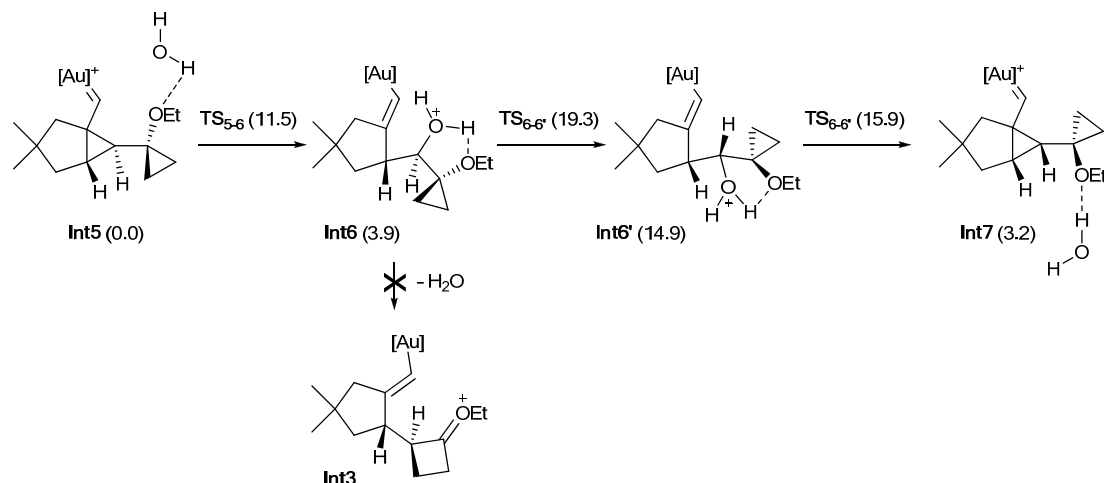

**Scheme S2.** Computed  $\text{H}_2\text{O}$ -assisted stereomutation ( $\Delta G_{298}$ , kcal/mol).

The addition of water to **Int2** was studied, starting from the H-bonded complex **Int5**. The latter undergoes a ring opening of the cyclopropylcarbene framework to give the water adduct **Int6**. This step requires 11.5 kcal/mol of free energy of activation and is endergonic by 3.9 kcal/mol. Of note, it was not possible to compute a pinacol-type expansion of the cyclopropyl unit of **Int6** to give rise to **Int3** with elimination of water. On the other hand, the stereodetermining C-C bond is now free to rotate to give **Int6'**. From this complex, cyclization reaction provides the *cis* cyclopropylcarbene **Int7**. The rotation step is achieved at a quite high free energy cost of 15.4 kcal/mol (19.3 kcal/mol relatively to **Int5**) and is strongly endergonic by 11 kcal/mol. On the other hand, ring closing requires only 1 kcal/mol to reach **TS<sub>6-6'</sub>** (15.9 kcal/mol relatively to **Int5**). The *cis* complex **Int7** is slightly less stable than **Int5** by 3.2 kcal/mol, which is in line with the calculation results summarized in Scheme S2. Thus, a scenario involving water as stereomutating agent seems also plausible. As in the case shown in Scheme S2, such a process would cross a quite high barrier (but surmountable at room temperature), yet they are in the same range (18.1 vs 19.3 kcal/mol), so both mechanisms can actually coexist.

**Figure S3.** Geometries of the computed species (selected distances in Å)

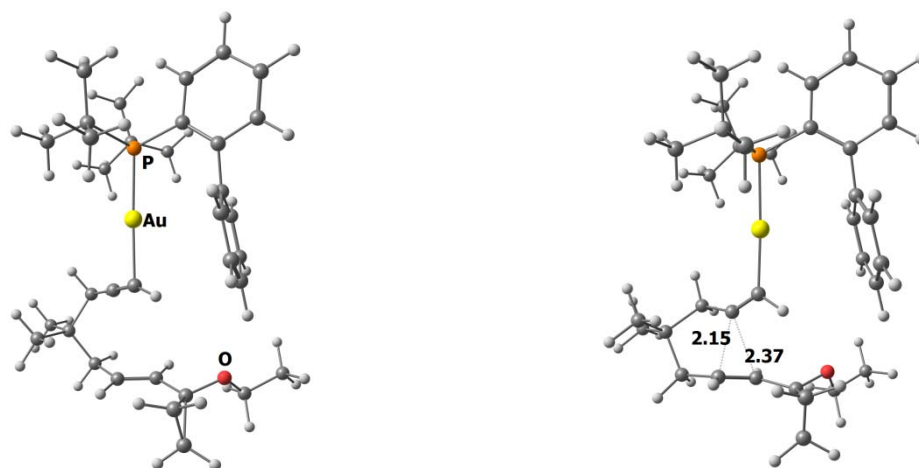

Int1

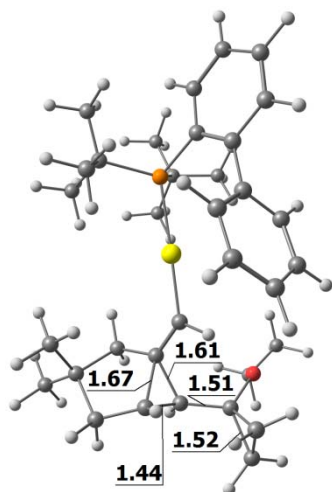

Int2

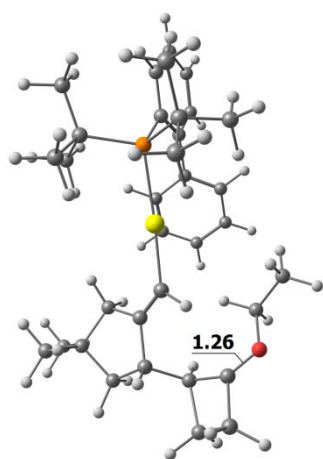

Int3

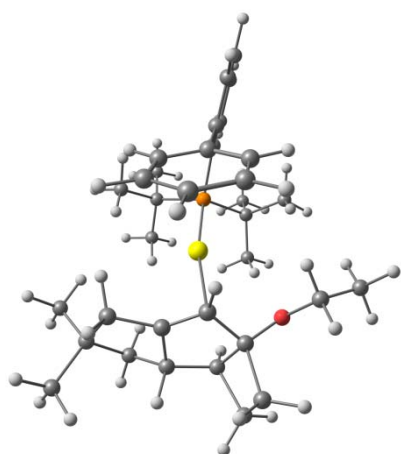

Int4

TS<sub>1-2</sub>

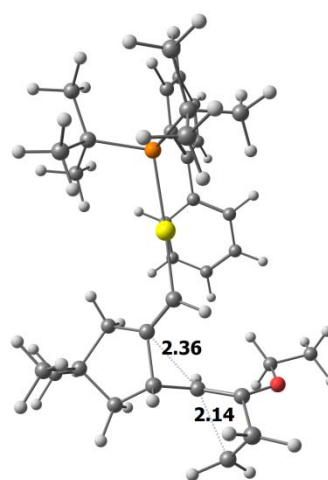

TS<sub>2-3</sub>

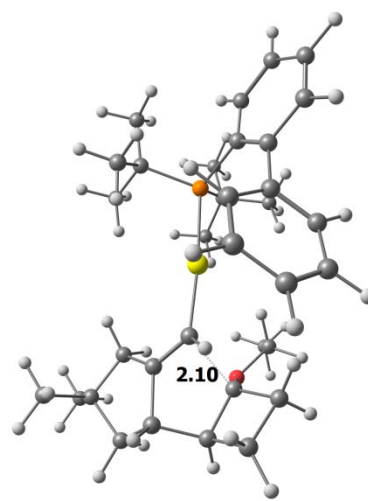

TS<sub>3-4</sub>

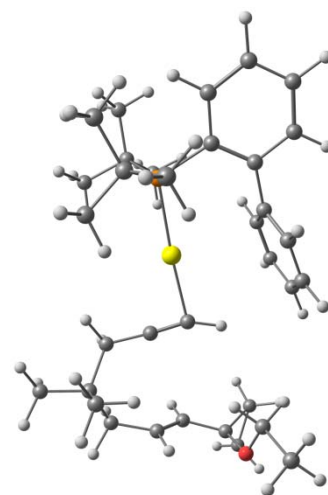

Int1'

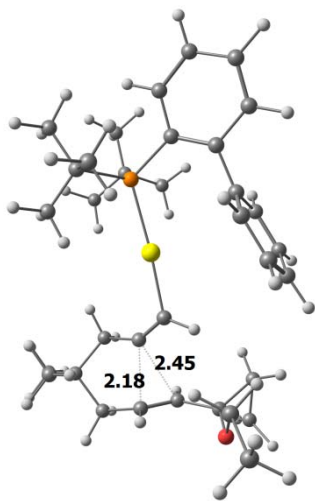

TS<sub>1'-2'</sub>

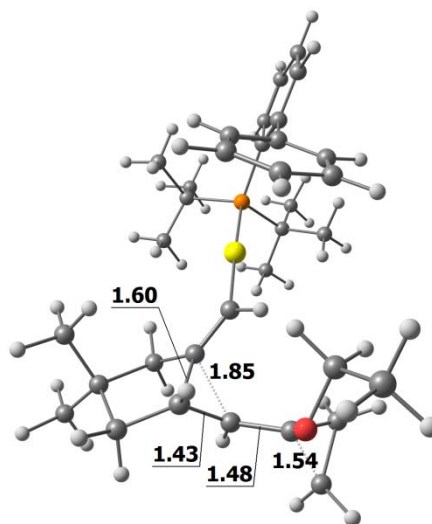

Int2'

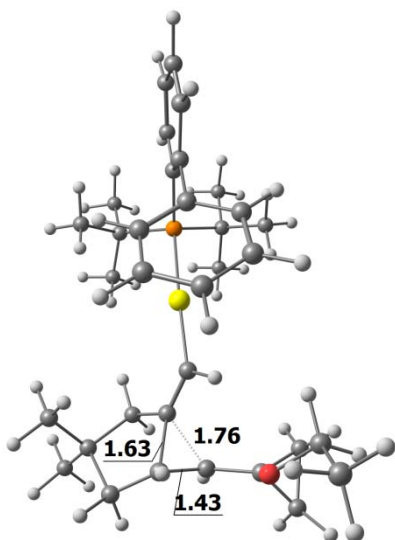

TS<sub>2'-2''</sub>

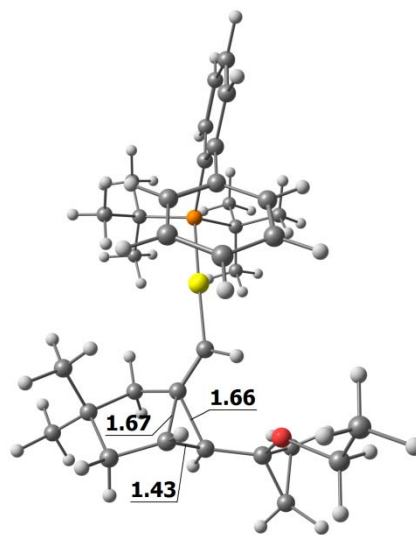

Int2''

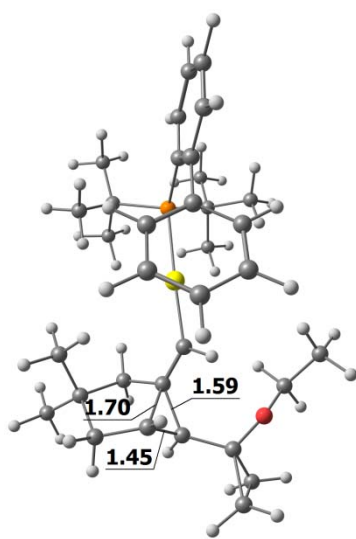

TS<sub>2-2''</sub>

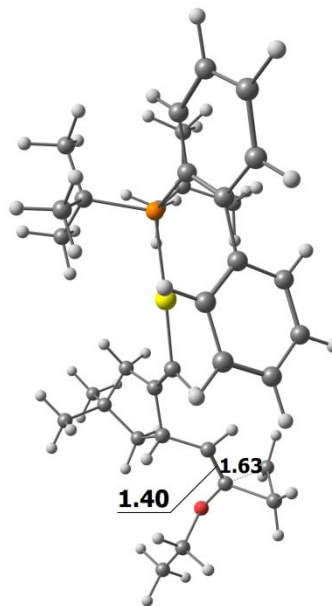

TS<sub>2'-2'''</sub>

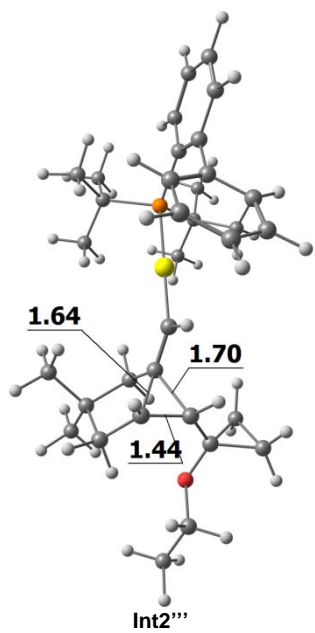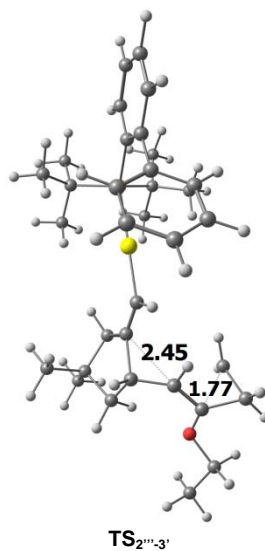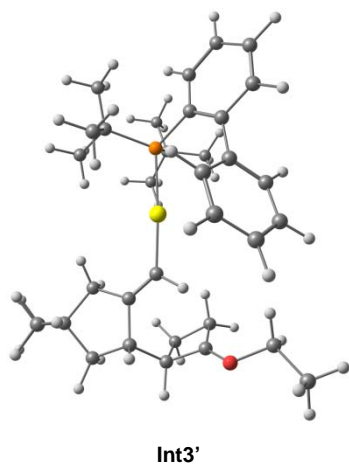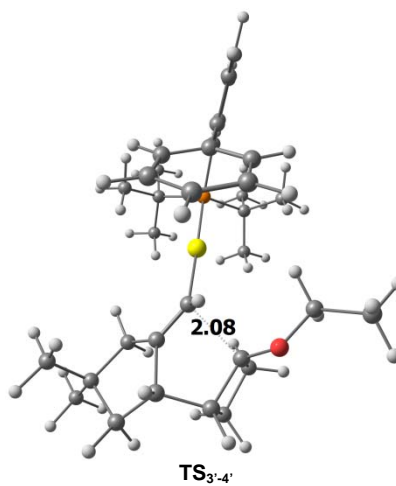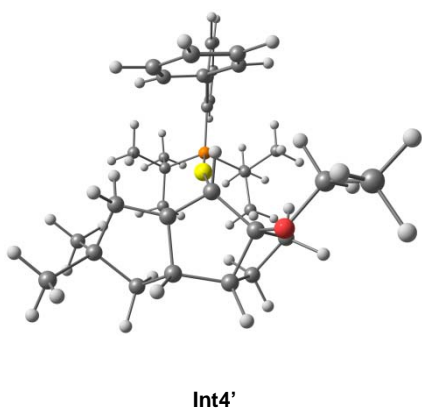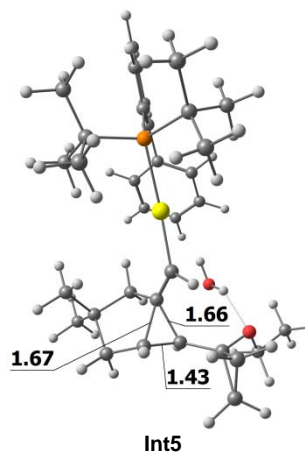

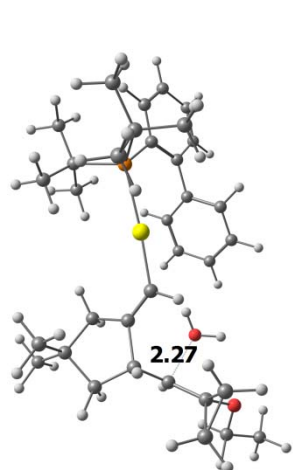

**TS<sub>5-6</sub>**

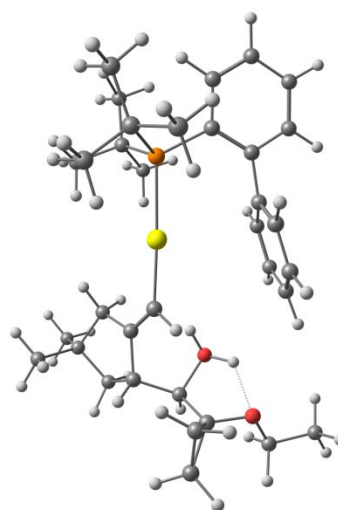

**Int6**

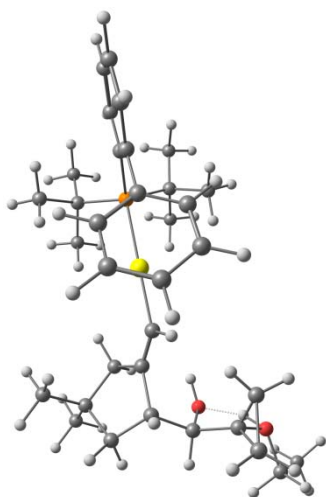

**TS<sub>6-6'</sub>**

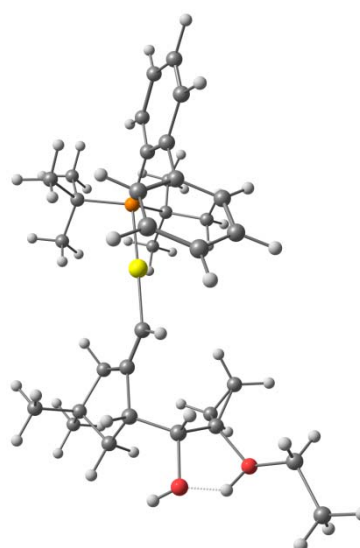

**Int6'**

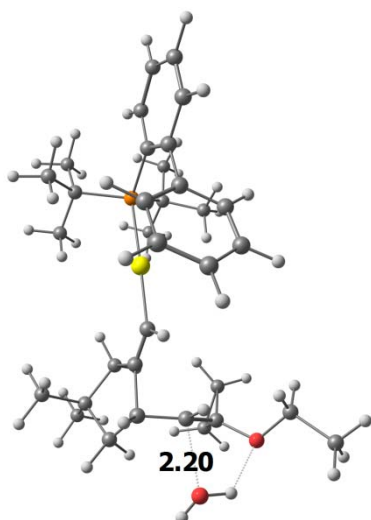

**TS<sub>6'-7</sub>**

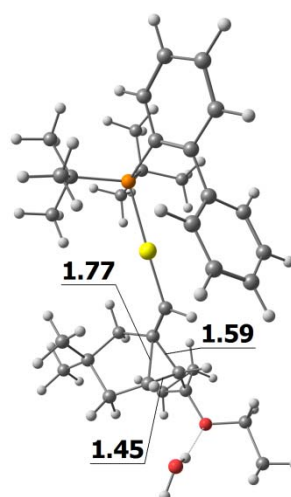

**Int7**

**Table S1.** Coordinates (x,y,z) and energy (Hartree) of the computed species

| Int1<br>E(RM06) = -1876.51247703 |              |              |              | TS <sub>1,2</sub><br>E(RM06) = -1876.50091039<br>Frequency -223.1887 |              |              |              |
|----------------------------------|--------------|--------------|--------------|----------------------------------------------------------------------|--------------|--------------|--------------|
| C                                | -4.990104000 | -1.313200000 | -0.245196000 | C                                                                    | 4.598510000  | -1.205434000 | 0.698945000  |
| C                                | -1.929443000 | -1.454510000 | -0.002245000 | C                                                                    | 2.601691000  | -1.077299000 | -0.088267000 |
| C                                | -5.027884000 | -0.088042000 | 0.294529000  | C                                                                    | 4.733837000  | -0.040624000 | -0.013077000 |
| C                                | -5.231998000 | 1.205474000  | -0.421801000 | C                                                                    | 4.694350000  | 1.335324000  | 0.514282000  |
| C                                | -6.435766000 | 1.400109000  | -1.333691000 | C                                                                    | 5.747479000  | 1.720494000  | 1.569145000  |
| C                                | -5.049260000 | 1.315666000  | -1.915983000 | C                                                                    | 4.305208000  | 1.635419000  | 1.950895000  |
| H                                | -7.107706000 | 0.556810000  | -1.457970000 | H                                                                    | 6.431091000  | 0.950326000  | 1.910752000  |
| H                                | -6.915841000 | 2.373612000  | -1.327576000 | H                                                                    | 6.184462000  | 2.706764000  | 1.452774000  |
| H                                | -4.901845000 | 0.012985000  | 1.372382000  | H                                                                    | 4.968080000  | -0.119462000 | -1.073651000 |
| C                                | -4.814065000 | -2.586280000 | 0.537486000  | C                                                                    | 4.942654000  | -2.556156000 | 0.122251000  |
| H                                | -5.126957000 | -1.428145000 | -1.319866000 | H                                                                    | 4.413262000  | -1.151141000 | 1.768559000  |
| C                                | -1.630877000 | -0.405574000 | -0.581156000 | C                                                                    | 1.775929000  | -0.210395000 | 0.400570000  |
| C                                | -2.245182000 | -2.701152000 | 0.688285000  | C                                                                    | 2.750052000  | -2.297765000 | -0.919675000 |
| Au                               | 0.527304000  | -0.563343000 | -0.139366000 | Au                                                                   | -0.291344000 | -0.389306000 | 0.127528000  |
| H                                | -1.856185000 | 0.521142000  | -1.076869000 | H                                                                    | 2.080239000  | 0.661544000  | 0.968199000  |
| C                                | -3.549134000 | -3.435205000 | 0.214808000  | C                                                                    | 3.653643000  | -3.350315000 | -0.238331000 |
| H                                | -1.401941000 | -3.387748000 | 0.545411000  | H                                                                    | 1.738975000  | -2.686201000 | -1.086186000 |
| H                                | -2.314168000 | -2.499480000 | 1.764604000  | H                                                                    | 3.158487000  | -2.033998000 | -1.904646000 |
| O                                | -4.777802000 | 2.333528000  | 0.292383000  | O                                                                    | 4.319143000  | 2.320066000  | -0.404976000 |
| H                                | -4.607020000 | 2.240774000  | -2.271430000 | H                                                                    | 3.764693000  | 2.565807000  | 2.084399000  |
| H                                | -4.763428000 | 0.428026000  | -2.472554000 | H                                                                    | 3.978281000  | 0.824811000  | 2.593715000  |
| C                                | -5.658180000 | 2.789428000  | 1.326727000  | C                                                                    | 5.318503000  | 2.698877000  | -1.366022000 |
| P                                | 2.881296000  | -0.537214000 | 0.078833000  | P                                                                    | -2.661033000 | -0.688178000 | -0.066385000 |
| C                                | 3.582449000  | -1.414704000 | -1.475605000 | C                                                                    | -3.214023000 | -1.616674000 | 1.520727000  |
| C                                | 3.593597000  | 1.169132000  | 0.089030000  | C                                                                    | -3.674778000 | 0.863283000  | -0.121967000 |
| C                                | 3.314368000  | -1.365675000 | 1.758993000  | C                                                                    | -2.998258000 | -1.642246000 | -1.704375000 |
| C                                | 5.116639000  | -1.370803000 | -1.621726000 | C                                                                    | -4.732819000 | -1.815303000 | 1.687936000  |
| C                                | 3.113647000  | -2.884009000 | -1.473567000 | C                                                                    | -2.510980000 | -2.988925000 | 1.557895000  |
| C                                | 2.960532000  | -0.683028000 | -2.686484000 | C                                                                    | -2.709400000 | -0.755403000 | 2.700659000  |
| C                                | 2.831756000  | 2.354692000  | -0.073940000 | C                                                                    | -3.132100000 | 2.165780000  | 0.019841000  |
| C                                | 4.991669000  | 1.284579000  | 0.237945000  | C                                                                    | -5.071407000 | 0.737097000  | -0.275333000 |
| C                                | 4.779575000  | -1.821433000 | 1.899809000  | C                                                                    | -4.347458000 | -2.382414000 | -1.778883000 |
| C                                | 2.397093000  | -2.592326000 | 1.958835000  | C                                                                    | -1.869268000 | -2.676781000 | -1.912970000 |

|   |              |              |              |   |              |              |              |
|---|--------------|--------------|--------------|---|--------------|--------------|--------------|
| C | 2.986131000  | -0.324826000 | 2.850064000  | C | -2.913954000 | -0.599074000 | -2.839316000 |
| H | 5.487220000  | -0.355263000 | -1.772008000 | H | -5.261155000 | -0.865256000 | 1.786997000  |
| H | 5.387989000  | -1.948217000 | -2.512540000 | H | -4.903874000 | -2.379884000 | 2.611580000  |
| H | 5.643903000  | -1.817424000 | -0.776208000 | H | -5.185051000 | -2.384797000 | 0.873409000  |
| H | 3.352367000  | -3.329540000 | -2.445529000 | H | -2.663650000 | -3.438138000 | 2.545742000  |
| H | 3.622982000  | -3.480104000 | -0.711550000 | H | -2.921281000 | -3.684280000 | 0.820482000  |
| H | 2.032720000  | -2.973894000 | -1.324969000 | H | -1.432095000 | -2.902451000 | 1.394574000  |
| H | 3.355710000  | -1.127999000 | -3.606378000 | H | -2.993137000 | -1.242105000 | 3.640713000  |
| H | 3.214803000  | 0.380936000  | -2.697550000 | H | -3.156779000 | 0.243115000  | 2.697075000  |
| H | 1.870848000  | -0.779303000 | -2.710376000 | H | -1.620946000 | -0.645367000 | 2.692403000  |
| C | 3.510056000  | 3.586948000  | -0.108805000 | C | -4.010059000 | 3.264915000  | 0.038341000  |
| C | 1.338856000  | 2.459743000  | -0.183619000 | C | -1.677794000 | 2.514204000  | 0.119435000  |
| C | 5.638296000  | 2.516518000  | 0.216337000  | C | -5.920143000 | 1.840125000  | -0.272979000 |
| H | 5.595149000  | 0.396088000  | 0.363719000  | H | -5.514541000 | -0.242479000 | -0.391306000 |
| C | 4.891222000  | 3.677937000  | 0.032500000  | C | -5.385821000 | 3.115663000  | -0.103929000 |
| H | 2.923431000  | 4.491199000  | -0.236841000 | H | -3.585888000 | 4.257756000  | 0.151587000  |
| C | 0.733188000  | 2.723948000  | -1.422885000 | C | -1.119843000 | 2.900811000  | 1.347313000  |
| C | 0.542988000  | 2.498248000  | 0.976482000  | C | -0.892992000 | 2.618574000  | -1.041466000 |
| H | 5.376578000  | 4.648579000  | 0.005512000  | H | -6.031524000 | 3.988334000  | -0.090889000 |
| H | 6.715982000  | 2.562874000  | 0.336818000  | H | -6.989295000 | 1.698531000  | -0.396452000 |
| C | -0.633462000 | 3.008889000  | -1.501662000 | C | 0.196757000  | 3.363552000  | 1.415948000  |
| H | 1.340752000  | 2.730204000  | -2.323270000 | H | -1.725366000 | 2.853192000  | 2.247811000  |
| C | -0.821364000 | 2.781459000  | 0.893910000  | C | 0.421942000  | 3.080941000  | -0.970921000 |
| H | 1.006176000  | 2.337017000  | 1.945589000  | H | -1.325895000 | 2.360343000  | -2.003485000 |
| C | -1.416775000 | 3.040117000  | -0.344412000 | C | 0.971551000  | 3.454416000  | 0.257713000  |
| H | -1.079462000 | 3.225524000  | -2.468355000 | H | 0.607342000  | 3.669047000  | 2.374362000  |
| H | -2.480075000 | 3.254755000  | -0.393967000 | H | 1.995603000  | 3.810973000  | 0.302546000  |
| H | -1.420201000 | 2.814583000  | 1.798954000  | H | 1.014143000  | 3.161107000  | -1.877455000 |
| H | 5.491320000  | -0.997298000 | 1.825170000  | H | -5.207329000 | -1.716245000 | -1.690741000 |
| H | 5.048975000  | -2.589058000 | 1.170528000  | H | -4.431951000 | -3.168023000 | -1.024106000 |
| H | 4.908114000  | -2.262410000 | 2.894625000  | H | -4.422442000 | -2.867591000 | -2.758828000 |
| H | 2.544396000  | -3.360779000 | 1.197502000  | H | -1.840039000 | -3.433697000 | -1.126352000 |
| H | 2.625445000  | -3.042525000 | 2.931355000  | H | -2.040130000 | -3.194150000 | -2.863958000 |
| H | 1.339857000  | -2.310984000 | 1.963214000  | H | -0.887853000 | -2.196459000 | -1.963558000 |
| H | 3.645221000  | 0.545202000  | 2.803826000  | H | -3.730494000 | 0.125445000  | -2.798745000 |

|                                         |              |              |              |                                                                            |              |              |              |
|-----------------------------------------|--------------|--------------|--------------|----------------------------------------------------------------------------|--------------|--------------|--------------|
| H                                       | 1.949307000  | 0.020562000  | 2.779908000  | H                                                                          | -1.965355000 | -0.052166000 | -2.814652000 |
| H                                       | 3.113388000  | -0.792809000 | 3.832392000  | H                                                                          | -2.971424000 | -1.118104000 | -3.802684000 |
| C                                       | -5.040811000 | 4.019065000  | 1.969403000  | C                                                                          | 4.751995000  | 3.824559000  | -2.211893000 |
| H                                       | -5.810466000 | 1.998365000  | 2.075813000  | H                                                                          | 5.583672000  | 1.839952000  | -1.999815000 |
| H                                       | -6.642436000 | 3.025518000  | 0.899765000  | H                                                                          | 6.231722000  | 3.017483000  | -0.845708000 |
| H                                       | -4.894638000 | 4.810427000  | 1.228549000  | H                                                                          | 4.501931000  | 4.688300000  | -1.589604000 |
| H                                       | -4.070807000 | 3.781190000  | 2.416892000  | H                                                                          | 3.848168000  | 3.499718000  | -2.735188000 |
| H                                       | -5.695851000 | 4.402040000  | 2.757542000  | H                                                                          | 5.487255000  | 4.139006000  | -2.958241000 |
| H                                       | -4.821628000 | -2.362417000 | 1.611890000  | H                                                                          | 5.543401000  | -2.422549000 | -0.784418000 |
| H                                       | -5.680572000 | -3.237512000 | 0.354630000  | H                                                                          | 5.552784000  | -3.122170000 | 0.834516000  |
| C                                       | -3.456123000 | -3.774027000 | -1.282637000 | C                                                                          | 2.980344000  | -3.910283000 | 1.027581000  |
| H                                       | -2.604246000 | -4.433709000 | -1.481197000 | H                                                                          | 2.062273000  | -4.449415000 | 0.771222000  |
| H                                       | -4.360230000 | -4.296728000 | -1.610995000 | H                                                                          | 3.645787000  | -4.614239000 | 1.537409000  |
| H                                       | -3.339710000 | -2.881950000 | -1.904354000 | H                                                                          | 2.711739000  | -3.121728000 | 1.737304000  |
| C                                       | -3.625129000 | -4.740554000 | 1.031296000  | C                                                                          | 3.983199000  | -4.494838000 | -1.206756000 |
| H                                       | -4.513207000 | -5.313660000 | 0.748502000  | H                                                                          | 4.681537000  | -5.202328000 | -0.748292000 |
| H                                       | -2.750180000 | -5.374688000 | 0.852846000  | H                                                                          | 3.081091000  | -5.052532000 | -1.478739000 |
| H                                       | -3.686916000 | -4.540290000 | 2.106649000  | H                                                                          | 4.440730000  | -4.121869000 | -2.129492000 |
| <b>Int2</b><br>E(RM06) = -1876.52486710 |              |              |              | <b>TS<sub>2-3</sub></b><br>E(RM06) = -1876.52649642<br>Frequency -253.7244 |              |              |              |
| C                                       | -4.237611000 | -0.528202000 | -1.194850000 | C                                                                          | -6.407044000 | 0.302035000  | -1.319714000 |
| C                                       | -2.996972000 | -0.649487000 | -0.090589000 | C                                                                          | -4.581608000 | 0.253311000  | -0.197991000 |
| C                                       | -4.427140000 | 0.072187000  | 0.104755000  | C                                                                          | -4.189401000 | -1.170945000 | -0.112052000 |
| C                                       | -4.473020000 | 1.558625000  | 0.354449000  | C                                                                          | -2.659037000 | -1.050501000 | 0.189194000  |
| C                                       | -5.801242000 | 2.260973000  | 0.146415000  | C                                                                          | -1.773052000 | -0.482897000 | -0.648584000 |
| C                                       | -4.630277000 | 2.553899000  | -0.762793000 | C                                                                          | -2.420697000 | -1.710505000 | 1.533773000  |
| H                                       | -6.635704000 | 1.693659000  | -0.255163000 | C                                                                          | -4.768806000 | -1.940119000 | 1.101276000  |
| H                                       | -6.071578000 | 3.013246000  | 0.880037000  | H                                                                          | -4.355902000 | -1.702258000 | -1.052775000 |
| H                                       | -4.991421000 | -0.524471000 | 0.820903000  | C                                                                          | -4.791959000 | 1.005551000  | -1.373173000 |
| C                                       | -4.671241000 | -1.962214000 | -1.453890000 | H                                                                          | -4.516219000 | 0.809045000  | 0.733424000  |
| H                                       | -4.014167000 | 0.119871000  | -2.035354000 | C                                                                          | -5.494046000 | 0.342972000  | -2.507914000 |
| C                                       | -1.894975000 | 0.164434000  | -0.295910000 | O                                                                          | -4.726714000 | 2.337758000  | -1.464187000 |
| C                                       | -2.973487000 | -2.117291000 | 0.310940000  | H                                                                          | -5.745785000 | 1.032549000  | -3.308084000 |
| Au                                      | 0.074402000  | -0.217776000 | 0.000040000  | H                                                                          | -5.114526000 | -0.614475000 | -2.850621000 |
| H                                       | -2.134178000 | 1.157736000  | -0.678054000 | H                                                                          | -6.671559000 | -0.650012000 | -0.875815000 |



|   |              |              |              |    |              |              |              |
|---|--------------|--------------|--------------|----|--------------|--------------|--------------|
| C | -3.565691000 | -2.915710000 | -0.885410000 | H  | -7.084442000 | 1.131356000  | -1.146603000 |
| H | -1.951813000 | -2.426893000 | 0.543923000  | Au | 0.266583000  | -0.400829000 | -0.477569000 |
| H | -3.577765000 | -2.279068000 | 1.212174000  | P  | 2.688047000  | -0.537726000 | -0.505390000 |
| O | -3.663366000 | 2.012169000  | 1.400974000  | H  | -2.195403000 | -0.056860000 | -1.564934000 |
| H | -4.113495000 | 3.496938000  | -0.620592000 | C  | -3.576241000 | -2.726264000 | 1.709879000  |
| H | -4.681902000 | 2.212621000  | -1.791715000 | H  | -1.429672000 | -2.171841000 | 1.573120000  |
| C | -4.060331000 | 1.596991000  | 2.716756000  | H  | -2.456884000 | -0.965146000 | 2.342040000  |
| P | 2.411316000  | -0.740190000 | 0.384015000  | C  | 3.222226000  | -0.368208000 | -2.351489000 |
| C | 2.841987000  | -2.281270000 | -0.674798000 | C  | 3.662333000  | 0.740241000  | 0.426673000  |
| C | 3.621611000  | 0.577516000  | -0.099091000 | C  | 3.153972000  | -2.225005000 | 0.286442000  |
| C | 2.613257000  | -1.012970000 | 2.281490000  | C  | 4.613530000  | -0.919150000 | -2.717636000 |
| C | 4.327513000  | -2.689797000 | -0.674549000 | C  | 2.176206000  | -1.088874000 | -3.232877000 |
| C | 1.983073000  | -3.469926000 | -0.197303000 | C  | 3.164773000  | 1.141288000  | -2.673883000 |
| C | 2.441818000  | -1.923226000 | -2.123441000 | H  | 5.425666000  | -0.430155000 | -2.177324000 |
| C | 3.249220000  | 1.793959000  | -0.724772000 | H  | 4.787850000  | -0.734758000 | -3.784254000 |
| C | 4.983874000  | 0.375964000  | 0.206524000  | H  | 4.688194000  | -1.998689000 | -2.564169000 |
| C | 3.858977000  | -1.808577000 | 2.715840000  | C  | 3.068982000  | 1.776607000  | 1.189834000  |
| C | 1.361207000  | -1.752989000 | 2.805628000  | C  | 5.069607000  | 0.710122000  | 0.333554000  |
| C | 2.647402000  | 0.392469000  | 2.920400000  | C  | 3.903474000  | 2.728480000  | 1.805124000  |
| H | 4.962572000  | -1.922558000 | -1.121711000 | C  | 1.603867000  | 1.983946000  | 1.436957000  |
| H | 4.435219000  | -3.595227000 | -1.282690000 | C  | 5.289150000  | 2.680616000  | 1.694297000  |
| H | 4.708076000  | -2.922432000 | 0.321997000  | H  | 3.438775000  | 3.517813000  | 2.387952000  |
| H | 2.088629000  | -4.292803000 | -0.913390000 | C  | 5.877903000  | 1.658438000  | 0.953344000  |
| H | 2.301912000  | -3.847834000 | 0.777597000  | H  | 5.900359000  | 3.432304000  | 2.184398000  |
| H | 0.920607000  | -3.212057000 | -0.140657000 | H  | 6.957161000  | 1.596028000  | 0.853787000  |
| H | 2.672555000  | -2.773668000 | -2.775170000 | H  | 5.552401000  | -0.071422000 | -0.235984000 |
| H | 3.000660000  | -1.060396000 | -2.498627000 | C  | 0.914935000  | 2.996759000  | 0.752336000  |
| H | 1.372190000  | -1.711087000 | -2.214263000 | C  | 0.951231000  | 1.316777000  | 2.485312000  |
| C | 4.248661000  | 2.743542000  | -1.005089000 | C  | -0.391614000 | 3.336022000  | 1.108701000  |
| C | 1.865083000  | 2.195657000  | -1.139752000 | H  | 1.417208000  | 3.538402000  | -0.043883000 |
| C | 5.957261000  | 1.327794000  | -0.081781000 | C  | -1.026947000 | 2.672151000  | 2.159988000  |
| H | 5.298699000  | -0.543917000 | 0.679500000  | H  | -0.897298000 | 4.141185000  | 0.582503000  |
| C | 5.586279000  | 2.524115000  | -0.691940000 | C  | -0.354181000 | 1.656803000  | 2.843130000  |
| H | 3.954516000  | 3.671816000  | -1.484948000 | H  | -2.028781000 | 2.961943000  | 2.466140000  |
| C | 1.363662000  | 1.837690000  | -2.401283000 | H  | -0.832446000 | 1.147682000  | 3.675051000  |

|   |              |              |              |   |              |              |              |
|---|--------------|--------------|--------------|---|--------------|--------------|--------------|
| C | 1.120644000  | 3.082620000  | -0.345359000 | H | 1.481594000  | 0.552024000  | 3.044175000  |
| H | 6.329850000  | 3.280272000  | -0.924155000 | C | 4.659168000  | -2.514950000 | 0.440458000  |
| H | 6.994714000  | 1.132502000  | 0.170966000  | C | 2.502236000  | -3.351468000 | -0.541616000 |
| C | 0.146186000  | 2.350813000  | -2.855111000 | C | 2.523851000  | -2.204473000 | 1.696597000  |
| H | 1.943934000  | 1.180306000  | -3.041430000 | H | 5.144506000  | -1.813664000 | 1.122117000  |
| C | -0.097832000 | 3.593735000  | -0.797983000 | H | 5.197148000  | -2.508856000 | -0.509857000 |
| H | 1.511889000  | 3.390736000  | 0.619913000  | H | 4.775019000  | -3.516619000 | 0.870772000  |
| C | -0.585402000 | 3.233217000  | -2.056331000 | H | 2.989444000  | -3.482187000 | -1.511549000 |
| H | -0.214638000 | 2.081843000  | -3.843763000 | H | 2.604585000  | -4.297303000 | 0.002820000  |
| H | -1.516967000 | 3.655594000  | -2.422151000 | H | 1.435355000  | -3.174766000 | -0.710281000 |
| H | -0.653369000 | 4.288494000  | -0.175217000 | H | 2.959114000  | -1.418946000 | 2.322069000  |
| H | 4.796279000  | -1.324633000 | 2.435998000  | H | 1.440712000  | -2.055727000 | 1.656974000  |
| H | 3.859328000  | -2.828752000 | 2.324031000  | H | 2.718516000  | -3.164348000 | 2.189100000  |
| H | 3.856618000  | -1.884274000 | 3.809205000  | H | 2.456555000  | -0.956123000 | -4.284389000 |
| H | 1.249508000  | -2.751956000 | 2.378731000  | H | 2.127000000  | -2.162301000 | -3.039082000 |
| H | 1.453522000  | -1.867961000 | 3.891679000  | H | 1.173656000  | -0.675048000 | -3.096192000 |
| H | 0.443719000  | -1.192217000 | 2.606016000  | H | 3.314064000  | 1.279453000  | -3.750806000 |
| H | 3.547799000  | 0.948781000  | 2.650213000  | H | 3.940970000  | 1.705512000  | -2.151731000 |
| H | 1.774397000  | 0.990018000  | 2.636110000  | H | 2.191478000  | 1.572779000  | -2.415538000 |
| H | 2.632601000  | 0.284287000  | 4.010711000  | C | -4.372831000 | 3.138554000  | -0.301621000 |
| C | -3.207074000 | 2.346484000  | 3.724066000  | C | -4.253052000 | 4.574308000  | -0.771625000 |
| H | -3.920949000 | 0.511539000  | 2.827957000  | H | -3.428113000 | 2.766309000  | 0.108933000  |
| H | -5.127075000 | 1.815768000  | 2.863918000  | H | -5.162191000 | 3.030697000  | 0.453223000  |
| H | -3.349751000 | 3.425797000  | 3.623326000  | H | -5.196580000 | 4.928311000  | -1.194570000 |
| H | -2.146575000 | 2.122799000  | 3.575468000  | H | -3.471331000 | 4.669970000  | -1.529338000 |
| H | -3.482265000 | 2.054038000  | 4.741710000  | H | -3.995149000 | 5.214725000  | 0.076724000  |
| H | -5.624413000 | -2.149679000 | -0.946838000 | H | -5.149499000 | -1.229846000 | 1.846428000  |
| H | -4.829967000 | -2.131545000 | -2.522148000 | H | -5.604519000 | -2.589787000 | 0.820044000  |
| C | -2.481391000 | -3.146268000 | -1.954726000 | C | -3.299501000 | -4.001440000 | 0.890209000  |
| H | -1.678347000 | -3.777380000 | -1.559965000 | H | -2.434567000 | -4.537431000 | 1.294359000  |
| H | -2.901932000 | -3.650898000 | -2.830669000 | H | -4.156896000 | -4.682557000 | 0.921216000  |
| H | -2.029554000 | -2.207152000 | -2.292157000 | H | -3.082336000 | -3.776876000 | -0.159666000 |
| C | -4.159610000 | -4.260428000 | -0.446584000 | C | -3.829830000 | -3.092196000 | 3.177195000  |
| H | -4.612355000 | -4.786480000 | -1.293529000 | H | -4.693930000 | -3.758135000 | 3.277164000  |
| H | -3.384074000 | -4.912501000 | -0.031169000 | H | -2.965488000 | -3.610237000 | 3.605731000  |

|                                         |              |              |              |                                                                            |              |              |              |
|-----------------------------------------|--------------|--------------|--------------|----------------------------------------------------------------------------|--------------|--------------|--------------|
| H                                       | -4.932047000 | -4.126993000 | 0.318703000  | H                                                                          | -4.020414000 | -2.200298000 | 3.784864000  |
| <b>Int3</b><br>E(RM06) = -1876.52649642 |              |              |              | <b>TS<sub>3-4</sub></b><br>E(RM06) = -1876.52724590<br>Frequency -122.5674 |              |              |              |
| C                                       | 6.420734000  | 0.704248000  | 0.951694000  | C                                                                          | -1.980191000 | 0.670970000  | -0.450454000 |
| C                                       | 4.983892000  | 0.721029000  | 0.290592000  | C                                                                          | -3.158294000 | 1.319686000  | 1.158915000  |
| C                                       | 4.386799000  | -0.706680000 | 0.110311000  | Au                                                                         | -0.065726000 | -0.058567000 | -0.155028000 |
| C                                       | 2.879693000  | -0.704901000 | -0.201590000 | C                                                                          | -3.105839000 | -0.081080000 | -0.728794000 |
| C                                       | 1.933761000  | -0.268306000 | 0.644312000  | H                                                                          | -2.017942000 | 1.693050000  | -0.826704000 |
| C                                       | 2.696832000  | -1.373829000 | -1.551081000 | O                                                                          | -3.089267000 | 0.490472000  | 2.184267000  |
| C                                       | 5.052089000  | -1.435618000 | -1.083456000 | C                                                                          | -4.466362000 | 1.545414000  | 0.368369000  |
| H                                       | 4.570726000  | -1.258483000 | 1.041125000  | C                                                                          | -2.840371000 | 2.817062000  | 1.186501000  |
| C                                       | 4.606159000  | 1.466670000  | 1.528092000  | P                                                                          | 2.136523000  | -1.045455000 | 0.061056000  |
| H                                       | 4.850316000  | 1.290819000  | -0.633966000 | C                                                                          | -4.499881000 | 0.558079000  | -0.806504000 |
| C                                       | 5.781064000  | 1.052538000  | 2.341388000  | C                                                                          | -3.256371000 | -1.566055000 | -0.658060000 |
| O                                       | 3.867367000  | 2.463533000  | 1.771116000  | C                                                                          | -1.984830000 | 0.634766000  | 3.125000000  |
| H                                       | 6.219449000  | 1.822888000  | 2.978525000  | C                                                                          | -4.001305000 | 3.025194000  | 0.164646000  |
| H                                       | 5.581997000  | 0.153637000  | 2.933682000  | H                                                                          | -5.349060000 | 1.477863000  | 1.012673000  |
| H                                       | 6.933315000  | -0.255771000 | 0.896365000  | H                                                                          | -3.090404000 | 3.208684000  | 2.180535000  |
| H                                       | 7.064392000  | 1.504266000  | 0.585269000  | H                                                                          | -1.837863000 | 3.151324000  | 0.917776000  |
| Au                                      | -0.110394000 | -0.333664000 | 0.471028000  | C                                                                          | 2.317234000  | -2.332427000 | -1.352401000 |
| P                                       | -2.520813000 | -0.646491000 | 0.554138000  | C                                                                          | 3.586687000  | 0.102891000  | -0.098382000 |
| H                                       | 2.309587000  | 0.132320000  | 1.597656000  | C                                                                          | 2.252364000  | -1.813896000 | 1.828215000  |
| C                                       | 3.927257000  | -2.303229000 | -1.712890000 | C                                                                          | -5.471714000 | -0.638708000 | -0.668785000 |
| H                                       | 1.742383000  | -1.903144000 | -1.620826000 | H                                                                          | -4.647750000 | 1.070102000  | -1.765205000 |
| H                                       | 2.706604000  | -0.621688000 | -2.354439000 | C                                                                          | -4.686489000 | -1.879080000 | -1.175017000 |
| C                                       | -3.036316000 | -0.213148000 | 2.365847000  | H                                                                          | -2.448913000 | -2.095677000 | -1.174366000 |
| C                                       | -3.633843000 | 0.379763000  | -0.527006000 | H                                                                          | -3.172458000 | -1.837311000 | 0.409414000  |
| C                                       | -2.846641000 | -2.477603000 | 0.064599000  | C                                                                          | -2.200578000 | -0.360965000 | 4.245625000  |
| C                                       | -4.405367000 | -0.735222000 | 2.840235000  | H                                                                          | -1.977362000 | 1.665158000  | 3.495769000  |
| C                                       | -1.959109000 | -0.755121000 | 3.332924000  | H                                                                          | -1.057037000 | 0.448895000  | 2.573910000  |
| C                                       | -3.021889000 | 1.329402000  | 2.443697000  | H                                                                          | -3.652829000 | 3.232560000  | -0.849218000 |
| H                                       | -5.239287000 | -0.334239000 | 2.262437000  | H                                                                          | -4.733477000 | 3.784884000  | 0.442139000  |
| H                                       | -4.556842000 | -0.414581000 | 3.877654000  | H                                                                          | -2.204884000 | -1.385756000 | 3.864828000  |
| H                                       | -4.460162000 | -1.826615000 | 2.832617000  | H                                                                          | -3.147555000 | -0.174991000 | 4.759085000  |
| C                                       | -3.176058000 | 1.384115000  | -1.418222000 | H                                                                          | -1.391101000 | -0.268077000 | 4.975473000  |

|   |              |              |              |   |              |              |              |
|---|--------------|--------------|--------------|---|--------------|--------------|--------------|
| C | -5.027072000 | 0.207426000  | -0.388033000 | C | 1.243125000  | -3.424872000 | -1.170935000 |
| C | -4.127525000 | 2.170119000  | -2.097230000 | C | 2.034587000  | -1.562349000 | -2.661842000 |
| C | -1.754241000 | 1.709447000  | -1.757510000 | C | 3.700701000  | -2.998595000 | -1.484498000 |
| C | -5.496268000 | 1.984548000  | -1.936854000 | C | 3.472380000  | 1.490640000  | -0.368228000 |
| H | -3.767618000 | 2.932480000  | -2.781066000 | C | 4.876048000  | -0.424304000 | 0.124043000  |
| C | -5.950746000 | 0.987090000  | -1.077861000 | C | 0.893283000  | -2.467545000 | 2.165426000  |
| H | -6.197390000 | 2.607865000  | -2.483371000 | C | 2.478119000  | -0.629950000 | 2.794289000  |
| H | -7.013593000 | 0.815098000  | -0.938801000 | C | 3.352573000  | -2.869350000 | 2.051108000  |
| H | -5.406826000 | -0.552374000 | 0.279221000  | H | 1.205884000  | -4.038983000 | -2.077812000 |
| C | -1.244706000 | 2.980790000  | -1.447170000 | H | 1.471484000  | -4.094815000 | -0.337822000 |
| C | -0.978318000 | 0.854908000  | -2.555974000 | H | 0.246654000  | -3.000284000 | -1.013168000 |
| C | 0.003123000  | 3.387465000  | -1.923637000 | H | 2.099512000  | -2.260596000 | -3.504135000 |
| H | -1.846620000 | 3.662536000  | -0.852978000 | H | 2.772205000  | -0.772637000 | -2.832948000 |
| C | 0.761044000  | 2.531424000  | -2.726231000 | H | 1.036344000  | -1.114411000 | -2.670671000 |
| H | 0.362625000  | 4.388987000  | -1.701177000 | H | 4.479883000  | -2.277524000 | -1.739470000 |
| C | 0.266190000  | 1.263865000  | -3.038630000 | H | 3.654185000  | -3.727026000 | -2.302253000 |
| H | 1.714467000  | 2.860179000  | -3.130645000 | H | 4.005323000  | -3.541651000 | -0.587469000 |
| H | 0.835906000  | 0.598926000  | -3.680863000 | C | 4.640433000  | 2.276253000  | -0.374636000 |
| H | -1.370227000 | -0.117358000 | -2.835511000 | C | 2.215977000  | 2.245923000  | -0.681720000 |
| C | -4.318859000 | -2.929561000 | 0.012870000  | C | 6.019528000  | 0.368595000  | 0.102855000  |
| C | -2.075803000 | -3.392349000 | 1.039288000  | H | 4.995856000  | -1.480051000 | 0.320538000  |
| C | -2.251024000 | -2.638209000 | -1.352477000 | H | 0.682414000  | -3.339354000 | 1.543327000  |
| H | -4.882247000 | -2.410044000 | -0.764584000 | H | 0.916352000  | -2.805321000 | 3.207995000  |
| H | -4.839895000 | -2.808427000 | 0.965215000  | H | 0.062357000  | -1.765983000 | 2.052087000  |
| H | -4.341384000 | -3.997849000 | -0.232358000 | H | 3.456861000  | -0.164805000 | 2.656277000  |
| H | -2.543319000 | -3.425874000 | 2.026958000  | H | 1.712777000  | 0.145015000  | 2.676885000  |
| H | -2.082600000 | -4.414828000 | 0.644418000  | H | 2.424071000  | -0.997908000 | 3.825328000  |
| H | -1.031993000 | -3.085783000 | 1.158190000  | H | 4.359790000  | -2.476898000 | 1.903460000  |
| H | -2.769118000 | -2.009413000 | -2.083406000 | H | 3.220345000  | -3.749497000 | 1.417289000  |
| H | -1.183843000 | -2.397903000 | -1.378112000 | H | 3.296703000  | -3.211962000 | 3.090951000  |
| H | -2.370610000 | -3.679740000 | -1.672284000 | H | -5.729460000 | -0.782286000 | 0.387992000  |
| H | -2.206722000 | -0.424464000 | 4.348471000  | H | -6.408251000 | -0.483029000 | -1.212187000 |
| H | -1.914960000 | -1.845873000 | 3.345758000  | C | -4.687847000 | -1.937355000 | -2.715199000 |
| H | -0.961663000 | -0.379846000 | 3.088238000  | C | -5.238798000 | -3.190001000 | -0.602398000 |
| H | -3.177922000 | 1.633647000  | 3.485132000  | C | 5.900189000  | 1.734681000  | -0.141935000 |

|                          |              |              |              |                          |              |              |              |
|--------------------------|--------------|--------------|--------------|--------------------------|--------------|--------------|--------------|
| H                        | -3.812422000 | 1.782058000  | 1.840235000  | H                        | 4.543160000  | 3.337005000  | -0.583825000 |
| H                        | -2.060477000 | 1.740508000  | 2.117078000  | C                        | 1.708157000  | 3.170412000  | 0.244940000  |
| C                        | 2.851635000  | 2.977862000  | 0.788145000  | C                        | 1.642440000  | 2.195063000  | -1.962420000 |
| C                        | 1.690410000  | 3.504724000  | 1.595750000  | H                        | 6.991698000  | -0.081014000 | 0.279321000  |
| H                        | 2.574463000  | 2.149285000  | 0.136706000  | H                        | 6.778134000  | 2.373064000  | -0.159231000 |
| H                        | 3.382457000  | 3.761522000  | 0.242435000  | C                        | 0.653956000  | 4.019490000  | -0.099344000 |
| H                        | 1.999851000  | 4.305289000  | 2.271954000  | H                        | 2.162823000  | 3.241889000  | 1.228893000  |
| H                        | 1.218170000  | 2.702310000  | 2.167293000  | C                        | 0.589227000  | 3.044177000  | -2.307577000 |
| H                        | 0.947146000  | 3.898812000  | 0.897599000  | H                        | 2.047787000  | 1.513521000  | -2.703156000 |
| H                        | 5.393187000  | -0.701551000 | -1.825418000 | C                        | 0.093617000  | 3.961713000  | -1.378393000 |
| H                        | 5.925307000  | -2.028518000 | -0.792839000 | H                        | 0.295627000  | 4.750132000  | 0.620815000  |
| C                        | 3.730584000  | -3.600339000 | -0.904895000 | H                        | 0.176178000  | 3.006544000  | -3.311396000 |
| H                        | 2.909985000  | -4.192619000 | -1.323245000 | H                        | -0.702471000 | 4.646046000  | -1.657796000 |
| H                        | 4.633810000  | -4.219741000 | -0.930390000 | H                        | -4.296477000 | -1.018551000 | -3.166908000 |
| H                        | 3.486763000  | -3.399434000 | 0.143696000  | H                        | -4.070039000 | -2.767623000 | -3.073701000 |
| C                        | 4.226432000  | -2.643965000 | -3.177699000 | H                        | -5.702658000 | -2.088885000 | -3.096767000 |
| H                        | 5.134266000  | -3.250696000 | -3.267647000 | H                        | -4.640243000 | -4.047304000 | -0.928813000 |
| H                        | 3.404408000  | -3.215931000 | -3.621460000 | H                        | -5.241178000 | -3.176952000 | 0.493127000  |
| H                        | 4.367035000  | -1.738213000 | -3.778516000 | H                        | -6.266909000 | -3.360619000 | -0.938129000 |
| <b>Int4</b>              |              |              |              | <b>Int1'</b>             |              |              |              |
| E(RM06) = -1876.59288372 |              |              |              | E(RM06) = -1876.51206685 |              |              |              |
| C                        | -2.276018000 | 1.045686000  | -0.622312000 | C                        | -5.157405000 | 1.130532000  | 0.067172000  |
| C                        | -2.780617000 | 1.689071000  | 0.675748000  | C                        | -2.023840000 | 1.132983000  | -0.389811000 |
| Au                       | -0.308318000 | -0.024099000 | 0.013214000  | C                        | -5.337377000 | 0.183280000  | -0.862193000 |
| C                        | -2.839483000 | -0.205048000 | -0.733809000 | C                        | -5.752762000 | -1.217218000 | -0.594331000 |
| H                        | -1.829620000 | 1.599143000  | -1.447208000 | C                        | -5.396318000 | -2.308122000 | -1.597537000 |
| O                        | -1.795770000 | 2.369054000  | 1.429239000  | C                        | -6.814426000 | -1.816453000 | -1.493433000 |
| C                        | -3.441193000 | 0.532429000  | 1.501105000  | H                        | -4.810572000 | -2.038476000 | -2.471921000 |
| C                        | -4.172604000 | 2.420701000  | 0.682293000  | H                        | -5.182827000 | -3.292992000 | -1.193913000 |
| P                        | 1.824851000  | -0.704241000 | 0.789873000  | H                        | -5.231356000 | 0.438332000  | -1.917647000 |
| C                        | -3.742213000 | -0.531647000 | 0.425627000  | C                        | -4.869429000 | 2.575481000  | -0.235569000 |
| C                        | -2.869752000 | -1.344816000 | -1.716231000 | H                        | -5.309149000 | 0.862275000  | 1.110513000  |
| C                        | -1.323343000 | 3.600872000  | 0.866893000  | C                        | -1.698573000 | -0.051157000 | -0.247442000 |
| C                        | -4.623696000 | 1.480667000  | 1.834025000  | C                        | -2.327345000 | 2.547376000  | -0.589708000 |
| H                        | -2.845811000 | 0.141171000  | 2.331815000  | Au                       | 0.472393000  | 0.361127000  | -0.174793000 |
| H                        | -4.148474000 | 3.489903000  | 0.901826000  | H                        | -1.898578000 | -1.104105000 | -0.161383000 |

|   |              |              |              |   |              |              |              |
|---|--------------|--------------|--------------|---|--------------|--------------|--------------|
| H | -4.735170000 | 2.271489000  | -0.243869000 | C | -3.506690000 | 3.149454000  | 0.247704000  |
| C | 1.892679000  | -2.620473000 | 0.769441000  | H | -1.418096000 | 3.109742000  | -0.344055000 |
| C | 3.239141000  | -0.109896000 | -0.244760000 | H | -2.516000000 | 2.712120000  | -1.658342000 |
| C | 2.034164000  | 0.080765000  | 2.539618000  | O | -5.872142000 | -1.590636000 | 0.751783000  |
| C | -3.577135000 | -2.050207000 | 0.566983000  | H | -7.532862000 | -2.458513000 | -0.995350000 |
| H | -4.762035000 | -0.350682000 | 0.045069000  | H | -7.220194000 | -1.201946000 | -2.290777000 |
| C | -3.505909000 | -2.553858000 | -0.917501000 | C | -4.663433000 | -1.971081000 | 1.406228000  |
| H | -3.491446000 | -1.070856000 | -2.579033000 | P | 2.809860000  | 0.659972000  | -0.014803000 |
| H | -1.879288000 | -1.577825000 | -2.115498000 | C | 3.117092000  | 1.678522000  | 1.589995000  |
| C | -0.618375000 | 4.389074000  | 1.957802000  | C | 3.738696000  | -0.928217000 | 0.156493000  |
| H | -2.166186000 | 4.179156000  | 0.466096000  | C | 3.407261000  | 1.490682000  | -1.635310000 |
| H | -0.640100000 | 3.387753000  | 0.031804000  | C | 4.495783000  | 2.361607000  | 1.677005000  |
| H | -5.629368000 | 1.056572000  | 1.768600000  | C | 2.029341000  | 2.770961000  | 1.705363000  |
| H | -4.503275000 | 1.952092000  | 2.811559000  | C | 2.944717000  | 0.693518000  | 2.765950000  |
| H | 0.221639000  | 3.822862000  | 2.369451000  | C | 3.135823000  | -2.211759000 | 0.133645000  |
| H | -1.308552000 | 4.618370000  | 2.774151000  | C | 5.129975000  | -0.844940000 | 0.375674000  |
| H | -0.233621000 | 5.330788000  | 1.554518000  | C | 4.936929000  | 1.638069000  | -1.761167000 |
| C | 0.804065000  | -3.161631000 | 1.717620000  | C | 2.744963000  | 2.877098000  | -1.758620000 |
| C | 1.574566000  | -3.049370000 | -0.678761000 | C | 2.914997000  | 0.585513000  | -2.786211000 |
| C | 3.257539000  | -3.226097000 | 1.154257000  | H | 5.327058000  | 1.655086000  | 1.654931000  |
| C | 3.108799000  | 0.621919000  | -1.452554000 | H | 4.556408000  | 2.890809000  | 2.634493000  |
| C | 4.537355000  | -0.357230000 | 0.249650000  | H | 4.641801000  | 3.105188000  | 0.889822000  |
| C | 0.656948000  | 0.079801000  | 3.242166000  | H | 2.195061000  | 3.325958000  | 2.635342000  |
| C | 2.466881000  | 1.545753000  | 2.317135000  | H | 2.060159000  | 3.490916000  | 0.884648000  |
| C | 3.050337000  | -0.623915000 | 3.459856000  | H | 1.024484000  | 2.341098000  | 1.751016000  |
| H | 0.733495000  | -4.247723000 | 1.592258000  | H | 2.977927000  | 1.257903000  | 3.704217000  |
| H | 1.036156000  | -2.971439000 | 2.768653000  | H | 3.736888000  | -0.057532000 | 2.797189000  |
| H | -0.179881000 | -2.735822000 | 1.498777000  | H | 1.979437000  | 0.177032000  | 2.725569000  |
| H | 1.579960000  | -4.143721000 | -0.732338000 | C | 3.951152000  | -3.339712000 | 0.340971000  |
| H | 2.326480000  | -2.682059000 | -1.383428000 | C | 1.687350000  | -2.528690000 | -0.100143000 |
| H | 0.590787000  | -2.701573000 | -1.006648000 | C | 5.916871000  | -1.975443000 | 0.572803000  |
| H | 4.039215000  | -2.962650000 | 0.439103000  | H | 5.615864000  | 0.121057000  | 0.396188000  |
| H | 3.160243000  | -4.317453000 | 1.139479000  | C | 5.321278000  | -3.234758000 | 0.558400000  |
| H | 3.586765000  | -2.945358000 | 2.156016000  | H | 3.485297000  | -4.319892000 | 0.321523000  |
| C | 4.278143000  | 1.075850000  | -2.091573000 | C | 0.877174000  | -2.929256000 | 0.976557000  |

|   |              |              |              |   |              |              |              |
|---|--------------|--------------|--------------|---|--------------|--------------|--------------|
| C | 1.837395000  | 0.977400000  | -2.163868000 | C | 1.174533000  | -2.636311000 | -1.405347000 |
| C | 5.679388000  | 0.094563000  | -0.404055000 | H | 5.916273000  | -4.129500000 | 0.712510000  |
| H | 4.665608000  | -0.909786000 | 1.170212000  | H | 6.984170000  | -1.867989000 | 0.738149000  |
| H | 0.245010000  | -0.924754000 | 3.364749000  | C | -0.408411000 | -3.428418000 | 0.754264000  |
| H | 0.781866000  | 0.506366000  | 4.244061000  | H | 1.270476000  | -2.876275000 | 1.987588000  |
| H | -0.073752000 | 0.694101000  | 2.709552000  | C | -0.109899000 | -3.137561000 | -1.626655000 |
| H | 3.481300000  | 1.624850000  | 1.920754000  | H | 1.799597000  | -2.363505000 | -2.249824000 |
| H | 1.788609000  | 2.071183000  | 1.637052000  | C | -0.902508000 | -3.541671000 | -0.548382000 |
| H | 2.438313000  | 2.066997000  | 3.280355000  | H | -1.011866000 | -3.752237000 | 1.597168000  |
| H | 4.062267000  | -0.648277000 | 3.051515000  | H | -1.888534000 | -3.961892000 | -0.724227000 |
| H | 2.748155000  | -1.642654000 | 3.713837000  | H | -0.480367000 | -3.235649000 | -2.642690000 |
| H | 3.102839000  | -0.062433000 | 4.399346000  | H | 5.441522000  | 0.670443000  | -1.794009000 |
| H | -2.638530000 | -2.271196000 | 1.091069000  | H | 5.379217000  | 2.239383000  | -0.964422000 |
| H | -4.387406000 | -2.531739000 | 1.121662000  | H | 5.152452000  | 2.146569000  | -2.707507000 |
| C | -4.923020000 | -2.845057000 | -1.449673000 | H | 3.139191000  | 3.590530000  | -1.030468000 |
| C | -2.650469000 | -3.821952000 | -1.040320000 | H | 2.955320000  | 3.280191000  | -2.755173000 |
| C | 5.548312000  | 0.821759000  | -1.584988000 | H | 1.657432000  | 2.824964000  | -1.644592000 |
| H | 4.172225000  | 1.633333000  | -3.016854000 | H | 3.358165000  | -0.413422000 | -2.735532000 |
| C | 1.414387000  | 2.316715000  | -2.199921000 | H | 1.825648000  | 0.483534000  | -2.796298000 |
| C | 1.167990000  | 0.040152000  | -2.969575000 | H | 3.219074000  | 1.032589000  | -3.739111000 |
| H | 6.659239000  | -0.118517000 | 0.011321000  | C | -5.015107000 | -2.386792000 | 2.825237000  |
| H | 6.425372000  | 1.186587000  | -2.110396000 | H | -3.950411000 | -1.133629000 | 1.414106000  |
| C | 0.348003000  | 2.708139000  | -3.013097000 | H | -4.189031000 | -2.804588000 | 0.864760000  |
| H | 1.944915000  | 3.057977000  | -1.609157000 | H | -5.722472000 | -3.220424000 | 2.816102000  |
| C | 0.105748000  | 0.433184000  | -3.787162000 | H | -5.475402000 | -1.556402000 | 3.368014000  |
| H | 1.509500000  | -0.989914000 | -2.988879000 | H | -4.116547000 | -2.698892000 | 3.367147000  |
| C | -0.306682000 | 1.768161000  | -3.813108000 | H | -4.955683000 | 2.751495000  | -1.315659000 |
| H | 0.048819000  | 3.751826000  | -3.042599000 | H | -5.651070000 | 3.188032000  | 0.235471000  |
| H | -0.379060000 | -0.298537000 | -4.426976000 | C | -3.282611000 | 2.903171000  | 1.748664000  |
| H | -1.114592000 | 2.077486000  | -4.469575000 | H | -2.350505000 | 3.369127000  | 2.088096000  |
| H | -5.585242000 | -1.976449000 | -1.362358000 | H | -4.099569000 | 3.341476000  | 2.330549000  |
| H | -4.890438000 | -3.128489000 | -2.507214000 | H | -3.234821000 | 1.837590000  | 1.989493000  |
| H | -5.383934000 | -3.670781000 | -0.898201000 | C | -3.497821000 | 4.665689000  | -0.031851000 |
| H | -2.600139000 | -4.167904000 | -2.078574000 | H | -4.306067000 | 5.157204000  | 0.517583000  |
| H | -1.626778000 | -3.649151000 | -0.691322000 | H | -2.554711000 | 5.125507000  | 0.283214000  |

|                                                                             |              |              |              |                                          |              |              |              |
|-----------------------------------------------------------------------------|--------------|--------------|--------------|------------------------------------------|--------------|--------------|--------------|
| H                                                                           | -3.073544000 | -4.636055000 | -0.442183000 | H                                        | -3.641929000 | 4.879938000  | -1.096586000 |
| <b>TS<sub>1-2'</sub></b><br>E(RM06) = -1876.49946985<br>Frequency -207.1800 |              |              |              | <b>Int2'</b><br>E(RM06) = -1876.51328126 |              |              |              |
| C                                                                           | 4.749836000  | 0.930027000  | -0.158180000 | C                                        | -4.368246000 | 0.579505000  | 0.633693000  |
| C                                                                           | 2.614870000  | 1.013400000  | 0.285073000  | C                                        | -2.861110000 | 0.898309000  | 0.197957000  |
| C                                                                           | 4.782439000  | 0.038449000  | 0.883220000  | C                                        | -4.343232000 | 0.405453000  | -0.789804000 |
| C                                                                           | 4.912132000  | -1.414852000 | 0.745029000  | C                                        | -4.561541000 | -0.881651000 | -1.480258000 |
| C                                                                           | 4.188574000  | -2.337600000 | 1.734211000  | C                                        | -3.925427000 | -1.142913000 | -2.836020000 |
| C                                                                           | 5.648791000  | -2.105128000 | 1.904965000  | C                                        | -5.358298000 | -0.725978000 | -2.791226000 |
| H                                                                           | 3.489196000  | -1.885949000 | 2.430386000  | H                                        | -3.178547000 | -0.437061000 | -3.186462000 |
| H                                                                           | 3.875964000  | -3.295059000 | 1.331500000  | H                                        | -3.712348000 | -2.180350000 | -3.071208000 |
| H                                                                           | 4.809152000  | 0.422977000  | 1.901879000  | H                                        | -4.438752000 | 1.290611000  | -1.412841000 |
| C                                                                           | 5.007207000  | 2.406160000  | 0.011737000  | C                                        | -4.898362000 | 1.886024000  | 1.246994000  |
| H                                                                           | 4.787210000  | 0.523366000  | -1.164598000 | H                                        | -4.496583000 | -0.338989000 | 1.199371000  |
| C                                                                           | 1.837728000  | 0.002000000  | 0.076068000  | C                                        | -1.864933000 | -0.027769000 | 0.070768000  |
| C                                                                           | 2.658378000  | 2.456786000  | 0.633064000  | C                                        | -2.726767000 | 2.408553000  | 0.301360000  |
| Au                                                                          | -0.243717000 | 0.285260000  | 0.048693000  | Au                                       | 0.146434000  | 0.271560000  | -0.087561000 |
| H                                                                           | 2.166661000  | -1.016757000 | -0.091367000 | H                                        | -2.200474000 | -1.063553000 | 0.029866000  |
| C                                                                           | 3.707298000  | 3.228740000  | -0.195169000 | C                                        | -3.677972000 | 2.833668000  | 1.451057000  |
| H                                                                           | 1.648015000  | 2.845687000  | 0.463114000  | H                                        | -1.684916000 | 2.681265000  | 0.485865000  |
| H                                                                           | 2.871937000  | 2.573839000  | 1.704388000  | H                                        | -3.025092000 | 2.898137000  | -0.635948000 |
| O                                                                           | 5.253731000  | -1.907227000 | -0.512901000 | O                                        | -4.972027000 | -1.952167000 | -0.690003000 |
| H                                                                           | 6.331832000  | -2.882314000 | 1.580880000  | H                                        | -6.117873000 | -1.487402000 | -2.928412000 |
| H                                                                           | 6.000135000  | -1.492108000 | 2.728388000  | H                                        | -5.635621000 | 0.270169000  | -3.120170000 |
| C                                                                           | 4.203999000  | -2.306329000 | -1.406082000 | C                                        | -4.025699000 | -2.967272000 | -0.314826000 |
| P                                                                           | -2.588131000 | 0.773831000  | 0.005194000  | P                                        | 2.505615000  | 0.704422000  | -0.447481000 |
| C                                                                           | -2.906352000 | 1.792466000  | -1.598926000 | C                                        | 2.950007000  | 2.351815000  | 0.447136000  |
| C                                                                           | -3.734585000 | -0.680223000 | -0.056769000 | C                                        | 3.697181000  | -0.578386000 | 0.162946000  |
| C                                                                           | -2.989815000 | 1.696928000  | 1.639134000  | C                                        | 2.735635000  | 0.756403000  | -2.354349000 |
| C                                                                           | -4.217516000 | 2.600462000  | -1.630217000 | C                                        | 4.213487000  | 3.073542000  | -0.058434000 |
| C                                                                           | -1.730816000 | 2.773029000  | -1.810220000 | C                                        | 1.752671000  | 3.319431000  | 0.313417000  |
| C                                                                           | -2.898764000 | 0.771943000  | -2.758457000 | C                                        | 3.118870000  | 1.998936000  | 1.940534000  |
| C                                                                           | -3.299539000 | -2.028485000 | -0.029905000 | C                                        | 3.297848000  | -1.794528000 | 0.772312000  |
| C                                                                           | -5.119878000 | -0.429123000 | -0.148643000 | C                                        | 5.076903000  | -0.347229000 | -0.017876000 |
| C                                                                           | -4.476392000 | 2.026759000  | 1.877021000  | C                                        | 4.184616000  | 0.907157000  | -2.854981000 |



|   |              |              |              |   |              |              |              |
|---|--------------|--------------|--------------|---|--------------|--------------|--------------|
| C | -2.168035000 | 3.000767000  | 1.688729000  | C | 1.879330000  | 1.905731000  | -2.924717000 |
| C | -2.518161000 | 0.756848000  | 2.771439000  | C | 2.186210000  | -0.591609000 | -2.873873000 |
| H | -5.107685000 | 1.975122000  | -1.546561000 | H | 5.119603000  | 2.474543000  | 0.047395000  |
| H | -4.282419000 | 3.115614000  | -2.595409000 | H | 4.359747000  | 3.976973000  | 0.544848000  |
| H | -4.250884000 | 3.368782000  | -0.853896000 | H | 4.123088000  | 3.395148000  | -1.098943000 |
| H | -1.887342000 | 3.303680000  | -2.756272000 | H | 1.986133000  | 4.242653000  | 0.856025000  |
| H | -1.661050000 | 3.524701000  | -1.021104000 | H | 1.540392000  | 3.591117000  | -0.722789000 |
| H | -0.771999000 | 2.250977000  | -1.873732000 | H | 0.843279000  | 2.895398000  | 0.748379000  |
| H | -2.951571000 | 1.316625000  | -3.707801000 | H | 3.248262000  | 2.925271000  | 2.511462000  |
| H | -3.750770000 | 0.089465000  | -2.716077000 | H | 3.992169000  | 1.368346000  | 2.122654000  |
| H | -1.978871000 | 0.177375000  | -2.769793000 | H | 2.234396000  | 1.488687000  | 2.336532000  |
| C | -4.264174000 | -3.051061000 | -0.090653000 | C | 4.287463000  | -2.727687000 | 1.132269000  |
| C | -1.881768000 | -2.512244000 | 0.050426000  | C | 1.896643000  | -2.197583000 | 1.120590000  |
| C | -6.057129000 | -1.455821000 | -0.211177000 | C | 6.041017000  | -1.275936000 | 0.362791000  |
| H | -5.482601000 | 0.589028000  | -0.167915000 | H | 5.413141000  | 0.573517000  | -0.473985000 |
| C | -5.625717000 | -2.780023000 | -0.180171000 | C | 5.642365000  | -2.482701000 | 0.933531000  |
| H | -3.922122000 | -4.081087000 | -0.067915000 | H | 3.971811000  | -3.658061000 | 1.594107000  |
| C | -1.192885000 | -2.864155000 | -1.121370000 | C | 1.305008000  | -1.748182000 | 2.312505000  |
| C | -1.297965000 | -2.809835000 | 1.292116000  | C | 1.227189000  | -3.168346000 | 0.360047000  |
| H | -6.340377000 | -3.595949000 | -0.226123000 | H | 6.377943000  | -3.224067000 | 1.230029000  |
| H | -7.113912000 | -1.218100000 | -0.282049000 | H | 7.092729000  | -1.056443000 | 0.207581000  |
| C | 0.048068000  | -3.500656000 | -1.053490000 | C | 0.074725000  | -2.258115000 | 2.733438000  |
| H | -1.648254000 | -2.667215000 | -2.087441000 | H | 1.829826000  | -1.024144000 | 2.928591000  |
| C | -0.057094000 | -3.446559000 | 1.359947000  | C | -0.004871000 | -3.675616000 | 0.779257000  |
| H | -1.833310000 | -2.570416000 | 2.206026000  | H | 1.687145000  | -3.544045000 | -0.549345000 |
| C | 0.614263000  | -3.801027000 | 0.187537000  | C | -0.580964000 | -3.226767000 | 1.969734000  |
| H | 0.555188000  | -3.787824000 | -1.970110000 | H | -0.355625000 | -1.918649000 | 3.671091000  |
| H | 1.558766000  | -4.335151000 | 0.240826000  | H | -1.521310000 | -3.647227000 | 2.314787000  |
| H | 0.368414000  | -3.691483000 | 2.328820000  | H | -0.497893000 | -4.442813000 | 0.188868000  |
| H | -5.084926000 | 1.126660000  | 1.980867000  | H | 4.802280000  | 0.047805000  | -2.587906000 |
| H | -4.908122000 | 2.655098000  | 1.095203000  | H | 4.670949000  | 1.814985000  | -2.492878000 |
| H | -4.556689000 | 2.581574000  | 2.818842000  | H | 4.165651000  | 0.964844000  | -3.949419000 |
| H | -2.538530000 | 3.750850000  | 0.984806000  | H | 2.297025000  | 2.888306000  | -2.688794000 |
| H | -2.248550000 | 3.431545000  | 2.693120000  | H | 1.853679000  | 1.819152000  | -4.016937000 |
| H | -1.106626000 | 2.825437000  | 1.486116000  | H | 0.846579000  | 1.870114000  | -2.563112000 |

|                                                                            |              |              |              |                                          |              |              |              |
|----------------------------------------------------------------------------|--------------|--------------|--------------|------------------------------------------|--------------|--------------|--------------|
| H                                                                          | -3.060198000 | -0.193556000 | 2.762570000  | H                                        | 2.734543000  | -1.442427000 | -2.458293000 |
| H                                                                          | -1.446792000 | 0.543838000  | 2.708880000  | H                                        | 1.124559000  | -0.719268000 | -2.641738000 |
| H                                                                          | -2.712202000 | 1.239058000  | 3.736243000  | H                                        | 2.300065000  | -0.623843000 | -3.963439000 |
| C                                                                          | 4.851730000  | -3.015111000 | -2.583012000 | C                                        | -4.807061000 | -4.230900000 | 0.002674000  |
| H                                                                          | 3.638185000  | -1.428029000 | -1.747045000 | H                                        | -3.454419000 | -2.640171000 | 0.565503000  |
| H                                                                          | 3.501224000  | -2.972363000 | -0.887439000 | H                                        | -3.310538000 | -3.139997000 | -1.128726000 |
| H                                                                          | 5.398779000  | -3.899869000 | -2.246837000 | H                                        | -5.347161000 | -4.585230000 | -0.879313000 |
| H                                                                          | 5.554022000  | -2.351652000 | -3.094865000 | H                                        | -5.533472000 | -4.045405000 | 0.798491000  |
| H                                                                          | 4.087821000  | -3.328900000 | -3.300711000 | H                                        | -4.126917000 | -5.021380000 | 0.334352000  |
| H                                                                          | 5.391153000  | 2.597665000  | 1.020356000  | H                                        | -5.629793000 | 2.341359000  | 0.571274000  |
| H                                                                          | 5.781250000  | 2.726944000  | -0.694461000 | H                                        | -5.415664000 | 1.680327000  | 2.188031000  |
| C                                                                          | 3.309186000  | 3.271366000  | -1.681327000 | C                                        | -3.015831000 | 2.550455000  | 2.812730000  |
| H                                                                          | 2.379520000  | 3.833962000  | -1.817359000 | H                                        | -2.118574000 | 3.164473000  | 2.943726000  |
| H                                                                          | 4.085368000  | 3.767370000  | -2.272765000 | H                                        | -3.702289000 | 2.782913000  | 3.633423000  |
| H                                                                          | 3.154500000  | 2.270669000  | -2.095968000 | H                                        | -2.719029000 | 1.500705000  | 2.911710000  |
| C                                                                          | 3.881363000  | 4.656360000  | 0.341755000  | C                                        | -4.082214000 | 4.310248000  | 1.360772000  |
| H                                                                          | 4.675483000  | 5.179294000  | -0.200608000 | H                                        | -4.800836000 | 4.569219000  | 2.145351000  |
| H                                                                          | 2.961662000  | 5.238007000  | 0.220045000  | H                                        | -3.212232000 | 4.963881000  | 1.483907000  |
| H                                                                          | 4.144473000  | 4.657792000  | 1.405274000  | H                                        | -4.543133000 | 4.542028000  | 0.394114000  |
| <b>TS<sub>2-2</sub>"</b><br>E(RM06) = -1876.50763608<br>Frequency -70.8891 |              |              |              | <b>Int2"</b><br>E(RM06) = -1876.52097889 |              |              |              |
| C                                                                          | -4.319931000 | -0.638877000 | -0.791421000 | C                                        | 4.258175000  | 0.527688000  | -0.863577000 |
| C                                                                          | -2.862790000 | -0.952148000 | -0.121731000 | C                                        | 2.865590000  | 0.935513000  | -0.045397000 |
| C                                                                          | -4.379849000 | -0.480134000 | 0.629778000  | C                                        | 4.368440000  | 0.567512000  | 0.565190000  |
| C                                                                          | -4.610321000 | 0.818628000  | 1.316673000  | C                                        | 4.601675000  | -0.641001000 | 1.418265000  |
| C                                                                          | -4.131827000 | 0.961044000  | 2.747583000  | C                                        | 4.326139000  | -0.523943000 | 2.897886000  |
| C                                                                          | -5.599082000 | 0.779931000  | 2.485920000  | C                                        | 5.755075000  | -0.528889000 | 2.401799000  |
| H                                                                          | -3.555859000 | 0.147052000  | 3.177749000  | H                                        | 3.899013000  | 0.402385000  | 3.271172000  |
| H                                                                          | -3.808715000 | 1.950666000  | 3.054246000  | H                                        | 3.974007000  | -1.414637000 | 3.409027000  |
| H                                                                          | -4.623057000 | -1.354915000 | 1.227651000  | H                                        | 4.734362000  | 1.489282000  | 1.011646000  |
| C                                                                          | -4.744389000 | -1.953977000 | -1.451639000 | C                                        | 4.584583000  | 1.755547000  | -1.703194000 |
| H                                                                          | -4.355160000 | 0.278319000  | -1.370215000 | H                                        | 4.220755000  | -0.453742000 | -1.322149000 |
| C                                                                          | -1.877714000 | -0.000787000 | -0.030709000 | C                                        | 1.876390000  | -0.014598000 | 0.096670000  |
| C                                                                          | -2.703137000 | -2.459858000 | -0.218974000 | C                                        | 2.673643000  | 2.419372000  | -0.324140000 |
| Au                                                                         | 0.132364000  | -0.256007000 | 0.161178000  | Au                                       | -0.133238000 | 0.242879000  | 0.234715000  |

|   |              |              |              |   |              |              |              |
|---|--------------|--------------|--------------|---|--------------|--------------|--------------|
| H | -2.241832000 | 1.026914000  | -0.041515000 | H | 2.255357000  | -1.035099000 | 0.171443000  |
| C | -3.498886000 | -2.895104000 | -1.479751000 | C | 3.333388000  | 2.694475000  | -1.704594000 |
| H | -1.644782000 | -2.724447000 | -0.281460000 | H | 1.608806000  | 2.664943000  | -0.322774000 |
| H | -3.107339000 | -2.954101000 | 0.674330000  | H | 3.148947000  | 3.030369000  | 0.453570000  |
| O | -4.623042000 | 1.919486000  | 0.454402000  | O | 4.311173000  | -1.813410000 | 0.701849000  |
| H | -6.250674000 | 1.640746000  | 2.583700000  | H | 6.350058000  | -1.414674000 | 2.591830000  |
| H | -6.063321000 | -0.167817000 | 2.739951000  | H | 6.326928000  | 0.393943000  | 2.424129000  |
| C | -4.079271000 | 3.171236000  | 0.897884000  | C | 4.920825000  | -3.046551000 | 1.101165000  |
| P | 2.498499000  | -0.617355000 | 0.563976000  | P | -2.514042000 | 0.608781000  | 0.549138000  |
| C | 2.886646000  | -2.330404000 | -0.218382000 | C | -2.953324000 | 2.296660000  | -0.251537000 |
| C | 3.665997000  | 0.587970000  | -0.225120000 | C | -3.644059000 | -0.644171000 | -0.220399000 |
| C | 2.814152000  | -0.525387000 | 2.459663000  | C | -2.819292000 | 0.531828000  | 2.449824000  |
| C | 4.244257000  | -2.980745000 | 0.108638000  | C | -4.449418000 | 2.663617000  | -0.264068000 |
| C | 1.803416000  | -3.387879000 | 0.084677000  | C | -2.164805000 | 3.409578000  | 0.468605000  |
| C | 2.822842000  | -2.067895000 | -1.738878000 | C | -2.469566000 | 2.200702000  | -1.715530000 |
| C | 3.245275000  | 1.726388000  | -0.956109000 | C | -3.188862000 | -1.739735000 | -0.997245000 |
| C | 5.051469000  | 0.356103000  | -0.100268000 | C | -5.029406000 | -0.529587000 | 0.019874000  |
| C | 4.287202000  | -0.814088000 | 2.805450000  | C | -4.139833000 | 1.150180000  | 2.946308000  |
| C | 1.887695000  | -1.573798000 | 3.112945000  | C | -1.650727000 | 1.244876000  | 3.167474000  |
| C | 2.409119000  | 0.905524000  | 2.878848000  | C | -2.775868000 | -0.965375000 | 2.826832000  |
| H | 5.090903000  | -2.356663000 | -0.182950000 | H | -5.036876000 | 1.970396000  | -0.868975000 |
| H | 4.335998000  | -3.868345000 | -0.527945000 | H | -4.556466000 | 3.657143000  | -0.714508000 |
| H | 4.343619000  | -3.313444000 | 1.144451000  | H | -4.886516000 | 2.714783000  | 0.735434000  |
| H | 2.023895000  | -4.290327000 | -0.496792000 | H | -2.253925000 | 4.336350000  | -0.109451000 |
| H | 1.722394000  | -3.646895000 | 1.143067000  | H | -2.558765000 | 3.614092000  | 1.467633000  |
| H | 0.823805000  | -3.054907000 | -0.271086000 | H | -1.099849000 | 3.172755000  | 0.557786000  |
| H | 2.957205000  | -3.030214000 | -2.245774000 | H | -2.669485000 | 3.153378000  | -2.219267000 |
| H | 3.652878000  | -1.447554000 | -2.087508000 | H | -2.999670000 | 1.419249000  | -2.268260000 |
| H | 1.864121000  | -1.651592000 | -2.064586000 | H | -1.395229000 | 2.002990000  | -1.781318000 |
| C | 4.220436000  | 2.605178000  | -1.463421000 | C | -4.132818000 | -2.662708000 | -1.483372000 |
| C | 1.828549000  | 2.125900000  | -1.240169000 | C | -1.767464000 | -2.035781000 | -1.370900000 |
| C | 6.001293000  | 1.203654000  | -0.664428000 | C | -5.946897000 | -1.452029000 | -0.474559000 |
| H | 5.403400000  | -0.526104000 | 0.416176000  | H | -5.407565000 | 0.295968000  | 0.606651000  |
| C | 5.582417000  | 2.352371000  | -1.332475000 | C | -5.494581000 | -2.530495000 | -1.231570000 |
| H | 3.889819000  | 3.521647000  | -1.942230000 | H | -3.774780000 | -3.497387000 | -2.077976000 |

|   |              |              |              |   |              |              |              |
|---|--------------|--------------|--------------|---|--------------|--------------|--------------|
| C | 1.130576000  | 1.570343000  | -2.324575000 | C | -1.163001000 | -1.412321000 | -2.473969000 |
| C | 1.241703000  | 3.187863000  | -0.534344000 | C | -1.076175000 | -3.070474000 | -0.720332000 |
| H | 6.305982000  | 3.040078000  | -1.759242000 | H | -6.193687000 | -3.262018000 | -1.624950000 |
| H | 7.054714000  | 0.945247000  | -0.620834000 | H | -7.004621000 | -1.326024000 | -0.265465000 |
| C | -0.124148000 | 2.062996000  | -2.691432000 | C | 0.103659000  | -1.809391000 | -2.910255000 |
| H | 1.587821000  | 0.773188000  | -2.902816000 | H | -1.699298000 | -0.636255000 | -3.011245000 |
| C | -0.013763000 | 3.678307000  | -0.899734000 | C | 0.190212000  | -3.465583000 | -1.155762000 |
| H | 1.783619000  | 3.644635000  | 0.288726000  | H | -1.545027000 | -3.580034000 | 0.116533000  |
| C | -0.697849000 | 3.120761000  | -1.982083000 | C | 0.782462000  | -2.838753000 | -2.254107000 |
| H | -0.638488000 | 1.637669000  | -3.548387000 | H | 0.545509000  | -1.331490000 | -3.779962000 |
| H | -1.660137000 | 3.522685000  | -2.285839000 | H | 1.756102000  | -3.164071000 | -2.608668000 |
| H | -0.442948000 | 4.513878000  | -0.354135000 | H | 0.701553000  | -4.280033000 | -0.650694000 |
| H | 4.965166000  | -0.055805000 | 2.409893000  | H | -5.023234000 | 0.662147000  | 2.531228000  |
| H | 4.617183000  | -1.766629000 | 2.384979000  | H | -4.200661000 | 2.222271000  | 2.743418000  |
| H | 4.407153000  | -0.878764000 | 3.893079000  | H | -4.191635000 | 1.025880000  | 4.034151000  |
| H | 2.198160000  | -2.588017000 | 2.850919000  | H | -1.611715000 | 2.314683000  | 2.953500000  |
| H | 1.933968000  | -1.491794000 | 4.204840000  | H | -1.785923000 | 1.131007000  | 4.249073000  |
| H | 0.854431000  | -1.484617000 | 2.763957000  | H | -0.683110000 | 0.809169000  | 2.902830000  |
| H | 2.980156000  | 1.650650000  | 2.318428000  | H | -3.617266000 | -1.522999000 | 2.409016000  |
| H | 1.356724000  | 1.111644000  | 2.658322000  | H | -1.846658000 | -1.440585000 | 2.494016000  |
| H | 2.608676000  | 1.058974000  | 3.945441000  | H | -2.821376000 | -1.055409000 | 3.917999000  |
| C | -4.695171000 | 4.234300000  | 0.004882000  | C | 4.362708000  | -4.144670000 | 0.213285000  |
| H | -2.983744000 | 3.088691000  | 0.869391000  | H | 4.699965000  | -3.259881000 | 2.156146000  |
| H | -4.418783000 | 3.374787000  | 1.921356000  | H | 6.010233000  | -2.975438000 | 0.988005000  |
| H | -5.782886000 | 4.245580000  | 0.116653000  | H | 4.581873000  | -3.940042000 | -0.838582000 |
| H | -4.509436000 | 3.986091000  | -1.043801000 | H | 3.278980000  | -4.228467000 | 0.334903000  |
| H | -4.279216000 | 5.224044000  | 0.215229000  | H | 4.815319000  | -5.104537000 | 0.477955000  |
| H | -5.555211000 | -2.413489000 | -0.876135000 | H | 5.445600000  | 2.275769000  | -1.268827000 |
| H | -5.129760000 | -1.764332000 | -2.457102000 | H | 4.861417000  | 1.460987000  | -2.719067000 |
| C | -2.670477000 | -2.619629000 | -2.748738000 | C | 2.375573000  | 2.279934000  | -2.837247000 |
| H | -1.759174000 | -3.225882000 | -2.784348000 | H | 1.473713000  | 2.901133000  | -2.828377000 |
| H | -3.267601000 | -2.864263000 | -3.633368000 | H | 2.855231000  | 2.402963000  | -3.813947000 |
| H | -2.419049000 | -1.558699000 | -2.852912000 | H | 2.060962000  | 1.234938000  | -2.745497000 |
| C | -3.950790000 | -4.360671000 | -1.457584000 | C | 3.736311000  | 4.165107000  | -1.872621000 |
| H | -4.559212000 | -4.597637000 | -2.336653000 | H | 4.241885000  | 4.327505000  | -2.830306000 |

|                                                                            |              |              |              |                                                                            |              |              |              |
|----------------------------------------------------------------------------|--------------|--------------|--------------|----------------------------------------------------------------------------|--------------|--------------|--------------|
| H                                                                          | -3.089338000 | -5.036789000 | -1.462480000 | H                                                                          | 2.856684000  | 4.817046000  | -1.850631000 |
| H                                                                          | -4.547848000 | -4.582858000 | -0.566205000 | H                                                                          | 4.414599000  | 4.488260000  | -1.075309000 |
| <b>TS<sub>2-2"</sub></b><br>E(RM06) = -1876.51939777<br>Frequency -17.0197 |              |              |              | <b>TS<sub>2-2"</sub></b><br>E(RM06) = -1876.48996848<br>Frequency -33.1750 |              |              |              |
| C                                                                          | 4.098844000  | 0.410530000  | -1.107630000 | C                                                                          | 4.363831000  | 0.951850000  | -0.505367000 |
| C                                                                          | 3.015806000  | 0.717416000  | 0.160321000  | C                                                                          | 3.991224000  | -0.237563000 | 0.256689000  |
| C                                                                          | 4.504490000  | 0.176887000  | 0.266025000  | C                                                                          | 2.501375000  | -0.653515000 | 0.104561000  |
| C                                                                          | 4.914723000  | -1.186357000 | 0.810406000  | C                                                                          | 5.645482000  | 1.402690000  | -0.842033000 |
| C                                                                          | 6.023699000  | -1.218718000 | 1.838384000  | H                                                                          | 3.534516000  | 1.566854000  | -0.858928000 |
| C                                                                          | 6.301651000  | -1.632253000 | 0.412860000  | C                                                                          | 4.835505000  | -1.527805000 | 0.048339000  |
| H                                                                          | 6.427756000  | -0.276110000 | 2.196746000  | H                                                                          | 4.105604000  | 0.094081000  | 1.310608000  |
| H                                                                          | 5.995665000  | -2.001856000 | 2.587863000  | C                                                                          | 1.474646000  | 0.190176000  | 0.241700000  |
| H                                                                          | 5.113041000  | 0.977329000  | 0.684966000  | C                                                                          | 2.506364000  | -2.146007000 | -0.165077000 |
| C                                                                          | 4.328999000  | 1.768388000  | -1.743458000 | C                                                                          | 3.849854000  | -2.676533000 | 0.399799000  |
| H                                                                          | 3.847512000  | -0.446353000 | -1.724576000 | H                                                                          | 5.135294000  | -1.603291000 | -1.002435000 |
| C                                                                          | 1.938366000  | -0.150695000 | 0.049572000  | H                                                                          | 5.745909000  | -1.553186000 | 0.651333000  |
| C                                                                          | 2.907726000  | 2.235098000  | 0.223896000  | Au                                                                         | -0.532111000 | -0.186804000 | 0.054637000  |
| Au                                                                         | -0.051906000 | 0.191935000  | 0.238817000  | H                                                                          | 1.724798000  | 1.232226000  | 0.482365000  |
| H                                                                          | 2.237325000  | -1.176967000 | -0.161207000 | H                                                                          | 1.635546000  | -2.643555000 | 0.269989000  |
| C                                                                          | 3.253975000  | 2.773011000  | -1.198633000 | H                                                                          | 2.474938000  | -2.328556000 | -1.250033000 |
| H                                                                          | 1.900261000  | 2.528587000  | 0.529732000  | C                                                                          | 5.680498000  | 1.904287000  | -2.396107000 |
| H                                                                          | 3.605839000  | 2.640144000  | 0.965164000  | O                                                                          | 6.790614000  | 0.758496000  | -0.464580000 |
| O                                                                          | 3.949024000  | -2.201337000 | 0.832491000  | C                                                                          | 5.804578000  | 2.890929000  | -1.342490000 |
| H                                                                          | 6.417571000  | -2.691879000 | 0.211367000  | H                                                                          | 6.573260000  | 1.484037000  | -2.847743000 |
| H                                                                          | 6.900826000  | -0.978278000 | -0.214272000 | H                                                                          | 4.763180000  | 1.813380000  | -2.965736000 |
| C                                                                          | 3.211848000  | -2.349919000 | 2.060028000  | C                                                                          | 7.295015000  | 1.087635000  | 0.857997000  |
| P                                                                          | -2.417238000 | 0.579534000  | 0.621348000  | H                                                                          | 4.979116000  | 3.564897000  | -1.139462000 |
| C                                                                          | -2.805245000 | 2.390947000  | 0.126742000  | H                                                                          | 6.793129000  | 3.267176000  | -1.099943000 |
| C                                                                          | -3.575851000 | -0.495163000 | -0.349225000 | C                                                                          | 3.755733000  | -2.849312000 | 1.927572000  |
| C                                                                          | -2.731572000 | 0.180691000  | 2.480369000  | C                                                                          | 4.284530000  | -3.995818000 | -0.250355000 |
| C                                                                          | -4.290285000 | 2.799877000  | 0.176266000  | P                                                                          | -2.870526000 | -0.767561000 | -0.203197000 |
| C                                                                          | -1.987897000 | 3.338623000  | 1.028274000  | C                                                                          | -3.263813000 | -2.124564000 | 1.109566000  |
| C                                                                          | -2.318895000 | 2.537428000  | -1.332873000 | C                                                                          | -4.133482000 | 0.573520000  | 0.046960000  |
| C                                                                          | -3.150397000 | -1.463418000 | -1.293908000 | C                                                                          | -3.098900000 | -1.343852000 | -2.021155000 |
| C                                                                          | -4.957428000 | -0.381720000 | -0.088067000 | C                                                                          | 8.623539000  | 0.379933000  | 1.031436000  |

|   |              |              |              |   |              |              |              |
|---|--------------|--------------|--------------|---|--------------|--------------|--------------|
| C | -4.030707000 | 0.752166000  | 3.079227000  | H | 6.567569000  | 0.762977000  | 1.612309000  |
| C | -1.540667000 | 0.713602000  | 3.309102000  | H | 7.407516000  | 2.176540000  | 0.938200000  |
| C | -2.746285000 | -1.359888000 | 2.588877000  | H | 9.342533000  | 0.712477000  | 0.278271000  |
| H | -4.895274000 | 2.234537000  | -0.535245000 | H | 8.503409000  | -0.702930000 | 0.942789000  |
| H | -4.363849000 | 3.856863000  | -0.104332000 | H | 9.031654000  | 0.602314000  | 2.021416000  |
| H | -4.731159000 | 2.699648000  | 1.170208000  | C | -4.519540000 | -2.981417000 | 0.862224000  |
| H | -2.059670000 | 4.356302000  | 0.628155000  | C | -2.046506000 | -3.071437000 | 1.209080000  |
| H | -2.370382000 | 3.366951000  | 2.051716000  | C | -3.404141000 | -1.379320000 | 2.455117000  |
| H | -0.927947000 | 3.067419000  | 1.062222000  | C | -3.799566000 | 1.922496000  | 0.323941000  |
| H | -2.492349000 | 3.568002000  | -1.663000000 | C | -5.499696000 | 0.234453000  | -0.040957000 |
| H | -2.868784000 | 1.878518000  | -2.011643000 | C | -4.533335000 | -1.698097000 | -2.456188000 |
| H | -1.250002000 | 2.325936000  | -1.434622000 | C | -2.179322000 | -2.557100000 | -2.271142000 |
| C | -4.119972000 | -2.274263000 | -1.912298000 | C | -2.613202000 | -0.160125000 | -2.888778000 |
| C | -1.740695000 | -1.723451000 | -1.733372000 | H | -5.440382000 | -2.396323000 | 0.836106000  |
| C | -5.900405000 | -1.188738000 | -0.717443000 | H | -4.621307000 | -3.693347000 | 1.689846000  |
| H | -5.311124000 | 0.351295000  | 0.623496000  | H | -4.449135000 | -3.568288000 | -0.057110000 |
| C | -5.477412000 | -2.147575000 | -1.635349000 | H | -2.238508000 | -3.806193000 | 1.999923000  |
| H | -3.786358000 | -3.012889000 | -2.634525000 | H | -1.866171000 | -3.623384000 | 0.284174000  |
| C | -1.131112000 | -0.920784000 | -2.710949000 | H | -1.132745000 | -2.528921000 | 1.466304000  |
| C | -1.074433000 | -2.882724000 | -1.303437000 | H | -3.495137000 | -2.116132000 | 3.261412000  |
| H | -6.196044000 | -2.789529000 | -2.135383000 | H | -4.289167000 | -0.739058000 | 2.483512000  |
| H | -6.954310000 | -1.067660000 | -0.487427000 | H | -2.523680000 | -0.763303000 | 2.667090000  |
| C | 0.114990000  | -1.266631000 | -3.240842000 | C | -4.837361000 | 2.858713000  | 0.486695000  |
| H | -1.650524000 | -0.043044000 | -3.082603000 | C | -2.417444000 | 2.483927000  | 0.481533000  |
| C | 0.172714000  | -3.225970000 | -1.830107000 | C | -6.512271000 | 1.173875000  | 0.130194000  |
| H | -1.549554000 | -3.528364000 | -0.570438000 | H | -5.784882000 | -0.786165000 | -0.253382000 |
| C | 0.769214000  | -2.420667000 | -2.803364000 | H | -5.198270000 | -0.832882000 | -2.424765000 |
| H | 0.557375000  | -0.649236000 | -4.017549000 | H | -4.975501000 | -2.500640000 | -1.862337000 |
| H | 1.723888000  | -2.705788000 | -3.236078000 | H | -4.502520000 | -2.044634000 | -3.495910000 |
| H | 0.665321000  | -4.135354000 | -1.498643000 | H | -2.546784000 | -3.461467000 | -1.778299000 |
| H | -4.929281000 | 0.374205000  | 2.588688000  | H | -2.150205000 | -2.764007000 | -3.347317000 |
| H | -4.052163000 | 1.844666000  | 3.062895000  | H | -1.153962000 | -2.369144000 | -1.937181000 |
| H | -4.090974000 | 0.445758000  | 4.129799000  | H | -3.227460000 | 0.732916000  | -2.737715000 |
| H | -1.458257000 | 1.801894000  | 3.282089000  | H | -1.570978000 | 0.098681000  | -2.680009000 |
| H | -1.686556000 | 0.421128000  | 4.355172000  | H | -2.690436000 | -0.439634000 | -3.946076000 |

|                                            |              |              |              |                                                                                |              |              |              |
|--------------------------------------------|--------------|--------------|--------------|--------------------------------------------------------------------------------|--------------|--------------|--------------|
| H                                          | -0.588722000 | 0.292393000  | 2.973652000  | C                                                                              | -6.178344000 | 2.500399000  | 0.393619000  |
| H                                          | -3.609753000 | -1.802440000 | 2.087244000  | H                                                                              | -4.569976000 | 3.889775000  | 0.696897000  |
| H                                          | -1.837744000 | -1.805586000 | 2.169402000  | C                                                                              | -1.824420000 | 2.556888000  | 1.751498000  |
| H                                          | -2.792926000 | -1.638168000 | 3.647678000  | C                                                                              | -1.773309000 | 3.103622000  | -0.599698000 |
| C                                          | 2.298055000  | -3.553262000 | 1.911072000  | H                                                                              | -7.551205000 | 0.867704000  | 0.055500000  |
| H                                          | 2.632814000  | -1.439510000 | 2.271508000  | H                                                                              | -6.952359000 | 3.249871000  | 0.528139000  |
| H                                          | 3.908400000  | -2.495213000 | 2.893854000  | C                                                                              | -0.614782000 | 3.228750000  | 1.935213000  |
| H                                          | 2.880884000  | -4.451929000 | 1.691041000  | H                                                                              | -2.326751000 | 2.104354000  | 2.601357000  |
| H                                          | 1.574987000  | -3.405055000 | 1.103322000  | C                                                                              | -0.562432000 | 3.773746000  | -0.416711000 |
| H                                          | 1.746112000  | -3.719476000 | 2.841243000  | H                                                                              | -2.235053000 | 3.078677000  | -1.582277000 |
| H                                          | 5.333797000  | 2.116793000  | -1.476832000 | C                                                                              | 0.017473000  | 3.842442000  | 0.851774000  |
| H                                          | 4.285300000  | 1.699893000  | -2.833463000 | H                                                                              | -0.178717000 | 3.288082000  | 2.928210000  |
| C                                          | 2.010818000  | 2.724543000  | -2.105813000 | H                                                                              | -0.087643000 | 4.263029000  | -1.262771000 |
| H                                          | 1.223436000  | 3.379382000  | -1.718324000 | H                                                                              | 0.944191000  | 4.390018000  | 1.000707000  |
| H                                          | 2.260272000  | 3.064542000  | -3.116471000 | H                                                                              | 3.041072000  | -3.639645000 | 2.178764000  |
| H                                          | 1.596421000  | 1.713771000  | -2.182311000 | H                                                                              | 4.725321000  | -3.128586000 | 2.354374000  |
| C                                          | 3.805594000  | 4.204267000  | -1.148782000 | H                                                                              | 3.412650000  | -1.936822000 | 2.428087000  |
| H                                          | 4.083370000  | 4.554447000  | -2.148371000 | H                                                                              | 4.358192000  | -3.898516000 | -1.339108000 |
| H                                          | 3.055761000  | 4.897587000  | -0.753631000 | H                                                                              | 5.259410000  | -4.324768000 | 0.126294000  |
| H                                          | 4.693184000  | 4.269839000  | -0.510231000 | H                                                                              | 3.563179000  | -4.790883000 | -0.033834000 |
| <b>Int2'''</b><br>E(RM06) = -1876.52065430 |              |              |              | <b>TS<sub>2'''-3'</sub></b><br>E(RM06) = -1876.48829413<br>Frequency -128.7058 |              |              |              |
| C                                          | -3.942314000 | 1.266959000  | 0.137984000  | C                                                                              | -4.350649000 | 1.276614000  | -0.189799000 |
| C                                          | -3.975350000 | 0.835046000  | -1.239177000 | C                                                                              | -4.247038000 | 1.482879000  | 2.044702000  |
| C                                          | -2.715403000 | 0.212289000  | -0.397521000 | C                                                                              | -4.006092000 | 0.160084000  | -1.081832000 |
| C                                          | -4.766797000 | 0.811450000  | 1.310746000  | C                                                                              | -5.405544000 | 1.475639000  | 0.712260000  |
| H                                          | -3.499753000 | 2.247371000  | 0.285413000  | H                                                                              | -3.641803000 | 2.100278000  | -0.229457000 |
| C                                          | -4.743542000 | -0.380554000 | -1.750227000 | C                                                                              | -2.562408000 | -0.338216000 | -0.621925000 |
| H                                          | -3.671831000 | 1.578018000  | -1.970987000 | C                                                                              | -4.874543000 | -1.113158000 | -1.128174000 |
| C                                          | -1.479057000 | 0.814326000  | -0.428906000 | H                                                                              | -3.875029000 | 0.599083000  | -2.081438000 |
| C                                          | -3.024516000 | -1.266780000 | -0.255217000 | C                                                                              | -1.475151000 | 0.436909000  | -0.561448000 |
| C                                          | -3.858594000 | -1.649286000 | -1.508918000 | C                                                                              | -2.711187000 | -1.827262000 | -0.380502000 |
| H                                          | -5.683269000 | -0.486295000 | -1.209981000 | O                                                                              | -6.435762000 | 0.614958000  | 0.777764000  |
| H                                          | -4.970665000 | -0.250352000 | -2.811759000 | C                                                                              | -5.205048000 | 2.565241000  | 1.750569000  |
| Au                                         | 0.367966000  | 0.030375000  | -0.108572000 | C                                                                              | -3.872313000 | -2.286796000 | -1.296142000 |

|   |              |              |              |    |              |              |              |
|---|--------------|--------------|--------------|----|--------------|--------------|--------------|
| H | -1.502712000 | 1.887907000  | -0.638722000 | H  | -5.415887000 | -1.241047000 | -0.188746000 |
| H | -2.093168000 | -1.834195000 | -0.185667000 | H  | -5.619595000 | -1.074611000 | -1.929000000 |
| H | -3.600789000 | -1.460381000 | 0.655236000  | Au | 0.455786000  | -0.097696000 | -0.119305000 |
| C | -4.049042000 | 0.464107000  | 2.598111000  | H  | -1.606023000 | 1.496053000  | -0.811337000 |
| O | -5.906384000 | 0.049227000  | 1.054505000  | H  | -1.770613000 | -2.349867000 | -0.575577000 |
| C | -4.806973000 | 1.754816000  | 2.512636000  | H  | -2.978749000 | -2.024354000 | 0.669108000  |
| H | -4.496387000 | -0.342073000 | 3.170157000  | C  | -3.394167000 | -2.395643000 | -2.756432000 |
| H | -2.963527000 | 0.490110000  | 2.596732000  | C  | -4.485051000 | -3.618639000 | -0.847381000 |
| C | -7.061726000 | 0.796821000  | 0.626294000  | P  | 2.694440000  | -0.828061000 | 0.449922000  |
| H | -4.254787000 | 2.688094000  | 2.455771000  | H  | -4.553866000 | 0.643114000  | 2.659174000  |
| H | -5.752563000 | 1.819867000  | 3.039895000  | H  | -3.182214000 | 1.604717000  | 1.889030000  |
| C | -2.928715000 | -1.877376000 | -2.714328000 | C  | -7.719206000 | 1.073220000  | 1.292731000  |
| C | -4.723618000 | -2.892290000 | -1.265406000 | H  | -4.788999000 | 3.502877000  | 1.391651000  |
| P | 2.537965000  | -0.956015000 | 0.327683000  | H  | -6.041474000 | 2.693824000  | 2.429476000  |
| C | 2.767462000  | -2.402933000 | -0.922525000 | C  | -8.760952000 | 0.059407000  | 0.864813000  |
| C | 3.998802000  | 0.166132000  | 0.117880000  | H  | -7.933051000 | 2.066787000  | 0.884637000  |
| C | 2.537658000  | -1.489238000 | 2.170790000  | H  | -7.664008000 | 1.140328000  | 2.385800000  |
| C | -8.233163000 | -0.163859000 | 0.534903000  | H  | -2.659350000 | -3.200675000 | -2.862294000 |
| H | -6.863414000 | 1.272146000  | -0.345436000 | H  | -4.231472000 | -2.618278000 | -3.426751000 |
| H | -7.266300000 | 1.596968000  | 1.348564000  | H  | -2.916947000 | -1.473190000 | -3.104408000 |
| H | -8.422536000 | -0.632220000 | 1.504446000  | H  | -4.826195000 | -3.570875000 | 0.193192000  |
| H | -8.042663000 | -0.954779000 | -0.196480000 | H  | -5.344034000 | -3.890420000 | -1.470842000 |
| H | -9.134532000 | 0.374964000  | 0.228603000  | H  | -3.754798000 | -4.431385000 | -0.922575000 |
| C | 3.824967000  | -3.455919000 | -0.541400000 | C  | 3.070091000  | -2.392926000 | -0.609148000 |
| C | 1.410082000  | -3.120543000 | -1.100422000 | C  | 4.096867000  | 0.351165000  | 0.144318000  |
| C | 3.148347000  | -1.747190000 | -2.267658000 | C  | 2.703429000  | -1.148510000 | 2.344812000  |
| C | 3.892492000  | 1.536999000  | -0.225867000 | C  | 4.205491000  | -3.304300000 | -0.106880000 |
| C | 5.288122000  | -0.374480000 | 0.306133000  | C  | 1.781030000  | -3.240774000 | -0.705975000 |
| C | 3.874931000  | -2.027713000 | 2.713621000  | C  | 3.411142000  | -1.876859000 | -2.024407000 |
| C | 1.438504000  | -2.551291000 | 2.376558000  | C  | 3.919252000  | 1.666274000  | -0.353587000 |
| C | 2.170470000  | -0.218406000 | 2.970551000  | C  | 5.410489000  | -0.077290000 | 0.428017000  |
| H | 4.829304000  | -3.039147000 | -0.448843000 | C  | 4.054162000  | -1.537769000 | 2.976108000  |
| H | 3.866652000  | -4.208351000 | -1.337333000 | C  | 1.664250000  | -2.244129000 | 2.661251000  |
| H | 3.574978000  | -3.981454000 | 0.383591000  | C  | 2.243865000  | 0.181675000  | 2.983602000  |
| H | 1.526580000  | -3.902817000 | -1.859161000 | H  | -8.526671000 | -0.931454000 | 1.262177000  |



|   |              |              |              |   |              |              |              |
|---|--------------|--------------|--------------|---|--------------|--------------|--------------|
| H | 1.062346000  | -3.602399000 | -0.184106000 | H | -8.819765000 | -0.002976000 | -0.224493000 |
| H | 0.629923000  | -2.434831000 | -1.443474000 | H | -9.739609000 | 0.361286000  | 1.248612000  |
| H | 3.162370000  | -2.518279000 | -3.046054000 | H | 5.176374000  | -2.806245000 | -0.084247000 |
| H | 4.136468000  | -1.282610000 | -2.236339000 | H | 4.301102000  | -4.151388000 | -0.796230000 |
| H | 2.419007000  | -0.987204000 | -2.568689000 | H | 3.998122000  | -3.718012000 | 0.882988000  |
| C | 5.069759000  | 2.297402000  | -0.348040000 | H | 1.972076000  | -4.091160000 | -1.371100000 |
| C | 2.625994000  | 2.292915000  | -0.501535000 | H | 1.466879000  | -3.643694000 | 0.259321000  |
| C | 6.440995000  | 0.393461000  | 0.171676000  | H | 0.949168000  | -2.666629000 | -1.123017000 |
| H | 5.400992000  | -1.417318000 | 0.568326000  | H | 3.503185000  | -2.733813000 | -2.701491000 |
| H | 4.655928000  | -1.265095000 | 2.707437000  | H | 4.355453000  | -1.327623000 | -2.048692000 |
| H | 4.235610000  | -2.904213000 | 2.171742000  | H | 2.622018000  | -1.227255000 | -2.417653000 |
| H | 3.725408000  | -2.330398000 | 3.756369000  | C | 5.050611000  | 2.484904000  | -0.526064000 |
| H | 1.704649000  | -3.512969000 | 1.929637000  | C | 2.619043000  | 2.303110000  | -0.746184000 |
| H | 1.305249000  | -2.719418000 | 3.451150000  | C | 6.518042000  | 0.744774000  | 0.241596000  |
| H | 0.475111000  | -2.231198000 | 1.967166000  | H | 5.578274000  | -1.074326000 | 0.810283000  |
| H | 2.903061000  | 0.581179000  | 2.824124000  | H | 4.791723000  | -0.737007000 | 2.894990000  |
| H | 1.181878000  | 0.165924000  | 2.701060000  | H | 4.480788000  | -2.450772000 | 2.554477000  |
| H | 2.157303000  | -0.463733000 | 4.038612000  | H | 3.893632000  | -1.720978000 | 4.045176000  |
| C | 6.331126000  | 1.743601000  | -0.154055000 | H | 2.002286000  | -3.235445000 | 2.346850000  |
| H | 4.978302000  | 3.347147000  | -0.609140000 | H | 1.509809000  | -2.284282000 | 3.745847000  |
| C | 2.136920000  | 2.395382000  | -1.814073000 | H | 0.696860000  | -2.040943000 | 2.191134000  |
| C | 2.015743000  | 3.055207000  | 0.506695000  | H | 2.941925000  | 0.996577000  | 2.768524000  |
| H | 7.414140000  | -0.062956000 | 0.323360000  | H | 1.250160000  | 0.478453000  | 2.635188000  |
| H | 7.217860000  | 2.360867000  | -0.260252000 | H | 2.202994000  | 0.059223000  | 4.072334000  |
| C | 1.062408000  | 3.237038000  | -2.110359000 | C | 6.336543000  | 2.040846000  | -0.235793000 |
| H | 2.621299000  | 1.835627000  | -2.608816000 | H | 4.902374000  | 3.491220000  | -0.905609000 |
| C | 0.940783000  | 3.896907000  | 0.210611000  | C | 2.147415000  | 2.197340000  | -2.064003000 |
| H | 2.403683000  | 3.009796000  | 1.520047000  | C | 1.950369000  | 3.158158000  | 0.142502000  |
| C | 0.464732000  | 3.994225000  | -1.099382000 | H | 7.511601000  | 0.372348000  | 0.471412000  |
| H | 0.711593000  | 3.320134000  | -3.134992000 | H | 7.186357000  | 2.699962000  | -0.385020000 |
| H | 0.495563000  | 4.496910000  | 0.999146000  | C | 1.031585000  | 2.924848000  | -2.481238000 |
| H | -0.348052000 | 4.675270000  | -1.335804000 | H | 2.672918000  | 1.560444000  | -2.769501000 |
| H | -2.270853000 | -2.735457000 | -2.539782000 | C | 0.833668000  | 3.885190000  | -0.274517000 |
| H | -3.510011000 | -2.081963000 | -3.619456000 | H | 2.322077000  | 3.270459000  | 1.156794000  |
| H | -2.294393000 | -1.006405000 | -2.914055000 | C | 0.373874000  | 3.773858000  | -1.588455000 |

|                                          |              |              |              |                                                                             |              |              |              |
|------------------------------------------|--------------|--------------|--------------|-----------------------------------------------------------------------------|--------------|--------------|--------------|
| H                                        | -5.388243000 | -2.746114000 | -0.407716000 | H                                                                           | 0.689483000  | 2.842269000  | -3.508723000 |
| H                                        | -5.341297000 | -3.119283000 | -2.140961000 | H                                                                           | 0.340695000  | 4.557968000  | 0.421963000  |
| H                                        | -4.100183000 | -3.770930000 | -1.067721000 | H                                                                           | -0.476936000 | 4.361483000  | -1.922175000 |
| <b>Int3'</b><br>E(RM06) = -1876.52516593 |              |              |              | <b>TS<sub>3-4'</sub></b><br>E(RM06) = -1876.52223973<br>Frequency -166.1114 |              |              |              |
| C                                        | -1.920381000 | -0.056175000 | -0.172021000 | C                                                                           | -2.010931000 | 0.491728000  | -0.300766000 |
| C                                        | -4.300996000 | 1.562451000  | 0.943924000  | C                                                                           | -3.137005000 | 1.446212000  | 1.164018000  |
| Au                                       | 0.105409000  | -0.325787000 | 0.004337000  | Au                                                                          | -0.070082000 | -0.129374000 | 0.056105000  |
| C                                        | -2.899421000 | -0.971096000 | -0.240356000 | C                                                                           | -3.107247000 | -0.316557000 | -0.521371000 |
| H                                        | -2.235114000 | 0.995815000  | -0.243427000 | H                                                                           | -2.095674000 | 1.473048000  | -0.773227000 |
| O                                        | -4.408324000 | 2.651093000  | 0.298784000  | O                                                                           | -2.775345000 | 2.717300000  | 1.144949000  |
| C                                        | -4.986388000 | 0.269328000  | 0.691667000  | C                                                                           | -4.577331000 | 1.066625000  | 0.738273000  |
| C                                        | -3.725435000 | 1.179489000  | 2.261980000  | C                                                                           | -3.173093000 | 0.587236000  | 2.428090000  |
| P                                        | 2.462978000  | -0.834821000 | 0.282130000  | P                                                                           | 2.165812000  | -0.945531000 | 0.490920000  |
| C                                        | -4.388943000 | -0.641798000 | -0.432690000 | C                                                                           | -4.511577000 | 0.287062000  | -0.588740000 |
| C                                        | -2.765073000 | -2.485047000 | -0.217950000 | C                                                                           | -3.228982000 | -1.804012000 | -0.509285000 |
| C                                        | -3.681631000 | 3.874847000  | 0.740356000  | C                                                                           | -1.559067000 | 3.139242000  | 1.827506000  |
| C                                        | -4.628979000 | -0.095041000 | 2.174487000  | C                                                                           | -4.651331000 | 0.232605000  | 2.062451000  |
| H                                        | -6.051776000 | 0.417129000  | 0.472969000  | H                                                                           | -5.261864000 | 1.918850000  | 0.710566000  |
| H                                        | -2.660857000 | 0.924095000  | 2.149584000  | H                                                                           | -2.478572000 | -0.252967000 | 2.453531000  |
| H                                        | -3.849838000 | 1.885900000  | 3.088535000  | H                                                                           | -3.054216000 | 1.171942000  | 3.345181000  |
| C                                        | 2.869750000  | -2.271143000 | -0.926242000 | C                                                                           | 2.266402000  | -2.733272000 | -0.200150000 |
| C                                        | 3.702430000  | 0.505244000  | -0.074832000 | C                                                                           | 3.556376000  | -0.005189000 | -0.302673000 |
| C                                        | 2.710597000  | -1.284959000 | 2.142975000  | C                                                                           | 2.458899000  | -0.831537000 | 2.393401000  |
| C                                        | -5.104774000 | -2.009467000 | -0.487295000 | C                                                                           | -5.469867000 | -0.909178000 | -0.793681000 |
| H                                        | -4.538460000 | -0.095035000 | -1.371890000 | H                                                                           | -4.576797000 | 0.997237000  | -1.422285000 |
| C                                        | -4.021607000 | -3.020208000 | -0.953480000 | C                                                                           | -4.569062000 | -2.100568000 | -1.245718000 |
| H                                        | -1.827648000 | -2.821837000 | -0.669797000 | H                                                                           | -2.351486000 | -2.303586000 | -0.931150000 |
| H                                        | -2.769624000 | -2.852379000 | 0.819933000  | H                                                                           | -3.300910000 | -2.136116000 | 0.541768000  |
| C                                        | -4.360856000 | 5.062367000  | 0.099635000  | C                                                                           | -1.650260000 | 4.635701000  | 2.050135000  |
| H                                        | -2.652638000 | 3.732913000  | 0.400274000  | H                                                                           | -0.720008000 | 2.868776000  | 1.179095000  |
| H                                        | -3.713420000 | 3.901077000  | 1.831797000  | H                                                                           | -1.467109000 | 2.590874000  | 2.770129000  |
| H                                        | -5.486266000 | -0.058876000 | 2.847345000  | H                                                                           | -5.379045000 | 0.624200000  | 2.774682000  |
| H                                        | -4.088702000 | -1.032787000 | 2.297317000  | H                                                                           | -4.835214000 | -0.835681000 | 1.935162000  |
| H                                        | -5.396421000 | 5.158586000  | 0.434816000  | H                                                                           | -2.497035000 | 4.888643000  | 2.693527000  |

|   |              |              |              |   |              |              |              |
|---|--------------|--------------|--------------|---|--------------|--------------|--------------|
| H | -4.344273000 | 4.984542000  | -0.990057000 | H | -1.764552000 | 5.165059000  | 1.100528000  |
| H | -3.823019000 | 5.970649000  | 0.387163000  | H | -0.734343000 | 4.988519000  | 2.533181000  |
| C | 1.994347000  | -3.485910000 | -0.554668000 | C | 1.23251000   | -3.607913000 | 0.542507000  |
| C | 2.456331000  | -1.764656000 | -2.326639000 | C | 1.859363000  | -2.629757000 | -1.686927000 |
| C | 4.343511000  | -2.715823000 | -0.997554000 | C | 3.649332000  | -3.409677000 | -0.131761000 |
| C | 3.356056000  | 1.814733000  | -0.496859000 | C | 3.365833000  | 1.111346000  | -1.156441000 |
| C | 5.065257000  | 0.227095000  | 0.159859000  | C | 4.879214000  | -0.386726000 | 0.004543000  |
| C | 1.488394000  | -2.103376000 | 2.617441000  | C | 1.142345000  | -1.204040000 | 3.113398000  |
| C | 2.713650000  | 0.059283000  | 2.903647000  | C | 2.767152000  | 0.651641000  | 2.693249000  |
| C | 3.983592000  | -2.076848000 | 2.495837000  | C | 3.581942000  | -1.715481000 | 2.968305000  |
| H | 2.067227000  | -4.233092000 | -1.353205000 | H | 1.151351000  | -4.571443000 | 0.026988000  |
| H | 2.328569000  | -3.965455000 | 0.369155000  | H | 1.536575000  | -3.818370000 | 1.572108000  |
| H | 0.939830000  | -3.214727000 | -0.444570000 | H | 0.241540000  | -3.148796000 | 0.558052000  |
| H | 2.639085000  | -2.558665000 | -3.059848000 | H | 1.873943000  | -3.632432000 | -2.129505000 |
| H | 3.045244000  | -0.894202000 | -2.632600000 | H | 2.558297000  | -2.009307000 | -2.255850000 |
| H | 1.395255000  | -1.501465000 | -2.370379000 | H | 0.852476000  | -2.219591000 | -1.810110000 |
| H | 4.993244000  | -1.925237000 | -1.377959000 | H | 4.388495000  | -2.893834000 | -0.747701000 |
| H | 4.414702000  | -3.556874000 | -1.697100000 | H | 3.553675000  | -4.427800000 | -0.526711000 |
| H | 4.735638000  | -3.061959000 | -0.038665000 | H | 4.037701000  | -3.494132000 | 0.885232000  |
| C | 4.378650000  | 2.772168000  | -0.639845000 | C | 4.497480000  | 1.796113000  | -1.636949000 |
| C | 1.986571000  | 2.318622000  | -0.837396000 | C | 2.054307000  | 1.656479000  | -1.637599000 |
| C | 6.062123000  | 1.185662000  | 0.002968000  | C | 5.985119000  | 0.299616000  | -0.488351000 |
| H | 5.361642000  | -0.762193000 | 0.477281000  | H | 5.057465000  | -1.240050000 | 0.643725000  |
| H | 1.415104000  | -3.075014000 | 2.124941000  | H | 0.839210000  | -2.237370000 | 2.932681000  |
| H | 1.588349000  | -2.286599000 | 3.693768000  | H | 1.289563000  | -1.087622000 | 4.193453000  |
| H | 0.550453000  | -1.567114000 | 2.449368000  | H | 0.318299000  | -0.551428000 | 2.811790000  |
| H | 3.596331000  | 0.661958000  | 2.676878000  | H | 3.730356000  | 0.965541000  | 2.285195000  |
| H | 1.822120000  | 0.653650000  | 2.675600000  | H | 1.992537000  | 1.314183000  | 2.291946000  |
| H | 2.712624000  | -0.142485000 | 3.981070000  | H | 2.798227000  | 0.794731000  | 3.779369000  |
| H | 4.902378000  | -1.539583000 | 2.255211000  | H | 4.565114000  | -1.480575000 | 2.557891000  |
| H | 4.011379000  | -3.057189000 | 2.013573000  | H | 3.386539000  | -2.781300000 | 2.827571000  |
| H | 3.993723000  | -2.251878000 | 3.578085000  | H | 3.640926000  | -1.540564000 | 4.048931000  |
| C | 5.714904000  | 2.474043000  | -0.395663000 | C | 5.792716000  | 1.405936000  | -1.312717000 |
| H | 4.104081000  | 3.770058000  | -0.967455000 | H | 4.341700000  | 2.649192000  | -2.290077000 |
| C | 1.397202000  | 3.311234000  | -0.038978000 | C | 1.564567000  | 2.866680000  | -1.119860000 |

|                                          |              |              |              |                                         |              |              |              |
|------------------------------------------|--------------|--------------|--------------|-----------------------------------------|--------------|--------------|--------------|
| C                                        | 1.355397000  | 1.963917000  | -2.040460000 | C                                       | 1.392502000  | 1.077405000  | -2.731680000 |
| H                                        | 7.098082000  | 0.923771000  | 0.194729000  | H                                       | 6.985758000  | -0.029543000 | -0.226067000 |
| H                                        | 6.474820000  | 3.239075000  | -0.522211000 | H                                       | 6.641101000  | 1.957848000  | -1.705514000 |
| C                                        | 0.212651000  | 3.935917000  | -0.435009000 | C                                       | 0.435529000  | 3.474429000  | -1.673807000 |
| H                                        | 1.887460000  | 3.613184000  | 0.881976000  | H                                       | 2.090938000  | 3.344290000  | -0.298106000 |
| C                                        | 0.171449000  | 2.587040000  | -2.437158000 | C                                       | 0.265113000  | 1.686191000  | -3.286908000 |
| H                                        | 1.812423000  | 1.220116000  | -2.684617000 | H                                       | 1.781110000  | 0.163126000  | -3.169057000 |
| C                                        | -0.400488000 | 3.580314000  | -1.638896000 | C                                       | -0.216762000 | 2.886768000  | -2.760426000 |
| H                                        | -0.203999000 | 4.729153000  | 0.181106000  | H                                       | 0.084344000  | 4.422636000  | -1.276121000 |
| H                                        | -0.289614000 | 2.312568000  | -3.381130000 | H                                       | -0.221042000 | 1.233826000  | -4.146354000 |
| H                                        | -1.299156000 | 4.093009000  | -1.971995000 | H                                       | -1.077152000 | 3.374056000  | -3.209878000 |
| H                                        | -5.987781000 | -2.000105000 | -1.134949000 | H                                       | -6.250653000 | -0.694059000 | -1.528130000 |
| H                                        | -5.443953000 | -2.294166000 | 0.517628000  | H                                       | -5.979394000 | -1.164848000 | 0.141291000  |
| C                                        | -4.373501000 | -4.458669000 | -0.556155000 | C                                       | -5.159552000 | -3.460268000 | -0.855735000 |
| H                                        | -5.294271000 | -4.791997000 | -1.047401000 | H                                       | -6.121200000 | -3.625085000 | -1.352785000 |
| H                                        | -3.576548000 | -5.151415000 | -0.847442000 | H                                       | -4.494025000 | -4.279728000 | -1.147627000 |
| H                                        | -4.517409000 | -4.550781000 | 0.526411000  | H                                       | -5.326017000 | -3.530262000 | 0.225122000  |
| C                                        | -3.825483000 | -2.933397000 | -2.479459000 | C                                       | -4.337408000 | -2.044093000 | -2.768594000 |
| H                                        | -3.036639000 | -3.619599000 | -2.805402000 | H                                       | -3.640222000 | -2.825980000 | -3.088262000 |
| H                                        | -4.744534000 | -3.207485000 | -3.008854000 | H                                       | -5.277634000 | -2.192861000 | -3.308978000 |
| H                                        | -3.536623000 | -1.927167000 | -2.801431000 | H                                       | -3.920855000 | -1.080558000 | -3.085346000 |
| <b>Int4'</b><br>E(RM06) = -1876.58516266 |              |              |              | <b>Int5</b><br>E(RM06) = -1952.94969423 |              |              |              |
| C                                        | -2.334370000 | 0.695806000  | -0.073754000 | C                                       | 4.340202000  | -0.513627000 | -0.218231000 |
| C                                        | -3.125544000 | 0.868307000  | 1.249143000  | O                                       | 3.274328000  | 2.433117000  | 0.605086000  |
| Au                                       | -0.170074000 | -0.137553000 | 0.154544000  | C                                       | 3.924254000  | -1.514762000 | -1.157443000 |
| C                                        | -2.763140000 | -0.447674000 | -0.710787000 | C                                       | 4.721604000  | -0.783890000 | 1.207490000  |
| H                                        | -1.903915000 | 1.549445000  | -0.599774000 | H                                       | 4.821433000  | 0.369948000  | -0.632880000 |
| O                                        | -4.058537000 | 1.915026000  | 1.143361000  | H                                       | 3.425242000  | 1.718295000  | 1.243982000  |
| C                                        | -3.764280000 | -0.543462000 | 1.471427000  | H                                       | 2.318833000  | 2.447570000  | 0.467888000  |
| C                                        | -2.354742000 | 0.701111000  | 2.589548000  | C                                       | 2.758132000  | -0.399710000 | -0.710436000 |
| P                                        | 2.111867000  | -0.668140000 | 0.524672000  | C                                       | 4.109108000  | -1.294186000 | -2.652652000 |
| C                                        | -3.749161000 | -1.235905000 | 0.105806000  | H                                       | 3.730027000  | -2.519885000 | -0.796654000 |
| C                                        | -2.539600000 | -1.163502000 | -2.013805000 | C                                       | 1.782064000  | -0.806955000 | 0.171999000  |
| C                                        | -3.537284000 | 3.237426000  | 1.296345000  | C                                       | 2.565642000  | 0.470747000  | -1.939901000 |
|                                          |              |              |              | C                                       | 2.929546000  | -0.404812000 | -3.170055000 |

|   |              |              |              |    |              |              |              |
|---|--------------|--------------|--------------|----|--------------|--------------|--------------|
| C | -2.680245000 | -0.819884000 | 2.550964000  | H  | 5.064972000  | -0.787515000 | -2.823817000 |
| H | -4.762127000 | -0.472481000 | 1.907056000  | H  | 4.146295000  | -2.251775000 | -3.178893000 |
| H | -1.304775000 | 1.007151000  | 2.628922000  | Au | -0.228192000 | -0.502308000 | 0.217599000  |
| H | -2.899903000 | 1.202438000  | 3.394184000  | H  | 2.151149000  | -1.472821000 | 0.953171000  |
| C | 2.446658000  | -2.395487000 | -0.245255000 | H  | 1.535064000  | 0.833099000  | -1.982471000 |
| C | 3.301140000  | 0.508825000  | -0.269055000 | H  | 3.212019000  | 1.352052000  | -1.868744000 |
| C | 2.396517000  | -0.546108000 | 2.427148000  | C  | 5.859721000  | -1.759383000 | 1.466319000  |
| C | -3.365962000 | -2.686546000 | -0.219411000 | C  | 4.457204000  | -2.107445000 | 1.885308000  |
| H | -4.724503000 | -1.042375000 | -0.372440000 | O  | 4.617189000  | 0.337252000  | 2.050325000  |
| C | -3.037234000 | -2.644789000 | -1.755102000 | H  | 6.291835000  | -2.278223000 | 0.616253000  |
| H | -3.146321000 | -0.678762000 | -2.790940000 | H  | 6.569118000  | -1.497654000 | 2.243345000  |
| H | -1.504426000 | -1.116000000 | -2.359676000 | H  | 4.219306000  | -2.039649000 | 2.941537000  |
| C | -4.700867000 | 4.211091000  | 1.218375000  | H  | 3.943074000  | -2.904441000 | 1.356927000  |
| H | -2.800359000 | 3.454066000  | 0.507545000  | C  | 5.752727000  | 1.239731000  | 2.058287000  |
| H | -3.020575000 | 3.327670000  | 2.263327000  | C  | 3.357685000  | 0.441771000  | -4.375643000 |
| H | -3.035498000 | -1.263105000 | 3.483476000  | C  | 1.738610000  | -1.302034000 | -3.554508000 |
| H | -1.851976000 | -1.428685000 | 2.177567000  | P  | -2.647980000 | -0.786569000 | 0.338442000  |
| H | -5.428092000 | 4.003179000  | 2.007843000  | C  | -3.001123000 | -1.548711000 | 2.075006000  |
| H | -5.209211000 | 4.128825000  | 0.253607000  | C  | -3.778617000 | 0.670058000  | 0.149889000  |
| H | -4.344798000 | 5.238870000  | 1.337119000  | C  | -3.073582000 | -1.947594000 | -1.134029000 |
| C | 1.558933000  | -3.437695000 | 0.463738000  | C  | 5.490868000  | 2.312088000  | 3.099944000  |
| C | 2.032306000  | -2.285418000 | -1.728640000 | H  | 5.876799000  | 1.688849000  | 1.064924000  |
| C | 3.914838000  | -2.862679000 | -0.193984000 | H  | 6.659753000  | 0.672906000  | 2.295566000  |
| C | 2.930475000  | 1.627648000  | -1.057823000 | H  | 5.322137000  | 1.863870000  | 4.083070000  |
| C | 4.673744000  | 0.297463000  | -0.015630000 | H  | 4.621663000  | 2.914423000  | 2.824669000  |
| C | 1.226343000  | -1.238176000 | 3.157967000  | H  | 6.357708000  | 2.976148000  | 3.167140000  |
| C | 2.365514000  | 0.961672000  | 2.761617000  | C  | -4.319104000 | -2.336721000 | 2.208337000  |
| C | 3.713864000  | -1.157347000 | 2.943391000  | C  | -1.838849000 | -2.497191000 | 2.448690000  |
| H | 1.584646000  | -4.371184000 | -0.109052000 | C  | -3.001052000 | -0.369589000 | 3.071518000  |
| H | 1.918717000  | -3.667307000 | 1.469938000  | C  | -3.339550000 | 1.980965000  | -0.158857000 |
| H | 0.514937000  | -3.117054000 | 0.533485000  | C  | -5.166107000 | 0.445374000  | 0.273008000  |
| H | 2.194481000  | -3.254700000 | -2.213045000 | C  | -4.567935000 | -2.265361000 | -1.333451000 |
| H | 2.633556000  | -1.544872000 | -2.264273000 | C  | -2.297576000 | -3.270615000 | -0.970096000 |
| H | 0.976116000  | -2.027028000 | -1.845200000 | C  | -2.566315000 | -1.210624000 | -2.394036000 |
| H | 4.568846000  | -2.232637000 | -0.799355000 | H  | -5.205401000 | -1.725175000 | 2.032225000  |

|   |              |              |              |   |              |              |              |
|---|--------------|--------------|--------------|---|--------------|--------------|--------------|
| H | 3.963264000  | -3.874472000 | -0.611753000 | H | -4.393776000 | -2.709631000 | 3.236289000  |
| H | 4.313542000  | -2.914254000 | 0.821012000  | H | -4.355011000 | -3.207921000 | 1.549274000  |
| C | 3.944721000  | 2.480001000  | -1.533507000 | H | -2.028048000 | -2.901361000 | 3.449671000  |
| C | 1.547423000  | 2.026300000  | -1.480055000 | H | -1.744587000 | -3.343912000 | 1.765463000  |
| C | 5.659207000  | 1.149770000  | -0.503714000 | H | -0.878952000 | -1.974119000 | 2.478623000  |
| H | 4.988982000  | -0.550027000 | 0.575933000  | H | -3.083298000 | -0.766747000 | 4.089380000  |
| H | 1.195456000  | -2.315211000 | 2.982584000  | H | -3.838858000 | 0.312189000  | 2.908371000  |
| H | 1.354412000  | -1.086317000 | 4.235368000  | H | -2.070289000 | 0.205669000  | 3.018034000  |
| H | 0.259484000  | -0.815943000 | 2.876859000  | C | -4.304600000 | 2.985408000  | -0.364885000 |
| H | 3.208096000  | 1.501172000  | 2.322581000  | C | -1.922686000 | 2.455714000  | -0.259497000 |
| H | 1.437642000  | 1.436226000  | 2.424669000  | C | -6.102419000 | 1.457366000  | 0.085796000  |
| H | 2.421180000  | 1.080060000  | 3.849267000  | H | -5.531245000 | -0.544130000 | 0.508113000  |
| H | 4.600391000  | -0.678206000 | 2.526132000  | H | -5.147744000 | -1.377672000 | -1.592141000 |
| H | 3.773301000  | -2.234208000 | 2.768503000  | H | -5.024782000 | -2.742369000 | -0.463927000 |
| H | 3.754478000  | -1.007053000 | 4.028003000  | H | -4.659054000 | -2.965869000 | -2.171514000 |
| C | 5.291076000  | 2.255531000  | -1.266146000 | H | -2.692171000 | -3.881271000 | -0.153545000 |
| H | 3.653697000  | 3.333525000  | -2.137561000 | H | -2.399565000 | -3.855666000 | -1.890995000 |
| C | 0.941300000  | 3.154438000  | -0.902845000 | H | -1.229316000 | -3.106847000 | -0.796826000 |
| C | 0.936247000  | 1.431962000  | -2.597909000 | H | -3.071891000 | -0.250573000 | -2.535009000 |
| H | 6.703026000  | 0.948199000  | -0.284894000 | H | -1.487986000 | -1.028493000 | -2.357096000 |
| H | 6.042783000  | 2.935758000  | -1.654194000 | H | -2.774822000 | -1.828497000 | -3.274863000 |
| C | -0.244924000 | 3.673559000  | -1.426967000 | C | -5.667997000 | 2.738472000  | -0.247181000 |
| H | 1.420317000  | 3.644112000  | -0.059844000 | H | -3.959482000 | 3.986643000  | -0.602845000 |
| C | -0.248099000 | 1.953676000  | -3.123404000 | C | -1.174305000 | 2.725694000  | 0.897062000  |
| H | 1.415923000  | 0.587995000  | -3.084394000 | C | -1.405287000 | 2.848621000  | -1.505041000 |
| C | -0.840520000 | 3.078035000  | -2.542071000 | H | -7.160519000 | 1.240234000  | 0.193323000  |
| H | -0.686827000 | 4.559944000  | -0.981451000 | H | -6.381404000 | 3.541285000  | -0.405520000 |
| H | -0.690634000 | 1.500101000  | -4.005481000 | C | 0.049881000  | 3.395486000  | 0.811147000  |
| H | -1.746564000 | 3.499057000  | -2.967384000 | H | -1.579576000 | 2.464343000  | 1.870077000  |
| H | -4.153786000 | -3.409528000 | 0.008764000  | C | -0.178433000 | 3.507392000  | -1.591973000 |
| H | -2.474373000 | -2.975603000 | 0.351028000  | H | -1.985967000 | 2.663581000  | -2.404215000 |
| C | -1.958634000 | -3.671942000 | -2.123389000 | C | 0.545577000  | 3.797967000  | -0.432489000 |
| H | -2.291750000 | -4.687697000 | -1.884956000 | H | 0.599529000  | 3.632650000  | 1.717712000  |
| H | -1.731023000 | -3.642652000 | -3.194782000 | H | 0.196515000  | 3.823252000  | -2.561110000 |
| H | -1.028609000 | -3.489400000 | -1.574232000 | H | 1.482655000  | 4.343350000  | -0.494311000 |

|                                                                            |              |              |              |                                         |              |              |              |
|----------------------------------------------------------------------------|--------------|--------------|--------------|-----------------------------------------|--------------|--------------|--------------|
| C                                                                          | -4.308004000 | -2.922643000 | -2.581328000 | H                                       | 3.662394000  | -0.191388000 | -5.215580000 |
| H                                                                          | -4.106287000 | -2.818974000 | -3.652960000 | H                                       | 2.531483000  | 1.071796000  | -4.721454000 |
| H                                                                          | -4.669836000 | -3.941091000 | -2.407773000 | H                                       | 4.197784000  | 1.098030000  | -4.124262000 |
| H                                                                          | -5.121166000 | -2.232589000 | -2.330605000 | H                                       | 2.006658000  | -1.972958000 | -4.377456000 |
|                                                                            |              |              |              | H                                       | 1.403018000  | -1.918758000 | -2.713498000 |
|                                                                            |              |              |              | H                                       | 0.888319000  | -0.694830000 | -3.882054000 |
| <b>TS<sub>5-6</sub></b><br>E(RM06) = -1952.92780272<br>Frequency -118.5264 |              |              |              | <b>Int6</b><br>E(RM06) = -1952.94500758 |              |              |              |
| C                                                                          | 4.697459000  | -0.085237000 | 0.001804000  | C                                       | 4.508509000  | 0.005276000  | -0.250418000 |
| O                                                                          | 3.402444000  | 1.656312000  | -0.651474000 | O                                       | 3.440987000  | 0.764861000  | -1.013115000 |
| C                                                                          | 3.912744000  | -1.319415000 | 0.146842000  | C                                       | 3.953643000  | -1.405412000 | 0.053217000  |
| C                                                                          | 5.329735000  | 0.635665000  | 1.071150000  | C                                       | 4.879497000  | 0.938376000  | 0.897694000  |
| H                                                                          | 5.015331000  | 0.171197000  | -1.001914000 | H                                       | 5.323603000  | -0.047279000 | -0.974966000 |
| H                                                                          | 3.597271000  | 2.366009000  | -0.022069000 | H                                       | 3.541966000  | 1.702696000  | -0.682517000 |
| H                                                                          | 2.496621000  | 1.341416000  | -0.469473000 | H                                       | 2.543260000  | 0.335149000  | -0.698646000 |
| C                                                                          | 2.385425000  | -1.103675000 | -0.241825000 | C                                       | 2.407135000  | -1.465035000 | -0.045179000 |
| C                                                                          | 4.396575000  | -2.427087000 | -0.844768000 | C                                       | 4.441850000  | -2.479184000 | -0.948607000 |
| H                                                                          | 3.933921000  | -1.672070000 | 1.180121000  | H                                       | 4.266743000  | -1.673776000 | 1.067268000  |
| C                                                                          | 1.513283000  | -0.438659000 | 0.527312000  | C                                       | 1.548704000  | -0.608564000 | 0.555682000  |
| C                                                                          | 2.146474000  | -1.915884000 | -1.494746000 | C                                       | 2.049980000  | -2.602301000 | -0.987905000 |
| C                                                                          | 3.119143000  | -3.113743000 | -1.398493000 | C                                       | 3.298008000  | -3.519830000 | -1.037487000 |
| H                                                                          | 4.947441000  | -1.970036000 | -1.675684000 | H                                       | 4.582587000  | -2.019789000 | -1.936243000 |
| H                                                                          | 5.079406000  | -3.128664000 | -0.355285000 | H                                       | 5.400035000  | -2.922289000 | -0.657823000 |
| Au                                                                         | -0.535077000 | -0.353800000 | 0.334510000  | Au                                      | -0.495675000 | -0.511044000 | 0.379851000  |
| H                                                                          | 1.929199000  | 0.050797000  | 1.413651000  | H                                       | 1.998718000  | 0.115978000  | 1.241126000  |
| H                                                                          | 1.097081000  | -2.211333000 | -1.574534000 | H                                       | 1.143883000  | -3.120208000 | -0.661566000 |
| H                                                                          | 2.388600000  | -1.321492000 | -2.388730000 | H                                       | 1.845712000  | -2.204710000 | -1.992817000 |
| C                                                                          | 6.084297000  | -0.238307000 | 2.144236000  | C                                       | 5.892384000  | 0.546306000  | 1.935902000  |
| C                                                                          | 4.862825000  | 0.494643000  | 2.525982000  | C                                       | 4.444363000  | 0.737115000  | 2.324029000  |
| O                                                                          | 5.874789000  | 1.879388000  | 0.793311000  | O                                       | 4.818544000  | 2.282873000  | 0.442313000  |
| H                                                                          | 6.058180000  | -1.317195000 | 2.039094000  | H                                       | 6.295646000  | -0.461935000 | 1.904661000  |
| H                                                                          | 7.049224000  | 0.185640000  | 2.401769000  | H                                       | 6.604365000  | 1.301965000  | 2.250270000  |
| H                                                                          | 4.975729000  | 1.418870000  | 3.082422000  | H                                       | 4.189493000  | 1.642604000  | 2.864152000  |
| H                                                                          | 3.951250000  | -0.058942000 | 2.719126000  | H                                       | 3.852724000  | -0.132837000 | 2.586326000  |
| C                                                                          | 7.035526000  | 1.911264000  | -0.066175000 | C                                       | 6.007817000  | 2.802750000  | -0.211205000 |

|   |              |              |              |   |              |              |              |
|---|--------------|--------------|--------------|---|--------------|--------------|--------------|
| C | 3.383849000  | -3.772531000 | -2.758525000 | C | 3.373811000  | -4.342542000 | -2.329533000 |
| C | 2.593693000  | -4.161921000 | -0.399299000 | C | 3.321112000  | -4.461535000 | 0.182511000  |
| P | -2.953084000 | -0.529431000 | 0.316401000  | P | -2.907801000 | -0.493523000 | 0.228399000  |
| C | -3.468217000 | -0.881011000 | 2.143134000  | C | -3.596283000 | -0.865489000 | 1.987957000  |
| C | -3.948160000 | 0.949351000  | -0.207711000 | C | -3.711229000 | 1.087186000  | -0.326268000 |
| C | -3.405524000 | -1.932096000 | -0.914354000 | C | -3.376474000 | -1.799094000 | -1.101516000 |
| C | 7.544998000  | 3.339502000  | -0.101967000 | C | 5.741046000  | 4.247912000  | -0.585497000 |
| H | 6.764150000  | 1.572164000  | -1.074806000 | H | 6.242868000  | 2.199573000  | -1.098383000 |
| H | 7.796299000  | 1.225378000  | 0.329811000  | H | 6.850060000  | 2.722647000  | 0.483233000  |
| H | 7.824117000  | 3.677391000  | 0.899466000  | H | 5.496724000  | 4.838376000  | 0.301356000  |
| H | 6.780754000  | 4.014436000  | -0.496790000 | H | 4.915049000  | 4.330305000  | -1.298728000 |
| H | 8.425594000  | 3.403100000  | -0.747364000 | H | 6.632007000  | 4.678363000  | -1.051492000 |
| C | -4.876124000 | -1.467461000 | 2.360085000  | C | -5.064605000 | -1.324883000 | 2.060928000  |
| C | -2.444202000 | -1.855043000 | 2.769282000  | C | -2.715323000 | -1.952023000 | 2.646157000  |
| C | -3.356442000 | 0.474336000  | 2.875699000  | C | -3.426221000 | 0.443220000  | 2.789820000  |
| C | -3.375089000 | 2.176654000  | -0.626029000 | C | -2.992309000 | 2.254704000  | -0.687248000 |
| C | -5.353945000 | 0.871621000  | -0.120897000 | C | -5.117910000 | 1.120660000  | -0.425625000 |
| C | -4.908115000 | -2.194024000 | -1.132165000 | C | -4.870421000 | -1.925208000 | -1.456386000 |
| C | -2.729022000 | -3.237206000 | -0.446732000 | C | -2.852925000 | -3.173729000 | -0.637145000 |
| C | -2.795883000 | -1.504746000 | -2.268419000 | C | -2.615896000 | -1.372676000 | -2.378060000 |
| H | -5.673187000 | -0.808628000 | 2.012383000  | H | -5.764430000 | -0.579054000 | 1.679685000  |
| H | -5.029317000 | -1.607363000 | 3.436533000  | H | -5.323187000 | -1.493122000 | 3.112844000  |
| H | -4.997069000 | -2.447176000 | 1.890578000  | H | -5.232030000 | -2.268323000 | 1.535459000  |
| H | -2.688614000 | -1.980522000 | 3.830517000  | H | -3.053845000 | -2.095238000 | 3.678887000  |
| H | -2.467592000 | -2.845141000 | 2.309212000  | H | -2.788565000 | -2.917848000 | 2.142028000  |
| H | -1.421807000 | -1.473795000 | 2.701971000  | H | -1.661049000 | -1.662971000 | 2.675719000  |
| H | -3.506575000 | 0.310415000  | 3.948899000  | H | -3.695750000 | 0.256461000  | 3.835481000  |
| H | -4.108841000 | 1.190706000  | 2.537476000  | H | -4.068404000 | 1.244885000  | 2.416267000  |
| H | -2.366847000 | 0.925352000  | 2.744565000  | H | -2.388215000 | 0.792116000  | 2.773311000  |
| C | -4.227652000 | 3.259570000  | -0.912339000 | C | -3.706213000 | 3.372225000  | -1.158619000 |
| C | -1.917777000 | 2.464583000  | -0.825150000 | C | -1.510052000 | 2.468741000  | -0.586882000 |
| C | -6.180190000 | 1.951303000  | -0.418464000 | C | -5.806920000 | 2.242283000  | -0.878126000 |
| H | -5.820984000 | -0.051992000 | 0.189348000  | H | -5.695037000 | 0.248848000  | -0.151590000 |
| H | -5.416083000 | -1.334261000 | -1.573419000 | H | -5.259520000 | -1.020007000 | -1.926277000 |
| H | -5.431104000 | -2.479370000 | -0.216863000 | H | -5.497832000 | -2.172234000 | -0.597284000 |



|                                                                          |              |              |              |                                          |              |              |              |
|--------------------------------------------------------------------------|--------------|--------------|--------------|------------------------------------------|--------------|--------------|--------------|
| H                                                                        | -5.013314000 | -3.027762000 | -1.836181000 | H                                        | -4.982685000 | -2.739208000 | -2.181996000 |
| H                                                                        | -3.209607000 | -3.654494000 | 0.442268000  | H                                        | -3.449348000 | -3.583833000 | 0.182155000  |
| H                                                                        | -2.815394000 | -3.985748000 | -1.242780000 | H                                        | -2.920715000 | -3.879874000 | -1.472666000 |
| H                                                                        | -1.665236000 | -3.096129000 | -0.231179000 | H                                        | -1.806948000 | -3.130313000 | -0.317718000 |
| H                                                                        | -3.249927000 | -0.582053000 | -2.642572000 | H                                        | -2.934182000 | -0.387079000 | -2.731467000 |
| H                                                                        | -1.713801000 | -1.356496000 | -2.203733000 | H                                        | -1.533311000 | -1.349725000 | -2.221221000 |
| H                                                                        | -2.987608000 | -2.290117000 | -3.008638000 | H                                        | -2.828397000 | -2.094476000 | -3.175178000 |
| C                                                                        | -5.611339000 | 3.160222000  | -0.812251000 | C                                        | -5.093719000 | 3.376381000  | -1.258700000 |
| H                                                                        | -3.778516000 | 4.194844000  | -1.231826000 | H                                        | -3.146081000 | 4.259915000  | -1.435885000 |
| C                                                                        | -1.243941000 | 3.309023000  | 0.071093000  | C                                        | -0.936539000 | 2.886606000  | 0.625521000  |
| C                                                                        | -1.259269000 | 2.066085000  | -1.999093000 | C                                        | -0.710743000 | 2.457331000  | -1.739668000 |
| H                                                                        | -7.257573000 | 1.844813000  | -0.338046000 | H                                        | -6.890801000 | 2.223056000  | -0.935850000 |
| H                                                                        | -6.236454000 | 4.016930000  | -1.044750000 | H                                        | -5.610015000 | 4.259633000  | -1.621990000 |
| C                                                                        | 0.054240000  | 3.745504000  | -0.199785000 | C                                        | 0.398467000  | 3.287804000  | 0.682538000  |
| H                                                                        | -1.751814000 | 3.644119000  | 0.970813000  | H                                        | -1.552338000 | 2.931386000  | 1.518555000  |
| C                                                                        | 0.036819000  | 2.505390000  | -2.272295000 | C                                        | 0.625895000  | 2.860680000  | -1.685499000 |
| H                                                                        | -1.778762000 | 1.439840000  | -2.717431000 | H                                        | -1.147240000 | 2.159851000  | -2.688439000 |
| C                                                                        | 0.695029000  | 3.352621000  | -1.377289000 | C                                        | 1.181391000  | 3.285285000  | -0.475215000 |
| H                                                                        | 0.549887000  | 4.417044000  | 0.496025000  | H                                        | 0.816223000  | 3.633721000  | 1.623539000  |
| H                                                                        | 0.521903000  | 2.207959000  | -3.197455000 | H                                        | 1.217061000  | 2.876039000  | -2.597325000 |
| H                                                                        | 1.692547000  | 3.713836000  | -1.608193000 | H                                        | 2.202643000  | 3.658439000  | -0.434553000 |
| H                                                                        | 4.134182000  | -4.566214000 | -2.675816000 | H                                        | 4.292253000  | -4.938311000 | -2.364992000 |
| H                                                                        | 2.469495000  | -4.225492000 | -3.155568000 | H                                        | 2.529411000  | -5.036030000 | -2.402941000 |
| H                                                                        | 3.742936000  | -3.043533000 | -3.493475000 | H                                        | 3.356304000  | -3.697665000 | -3.215322000 |
| H                                                                        | 3.323486000  | -4.966235000 | -0.257105000 | H                                        | 4.248402000  | -5.043768000 | 0.210316000  |
| H                                                                        | 2.375431000  | -3.724424000 | 0.580565000  | H                                        | 3.236233000  | -3.918275000 | 1.130166000  |
| H                                                                        | 1.668133000  | -4.615291000 | -0.769019000 | H                                        | 2.486069000  | -5.168361000 | 0.138265000  |
| <b>TS<sub>6'</sub></b><br>E(RM06) = -1952.92382092<br>Frequency -28.1258 |              |              |              | <b>Int6'</b><br>E(RM06) = -1952.92784106 |              |              |              |
| C                                                                        | 4.888525000  | -0.030375000 | -0.115103000 | O                                        | -5.997981000 | 0.625373000  | -0.943768000 |
| O                                                                        | 4.634441000  | 0.744215000  | 1.093200000  | C                                        | -4.590518000 | 0.543596000  | -0.518404000 |
| C                                                                        | 3.881379000  | 0.288779000  | -1.245173000 | C                                        | -3.930169000 | -0.714413000 | -1.091421000 |
| C                                                                        | 5.004961000  | -1.466591000 | 0.404536000  | C                                        | -4.648460000 | 0.753130000  | 1.010434000  |
| H                                                                        | 5.892227000  | 0.276991000  | -0.432333000 | H                                        | -4.122166000 | 1.426637000  | -0.963138000 |
| H                                                                        | 5.290795000  | -0.353802000 | 1.920353000  | H                                        | -6.318955000 | -0.272556000 | -1.124500000 |

|    |              |              |              |    |              |              |              |
|----|--------------|--------------|--------------|----|--------------|--------------|--------------|
| H  | 3.663524000  | 0.796253000  | 1.185973000  | C  | -2.477622000 | -0.960183000 | -0.624399000 |
| C  | 2.481561000  | 0.670619000  | -0.716716000 | C  | -4.676017000 | -2.043633000 | -0.813887000 |
| C  | 4.338811000  | 1.541775000  | -2.063302000 | H  | -3.924185000 | -0.543036000 | -2.175848000 |
| H  | 3.832794000  | -0.592861000 | -1.887886000 | C  | -3.524723000 | 1.050670000  | 1.946219000  |
| C  | 1.448779000  | -0.171991000 | -0.567185000 | C  | -4.349869000 | -0.206828000 | 2.120028000  |
| C  | 2.431380000  | 2.191177000  | -0.652807000 | O  | -5.908796000 | 1.527822000  | 1.237430000  |
| C  | 3.267652000  | 2.671821000  | -1.869800000 | H  | -6.385871000 | 1.219094000  | 0.355012000  |
| H  | 5.330908000  | 1.887778000  | -1.736313000 | C  | -1.493178000 | -0.048585000 | -0.668417000 |
| H  | 4.434989000  | 1.280396000  | -3.122403000 | C  | -2.374017000 | -2.422029000 | -0.210887000 |
| Au | -0.483109000 | 0.188067000  | 0.010533000  | C  | -3.574510000 | -3.141117000 | -0.878283000 |
| H  | 1.645994000  | -1.220141000 | -0.815808000 | H  | -5.124459000 | -2.045750000 | 0.187274000  |
| H  | 1.400123000  | 2.548642000  | -0.685459000 | H  | -5.480355000 | -2.248435000 | -1.533620000 |
| H  | 2.880130000  | 2.600464000  | 0.261316000  | Au | 0.484633000  | -0.260300000 | -0.173220000 |
| C  | 5.300861000  | -2.716259000 | -0.358131000 | H  | -1.771055000 | 0.944886000  | -1.038998000 |
| C  | 3.992647000  | -2.565402000 | 0.398552000  | H  | -1.411506000 | -2.855215000 | -0.497170000 |
| O  | 5.672708000  | -1.310783000 | 1.732426000  | H  | -2.445858000 | -2.528782000 | 0.882801000  |
| H  | 5.300807000  | -2.640943000 | -1.441855000 | C  | -3.996753000 | -4.413532000 | -0.133972000 |
| H  | 6.036778000  | -3.412076000 | 0.038444000  | C  | -3.243393000 | -3.481704000 | -2.344442000 |
| H  | 3.888887000  | -3.132861000 | 1.313078000  | P  | 2.802945000  | -0.625716000 | 0.458957000  |
| H  | 3.075572000  | -2.398511000 | -0.147846000 | H  | -2.525406000 | 0.949246000  | 1.535239000  |
| C  | 7.168842000  | -1.299982000 | 1.794355000  | H  | -3.653253000 | 1.841089000  | 2.679079000  |
| C  | 3.937384000  | 4.030188000  | -1.602358000 | H  | -5.055902000 | -0.239658000 | 2.943688000  |
| C  | 2.367586000  | 2.766776000  | -3.120901000 | H  | -3.895119000 | -1.154578000 | 1.862128000  |
| P  | -2.764223000 | 0.609341000  | 0.717073000  | C  | -5.835305000 | 3.023047000  | 1.250239000  |
| C  | -3.244397000 | 2.369307000  | 0.094184000  | C  | -7.249148000 | 3.557092000  | 1.202734000  |
| C  | -4.085568000 | -0.538843000 | 0.091435000  | H  | -5.227582000 | 3.332272000  | 0.396628000  |
| C  | -2.796973000 | 0.430437000  | 2.627860000  | H  | -5.322789000 | 3.270961000  | 2.178159000  |
| C  | 7.573296000  | -0.895859000 | 3.194034000  | H  | -4.874911000 | -4.875624000 | -0.598801000 |
| H  | 7.524832000  | -0.606696000 | 1.028317000  | H  | -3.191579000 | -5.155673000 | -0.144566000 |
| H  | 7.466044000  | -2.317075000 | 1.545950000  | H  | -4.241777000 | -4.203375000 | 0.913706000  |
| H  | 7.144144000  | -1.567076000 | 3.938061000  | H  | -4.119601000 | -3.885552000 | -2.863933000 |
| H  | 7.276886000  | 0.136352000  | 3.421438000  | H  | -2.890218000 | -2.607604000 | -2.901146000 |
| H  | 8.663554000  | -0.949054000 | 3.269836000  | H  | -2.452618000 | -4.237454000 | -2.390274000 |
| C  | -4.408896000 | 3.067685000  | 0.825967000  | C  | 3.404805000  | -2.209511000 | -0.462378000 |
| C  | -1.996082000 | 3.273741000  | 0.217347000  | C  | 4.043081000  | 0.703664000  | 0.068129000  |

|   |              |              |              |   |              |              |              |
|---|--------------|--------------|--------------|---|--------------|--------------|--------------|
| C | -3.591938000 | 2.221954000  | -1.404835000 | C | 2.830501000  | -0.788009000 | 2.372974000  |
| C | -3.807326000 | -1.672299000 | -0.711466000 | C | 4.628397000  | -2.931804000 | 0.133233000  |
| C | -5.428726000 | -0.273648000 | 0.425676000  | C | 2.231934000  | -3.215168000 | -0.514738000 |
| C | -4.168575000 | 0.557971000  | 3.313188000  | C | 3.722686000  | -1.769151000 | -1.908101000 |
| C | -1.827331000 | 1.465204000  | 3.233600000  | C | 3.697430000  | 1.946993000  | -0.518059000 |
| C | -2.254951000 | -0.989954000 | 2.910597000  | C | 5.398438000  | 0.476801000  | 0.385597000  |
| H | -5.354199000 | 2.532729000  | 0.720052000  | C | 4.212256000  | -0.940201000 | 3.036098000  |
| H | -4.555018000 | 4.058322000  | 0.381606000  | C | 1.941453000  | -1.983614000 | 2.773244000  |
| H | -4.202532000 | 3.220932000  | 1.889593000  | C | 2.187221000  | 0.514616000  | 2.901442000  |
| H | -2.231532000 | 4.256450000  | -0.208070000 | H | -7.838304000 | 3.195079000  | 2.048762000  |
| H | -1.687216000 | 3.427789000  | 1.253620000  | H | -7.753126000 | 3.289095000  | 0.269214000  |
| H | -1.143347000 | 2.867122000  | -0.335995000 | H | -7.209743000 | 4.649088000  | 1.256304000  |
| H | -3.750745000 | 3.223501000  | -1.825926000 | H | 5.526384000  | -2.311640000 | 0.152049000  |
| H | -4.504966000 | 1.641151000  | -1.561204000 | H | 4.858274000  | -3.800241000 | -0.495473000 |
| H | -2.781156000 | 1.749742000  | -1.964670000 | H | 4.440695000  | -3.308877000 | 1.141815000  |
| C | -4.877385000 | -2.484523000 | -1.130824000 | H | 2.550314000  | -4.094203000 | -1.087735000 |
| C | -2.456570000 | -2.108970000 | -1.195856000 | H | 1.927469000  | -3.560657000 | 0.475601000  |
| C | -6.474428000 | -1.083922000 | -0.006539000 | H | 1.355725000  | -2.787559000 | -1.009481000 |
| H | -5.670207000 | 0.585254000  | 1.038029000  | H | 3.940294000  | -2.658808000 | -2.510229000 |
| H | -4.860992000 | -0.227844000 | 3.001361000  | H | 4.591689000  | -1.108718000 | -1.958139000 |
| H | -4.646486000 | 1.528126000  | 3.141780000  | H | 2.871491000  | -1.257899000 | -2.369983000 |
| H | -4.026164000 | 0.453075000  | 4.393734000  | C | 4.709033000  | 2.901681000  | -0.731379000 |
| H | -2.223092000 | 2.482714000  | 3.181691000  | C | 2.332331000  | 2.366084000  | -0.975204000 |
| H | -1.674894000 | 1.229692000  | 4.292497000  | C | 6.387189000  | 1.428707000  | 0.153897000  |
| H | -0.850764000 | 1.443480000  | 2.739163000  | H | 5.694185000  | -0.462220000 | 0.831900000  |
| H | -2.872299000 | -1.760605000 | 2.439351000  | H | 4.836844000  | -0.056639000 | 2.890784000  |
| H | -1.227140000 | -1.112238000 | 2.556305000  | H | 4.760615000  | -1.817286000 | 2.686833000  |
| H | -2.269241000 | -1.168399000 | 3.991392000  | H | 4.065479000  | -1.058855000 | 4.116218000  |
| C | -6.195297000 | -2.204095000 | -0.790061000 | H | 2.406773000  | -2.942788000 | 2.529682000  |
| H | -4.651965000 | -3.351144000 | -1.748615000 | H | 1.787568000  | -1.964674000 | 3.858580000  |
| C | -1.968431000 | -1.657193000 | -2.433605000 | H | 0.959243000  | -1.940942000 | 2.292062000  |
| C | -1.746093000 | -3.110415000 | -0.514452000 | H | 2.770219000  | 1.397643000  | 2.621906000  |
| H | -7.496608000 | -0.842163000 | 0.270114000  | H | 1.166886000  | 0.644574000  | 2.528832000  |
| H | -6.996758000 | -2.851249000 | -1.138802000 | H | 2.150372000  | 0.474806000  | 3.996581000  |
| C | -0.796973000 | -2.190500000 | -2.973283000 | C | 6.038522000  | 2.656821000  | -0.403641000 |

|                                                                           |              |              |              |                                         |              |              |              |
|---------------------------------------------------------------------------|--------------|--------------|--------------|-----------------------------------------|--------------|--------------|--------------|
| H                                                                         | -2.521940000 | -0.900190000 | -2.982231000 | H                                       | 4.431628000  | 3.851422000  | -1.178341000 |
| C                                                                         | -0.574986000 | -3.640501000 | -1.054913000 | C                                       | 1.882051000  | 2.036142000  | -2.262985000 |
| H                                                                         | -2.127465000 | -3.488288000 | 0.429157000  | C                                       | 1.560225000  | 3.238912000  | -0.194598000 |
| C                                                                         | -0.099669000 | -3.185749000 | -2.287115000 | H                                       | 7.418735000  | 1.209570000  | 0.412045000  |
| H                                                                         | -0.442743000 | -1.840600000 | -3.939477000 | H                                       | 6.793100000  | 3.415502000  | -0.587914000 |
| H                                                                         | -0.048908000 | -4.428185000 | -0.523843000 | C                                       | 0.686456000  | 2.561316000  | -2.755638000 |
| H                                                                         | 0.798366000  | -3.622377000 | -2.721750000 | H                                       | 2.485034000  | 1.384777000  | -2.888530000 |
| H                                                                         | 4.530622000  | 4.364540000  | -2.463285000 | C                                       | 0.362549000  | 3.761835000  | -0.686017000 |
| H                                                                         | 3.186928000  | 4.807711000  | -1.402452000 | H                                       | 1.911434000  | 3.523183000  | 0.793171000  |
| H                                                                         | 4.603532000  | 3.981140000  | -0.731060000 | C                                       | -0.075263000 | 3.428071000  | -1.969271000 |
| H                                                                         | 2.962738000  | 2.996389000  | -4.013895000 | H                                       | 0.360698000  | 2.305755000  | -3.759640000 |
| H                                                                         | 1.840516000  | 1.823484000  | -3.300156000 | H                                       | -0.213723000 | 4.449973000  | -0.073502000 |
| H                                                                         | 1.620017000  | 3.557095000  | -3.005502000 | H                                       | -0.992767000 | 3.856381000  | -2.363244000 |
| <b>TS<sub>g-7</sub></b><br>E(RM06) = -1952.92175125<br>Frequency -73.8571 |              |              |              | <b>Int7</b><br>E(RM06) = -1952.94382367 |              |              |              |
| O                                                                         | -6.249587000 | 1.183777000  | -1.220206000 | O                                       | -6.084416000 | 1.100425000  | -2.062350000 |
| C                                                                         | -4.340221000 | 0.527970000  | -0.350858000 | C                                       | -3.941051000 | 0.334091000  | 0.218859000  |
| C                                                                         | -3.967719000 | -0.573947000 | -1.238729000 | C                                       | -3.775531000 | -0.117425000 | -1.146300000 |
| C                                                                         | -4.810815000 | 0.622670000  | 1.051310000  | C                                       | -5.124333000 | 0.006641000  | 1.119384000  |
| H                                                                         | -3.996737000 | 1.492427000  | -0.714375000 | H                                       | -3.701379000 | 1.388376000  | 0.341097000  |
| H                                                                         | -6.882131000 | 0.453806000  | -1.285357000 | H                                       | -6.843918000 | 0.889599000  | -2.618829000 |
| C                                                                         | -2.539529000 | -0.844826000 | -0.628312000 | C                                       | -2.578086000 | -0.471043000 | 0.106989000  |
| C                                                                         | -4.698326000 | -1.934526000 | -1.207142000 | C                                       | -4.219477000 | -1.488073000 | -1.586155000 |
| H                                                                         | -3.875920000 | -0.181521000 | -2.252601000 | H                                       | -3.434310000 | 0.595923000  | -1.885432000 |
| C                                                                         | -3.998579000 | 0.109664000  | 2.242454000  | C                                       | -4.966260000 | -0.358617000 | 2.572529000  |
| C                                                                         | -5.311890000 | -0.521659000 | 1.913622000  | C                                       | -5.590783000 | -1.338241000 | 1.602838000  |
| O                                                                         | -5.515265000 | 1.830988000  | 1.258116000  | O                                       | -6.200424000 | 0.860228000  | 0.773301000  |
| H                                                                         | -6.475544000 | 1.666154000  | -0.401052000 | H                                       | -6.381667000 | 0.956468000  | -1.147349000 |
| C                                                                         | -1.499028000 | 0.004828000  | -0.742452000 | C                                       | -1.438565000 | 0.292330000  | -0.067624000 |
| C                                                                         | -2.590505000 | -2.250308000 | -0.060670000 | C                                       | -2.575682000 | -1.988503000 | 0.194658000  |
| C                                                                         | -3.603076000 | -3.013860000 | -0.953600000 | C                                       | -3.146267000 | -2.542687000 | -1.148519000 |
| H                                                                         | -5.455607000 | -1.965702000 | -0.420252000 | H                                       | -5.179678000 | -1.715648000 | -1.114249000 |
| H                                                                         | -5.223194000 | -2.105266000 | -2.151983000 | H                                       | -4.369915000 | -1.500592000 | -2.667671000 |
| Au                                                                        | 0.452273000  | -0.265308000 | -0.188526000 | Au                                      | 0.537640000  | -0.167306000 | 0.042434000  |
| H                                                                         | -1.711848000 | 0.957271000  | -1.234485000 | H                                       | -1.638292000 | 1.350851000  | -0.260173000 |

|   |              |              |              |   |              |              |              |
|---|--------------|--------------|--------------|---|--------------|--------------|--------------|
| H | -1.590315000 | -2.692987000 | -0.061326000 | H | -1.549134000 | -2.328581000 | 0.353419000  |
| H | -2.940840000 | -2.263170000 | 0.981383000  | H | -3.158096000 | -2.345440000 | 1.046731000  |
| C | -4.174798000 | -4.260253000 | -0.266907000 | C | -3.770696000 | -3.934475000 | -0.981657000 |
| C | -2.936437000 | -3.408723000 | -2.285777000 | C | -2.029568000 | -2.604880000 | -2.207320000 |
| P | 2.744805000  | -0.674225000 | 0.482666000  | P | 2.890753000  | -0.706165000 | 0.279158000  |
| H | -3.077169000 | -0.419525000 | 2.036474000  | H | -3.962808000 | -0.564937000 | 2.933791000  |
| H | -3.959679000 | 0.790519000  | 3.086199000  | H | -5.615426000 | 0.123638000  | 3.295325000  |
| H | -6.165258000 | -0.277873000 | 2.537348000  | H | -6.669438000 | -1.448830000 | 1.642042000  |
| H | -5.310095000 | -1.523988000 | 1.504714000  | H | -5.058562000 | -2.244743000 | 1.350172000  |
| C | -4.734064000 | 3.020933000  | 1.518128000  | C | -6.183246000 | 2.197289000  | 1.317208000  |
| C | -5.698372000 | 4.182784000  | 1.667940000  | C | -7.353914000 | 2.953156000  | 0.714271000  |
| H | -4.029673000 | 3.197176000  | 0.693824000  | H | -5.237006000 | 2.698155000  | 1.072704000  |
| H | -4.147457000 | 2.873293000  | 2.431954000  | H | -6.260850000 | 2.144202000  | 2.409736000  |
| H | -4.933089000 | -4.743387000 | -0.892359000 | H | -4.186806000 | -4.293150000 | -1.928823000 |
| H | -3.388905000 | -4.998295000 | -0.075425000 | H | -3.019160000 | -4.661482000 | -0.656029000 |
| H | -4.640393000 | -4.014738000 | 0.694910000  | H | -4.578327000 | -3.932609000 | -0.241956000 |
| H | -3.661215000 | -3.874144000 | -2.962087000 | H | -2.431860000 | -2.928871000 | -3.172717000 |
| H | -2.503180000 | -2.543239000 | -2.798407000 | H | -1.544231000 | -1.634137000 | -2.352651000 |
| H | -2.128882000 | -4.128349000 | -2.115263000 | H | -1.257129000 | -3.321406000 | -1.909514000 |
| C | 3.328863000  | -2.264248000 | -0.437054000 | C | 3.310110000  | -2.058915000 | -1.024773000 |
| C | 3.994789000  | 0.641477000  | 0.089481000  | C | 4.077840000  | 0.690872000  | -0.001682000 |
| C | 2.743771000  | -0.833446000 | 2.395760000  | C | 3.137786000  | -1.247724000 | 2.104282000  |
| C | 4.544174000  | -2.993212000 | 0.167075000  | C | 4.595430000  | -2.868461000 | -0.769230000 |
| C | 2.147242000  | -3.259247000 | -0.492732000 | C | 2.123525000  | -3.044952000 | -1.104710000 |
| C | 3.657745000  | -1.827719000 | -1.881681000 | C | 3.422168000  | -1.323920000 | -2.378323000 |
| C | 3.667548000  | 1.871205000  | -0.534229000 | C | 3.678267000  | 2.017250000  | -0.301731000 |
| C | 5.344578000  | 0.406688000  | 0.425299000  | C | 5.458415000  | 0.416882000  | 0.092287000  |
| C | 4.118663000  | -0.991137000 | 3.072218000  | C | 4.588502000  | -1.538072000 | 2.532820000  |
| C | 1.847046000  | -2.025772000 | 2.788370000  | C | 2.269568000  | -2.494108000 | 2.372228000  |
| C | 2.100916000  | 0.472955000  | 2.915403000  | C | 2.610949000  | -0.071412000 | 2.957768000  |
| H | -6.404785000 | 3.996703000  | 2.481140000  | H | -8.299460000 | 2.460433000  | 0.957368000  |
| H | -6.263454000 | 4.350324000  | 0.746304000  | H | -7.252648000 | 3.006242000  | -0.373476000 |
| H | -5.142860000 | 5.096755000  | 1.896441000  | H | -7.385140000 | 3.972321000  | 1.110085000  |
| H | 5.445163000  | -2.377590000 | 0.189465000  | H | 5.494248000  | -2.249831000 | -0.746864000 |
| H | 4.772390000  | -3.863991000 | -0.458716000 | H | 4.723298000  | -3.581898000 | -1.591545000 |

|   |              |              |              |   |              |              |              |
|---|--------------|--------------|--------------|---|--------------|--------------|--------------|
| H | 4.348450000  | -3.367038000 | 1.175322000  | H | 4.544704000  | -3.450572000 | 0.154265000  |
| H | 2.460887000  | -4.142204000 | -1.061958000 | H | 2.338644000  | -3.788487000 | -1.880788000 |
| H | 1.834813000  | -3.600423000 | 0.496615000  | H | 1.959050000  | -3.584247000 | -0.169637000 |
| H | 1.277747000  | -2.826244000 | -0.995000000 | H | 1.193263000  | -2.538325000 | -1.375822000 |
| H | 3.865903000  | -2.720548000 | -2.482223000 | H | 3.533049000  | -2.066468000 | -3.176445000 |
| H | 4.535963000  | -1.179496000 | -1.928172000 | H | 4.286846000  | -0.657258000 | -2.416818000 |
| H | 2.816268000  | -1.304670000 | -2.348473000 | H | 2.523350000  | -0.736771000 | -2.595813000 |
| C | 4.693519000  | 2.804047000  | -0.773176000 | C | 4.670486000  | 2.999749000  | -0.473335000 |
| C | 2.308979000  | 2.300010000  | -1.003874000 | C | 2.272160000  | 2.507917000  | -0.483983000 |
| C | 6.346428000  | 1.339077000  | 0.172259000  | C | 6.424288000  | 1.402097000  | -0.090103000 |
| H | 5.625904000  | -0.522677000 | 0.900454000  | H | 5.792902000  | -0.585908000 | 0.318650000  |
| H | 4.746916000  | -0.108920000 | 2.935562000  | H | 5.216283000  | -0.646484000 | 2.486091000  |
| H | 4.667551000  | -1.869257000 | 2.726305000  | H | 5.059066000  | -2.330064000 | 1.946933000  |
| H | 3.960249000  | -1.111925000 | 4.150246000  | H | 4.576680000  | -1.871589000 | 3.576794000  |
| H | 2.312134000  | -2.986802000 | 2.552313000  | H | 2.668734000  | -3.388163000 | 1.885587000  |
| H | 1.681732000  | -2.003588000 | 3.871763000  | H | 2.256793000  | -2.690558000 | 3.450270000  |
| H | 0.869353000  | -1.982577000 | 2.298182000  | H | 1.233975000  | -2.351977000 | 2.046988000  |
| H | 2.688131000  | 1.353440000  | 2.636797000  | H | 3.182932000  | 0.845199000  | 2.785108000  |
| H | 1.082258000  | 0.605656000  | 2.538587000  | H | 1.554918000  | 0.138719000  | 2.762532000  |
| H | 2.057844000  | 0.436988000  | 4.010264000  | H | 2.712807000  | -0.329947000 | 4.017896000  |
| C | 6.017532000  | 2.552124000  | -0.428695000 | C | 6.026778000  | 2.707530000  | -0.370521000 |
| H | 4.431715000  | 3.743665000  | -1.249820000 | H | 4.355203000  | 4.013441000  | -0.700378000 |
| C | 1.894583000  | 2.021933000  | -2.316057000 | C | 1.684486000  | 2.507170000  | -1.759593000 |
| C | 1.512069000  | 3.137064000  | -0.208421000 | C | 1.593932000  | 3.139357000  | 0.570294000  |
| H | 7.373058000  | 1.115981000  | 0.445823000  | H | 7.476567000  | 1.147775000  | -0.010244000 |
| H | 6.783165000  | 3.294565000  | -0.632106000 | H | 6.763926000  | 3.491790000  | -0.512497000 |
| C | 0.710479000  | 2.563983000  | -2.819195000 | C | 0.448370000  | 3.120852000  | -1.974940000 |
| H | 2.517698000  | 1.399527000  | -2.951374000 | H | 2.214252000  | 2.051213000  | -2.590857000 |
| C | 0.327017000  | 3.678233000  | -0.711247000 | C | 0.356282000  | 3.750848000  | 0.355617000  |
| H | 1.835570000  | 3.383194000  | 0.798745000  | H | 2.051080000  | 3.174595000  | 1.554826000  |
| C | -0.074637000 | 3.397249000  | -2.019060000 | C | -0.217007000 | 3.748388000  | -0.918449000 |
| H | 0.414550000  | 2.352065000  | -3.842497000 | H | 0.020340000  | 3.132105000  | -2.973195000 |
| H | -0.267230000 | 4.340223000  | -0.087474000 | H | -0.144560000 | 4.252643000  | 1.178585000  |
| H | -0.980397000 | 3.842904000  | -2.420805000 | H | -1.162455000 | 4.254242000  | -1.093016000 |
